# Supplementary material for: A Two-tiered compensatory response to loss of DNA repair modulates aging and stress response pathways
Source: Aging (Albany NY). 2010 Mar 29;2(3):133–59. doi: 10.18632/aging.100127 (PMC2871243; doi:10.18632/aging.100127)
Supplement: Supplementary Table 1 [file aging-02-133-s001.xls]

## Sheet: N2 vs nth-1
Comparative results from wildtype N2 vs nth-1
Probe Set ID	Gene Symbol	Gene Title	go biological process term	go molecular function term	go cellular component term	fold change
171730_x_at	vap-1	Venom-Allergen-like Protein	---	---	extracellular region	-2.33
171733_x_at	F23F12.9	hypothetical protein	regulation of transcription, DNA-dependent	transcription factor activity /// sequence-specific DNA binding /// protein dimerization activity	nucleus	-2.54
171735_x_at	col-147	COLlagen /// locus:col-147	embryonic development ending in birth or egg hatching	structural constituent of cuticle	integral to membrane	1.88
171766_x_at	F29G6.3	hypothetical protein	reproduction /// body morphogenesis /// positive regulation of growth rate	protein binding	---	2.42
171783_x_at	ubc-1	UBiquitin Conjugating enzyme /// locus:ubc-1	nematode larval development /// ubiquitin-dependent protein catabolic process /// growth /// post-translational protein modification /// regulation of protein metabolic process	ubiquitin-protein ligase activity /// protein binding /// ligase activity /// small conjugating protein ligase activity	---	-2.5
171792_x_at	tni-3	TropoNin I /// locus:tni-3	nematode larval development /// muscle contraction /// oviposition /// post-embryonic body morphogenesis	actin binding /// protein binding	---	-2.2
171841_x_at	hlh-11	Helix Loop Helix	transcription /// regulation of transcription, DNA-dependent /// regulation of transcription	DNA binding /// transcription regulator activity	nucleus	-2.42
171855_x_at	Y59A8A.3	status:Confirmed /// hypothetical protein	---	protein binding	integral to membrane	-2.59
171874_x_at	eft-4	Elongation FacTor	reproduction /// nematode larval development /// translation /// translational elongation /// gamete generation /// embryonic development ending in birth or egg hatching /// growth /// positive regulation of growth rate /// locomotion	nucleotide binding /// translation elongation factor activity /// GTPase activity /// GTP binding	cytoplasm /// cytoplasm	-1.88
171923_x_at	Y38F1A.6	Iron-containing alcohol dehydrogenases /// hypothetical protein	metabolic process /// molecular hydrogen transport /// oxidation reduction	oxidoreductase activity /// metal ion binding /// hydroxyacid-oxoacid transhydrogenase activity /// hydroxyacid-oxoacid transhydrogenase activity	mitochondrion /// mitochondrion	2.14
171932_x_at	F09C8.1	phospholipase precursor	lipid metabolic process	hydrolase activity, acting on ester bonds	integral to membrane	-2.47
171941_s_at	F44E5.4	Heat shock hsp70 proteins	positive regulation of growth rate	ATP binding	---	-2.53
171941_s_at	F44E5.5	Heat shock hsp70 proteins	positive regulation of growth rate	ATP binding	---	-2.53
171950_x_at	T12G3.7	hypothetical protein	---	---	integral to membrane	-2.37
171982_x_at	flp-1	FMRF-Like Peptide	neuropeptide signaling pathway	---	extracellular region	-5.19
171986_x_at	fip-2	Fungus-Induced Protein /// locus:fip-2	---	---	---	-2.22
171998_x_at	unc-13	UNCoordinated	intracellular signaling cascade /// positive regulation of growth rate /// locomotion /// regulation of pharyngeal pumping /// regulation of pharyngeal pumping /// regulation of oviposition /// regulation of oviposition	zinc ion binding /// diacylglycerol binding /// metal ion binding	---	2.03
172002_x_at	lec-7	Lec-7 mRNA, complete cds, splicing variant lec-7a	---	sugar binding	---	2.88
172003_x_at	lec-7	gaLECtin /// locus:lec-7	---	sugar binding	---	2.46
172012_x_at	kin-2	protein KINase	reproduction /// regulation of protein amino acid phosphorylation /// nematode larval development /// signal transduction /// body morphogenesis /// molting cycle, collagen and cuticulin-based cuticle /// growth /// locomotion	nucleotide binding /// protein binding /// cAMP-dependent protein kinase regulator activity /// kinase activity /// cAMP binding	cytoplasm /// cAMP-dependent protein kinase complex	-1.91
172015_x_at	Y82E9BR.17	hypothetical protein	---	zinc ion binding	intracellular	-1.93
172026_x_at	vap-1	Venom-Allergen-like Protein	---	---	extracellular region	-2.63
172046_x_at	hgo-1	HomoGentisate Oxidase /// locus:hgo-1	L-phenylalanine catabolic process /// tyrosine metabolic process /// tyrosine catabolic process /// oxidation reduction	homogentisate 1,2-dioxygenase activity /// iron ion binding /// oxidoreductase activity /// oxidoreductase activity, acting on single donors with incorporation of molecular oxygen, incorporation of two atoms of oxygen /// identical protein binding /// metal ion binding	---	-2.04
172052_x_at	---	---	---	---	---	-1.8
172053_x_at	---	---	---	---	---	6.53
172070_x_at	K06A9.1	hypothetical protein	---	---	integral to membrane	2.05
172071_x_at	---	---	---	---	---	2.85
172078_x_at	---	---	---	---	---	5.82
172093_x_at	Y54B9A.1	status:Predicted /// hypothetical protein	---	---	---	4.69
172101_x_at	ptl-1	Protein with Tau-Like repeats	negative regulation of microtubule depolymerization	protein binding	---	2.22
172102_x_at	---	---	---	---	---	5.3
172106_x_at	Y54F10AM.7	status:Predicted /// hypothetical protein	---	---	integral to membrane	4.59
172107_x_at	Y54F10AM.8	status:Confirmed /// hypothetical protein	lipid catabolic process	hydrolase activity	extracellular region	4.58
172111_x_at	---	---	---	---	---	2.55
172120_x_at	---	---	---	---	---	2.79
172123_x_at	unc-44	UNCoordinated	carbohydrate metabolic process /// signal transduction /// body morphogenesis /// positive regulation of growth rate /// locomotion /// positive regulation of locomotion /// positive regulation of multicellular organism growth	hydrolase activity, hydrolyzing O-glycosyl compounds /// protein binding /// protein binding	---	1.98
172136_x_at	---	---	---	---	---	1.96
172148_x_at	---	---	---	---	---	4.62
172153_x_at	unc-44	UNCoordinated	carbohydrate metabolic process /// signal transduction /// body morphogenesis /// positive regulation of growth rate /// locomotion /// positive regulation of locomotion /// positive regulation of multicellular organism growth	hydrolase activity, hydrolyzing O-glycosyl compounds /// protein binding /// protein binding	---	2.01
172154_x_at	---	---	---	---	---	5.68
172160_x_at	---	---	---	---	---	-1.9
172185_x_at	---	---	---	---	---	2.32
172190_x_at	F59F4.2	hypothetical protein /// status:Confirmed	---	protein binding	integral to membrane	-1.9
172200_x_at	C28D4.5	hypothetical protein /// status:Partially_confirmed	---	---	---	2.34
172218_x_at	dod-6	Downstream Of DAF-16 (regulated by DAF-16) /// locus:dod-6	determination of adult life span	---	integral to membrane	-3.5
172228_x_at	---	---	---	---	---	5.84
172233_at	T02D1.7	hypothetical protein /// status:Partially_confirmed	---	---	---	-2.85
172240_x_at	cnc-7	CaeNaCin (Caenorhabditis bacteriocin) /// locus:cnc-7	---	---	integral to membrane	-11.45
172244_x_at	---	---	---	---	---	2.62
172247_x_at	---	---	---	---	---	2.36
172248_x_at	T20G5.8	hypothetical protein /// status:Confirmed	determination of adult life span	---	integral to membrane	-4.79
172281_at	F31A9.2	hypothetical protein /// status:Partially_confirmed	embryonic development ending in birth or egg hatching	---	---	-2.07
172284_x_at	fip-2	Fungus-Induced Protein /// locus:fip-2	---	---	---	-1.9
172285_x_at	W02B3.6	hypothetical protein /// status:Predicted	---	---	integral to membrane	4.36
172299_x_at	H11L12.1	hypothetical protein /// status:Partially_confirmed	---	---	---	-1.91
172324_x_at	nspc-1 nspc-10 nspc-12 nspc-13 nspc-14 nspc-15 nspc-2 nspc-3 nspc-4 nspc-5 nspc-6 nspc-9	Nematode Specific Peptide family, group C /// Nematode Specific Peptide family, group C /// Nematode Specific Peptide family, group C /// Nematode Specific Peptide family, group C /// Nematode Specific Peptide family, group C /// Nematode Specific Peptide family, group C /// Nematode Specific Peptide family, group C /// Nematode Specific Peptide family, group C /// Nematode Specific Peptide famil…	---	---	---	-1.85
172332_at	T24D8.6	hypothetical protein /// status:Partially_confirmed	---	---	---	2.63
172334_x_at	nspc-1 nspc-10 nspc-12 nspc-13 nspc-14 nspc-15 nspc-2 nspc-3 nspc-4 nspc-5 nspc-6 nspc-9	Nematode Specific Peptide family, group C /// Nematode Specific Peptide family, group C /// Nematode Specific Peptide family, group C /// Nematode Specific Peptide family, group C /// Nematode Specific Peptide family, group C /// Nematode Specific Peptide family, group C /// Nematode Specific Peptide family, group C /// Nematode Specific Peptide family, group C /// Nematode Specific Peptide famil…	---	---	---	-1.87
172335_x_at	---	---	---	---	---	2.29
172340_x_at	C35B1.3	hypothetical protein /// status:Confirmed	---	---	integral to membrane	-17.5
172351_x_at	---	---	---	---	---	5.5
172352_at	C33A12.4	hypothetical protein /// status:Confirmed	---	---	---	-3.26
172357_x_at	nspc-10 nspc-12 nspc-13 nspc-14 nspc-15 nspc-2 nspc-3 nspc-6 nspc-9	Nematode Specific Peptide family, group C /// Nematode Specific Peptide family, group C /// Nematode Specific Peptide family, group C /// Nematode Specific Peptide family, group C /// Nematode Specific Peptide family, group C /// Nematode Specific Peptide family, group C /// Nematode Specific Peptide family, group C /// Nematode Specific Peptide family, group C /// Nematode Specific Peptide famil…	---	---	---	-1.89
172359_x_at	---	---	---	---	---	2.21
172371_x_at	F44E7.3	hypothetical protein /// status:Partially_confirmed	---	---	---	-1.81
172375_x_at	nlp-29	Neuropeptide-Like Protein /// locus:nlp-29	xenobiotic metabolic process /// neuropeptide signaling pathway /// defense response to bacterium /// defense response to fungus	---	extracellular region /// integral to membrane	-1.96
172384_x_at	---	---	---	---	---	-5.2
172387_x_at	---	---	---	---	---	5.12
172397_x_at	K09E3.4	hypothetical protein /// status:Confirmed	---	---	---	-2.07
172403_x_at	math-27	MATH (meprin-associated Traf homology) domain containing	---	---	---	1.96
172405_x_at	cnc-3	CaeNaCin (Caenorhabditis bacteriocin) /// locus:cnc-3	---	---	integral to membrane	-2.31
172414_x_at	K12B6.7	hypothetical protein /// status:Predicted	---	---	---	3.97
172417_x_at	nspb-3	Nematode Specific Peptide family, group B /// locus:nspb-3 /// locus:nspb-2	reproduction /// nematode larval development /// embryonic development ending in birth or egg hatching /// growth	---	integral to membrane	1.99
172422_x_at	K10D6.2	hypothetical protein	embryonic development ending in birth or egg hatching	---	integral to membrane	2.7
172426_x_at	F20A1.1	hypothetical protein /// status:Confirmed	---	---	---	-2.17
172427_x_at	nlp-28	Neuropeptide-Like Protein /// locus:nlp-28	neuropeptide signaling pathway	---	extracellular region /// integral to membrane	-2.3
172434_at	F53B3.5	hypothetical protein /// status:Partially_confirmed	---	structural molecule activity	tight junction /// integral to membrane	2.61
172446_x_at	T16A1.5	hypothetical protein /// status:Predicted	---	---	---	4.09
172447_at	M03D4.3	hypothetical protein /// status:Partially_confirmed	---	---	integral to membrane	-2.2
172454_x_at	F18E9.6	hypothetical protein /// status:Predicted	---	---	---	6.49
172455_x_at	F29G6.3	hypothetical protein	reproduction /// body morphogenesis /// positive regulation of growth rate	protein binding	---	2.36
172468_x_at	K01A2.9	hypothetical protein /// status:Predicted	---	---	integral to membrane	-1.81
172475_x_at	col-145	COLlagen /// locus:col-145	---	structural constituent of cuticle	integral to membrane	1.91
172481_x_at	math-3	MATH (meprin-associated Traf homology) domain containing	---	---	---	2.62
172490_at	F39F10.4	hypothetical protein /// status:Confirmed	---	---	---	-1.96
172496_x_at	---	---	---	---	---	-1.93
172515_x_at	W08A12.2	hypothetical protein /// status:Confirmed	---	---	integral to membrane	-2.54
172529_x_at	---	---	---	---	---	3.37
172530_x_at	srw-141	Serpentine Receptor, class W /// locus:srw-141	---	receptor activity	integral to membrane	-1.92
172579_x_at	F59E12.6	hypothetical protein	ubiquitin-dependent protein catabolic process /// embryonic development ending in birth or egg hatching	ubiquitin thiolesterase activity	---	3.74
172581_s_at	F32D8.12	hypothetical protein	---	catalytic activity /// oxidoreductase activity /// FAD binding	---	3.7
172593_x_at	---	---	---	---	---	-2.57
172616_x_at	---	---	---	---	---	4.85
172620_x_at	Y105C5B.12	hypothetical protein	reproduction /// one-carbon compound metabolic process /// positive regulation of growth rate /// locomotion /// positive regulation of locomotion /// hermaphrodite genitalia development	methionine adenosyltransferase activity /// ATP binding	---	2.56
172622_x_at	W04E12.7	hypothetical protein /// status:Confirmed	---	---	---	1.99
172624_x_at	Y38E10A.12	locus:nspe-3 /// hypothetical protein	---	---	integral to membrane	3.51
172640_x_at	---	---	---	---	---	-1.87
172646_x_at	---	---	---	---	---	-2.07
172676_x_at	---	---	---	---	---	4.77
172678_at	---	---	---	---	---	-2.23
172689_x_at	---	---	---	---	---	5.28
172690_x_at	F12A10.6	hypothetical protein /// status:Predicted	embryonic development ending in birth or egg hatching	---	---	-1.84
172701_x_at	col-125	COLlagen /// locus:col-125	nematode larval development /// body morphogenesis /// locomotion	structural constituent of cuticle	integral to membrane	2.04
172705_x_at	col-159	COLlagen /// locus:col-159	---	structural constituent of cuticle	integral to membrane	2.35
172708_x_at	---	---	---	---	---	5.48
172712_x_at	---	---	---	---	---	3.75
172713_x_at	nspc-1 nspc-10 nspc-12 nspc-13 nspc-14 nspc-15 nspc-2 nspc-3 nspc-4 nspc-5 nspc-6 nspc-9	Nematode Specific Peptide family, group C /// Nematode Specific Peptide family, group C /// Nematode Specific Peptide family, group C /// Nematode Specific Peptide family, group C /// Nematode Specific Peptide family, group C /// Nematode Specific Peptide family, group C /// Nematode Specific Peptide family, group C /// Nematode Specific Peptide family, group C /// Nematode Specific Peptide famil…	---	---	---	-2.03
172715_x_at	nspc-10 nspc-12 nspc-13 nspc-14 nspc-15 nspc-2 nspc-3 nspc-4 nspc-5 nspc-6 nspc-9	Nematode Specific Peptide family, group C /// Nematode Specific Peptide family, group C /// Nematode Specific Peptide family, group C /// Nematode Specific Peptide family, group C /// Nematode Specific Peptide family, group C /// Nematode Specific Peptide family, group C /// Nematode Specific Peptide family, group C /// Nematode Specific Peptide family, group C /// Nematode Specific Peptide famil…	---	---	---	-2.46
172716_x_at	nspc-10 nspc-12 nspc-13 nspc-14 nspc-15 nspc-2 nspc-3 nspc-6 nspc-9	Nematode Specific Peptide family, group C /// Nematode Specific Peptide family, group C /// Nematode Specific Peptide family, group C /// Nematode Specific Peptide family, group C /// Nematode Specific Peptide family, group C /// Nematode Specific Peptide family, group C /// Nematode Specific Peptide family, group C /// Nematode Specific Peptide family, group C /// Nematode Specific Peptide famil…	---	---	---	-2.03
172731_x_at	---	---	---	---	---	2.2
172735_x_at	col-167 col-168 col-170	COLlagen /// COLlagen /// COLlagen /// locus:col-167 /// locus:col-168 /// locus:col-170	body morphogenesis /// positive regulation of growth rate /// locomotion	structural constituent of cuticle	integral to membrane	1.85
172736_x_at	col-167	COLlagen /// locus:col-167 /// locus:col-168 /// locus:col-169	body morphogenesis /// positive regulation of growth rate /// locomotion	structural constituent of cuticle	integral to membrane	1.93
172741_x_at	cuticlin	cuticlin	---	---	---	2.07
172744_at	mtl-1	MeTaLlothionein /// locus:mtl-1	determination of adult life span /// response to heat /// positive regulation of growth rate /// response to cadmium ion	calcium ion binding /// cadmium ion binding /// metal ion binding	---	-2.53
172746_x_at	col-166	COLlagen /// locus:col-169 /// locus:col-170	body morphogenesis /// positive regulation of growth rate /// locomotion	structural constituent of cuticle	integral to membrane	2
172747_x_at	---	---	---	---	---	2.15
172748_x_at	---	---	---	---	---	2.18
172750_x_at	---	---	---	---	---	1.88
172760_x_at	---	---	---	---	---	5.07
172762_x_at	---	---	---	---	---	1.98
172765_x_at	---	---	---	---	---	2.03
172766_x_at	---	---	---	---	---	2.11
172767_x_at	---	---	---	---	---	2.09
172768_x_at	cyp-33C5	CYtochrome P450 family /// locus:cyp-33C5	positive regulation of growth rate	monooxygenase activity /// iron ion binding /// electron carrier activity /// heme binding	---	2.06
172769_x_at	cyp-33C4	CYtochrome P450 family /// locus:cyp-33C4	---	monooxygenase activity /// iron ion binding /// electron carrier activity /// heme binding	---	1.86
172772_x_at	skr-13	SKp1 Related (ubiquitin ligase complex component) /// locus:skr-13	reproduction /// ubiquitin-dependent protein catabolic process /// meiotic chromosome segregation	protein binding	---	-2.32
172790_x_at	cyp-13B1	CYtochrome P450 family	oxidation reduction	monooxygenase activity /// iron ion binding /// electron carrier activity /// oxidoreductase activity /// oxidoreductase activity /// heme binding /// metal ion binding	integral to membrane	2.2
172797_x_at	---	---	---	---	---	2.2
172803_x_at	col-107	COLlagen	---	structural constituent of cuticle	integral to membrane	2.3
172805_x_at	Y37H9A.5	hypothetical protein	translation /// embryonic development ending in birth or egg hatching /// positive regulation of growth rate /// negative regulation of multicellular organism growth	structural constituent of ribosome	intracellular /// ribosome	-1.84
172817_x_at	---	---	---	---	---	1.81
172819_x_at	---	---	---	---	---	1.8
172858_x_at	C53C11.4	S. muris microneme antigen	---	---	---	5.83
172878_x_at	col-13	COLlagen /// locus:col-12 /// locus:col-13	---	structural constituent of cuticle	integral to membrane	1.89
172879_x_at	col-12	COLlagen /// locus:col-12 /// locus:col-13	---	structural constituent of cuticle	integral to membrane	1.9
172901_x_at	hsp-16.48	Heat Shock Protein /// Heat Shock Protein /// locus:hsp-16.48 /// locus:hsp-16.49	response to stress /// determination of adult life span /// determination of adult life span /// response to heat /// endoplasmic reticulum unfolded protein response	---	---	-5.58
172901_x_at	hsp-16.49	Heat Shock Protein /// Heat Shock Protein /// locus:hsp-16.48 /// locus:hsp-16.49	response to stress /// determination of adult life span /// determination of adult life span /// response to heat /// endoplasmic reticulum unfolded protein response	---	---	-5.58
172913_x_at	---	---	---	---	---	2.12
172926_x_at	T05A7.9	small histidine-alanine-rich protein precursor (SHARP)	---	---	---	5.82
172945_s_at	F13C5.1	hypothetical protein /// status:Partially_confirmed	---	---	integral to membrane	-1.88
172960_x_at	hgo-1	HomoGentisate Oxidase /// locus:hgo-1	L-phenylalanine catabolic process /// tyrosine metabolic process /// tyrosine catabolic process /// oxidation reduction	homogentisate 1,2-dioxygenase activity /// iron ion binding /// oxidoreductase activity /// oxidoreductase activity, acting on single donors with incorporation of molecular oxygen, incorporation of two atoms of oxygen /// identical protein binding /// metal ion binding	---	-2.1
172968_x_at	---	---	---	---	---	2.52
172969_x_at	---	---	---	---	---	5.78
172970_x_at	---	---	---	---	---	2.12
172984_s_at	kel-8	KELch-repeat containing protein /// locus:kel-8	---	protein binding /// protein binding	---	2.97
173012_at	W07E11.1	glutamate synthase	nematode larval development /// glutamate biosynthetic process /// nitrogen compound metabolic process /// metabolic process /// embryonic development ending in birth or egg hatching /// growth /// positive regulation of growth rate	catalytic activity /// binding /// iron ion binding /// electron carrier activity /// FMN binding /// glutamate synthase activity /// oxidoreductase activity /// oxidoreductase activity, acting on the CH-NH2 group of donors, NAD or NADP as acceptor /// glutamate synthase activity, NADH or NADPH as acceptor /// FAD binding /// iron-sulfur cluster binding	---	-1.85
173024_s_at	cpsf-1	Cleavage and Polyadenylation Specificity Factor /// locus:cpsf-1	reproduction /// nematode larval development /// mRNA polyadenylation /// mRNA cleavage /// mRNA processing /// embryonic development ending in birth or egg hatching /// body morphogenesis /// growth /// positive regulation of multicellular organism growth	nucleic acid binding /// RNA binding	nucleus /// mRNA cleavage and polyadenylation specificity factor complex	2.21
173027_s_at	Y67A10A.9	status:Partially_confirmed /// hypothetical protein	---	---	integral to membrane	1.89
173033_at	D1086.9	hypothetical protein /// status:Partially_confirmed	---	---	---	2.99
173035_s_at	nas-9	Nematode AStacin protease	proteolysis /// embryonic development ending in birth or egg hatching	metalloendopeptidase activity /// peptidase activity /// metallopeptidase activity /// zinc ion binding /// hydrolase activity /// metal ion binding	extracellular region	-3.42
173045_at	fpn-1.1	FerroPortiN /// locus:fpn-1.1	iron ion transport	iron ion transmembrane transporter activity	integral to membrane	1.81
173053_s_at	man(9)-alpha-mannosidase	man(9)-alpha-mannosidase	---	mannosyl-oligosaccharide 1,2-alpha-mannosidase activity /// calcium ion binding	membrane	2.02
173073_s_at	T07D3.9	hypothetical protein	---	---	---	2.35
173083_s_at	H10E21.4	calcium-binding protein	---	calcium ion binding	---	2.73
173090_s_at	clec-65	C-type LECtin /// locus:clec-65	---	binding	---	-2.14
173097_at	Y105E8A.3	status:Partially_confirmed /// hypothetical protein	cation transport	cation transmembrane transporter activity	membrane /// integral to membrane	2.23
173125_s_at	unc-44	UNCoordinated	carbohydrate metabolic process /// signal transduction /// body morphogenesis /// positive regulation of growth rate /// locomotion /// positive regulation of locomotion /// positive regulation of multicellular organism growth	hydrolase activity, hydrolyzing O-glycosyl compounds /// protein binding /// protein binding	---	2.12
173151_s_at	C17C3.1	hypothetical protein	acyl-CoA metabolic process	acyl-CoA thioesterase activity	integral to membrane	2.66
173154_s_at	T26F2.2	hypothetical protein /// status:Partially_confirmed	---	---	---	-2.2
173159_s_at	nhr-112	Nuclear Hormone Receptor family	reproduction /// transcription /// regulation of transcription, DNA-dependent /// defense response	DNA binding /// transcription factor activity /// steroid hormone receptor activity /// zinc ion binding /// sequence-specific DNA binding /// metal ion binding	nucleus	-2.32
173172_s_at	cutl-9	CUTiclin-Like /// locus:cutl-9	---	---	integral to membrane	2.65
173173_at	F54D5.3	F54D5.3	---	---	---	-1.94
173175_s_at	ced-11	CEll Death abnormality /// locus:ced-11	apoptosis /// apoptotic program /// positive regulation of programmed cell death	hydrolase activity	membrane /// integral to membrane	2.25
173201_s_at	bath-26	BTB and MATH domain containing /// locus:bath-26	---	protein binding	---	-2.22
173203_at	---	---	---	---	---	1.87
173209_s_at	C50F4.1	hypothetical protein /// status:Partially_confirmed	---	---	---	-1.85
173214_s_at	phosphotransferase W10C8.5	phosphotransferase /// ATP transferase	---	catalytic activity /// kinase activity /// transferase activity, transferring phosphorus-containing groups	integral to membrane	2.06
173225_at	dao-6	Dauer or Aging adult Overexpression /// ParaQuat (Methylviologen) responsive /// locus:dao-6 /// locus:pqm-96	---	---	integral to membrane	-7.73
173225_at	pqm-96	Dauer or Aging adult Overexpression /// ParaQuat (Methylviologen) responsive /// locus:dao-6 /// locus:pqm-96	---	---	integral to membrane	-7.73
173230_s_at	snf-5	Sodium:Neurotransmitter symporter Family /// locus:snf-5	transport /// neurotransmitter transport	neurotransmitter:sodium symporter activity /// symporter activity	integral to plasma membrane /// membrane /// integral to membrane	1.99
173238_s_at	cpt-4	Carnitine Palmitoyl Transferase /// locus:cpt-4	proteolysis	cysteine-type endopeptidase activity /// acyltransferase activity /// transferase activity	---	-4.68
173257_s_at	---	---	---	---	---	-1.89
173258_s_at	F25H2.6	PH domain	multicellular organismal development /// nervous system development /// cell differentiation	receptor activity	membrane /// integral to membrane	1.89
173271_s_at	sym-5	SYnthetic lethal with Mec /// locus:sym-5	embryonic development ending in birth or egg hatching /// embryonic development ending in birth or egg hatching /// positive regulation of growth rate /// locomotion /// positive regulation of multicellular organism growth	protein binding	integral to membrane	2.48
173277_at	---	---	---	---	---	2.3
173287_s_at	hex-1	HEXosaminidase /// locus:hex-1	carbohydrate metabolic process /// carbohydrate metabolic process /// metabolic process	catalytic activity /// beta-N-acetylhexosaminidase activity /// beta-N-acetylhexosaminidase activity /// hydrolase activity /// hydrolase activity, acting on glycosyl bonds /// cation binding	lysosome	-1.84
173296_at	dig-1	DIsplaced Gonad	phosphate metabolic process /// cell adhesion /// multicellular organismal development /// nervous system development /// gonad development /// hermaphrodite genitalia development	magnesium ion binding /// inorganic diphosphatase activity /// copper ion binding /// calcium ion binding /// protein binding /// electron carrier activity	extracellular region /// proteinaceous extracellular matrix /// cytoplasm	3.14
173301_s_at	gei-7	GEX Interacting protein	glyoxylate cycle /// tricarboxylic acid cycle /// metabolic process /// determination of adult life span /// determination of adult life span /// carboxylic acid metabolic process	catalytic activity /// isocitrate lyase activity /// malate synthase activity /// transferase activity /// lyase activity	---	3.15
173304_at	Y48B6A.6	hypothetical protein	---	calcium ion binding	---	-2.02
173310_at	Y51F10.7	status:Confirmed /// hypothetical protein	---	---	---	2.2
173312_s_at	K08A2.1	hypothetical protein /// status:Confirmed	---	---	---	-2.47
173335_s_at	dod-3	Downstream Of DAF-16 (regulated by DAF-16) /// locus:dod-3	determination of adult life span	---	integral to membrane	-2.03
173348_s_at	cpg-9	Chondroitin ProteoGlycan /// locus:cpg-9	---	---	---	1.89
173398_s_at	cnc-7	CaeNaCin (Caenorhabditis bacteriocin) /// locus:cnc-7	---	---	integral to membrane	-9.75
173423_at	unc-43	UNCoordinated	protein amino acid phosphorylation /// defense response /// locomotion /// positive regulation of locomotion /// positive regulation of multicellular organism growth	protein kinase activity /// protein serine/threonine kinase activity /// calmodulin-dependent protein kinase activity /// protein tyrosine kinase activity /// protein binding /// calmodulin binding /// ATP binding /// kinase activity	calcium- and calmodulin-dependent protein kinase complex	-1.98
173451_s_at	gly-7	GLYcosylation related /// locus:gly-7	---	calcium ion binding /// sugar binding /// transferase activity /// transferase activity, transferring glycosyl groups /// manganese ion binding	Golgi membrane /// Golgi apparatus /// membrane /// integral to membrane	2
173472_s_at	Y57A10C.6	3-keto-acyl-CoA thiolase /// hypothetical protein	metabolic process	catalytic activity /// protein binding	---	2.06
173480_s_at	cyp-32B1	CYtochrome P450 family /// locus:cyp-32B1	---	monooxygenase activity /// iron ion binding /// electron carrier activity /// heme binding	---	-2.02
173488_at	T05E7.5	hypothetical protein /// status:Partially_confirmed	---	---	---	-1.94
173489_at	sdz-14	SKN-1 Dependent Zygotic transcript /// locus:sdz-14	---	---	---	-2.47
173491_s_at	F58H7.2	hypothetical protein /// status:Partially_confirmed	---	carbon-nitrogen ligase activity, with glutamine as amido-N-donor	---	-2.33
173537_at	B0361.9	hypothetical protein /// status:Confirmed	positive regulation of growth rate	---	---	-1.9
173553_s_at	che-11	abnormal CHEmotaxis /// locus:che-11	hyperosmotic response /// response to oxidative stress /// determination of adult life span /// response to heat /// dauer entry	---	---	1.96
173556_s_at	C06A8.1	hypothetical protein	methionine metabolic process /// positive regulation of growth rate /// oxidation reduction	methylenetetrahydrofolate reductase (NADPH) activity /// protein binding /// oxidoreductase activity	---	1.95
173568_at	C27A12.6	hypothetical protein /// status:Partially_confirmed	---	zinc ion binding	---	-2.07
173571_s_at	oac-50	O-ACyltransferase homolog /// locus:oac-50	---	---	integral to membrane	-2.53
173576_at	ZK180.5	hypothetical protein	---	---	---	1.81
173609_at	Y39B6A.1	status:Confirmed /// hypothetical protein	---	protein binding	---	3.02
173635_at	dpy-6	DumPY : shorter than wild-type /// locus:dpy-6	body morphogenesis /// positive regulation of multicellular organism growth	---	---	3.13
173669_s_at	K10B3.6	hypothetical protein	carbohydrate metabolic process /// glycerol metabolic process /// lipid metabolic process	catalytic activity /// phosphoric diester hydrolase activity /// glycerophosphodiester phosphodiesterase activity /// carbohydrate binding	integral to membrane	1.84
173687_s_at	R11A5.3	hypothetical protein /// status:Confirmed	---	---	---	-3.17
173688_s_at	T22B7.7	hypothetical protein /// status:Confirmed	---	---	---	-3.17
173689_s_at	lpd-6	LiPid Depleted /// locus:lpd-6	reproduction /// nematode larval development /// lipid metabolic process /// embryonic development ending in birth or egg hatching /// sequestering of lipid /// growth /// positive regulation of growth rate	---	integral to membrane	1.96
173720_at	ced-1	CEll Death abnormality	defense response /// engulfment of apoptotic cell /// recognition of apoptotic cell	---	integral to membrane	-1.83
173729_at	T22F3.11	hypothetical protein	transport	transporter activity	integral to membrane	95.14
173756_at	T27E4.7	hypothetical protein /// status:Confirmed	---	---	---	-1.85
173757_s_at	T27E4.7	hypothetical protein /// status:Confirmed	---	---	---	-1.97
173760_s_at	lrp-2	Low-density lipoprotein Receptor Related /// locus:lrp-2	cell migration	receptor activity	membrane /// integral to membrane	1.96
173769_s_at	---	---	---	---	---	-3.19
173787_at	Y47G7B.2	status:Partially_confirmed /// hypothetical protein	---	---	integral to membrane	-3.39
173825_at	T21B6.3	f-spondin like protein	---	protein binding	---	1.83
173827_at	unc-68	UNCoordinated /// locus:unc-68	ion transport /// calcium ion transport /// cellular calcium ion homeostasis /// coenzyme A metabolic process /// locomotion /// positive regulation of non-apoptotic programmed cell death	hydroxymethylglutaryl-CoA reductase (NADPH) activity /// ion channel activity /// ryanodine-sensitive calcium-release channel activity /// calcium channel activity /// calcium ion binding /// coenzyme binding	membrane /// integral to membrane	2.41
173828_s_at	unc-68	UNCoordinated /// locus:unc-68	ion transport /// calcium ion transport /// cellular calcium ion homeostasis /// coenzyme A metabolic process /// locomotion /// positive regulation of non-apoptotic programmed cell death	hydroxymethylglutaryl-CoA reductase (NADPH) activity /// ion channel activity /// ryanodine-sensitive calcium-release channel activity /// calcium channel activity /// calcium ion binding /// coenzyme binding	membrane /// integral to membrane	3.08
173840_s_at	clec-13	C-type LECtin /// C-type LECtin /// locus:clec-13 /// locus:clec-15	positive regulation of growth rate	binding	integral to membrane	-3.86
173840_s_at	clec-15	C-type LECtin /// C-type LECtin /// locus:clec-13 /// locus:clec-15	positive regulation of growth rate	binding	integral to membrane	-3.86
173886_at	Y45G5AM.9	hypothetical protein	---	---	---	-1.89
173897_at	ceh-37	Homeobox /// locus:ceh-37	telomere maintenance /// cell fate specification /// regulation of transcription, DNA-dependent /// regulation of transcription from RNA polymerase II promoter /// multicellular organismal development /// regulation of transcription /// neuron fate specification	DNA binding /// transcription factor activity /// transcription regulator activity /// sequence-specific DNA binding	chromosome, telomeric region /// nucleus /// chromosome	-2.11
173900_s_at	B0331.2	phosphate permease like	phosphate transport	inorganic phosphate transmembrane transporter activity	membrane /// integral to membrane	-2.52
173902_s_at	---	---	---	---	---	-2.66
173938_s_at	gst-20	Glutathione S-Transferase /// locus:gst-20	---	---	---	-3.05
173948_s_at	dct-17	DAF-16/FOXO Controlled, germline Tumor affecting	phosphate metabolic process	magnesium ion binding /// inorganic diphosphatase activity	cytoplasm	1.91
174007_s_at	Monooxygenase	Monooxygenase	metabolic process	monooxygenase activity /// oxidoreductase activity	---	-2.02
174019_s_at	nhr-92	Nuclear Hormone Receptor family /// locus:nhr-92	transcription /// regulation of transcription, DNA-dependent	DNA binding /// transcription factor activity /// steroid hormone receptor activity /// receptor activity /// zinc ion binding /// sequence-specific DNA binding /// metal ion binding	nucleus	-1.81
174033_at	unc-44	UNCoordinated family member (unc-44) (unc-44)	carbohydrate metabolic process /// signal transduction /// body morphogenesis /// positive regulation of growth rate /// locomotion /// positive regulation of locomotion /// positive regulation of multicellular organism growth	hydrolase activity, hydrolyzing O-glycosyl compounds /// protein binding /// protein binding	---	1.89
174057_s_at	W08A12.1	hypothetical protein	---	---	---	-2.25
174058_s_at	C16C8.19	hypothetical protein /// status:Partially_confirmed	---	---	---	-1.89
174060_at	M02E1.2	hypothetical protein /// status:Confirmed	---	---	integral to membrane	-3.14
174063_at	H12I13.5	hypothetical protein /// status:Confirmed	---	---	---	-2.22
174077_at	C05D9.9	hypothetical protein	---	---	---	-1.93
174079_at	C54C8.12	hypothetical protein /// status:Partially_confirmed	---	---	---	-2.6
174086_s_at	T21D12.9	hypothetical protein	reproduction /// positive regulation of multicellular organism growth	protein binding	integral to membrane	2.04
174088_at	C14F11.7	hypothetical protein /// status:Confirmed	---	---	---	-2.51
174095_at	C05D11.7	hypothetical protein	lipid metabolic process /// metabolic process /// lipid catabolic process	hydrolase activity	integral to membrane	1.84
174109_at	---	---	---	---	---	-1.87
174111_at	snf-3	Sodium:Neurotransmitter symporter Family /// locus:snf-3	transport /// neurotransmitter transport	neurotransmitter:sodium symporter activity /// symporter activity	integral to plasma membrane /// membrane /// integral to membrane	-1.89
174122_s_at	alp-1	ALP/Enigma encoding	determination of adult life span /// locomotion /// pharyngeal pumping	protein binding /// protein binding /// zinc ion binding /// identical protein binding	---	2.09
174149_at	F22E5.17	hypothetical protein /// status:Confirmed	---	protein binding	---	2.01
174173_at	C53C9.2	hypothetical protein /// status:Confirmed	positive regulation of growth rate	---	---	-2.1
174187_s_at	K04D7.4	protein-tyrosine phosphatase	protein amino acid dephosphorylation /// dephosphorylation	phosphoprotein phosphatase activity /// protein tyrosine phosphatase activity /// hydrolase activity /// phosphatase activity	membrane /// integral to membrane	3.16
174192_at	---	---	---	---	---	-1.92
174202_at	flp-19	FMRF-Like Peptide /// locus:flp-19	neuropeptide signaling pathway	---	extracellular region	-3.38
174215_s_at	B0507.8	hypothetical protein /// status:Partially_confirmed	---	---	---	-2.05
174238_at	C18F3.4	C18F3.4	---	---	---	2.43
174248_at	vab-15	Variable ABnormal morphology /// locus:vab-15	reproduction /// transcription /// regulation of transcription, DNA-dependent /// multicellular organismal development /// parturition /// locomotory behavior /// locomotion /// regulation of transcription /// embryonic morphogenesis	DNA binding /// transcription factor activity /// transcription factor activity /// transcription regulator activity /// sequence-specific DNA binding /// sequence-specific DNA binding	nucleus /// nucleus	2.44
174254_at	M03F4.6	hypothetical protein /// status:Confirmed	embryonic development ending in birth or egg hatching /// oviposition /// positive regulation of growth rate /// locomotion /// hermaphrodite genitalia development	---	---	1.84
174265_at	nlp-9	Neuropeptide-Like Protein	neuropeptide signaling pathway	---	---	-1.82
174286_at	alg-1	Argonaute (plant)-Like Gene	nematode larval development /// nematode larval development /// determination of adult life span /// embryonic development /// molting cycle, collagen and cuticulin-based cuticle /// positive regulation of growth rate /// locomotion /// positive regulation of locomotion /// positive regulation of multicellular organism growth /// vulval development /// hermaphrodite genitalia development	nucleic acid binding	---	2.42
174298_s_at	pyp-1	inorganic PYroPhosphatase	reproduction /// nematode larval development /// phosphate metabolic process /// embryonic development ending in birth or egg hatching /// growth /// positive regulation of growth rate	magnesium ion binding /// inorganic diphosphatase activity /// hydrolase activity /// metal ion binding	cytoplasm /// integral to membrane	2.08
174315_at	Y65B4BL.7	status:Partially_confirmed /// hypothetical protein	---	---	integral to membrane	-4.27
174331_at	rgs-6	Regulator of G protein Signaling /// locus:rgs-6	negative regulation of signal transduction	signal transducer activity	---	1.94
174337_at	nac-3	NADC (Na+-coupled dicarboxylate transporter) family	transport /// ion transport /// sodium ion transport /// determination of adult life span	transporter activity /// symporter activity /// sodium ion binding	membrane /// integral to membrane	2.81
174339_at	---	---	---	---	---	2.35
174340_at	Y18H1A.8	status:Partially_confirmed /// hypothetical protein	cell wall modification	pectinesterase activity	cell wall	-2.73
174347_s_at	C49C8.5	hypothetical protein /// status:Confirmed	signal transduction	receptor binding	---	1.81
174355_at	clec-219	C-type LECtin /// locus:clec-219	embryonic development ending in birth or egg hatching	sugar binding	---	-11.42
174362_at	---	---	---	---	---	2.18
174372_s_at	Y102A11A.3	status:Partially_confirmed /// hypothetical protein	reproduction	protein binding	---	2.02
174403_at	egl-46	EGg Laying defective /// locus:egl-46	neuron migration /// nematode larval development /// axon guidance /// positive regulation of growth rate /// cell fate commitment /// neuroblast division	nucleic acid binding /// zinc ion binding	intracellular	2.28
174414_at	---	---	---	---	---	1.83
174416_at	F56F10.4	hypothetical protein /// status:Partially_confirmed	---	---	---	2.33
174446_s_at	dur-1	Dauer Up-Regulated	---	---	---	2.39
174481_at	C45G9.6	hypothetical protein	---	---	---	3.2
174536_s_at	clec-136	C-type LECtin /// locus:clec-136	---	---	---	-7.48
174569_at	---	---	---	---	---	-5.01
174601_s_at	Y61A9LA.10	status:Confirmed /// hypothetical protein	nematode larval development /// embryonic development ending in birth or egg hatching /// growth /// positive regulation of growth rate /// ribosome biogenesis	---	nucleus	2.07
174633_at	ketn-1	KETtiN (Drosophila actin-binding) homolog	positive regulation of growth rate	---	---	1.91
174636_at	---	---	---	---	---	1.88
174639_at	sad-1	Synapses of Amphids Defective	protein amino acid phosphorylation /// axon guidance /// synaptogenesis /// regulation of axon extension /// locomotion /// synaptic vesicle transport	protein kinase activity /// protein serine/threonine kinase activity /// protein tyrosine kinase activity /// ATP binding /// kinase activity	---	1.86
174657_s_at	che-14	abnormal CHEmotaxis /// locus:che-14	proteolysis /// dauer entry	serine-type peptidase activity	membrane /// integral to membrane	1.83
174675_at	acs-2	fatty Acid CoA Synthetase family /// locus:acs-2	metabolic process	catalytic activity	---	5.26
174684_s_at	H43E16.1	A. faecalis PHB depolymerase; zinc finger protein 40	embryonic development ending in birth or egg hatching	---	integral to membrane	2.41
174684_s_at	T19D12.1	A. faecalis PHB depolymerase; zinc finger protein 40	embryonic development ending in birth or egg hatching	---	integral to membrane	2.41
174696_s_at	clec-208	C-type LECtin /// locus:clec-208	reproduction	binding	---	-6.34
174713_at	mrp-5	Multidrug Resistance Protein family	nematode larval development /// transport /// collagen and cuticulin-based cuticle development /// positive regulation of growth rate /// positive regulation of locomotion	nucleotide binding /// ATP binding /// ATPase activity /// nucleoside-triphosphatase activity /// ATPase activity, coupled to transmembrane movement of substances	integral to membrane	2.15
174716_at	B0222.10	hypothetical protein /// status:Partially_confirmed	translation	structural constituent of ribosome	intracellular /// ribosome /// integral to membrane	-5.11
174762_at	B0280.1	hypothetical protein	reproduction /// cell death /// embryonic development ending in birth or egg hatching	catalytic activity /// prenyltransferase activity /// Rab-protein geranylgeranyltransferase activity /// zinc ion binding /// transferase activity /// metal ion binding	---	2.24
174796_at	fasn-1	Fatty Acid SyNthase /// locus:fasn-1	nematode larval development /// metabolic process /// biosynthetic process /// embryonic development ending in birth or egg hatching /// growth /// oxidation reduction	acyl carrier activity /// catalytic activity /// binding /// zinc ion binding /// oxidoreductase activity /// transferase activity /// hydrolase activity, acting on ester bonds /// cofactor binding	---	2.04
174812_at	---	---	reproduction /// one-carbon compound metabolic process /// positive regulation of growth rate /// locomotion /// negative regulation of multicellular organism growth /// positive regulation of multicellular organism growth	nucleotide binding /// magnesium ion binding /// methionine adenosyltransferase activity /// ATP binding /// transferase activity /// potassium ion binding /// metal ion binding /// cobalt ion binding	---	2.24
174819_at	unc-2	UNCoordinated	regulation of neurotransmitter levels /// DNA methylation /// transport /// ion transport /// calcium ion transport /// locomotory behavior /// response to heat /// negative regulation of transforming growth factor beta receptor signaling pathway /// locomotion /// response to starvation	DNA binding /// ion channel activity /// voltage-gated calcium channel activity /// calcium ion binding /// N-methyltransferase activity	voltage-gated calcium channel complex /// membrane /// integral to membrane	3
174824_at	tag-308	Temporarily Assigned Gene name	---	---	---	-2.29
174837_s_at	F21C10.7	hypothetical protein /// status:Partially_confirmed	---	---	---	1.94
174857_at	---	---	---	---	---	-1.85
174878_at	T19D2.1	hypothetical protein /// status:Partially_confirmed	proteolysis	metalloendopeptidase activity	---	2.16
174892_at	lin-66	abnormal cell LINeage /// locus:lin-66	nematode larval development /// locomotion /// positive regulation of locomotion /// hermaphrodite genitalia development	protein binding	---	2.11
174893_at	gld-2	defective in Germ Line Development	reproduction /// morphogenesis of an epithelium /// mRNA processing /// nucleus organization /// meiosis /// multicellular organismal development /// embryonic development ending in birth or egg hatching /// positive regulation of growth rate /// regulation of meiosis /// hermaphrodite genitalia development /// regulation of cell proliferation /// regulation of cell division	polynucleotide adenylyltransferase activity /// protein binding /// transferase activity	cytoplasm	-1.83
174911_at	unc-22	UNCoordinated	translation /// tRNA aminoacylation for protein translation /// protein amino acid phosphorylation /// locomotion	nucleotide binding /// protein kinase activity /// protein serine/threonine kinase activity /// protein tyrosine kinase activity /// aminoacyl-tRNA ligase activity /// ATP binding /// kinase activity /// transferase activity	cytoplasm	2.01
174915_s_at	K07C5.4	yeast protein L8167.9-like	reproduction /// nematode larval development /// embryonic development ending in birth or egg hatching /// growth /// positive regulation of growth rate /// positive regulation of multicellular organism growth /// hermaphrodite genitalia development	---	---	2.43
174920_at	Y57G11C.37	status:Partially_confirmed /// hypothetical protein	---	---	integral to membrane	2.49
174932_at	---	---	---	---	---	-1.84
174962_at	Y46G5A.15	status:Confirmed /// hypothetical protein	---	protein binding	---	-2.06
174994_at	osm-11	OSMotic avoidance abnormal /// locus:osm-11	morphogenesis of an epithelium /// nematode larval development /// growth /// positive regulation of growth rate /// locomotion /// positive regulation of multicellular organism growth /// negative regulation of vulval development /// hermaphrodite genitalia development	---	---	-2.55
174995_s_at	ptr-6	PaTched Related family /// locus:ptr-6	embryonic development ending in birth or egg hatching /// molting cycle, collagen and cuticulin-based cuticle /// locomotion /// positive regulation of multicellular organism growth	hedgehog receptor activity	membrane /// integral to membrane	2.07
175001_at	klp-8	Kinesin-Like Protein /// locus:klp-8	---	protein binding	---	-2.07
175024_s_at	clec-161	C-type LECtin /// locus:clec-161	---	binding /// sugar binding	extracellular region	-3.69
175061_s_at	T08B6.5	RNA binding protein	---	nucleotide binding /// nucleic acid binding	---	-2.11
175077_s_at	C05D12.3	hypothetical protein	---	---	---	2
175096_at	spp-15	SaPosin-like Protein family /// locus:spp-15	lipid metabolic process	---	---	-1.83
175103_s_at	C34B7.1	hypothetical protein /// status:Partially_confirmed	---	---	---	-2.03
175104_s_at	F08D12.3	hypothetical protein	---	protein binding	---	-3.28
175113_at	Y113G7A.15	status:Confirmed /// hypothetical protein	---	---	---	-2.07
175126_s_at	K08D8.5	hypothetical protein /// status:Confirmed	---	---	---	2.47
175134_at	cutl-29	CUTiclin-Like /// locus:cutl-29	---	---	integral to membrane	3.06
175163_at	prk-2	Pim (mammalian oncogene) Related Kinase /// locus:prk-2	protein amino acid phosphorylation	protein kinase activity /// protein serine/threonine kinase activity /// protein tyrosine kinase activity /// ATP binding	---	-2.21
175166_at	flp-8	FMRF-Like Peptide	neuropeptide signaling pathway	---	---	-2.91
175170_s_at	dod-19	Downstream Of DAF-16 (regulated by DAF-16) /// locus:dod-19	determination of adult life span	---	---	1.98
175187_at	---	---	---	---	---	-1.84
175194_at	ugt-45	UDP-GlucuronosylTransferase /// locus:ugt-45	metabolic process	transferase activity /// transferase activity, transferring glycosyl groups /// transferase activity, transferring hexosyl groups	integral to membrane	2.01
175239_at	F15E11.15	hypothetical protein	positive regulation of growth rate	---	---	1.81
175253_s_at	C01B4.7	hypothetical protein /// status:Predicted /// status:Predicted /// hypothetical protein	transport	transporter activity	integral to membrane	2.82
175257_s_at	T05C3.6	hypothetical protein	metabolic process	catalytic activity	integral to membrane	-1.81
175267_at	C15H9.11	hypothetical protein /// status:Confirmed	---	---	---	-1.96
175284_at	F07A5.4	hypothetical protein /// status:Partially_confirmed	---	---	---	2.24
175300_s_at	C11D9.1	hypothetical protein /// status:Partially_confirmed	regulation of Rho protein signal transduction	Rho guanyl-nucleotide exchange factor activity	intracellular	2.03
175310_s_at	ZK1073.1	status:Confirmed /// hypothetical protein	---	---	---	-2.33
175311_s_at	btb-17	BTB (Broad/complex/Tramtrack/Bric a brac) domain protein /// locus:btb-17	---	protein binding	---	-2.64
175382_at	Y39A1A.9	status:Partially_confirmed /// hypothetical protein	---	---	---	1.81
175383_at	K01B6.3	hypothetical protein /// status:Partially_confirmed	---	---	integral to membrane	-1.84
175406_at	csk-1	C-terminal Src Kinase /// locus:csk-1	nematode larval development /// protein amino acid phosphorylation	nucleotide binding /// protein kinase activity /// protein serine/threonine kinase activity /// protein tyrosine kinase activity /// non-membrane spanning protein tyrosine kinase activity /// protein binding /// ATP binding /// kinase activity /// transferase activity /// phosphoinositide 3-kinase regulator activity	cytoplasm /// phosphoinositide 3-kinase complex	2.57
175415_s_at	T21C9.3	hypothetical protein	sodium ion transport	sodium channel activity	membrane /// integral to membrane	-1.95
175425_at	aat-5	Amino Acid Transporter	transport /// amino acid transport	amino acid transmembrane transporter activity	membrane /// integral to membrane	1.87
175426_s_at	W06B11.1	hypothetical protein /// status:Confirmed	---	---	---	2.18
175432_at	---	---	---	---	---	-1.91
175444_at	C42C1.7	oac-59	---	transferase activity, transferring acyl groups other than amino-acyl groups	---	1.88
175454_at	H18N23.2	hypothetical protein	embryonic development ending in birth or egg hatching	---	---	-2.22
175458_at	K10C2.7	hypothetical protein /// status:Confirmed	---	---	---	2.04
175489_at	F18E3.11	hypothetical protein /// status:Confirmed	---	---	---	-3.07
175508_at	T04B2.5	hypothetical protein /// status:Confirmed	lipid metabolic process /// metabolic process	hydrolase activity	---	-2.24
175510_at	M163.1	hypothetical protein /// status:Confirmed	---	---	---	-1.88
175512_s_at	C12C8.2	hypothetical protein	amino acid metabolic process	catalytic activity /// pyridoxal phosphate binding	---	-1.9
175518_s_at	WBGene00013345	gamma-soluble NSF attachment protein (SNAP-gamma) /// status:Predicted /// hypothetical protein /// hypothetical protein	intracellular protein transport	binding	endoplasmic reticulum /// Golgi apparatus	2.29
175529_s_at	gur-3	GUstatory Receptor family /// locus:gur-3	sensory perception of taste	receptor activity	integral to membrane	2.08
175538_at	C06B8.2	hypothetical protein	---	catalytic activity /// metal ion binding	integral to membrane	4.92
175539_s_at	K06A5.8	hypothetical protein	---	protein binding	---	2.45
175544_at	csnk-1	CaSeiN Kinase /// locus:csnk-1	nematode larval development /// protein amino acid phosphorylation /// embryonic development ending in birth or egg hatching /// body morphogenesis /// oviposition /// positive regulation of growth rate /// locomotion /// positive regulation of multicellular organism growth /// hermaphrodite genitalia development	protein kinase activity /// protein serine/threonine kinase activity /// protein tyrosine kinase activity /// ATP binding	---	-2.02
175553_at	K02G10.3	hypothetical protein /// status:Confirmed	---	---	integral to membrane	1.88
175554_s_at	K02G10.3	hypothetical protein /// status:Confirmed	---	---	integral to membrane	2.11
175560_at	F59E11.7	F59E11.7	---	---	integral to membrane	-3.21
175584_s_at	K05F1.5	hypothetical protein /// status:Partially_confirmed	---	zinc ion binding	intracellular	2.56
175628_at	eat-4	EATing: abnormal pharyngeal pumping /// locus:eat-4	reproduction /// transport /// ion transport /// sodium ion transport /// neurotransmitter transport /// regulation of pharyngeal pumping	transporter activity /// symporter activity /// sodium ion binding	plasma membrane /// membrane /// integral to membrane /// cell junction /// synapse	2.66
175642_s_at	abf-2	AntiBacterial Factor related /// locus:abf-2	---	---	---	-4.46
175657_s_at	bli-3	BLIstered cuticle /// locus:bli-3	nematode larval development /// response to oxidative stress /// embryonic development ending in birth or egg hatching /// body morphogenesis /// molting cycle, collagen and cuticulin-based cuticle /// collagen and cuticulin-based cuticle development /// growth /// locomotion /// hydrogen peroxide catabolic process /// oxidation reduction	peroxidase activity /// iron ion binding /// calcium ion binding /// electron carrier activity /// NAD(P)H oxidase activity /// oxidoreductase activity /// heme binding /// FAD binding	membrane /// integral to membrane	2.05
175660_at	ptl-1	Protein with Tau-Like repeats	negative regulation of microtubule depolymerization	protein binding	---	1.87
175666_s_at	bli-4	BLIstered cuticle	nematode larval development /// proteolysis /// protein-based cuticle development /// embryonic development /// embryonic development ending in birth or egg hatching /// body morphogenesis /// molting cycle, collagen and cuticulin-based cuticle /// collagen and cuticulin-based cuticle development /// growth /// locomotion	serine-type endopeptidase activity /// serine-type endopeptidase activity /// calcium ion binding /// protein binding /// peptidase activity /// serine-type peptidase activity /// hydrolase activity	membrane /// integral to membrane /// integral to membrane	-1.98
175687_at	mai-1	Mitochondrial ATPase Inhibitor family /// locus:mai-1	negative regulation of nucleotide metabolic process	enzyme inhibitor activity	mitochondrion	-2.07
175694_s_at	tra-1	TRAnsformer : XX animals transformed into males	reproduction /// morphogenesis of an epithelium /// multicellular organismal development /// spermatogenesis /// spermatogenesis /// sex determination /// embryonic development ending in birth or egg hatching /// female germ-line sex determination /// female somatic sex determination /// female somatic sex determination /// cell differentiation /// hermaphrodite genitalia development /// positive…	nucleic acid binding /// DNA binding /// protein binding /// protein C-terminus binding /// zinc ion binding /// metal ion binding	intracellular /// nucleus /// nucleus /// cytoplasm /// cytoplasm	1.99
175745_at	ins-1	INSulin related /// locus:ins-1	learning or memory /// negative regulation of insulin receptor signaling pathway /// negative regulation of insulin receptor signaling pathway /// regulation of chemotaxis	hormone activity	extracellular region	-2.17
175777_at	flp-2	FMRF-Like Peptide	nematode larval development /// embryonic development ending in birth or egg hatching /// growth /// positive regulation of growth rate	---	integral to membrane	-2.09
175779_at	pkc-2	Protein Kinase C	protein amino acid phosphorylation /// intracellular signaling cascade	nucleotide binding /// protein kinase activity /// protein serine/threonine kinase activity /// protein kinase C activity /// protein tyrosine kinase activity /// ATP binding /// zinc ion binding /// kinase activity /// transferase activity /// diacylglycerol binding /// metal ion binding	integral to membrane	-1.98
175815_at	Y34F4.2	hypothetical protein	---	---	integral to membrane	-4.1
175817_at	gly-12	GLYcosylation related	protein amino acid N-linked glycosylation /// embryonic development ending in birth or egg hatching	alpha-1,3-mannosylglycoprotein 2-beta-N-acetylglucosaminyltransferase activity /// transferase activity /// transferase activity, transferring glycosyl groups	Golgi membrane /// integral to membrane	1.83
175851_s_at	ZK54.1	hypothetical protein	transport	transporter activity	integral to membrane	2.01
175868_at	nhr-242	Nuclear Hormone Receptor family /// locus:nhr-242	transcription /// regulation of transcription, DNA-dependent	DNA binding /// transcription factor activity /// steroid hormone receptor activity /// receptor activity /// ligand-dependent nuclear receptor activity /// zinc ion binding /// sequence-specific DNA binding /// metal ion binding	nucleus	-2.07
175871_at	---	---	---	---	---	-4.45
175872_at	clec-150	C-type LECtin /// locus:clec-150	---	binding	---	-2.01
175904_s_at	fbxa-152	F-box A protein /// F-box A protein /// locus:fbxa-152 /// locus:fbxa-222	---	---	---	2.01
175904_s_at	fbxa-222	F-box A protein /// F-box A protein /// locus:fbxa-152 /// locus:fbxa-222	---	---	---	2.01
175915_at	F41B4.2	hypothetical protein	oviposition	---	---	-3.53
175953_at	F41G4.8	hypothetical protein /// status:Partially_confirmed	---	---	---	-2.11
175960_s_at	R13A5.9	hypothetical protein /// status:Partially_confirmed	---	---	integral to membrane	1.98
175968_at	Y5H2B.1	status:Partially_confirmed /// hypothetical protein	carbohydrate metabolic process	galactoside 2-alpha-L-fucosyltransferase activity	Golgi apparatus /// membrane /// integral to membrane	-1.82
175983_at	T05A8.7	hypothetical protein /// status:Predicted	---	---	integral to membrane	-2.03
175993_at	gsto-1	Glutathione S-Transferase, Omega class /// locus:gsto-1	morphogenesis of an epithelium /// metabolic process /// embryonic development ending in birth or egg hatching /// oviposition /// positive regulation of growth rate /// locomotion /// hermaphrodite genitalia development	glutathione transferase activity /// transferase activity	cytoplasm	3.23
175995_at	pcp-1	Prolyl Carboxy Peptidase like /// locus:pcp-1	proteolysis	peptidase activity /// serine-type peptidase activity /// hydrolase activity	---	-1.94
176032_s_at	C06E1.9	hypothetical protein /// status:Confirmed	---	---	---	1.98
176044_at	Y41D4B.16	status:Confirmed /// hypothetical protein	---	---	---	2.36
176053_s_at	clec-160	C-type LECtin /// locus:clec-160	---	binding /// sugar binding	---	2.01
176081_at	Y41D4B.6	status:Partially_confirmed /// hypothetical protein	reproduction	---	integral to membrane	-2.61
176082_s_at	Y41D4B.6	status:Partially_confirmed /// hypothetical protein	reproduction	---	integral to membrane	-2.04
176100_at	ZK688.4	status:Partially_confirmed /// hypothetical protein	---	---	integral to membrane	-1.85
176104_at	Y41D4B.17	status:Confirmed /// hypothetical protein	---	---	---	2.17
176133_at	fbxa-63	F-box A protein /// locus:fbxa-63	---	---	---	-1.91
176145_at	K08D12.3	hypothetical protein	reproduction /// nematode larval development /// embryonic development ending in birth or egg hatching /// growth /// locomotion	nucleic acid binding /// zinc ion binding	---	-2.07
176160_at	F09G8.10	hypothetical protein /// status:Confirmed	---	---	---	-2.03
176169_at	fbxa-80	F-box A protein /// locus:fbxa-80	---	---	---	-1.86
176183_at	Y69A2AR.25	status:Predicted /// hypothetical protein	---	---	---	-4.02
176195_at	snt-3	SyNapTotagmin /// locus:snt-3	transport	transporter activity	synaptic vesicle /// membrane	2.19
176212_at	fbxa-151	F-box A protein /// F-box A protein /// locus:fbxa-151 /// locus:fbxa-78	---	---	---	-4.83
176212_at	fbxa-78	F-box A protein /// F-box A protein /// locus:fbxa-151 /// locus:fbxa-78	---	---	---	-4.83
176240_s_at	tufm-1	TU elongation Factor (EF-Tu), Mitochondrial /// locus:tufm-1	reproduction /// nematode larval development /// translational elongation /// embryonic development ending in birth or egg hatching /// growth	translation elongation factor activity /// GTPase activity /// GTP binding	intracellular	2.27
176246_at	Y119C1B.6	status:Partially_confirmed /// hypothetical protein	---	---	---	-2.35
176254_at	K02D10.3	hypothetical protein /// status:Partially_confirmed	---	---	---	1.8
176255_s_at	Y71H2AM.10	status:Partially_confirmed /// hypothetical protein	reproduction	---	integral to membrane	-2.11
176259_at	Y50D4B.3	status:Partially_confirmed /// hypothetical protein	---	---	---	2.37
176269_at	Y69A2AR.27	status:Predicted /// hypothetical protein	---	---	integral to membrane	-2.26
176285_s_at	Y71H2AM.13	status:Confirmed /// hypothetical protein	---	---	---	1.87
176289_s_at	set-2	SET (trithorax/polycomb) domain containing	positive regulation of growth rate	nucleotide binding /// nucleic acid binding /// RNA binding	nucleus	1.98
176309_at	Y105E8A.23	hypothetical protein	reproduction /// transcription /// positive regulation of growth rate	DNA binding /// DNA-directed RNA polymerase activity	---	1.92
176332_s_at	WBGene00021742	status:Partially_confirmed /// status:Partially_confirmed /// hypothetical protein /// hypothetical protein	---	---	integral to membrane	2.83
176356_s_at	mppa-1	Mitochondrial Processing Peptidase Alpha /// locus:mppa-1	proteolysis	catalytic activity /// metalloendopeptidase activity /// zinc ion binding /// metal ion binding	---	2.86
176369_s_at	Y22D7AL.10	status:Confirmed /// hypothetical protein	protein folding /// embryonic development ending in birth or egg hatching	ATP binding	---	2.21
176384_at	H05L03.3	hypothetical protein /// status:Confirmed	---	---	---	-3.93
176389_s_at	ppgn-1	ParaPleGiN AAA protease family /// locus:ppgn-1 /// status:Partially_confirmed /// hypothetical protein	proteolysis /// protein catabolic process	nucleotide binding /// metalloendopeptidase activity /// ATP binding /// peptidase activity /// zinc ion binding /// nucleoside-triphosphatase activity	membrane /// integral to membrane	2
176415_at	Y71G12B.8	status:Partially_confirmed /// hypothetical protein	nematode larval development /// growth /// positive regulation of growth rate	nucleic acid binding /// helicase activity /// ATP binding /// ATP-dependent helicase activity	---	2.18
176421_at	Y40A1A.1	status:Predicted /// hypothetical protein	protein amino acid phosphorylation	protein kinase activity /// ATP binding	---	-1.99
176437_at	C30F12.3	hypothetical protein /// status:Partially_confirmed	---	---	integral to membrane	-1.86
176441_at	Y102A11A.3	status:Partially_confirmed /// hypothetical protein	reproduction	protein binding	---	2.44
176447_at	---	---	---	---	---	-2.27
176453_at	ugt-31	UDP-GlucuronosylTransferase /// locus:ugt-31	metabolic process	transferase activity /// transferase activity, transferring glycosyl groups /// transferase activity, transferring hexosyl groups	integral to membrane	2.83
176491_at	eif-3.I	Eukaryotic Initiation Factor /// locus:eif-3.I	reproduction /// embryonic development ending in birth or egg hatching	translation initiation factor activity	---	2.3
176492_s_at	eif-3.I	Eukaryotic Initiation Factor /// locus:eif-3.I	reproduction /// embryonic development ending in birth or egg hatching	translation initiation factor activity	---	2.23
176503_at	nhr-239	Nuclear Hormone Receptor family /// locus:nhr-239	regulation of transcription, DNA-dependent	DNA binding /// transcription factor activity /// ligand-dependent nuclear receptor activity /// zinc ion binding /// sequence-specific DNA binding	nucleus	-2.3
176542_at	Y74C10AR.2	status:Partially_confirmed /// hypothetical protein	---	---	integral to membrane	-6.08
176547_at	Y71G12B.3	status:Predicted /// hypothetical protein	---	---	integral to membrane	-3.41
176573_s_at	mec-4	MEChanosensory abnormality /// locus:mec-4	transport /// ion transport /// sodium ion transport /// mechanosensory behavior /// cell death /// response to mechanical stimulus /// regulation of non-apoptotic programmed cell death	ion channel activity /// sodium channel activity /// sodium ion binding	membrane /// integral to membrane	1.86
176574_at	rfs-1	Rad-51 (Fifty one) like, Short /// locus:rfs-1	meiotic chromosome segregation	---	---	1.9
176586_s_at	helicase	helicase	reproduction /// morphogenesis of an epithelium /// nematode larval development /// embryonic development ending in birth or egg hatching /// growth /// positive regulation of growth rate /// locomotion /// positive regulation of multicellular organism growth /// hermaphrodite genitalia development	nucleic acid binding /// helicase activity /// ATP binding /// ATP-dependent helicase activity	---	1.81
176607_s_at	Msi3p	Msi3p	reproduction /// morphogenesis of an epithelium /// nematode larval development /// embryonic development ending in birth or egg hatching /// body morphogenesis /// growth /// positive regulation of growth rate /// locomotion /// hermaphrodite genitalia development	nucleotide binding /// ATP binding	---	1.86
176619_s_at	lin-44	abnormal cell LINeage	Wnt receptor signaling pathway, calcium modulating pathway /// multicellular organismal development /// Wnt receptor signaling pathway /// positive regulation of growth rate	signal transducer activity	extracellular region /// proteinaceous extracellular matrix	2.28
176622_s_at	fem-1	FEMinization of XX and XO animals	reproduction /// ubiquitin-dependent protein catabolic process /// multicellular organismal development /// positive regulation of growth rate	protein binding	cytoplasm	2.44
176640_s_at	sdz-25	SKN-1 Dependent Zygotic transcript /// locus:sdz-25	---	---	---	-1.84
176657_at	cit-1.2	CyclIn T	transcription /// regulation of transcription, DNA-dependent	---	---	-2.38
176675_at	F43H9.4	hypothetical protein /// status:Confirmed	---	---	---	-3.12
176696_at	Y66A7A.2	status:Partially_confirmed /// hypothetical protein	tRNA processing /// RNA metabolic process	ribonuclease P activity /// ribonuclease activity	nucleus	-1.85
176697_at	C52E2.4	hypothetical protein /// status:Partially_confirmed	---	---	---	-2.55
176714_at	R13D7.2	hypothetical protein /// status:Confirmed	---	---	---	-2.22
176740_at	M04F3.2	hypothetical protein /// status:Partially_confirmed	---	---	---	2.72
176758_at	Y111B2A.8	status:Partially_confirmed /// hypothetical protein	---	---	---	-2.03
176775_at	K02G10.3	hypothetical protein /// status:Confirmed	---	---	integral to membrane	2.6
176806_at	F45E4.3	hypothetical protein	---	protein binding	---	2.31
176826_at	Y40B10A.2	status:Confirmed /// hypothetical protein	---	O-methyltransferase activity	---	2.43
176831_at	srsx-6	Serpentine Receptor, class SX /// locus:srsx-6	---	receptor activity	integral to membrane	-2.14
176838_at	Y51H7C.10	status:Partially_confirmed /// hypothetical protein	---	---	integral to membrane	-1.94
176847_at	Y54E10BR.1	status:Partially_confirmed /// hypothetical protein	GPI anchor biosynthetic process /// metabolic process	catalytic activity /// sulfuric ester hydrolase activity /// transferase activity	endoplasmic reticulum membrane /// integral to membrane	1.84
176852_at	srsx-5	Serpentine Receptor, class SX /// locus:srsx-5	---	receptor activity	integral to membrane	-1.92
176863_at	ZK616.7	status:Partially_confirmed /// hypothetical protein	protein amino acid dephosphorylation /// dephosphorylation	protein tyrosine phosphatase activity /// phosphatase activity	---	6.64
176880_at	Y57E12AL.4	status:Predicted /// hypothetical protein	---	---	integral to membrane	-1.85
176888_at	cpx-1	ComPleXin (synaptic protein) homolog /// locus:cpx-1	transport /// neurotransmitter transport /// exocytosis	syntaxin binding	cytoplasm	1.85
176890_at	Y23H5B.1	status:Predicted /// hypothetical protein	---	---	integral to membrane	-1.92
176922_s_at	E03G2.1	hypothetical protein /// status:Predicted	---	---	---	3.14
176938_at	Y48G9A.12	status:Predicted /// hypothetical protein	---	---	---	-1.91
176939_at	spp-23	SaPosin-like Protein family /// locus:spp-23	---	---	---	3.83
176955_at	ech-7	Enoyl-CoA Hydratase /// locus:ech-7	metabolic process	catalytic activity	---	2.37
176959_at	Y105E8A.10	hypothetical protein	sphingolipid metabolic process /// glucosylceramide catabolic process	catalytic activity /// glucosylceramidase activity	membrane /// integral to membrane	1.82
176973_s_at	M7.9	hypothetical protein /// status:Partially_confirmed	---	---	---	-16.84
177024_at	col-90	COLlagen /// locus:col-90	body morphogenesis	structural constituent of cuticle	integral to membrane	2.25
177031_at	---	---	---	---	---	1.88
177051_at	mif-4	MIF (macrophage migration inhibitory factor) related /// locus:mif-4	---	---	---	2.7
177059_at	clec-72	C-type LECtin /// locus:clec-72	---	binding /// sugar binding	---	-1.95
177060_s_at	clec-72	C-type LECtin /// locus:clec-72	---	binding /// sugar binding	---	-3.42
177063_at	Y94H6A.2	status:Partially_confirmed /// hypothetical protein	---	---	---	-2.3
177065_at	vit-1	VITellogenin structural genes (yolk protein genes) /// locus:vit-1	lipid transport	lipid transporter activity /// nutrient reservoir activity	extracellular region	2.6
177066_at	WBGene00021321	status:Confirmed /// status:Confirmed /// hypothetical protein /// hypothetical protein	---	---	---	-2.18
177067_s_at	Y34B4A.5	status:Confirmed /// hypothetical protein	---	---	---	-2.23
177070_s_at	vha-16	Vacuolar H ATPase /// locus:vha-16	reproduction /// nematode larval development /// ATP synthesis coupled proton transport /// growth	hydrogen ion transmembrane transporter activity /// proton-transporting ATPase activity, rotational mechanism	proton-transporting two-sector ATPase complex /// proton-transporting two-sector ATPase complex, proton-transporting domain /// proton-transporting V-type ATPase, V0 domain	1.82
177081_at	Y55F3BR.1	status:Partially_confirmed /// hypothetical protein	reproduction /// positive regulation of growth rate /// locomotion	nucleic acid binding /// helicase activity /// ATP binding /// ATP-dependent helicase activity	---	1.87
177087_at	Y19D10B.2	status:Predicted /// hypothetical protein	---	---	membrane	-1.87
177104_at	clec-70	C-type LECtin /// locus:clec-70	---	binding /// sugar binding	---	-4.7
177115_at	M28.10	hypothetical protein /// status:Confirmed	---	---	---	2.59
177116_at	M7.12	hypothetical protein /// status:Partially_confirmed	---	---	---	2.39
177124_at	Y19D10B.6	status:Partially_confirmed /// hypothetical protein	proteolysis	metalloendopeptidase activity	membrane	1.91
177131_s_at	F15E11.13	hypothetical protein /// status:Partially_confirmed /// status:Partially_confirmed /// hypothetical protein	---	---	---	-1.95
177148_s_at	gcy-28	Guanylyl CYclase	protein amino acid phosphorylation /// intracellular signaling cascade /// cyclic nucleotide biosynthetic process	guanylate cyclase activity /// protein kinase activity /// protein serine/threonine kinase activity /// protein tyrosine kinase activity /// ATP binding /// peptide receptor activity, G-protein coupled /// phosphorus-oxygen lyase activity	membrane /// integral to membrane	1.86
177157_at	R53.8	hypothetical protein /// status:Partially_confirmed	---	---	integral to membrane	-2.55
177167_at	Y38C1AA.9	status:Partially_confirmed /// hypothetical protein	---	---	---	2.2
177170_at	ifc-2	Intermediate Filament, C	morphogenesis of an epithelium /// determination of adult life span /// body morphogenesis /// molting cycle, collagen and cuticulin-based cuticle /// collagen and cuticulin-based cuticle development /// positive regulation of growth rate /// locomotion /// positive regulation of multicellular organism growth	structural molecule activity /// protein binding	cytoplasm /// intermediate filament	-2.03
177179_at	sos-1	Drosophila SOS homolog /// locus:sos-1	small GTPase mediated signal transduction /// female gamete generation /// embryonic development /// embryonic development ending in birth or egg hatching /// body morphogenesis /// cell migration /// oviposition /// regulation of Rho protein signal transduction /// positive regulation of growth rate /// positive regulation of vulval development /// regulation of small GTPase mediated signal tran…	DNA binding /// guanyl-nucleotide exchange factor activity /// Rho guanyl-nucleotide exchange factor activity	intracellular	-1.94
177183_s_at	Y73B6BL.24	locus:acp-6 /// hypothetical protein	---	acid phosphatase activity	---	2.24
177193_s_at	abu-1	Activated in Blocked Unfolded protein response /// Prion-like-(Q/N-rich)-domain-bearing protein /// locus:abu-1 /// locus:pqn-2	---	protein binding	---	-2.34
177193_s_at	pqn-2	Activated in Blocked Unfolded protein response /// Prion-like-(Q/N-rich)-domain-bearing protein /// locus:abu-1 /// locus:pqn-2	---	protein binding	---	-2.34
177219_at	M28.8	hypothetical protein /// status:Partially_confirmed	---	---	integral to membrane	3.67
177224_at	mfb-1	MAFBx (F-box protein) homolog /// locus:mfb-1	proteolysis /// dauer entry	aspartic-type endopeptidase activity /// protein binding	---	1.94
177235_s_at	DH11.2	hypothetical protein /// status:Partially_confirmed	---	---	---	2.23
177257_at	clec-258	C-type LECtin /// locus:clec-258	---	binding	---	-2.49
177342_at	Y37E11AL.5	status:Partially_confirmed /// hypothetical protein	neuropeptide signaling pathway	---	membrane /// integral to membrane	-1.82
177353_s_at	clec-190	C-type LECtin /// locus:clec-190	---	binding	---	5.74
177373_s_at	JC8.11 T23B5.1	hypothetical protein /// hypothetical protein	---	---	---	1.88
177390_at	ZC53.4	status:Predicted /// hypothetical protein	---	---	integral to membrane	-2.63
177414_at	F58D5.5	hypothetical protein /// status:Partially_confirmed	---	---	---	-1.83
177416_at	sru-40	Serpentine Receptor, class U /// locus:sru-40	---	---	integral to membrane	-3.66
177428_at	F58G6.3	hypothetical protein /// hypothetical protein /// status:Predicted /// status:Confirmed	copper ion transport	copper ion transmembrane transporter activity	integral to membrane	4.54
177428_at	F58G6.7	hypothetical protein /// hypothetical protein /// status:Predicted /// status:Confirmed	copper ion transport	copper ion transmembrane transporter activity	integral to membrane	4.54
177437_at	K02E2.7	hypothetical protein /// status:Partially_confirmed	---	---	---	-2.49
177439_s_at	F58D5.2	hypothetical protein	---	---	integral to membrane	-2.69
177463_at	dod-19	Downstream Of DAF-16 (regulated by DAF-16) /// locus:dod-19	determination of adult life span	---	---	3.99
177467_at	ZC53.1	status:Partially_confirmed /// hypothetical protein	---	---	---	-1.93
177478_at	D1086.2	hypothetical protein	---	---	---	-2.67
177485_s_at	man(9)-alpha-mannosidase	man(9)-alpha-mannosidase	---	mannosyl-oligosaccharide 1,2-alpha-mannosidase activity /// calcium ion binding	membrane	1.89
177487_at	C29F3.7	hypothetical protein	positive regulation of growth rate	---	---	-2.16
177496_at	D1086.1	hypothetical protein /// status:Confirmed	---	---	---	-5.17
177502_at	ZC13.2	status:Confirmed /// hypothetical protein	---	---	integral to membrane	1.85
177521_at	F58E6.6	hypothetical protein /// status:Partially_confirmed	---	---	integral to membrane	-1.9
177544_at	F58E6.7	hypothetical protein /// status:Confirmed	---	---	integral to membrane	10.23
177559_at	srz-104	Serpentine Receptor, class Z /// locus:srz-104	---	---	integral to membrane	-2.15
177564_at	F02E9.9	hypothetical protein	proteolysis	dipeptidyl-peptidase activity	cytoplasm	1.89
177579_at	K03D3.5	hypothetical protein /// status:Partially_confirmed	---	---	---	-14.93
177640_at	F58D5.3	hypothetical protein /// status:Confirmed	---	---	integral to membrane	-3.02
177641_at	F36G9.7	hypothetical protein /// status:Predicted	---	---	integral to membrane	-6.03
177647_s_at	T06E4.8	hypothetical protein /// status:Partially_confirmed	---	---	integral to membrane	-2.32
177665_at	Y69H2.7	status:Partially_confirmed /// hypothetical protein	---	protein binding	---	-1.96
177672_at	T23F6.5	hypothetical protein /// status:Partially_confirmed	---	---	---	-2.25
177680_at	ZK896.5	status:Partially_confirmed /// hypothetical protein	---	---	---	3.2
177681_s_at	ZK896.5	status:Partially_confirmed /// hypothetical protein	---	---	---	2.45
177690_at	ZK593.2	status:Partially_confirmed /// hypothetical protein	---	---	---	-2.76
177707_at	F41E7.1	hypothetical protein /// status:Partially_confirmed	morphogenesis of an epithelium /// regulation of pH /// molting cycle, collagen and cuticulin-based cuticle /// locomotion	solute:hydrogen antiporter activity	integral to membrane	-1.87
177716_at	C06C3.4	hypothetical protein /// status:Partially_confirmed	---	---	---	-2.63
177720_at	T24D5.5	hypothetical protein /// status:Predicted	---	---	---	-2.08
177726_at	K01G5.9	hypothetical protein /// status:Confirmed	---	hydrolase activity	---	2.02
177728_at	C26C6.4	hypothetical protein	---	---	integral to membrane	-2
177747_at	srm-3	Serpentine Receptor, class M /// locus:srm-3	copper ion transport	copper ion transmembrane transporter activity	integral to membrane	7.56
177765_at	C01A2.1	hypothetical protein /// status:Partially_confirmed	positive regulation of growth rate	---	---	-1.81
177777_at	C04G2.9	hypothetical protein /// status:Confirmed	---	---	---	2.09
177783_at	ZK6.11	hypothetical protein	---	---	---	3.72
177784_at	F07C6.3	hypothetical protein /// status:Partially_confirmed	---	---	---	-2
177799_at	Y7A5A.2	status:Confirmed /// hypothetical protein	---	protein binding	---	-1.92
177801_at	clec-230	C-type LECtin /// locus:clec-230	---	binding	---	2.51
177808_at	R11H6.4	hypothetical protein /// status:Confirmed	---	---	---	-2.26
177812_at	F10C2.7	hypothetical protein /// status:Partially_confirmed	transport	transporter activity	integral to membrane	2.03
177814_s_at	T11B7.5	hypothetical protein /// status:Confirmed	---	---	---	-2.47
177816_at	F49H6.3	hypothetical protein /// status:Predicted	---	---	integral to membrane	-4.37
177828_at	F02H6.4	hypothetical protein /// status:Predicted	---	---	---	1.95
177829_at	lips-10	LIPaSe related /// locus:lips-10	embryonic development ending in birth or egg hatching	---	---	1.92
177860_at	sri-6	Serpentine Receptor, class I /// locus:sri-6	---	---	integral to membrane	-2.4
177899_at	T03D8.7	hypothetical protein /// status:Partially_confirmed	---	---	---	-2.31
177903_s_at	oac-14	O-ACyltransferase homolog /// locus:oac-14	positive regulation of growth rate	transferase activity, transferring acyl groups other than amino-acyl groups	integral to membrane	5.64
177920_at	D1086.3	hypothetical protein /// status:Confirmed	---	---	---	-2.45
177929_s_at	---	---	---	---	---	2.01
177930_at	Y7A5A.6	status:Predicted /// hypothetical protein	---	---	---	-1.84
177952_s_at	K02E2.6	hypothetical protein /// status:Confirmed	proteolysis	aspartic-type endopeptidase activity	---	-2.63
177958_at	F36D1.7	hypothetical protein /// status:Confirmed	---	---	---	-2.19
177961_at	F54F7.2	hypothetical protein /// status:Partially_confirmed	---	---	---	-2.81
178000_at	srh-63	Serpentine Receptor, class H /// locus:srh-63	---	---	integral to membrane	-2.22
178016_at	srab-26	Serpentine Receptor, class AB (class A-like)	---	---	integral to membrane	-1.91
178017_s_at	F01D5.1	hypothetical protein /// status:Confirmed	---	protein binding	---	-2.15
178029_at	C07E3.6	hypothetical protein /// status:Partially_confirmed	regulation of transcription, DNA-dependent /// regulation of transcription	DNA binding /// transcription factor activity /// sequence-specific DNA binding	nucleus	-2.03
178043_at	sqrd-1	Sulfide Quinone oxidoReDuctase /// locus:sqrd-1	oxidation reduction	oxidoreductase activity	---	-2.54
178052_at	T23F6.3	hypothetical protein /// status:Confirmed	---	protein binding /// zinc ion binding	---	-2.09
178065_at	T21H8.1	hypothetical protein	---	---	---	-1.81
178073_s_at	F28H7.6	hypothetical protein /// status:Partially_confirmed	---	---	membrane /// integral to membrane	1.89
178087_s_at	lys-5	LYSozyme /// LYSozyme /// locus:lys-5 /// locus:lys-6	carbohydrate metabolic process /// peptidoglycan catabolic process /// cell wall catabolic process	lysozyme activity /// catalytic activity /// cation binding	---	4.63
178087_s_at	lys-6	LYSozyme /// LYSozyme /// locus:lys-5 /// locus:lys-6	carbohydrate metabolic process /// peptidoglycan catabolic process /// cell wall catabolic process	lysozyme activity /// catalytic activity /// cation binding	---	4.63
178098_at	C05G5.2	hypothetical protein /// status:Partially_confirmed	---	---	---	-1.96
178099_at	F56H6.4	hypothetical protein /// status:Predicted	---	---	---	-2.26
178101_at	F59F5.1	hypothetical protein /// status:Partially_confirmed	---	---	integral to membrane	2.25
178107_at	ZK652.6	hypothetical protein	---	DNA binding /// protein binding /// zinc ion binding /// metal ion binding	intracellular /// nucleus	1.94
178118_at	fbxa-185	F-box A protein /// locus:fbxa-185	---	---	---	-3.93
178121_at	srw-31	Serpentine Receptor, class W /// locus:srw-31	---	---	integral to membrane	-1.97
178148_at	fbxa-187	F-box A protein /// locus:fbxa-187	---	---	---	-1.86
178149_s_at	spp-1	SaPosin-like Protein family /// locus:spp-1	determination of adult life span	---	---	-2.06
178166_at	srg-46	Serpentine Receptor, class G (gamma) /// locus:srg-46	signal transduction /// sensory perception of chemical stimulus	transmembrane receptor activity	membrane /// integral to membrane	-1.86
178168_at	T01G9.1	hypothetical protein /// status:Partially_confirmed	---	---	integral to membrane	1.98
178217_at	sra-14	Serpentine Receptor, class A (alpha) /// locus:sra-14	sensory perception of chemical stimulus	transmembrane receptor activity	integral to membrane	-1.87
178218_at	K10D6.3	hypothetical protein /// status:Partially_confirmed	---	---	---	2.03
178233_at	F49H6.5	hypothetical protein /// status:Partially_confirmed	Mo-molybdopterin cofactor biosynthetic process /// metabolic process /// positive regulation of growth rate	catalytic activity /// metal ion binding /// iron-sulfur cluster binding /// 4 iron, 4 sulfur cluster binding	molybdopterin synthase complex	-2.29
178240_at	WBGene00014090	status:Confirmed /// status:Partially_confirmed /// hypothetical protein /// hypothetical protein	---	---	---	-1.83
178250_at	M01E5.1	hypothetical protein /// status:Predicted	---	---	integral to membrane	-2
178253_at	srh-97	Serpentine Receptor, class H /// locus:srh-97	---	---	integral to membrane	-1.83
178259_at	F36A2.3	hypothetical protein /// status:Confirmed	metabolic process /// oviposition /// locomotion	oxidoreductase activity	---	2.68
178290_at	grl-3	GRound-Like (grd related) /// locus:grl-3	---	---	---	-2.35
178295_at	F47H4.2	hypothetical protein	---	---	---	-4.26
178297_at	T24B8.5	hypothetical protein /// status:Confirmed	---	---	---	-2.37
178298_at	F13A7.7	hypothetical protein /// status:Partially_confirmed	---	---	---	-1.94
178312_at	T27C5.8	hypothetical protein /// status:Partially_confirmed	---	---	integral to membrane	-6.38
178315_at	K08C7.7	hypothetical protein /// status:Partially_confirmed	---	---	---	-2.09
178322_at	ZK856.5	status:Partially_confirmed /// hypothetical protein	---	hydrolase activity	---	-2
178327_s_at	acl-5	ACyLtransferase-like	metabolic process	acyltransferase activity	integral to membrane	2.35
178333_at	K03H4.2	hypothetical protein /// status:Partially_confirmed	body morphogenesis	---	---	-2.12
178358_at	F35G2.3	hypothetical protein /// status:Partially_confirmed	---	---	integral to membrane	2.08
178372_at	ZK829.3	status:Partially_confirmed /// hypothetical protein	---	---	integral to membrane	-2.24
178375_at	D1053.2	hypothetical protein /// status:Partially_confirmed	chromatin modification	histone-lysine N-methyltransferase activity	nucleus	-2.15
178405_at	C05G5.1	hypothetical protein /// status:Partially_confirmed	---	---	integral to membrane	1.89
178409_s_at	lys-6	LYSozyme /// locus:lys-6	carbohydrate metabolic process /// peptidoglycan catabolic process /// cell wall catabolic process	lysozyme activity /// catalytic activity /// cation binding	---	4.03
178419_at	srw-33	Serpentine Receptor, class W /// locus:srw-33	G-protein coupled receptor protein signaling pathway /// hermaphrodite genitalia development	---	integral to membrane	-2.23
178434_at	F57G4.1	hypothetical protein /// status:Predicted	---	---	integral to membrane	-1.89
178435_at	C17H1.7	hypothetical protein /// status:Partially_confirmed	---	---	---	-3
178448_at	C03D6.1	hypothetical protein /// status:Partially_confirmed	reproduction /// nematode larval development /// embryonic development ending in birth or egg hatching /// body morphogenesis /// growth /// positive regulation of growth rate /// hermaphrodite genitalia development	---	---	-2.14
178468_at	srd-70	Serpentine Receptor, class D (delta) /// locus:srd-70	---	---	integral to membrane	-1.9
178487_at	ZC482.7	status:Predicted /// hypothetical protein	---	---	membrane /// integral to membrane	-2.06
178503_at	W02D9.6	hypothetical protein /// status:Confirmed	---	---	---	-2.52
178532_at	str-261	Seven TM Receptor /// locus:str-261	---	---	integral to membrane	-1.93
178550_at	C33G3.5	hypothetical protein /// status:Partially_confirmed	---	---	---	-2.31
178571_s_at	fipr-22	FIP (Fungus-Induced Protein) Related /// FIP (Fungus-Induced Protein) Related /// locus:fipr-22 /// locus:fipr-23	---	---	integral to membrane	2
178571_s_at	fipr-23	FIP (Fungus-Induced Protein) Related /// FIP (Fungus-Induced Protein) Related /// locus:fipr-22 /// locus:fipr-23	---	---	integral to membrane	2
178582_at	C47F8.7	hypothetical protein /// status:Predicted	---	---	---	-3.12
178591_at	grl-17	GRound-Like (grd related) /// locus:grl-17	---	---	---	-2.01
178613_at	F36F2.2	hypothetical protein /// status:Partially_confirmed	---	---	---	-2.14
178614_s_at	F36F2.2	hypothetical protein /// status:Partially_confirmed	---	---	---	-1.99
178636_at	che-13	abnormal CHEmotaxis /// locus:che-13	chemosensory behavior /// protein localization /// cilium assembly /// dauer entry	structural molecule activity	cilium /// microtubule basal body /// cell projection	2.11
178639_at	sru-15	Serpentine Receptor, class U /// locus:sru-15	embryonic development ending in birth or egg hatching	---	integral to membrane	-2.42
178648_s_at	F30F8.1	hypothetical protein /// status:Partially_confirmed	---	---	---	1.96
178651_at	F08G2.5	hypothetical protein /// status:Partially_confirmed	---	protein binding	---	-2.06
178653_at	W06B3.1	hypothetical protein /// status:Partially_confirmed	biosynthetic process /// NAD biosynthetic process	catalytic activity /// nucleotidyltransferase activity	---	2.6
178658_at	C08E8.1	hypothetical protein /// status:Confirmed	---	---	integral to membrane	-1.88
178671_at	---	---	---	---	---	2.27
178672_s_at	C45E1.4	hypothetical protein /// status:Partially_confirmed	---	---	integral to membrane	2.64
178688_s_at	K08D8.3	hypothetical protein /// status:Partially_confirmed	---	---	---	2.52
178695_at	F53B3.6	zinc finger protein	---	---	---	1.89
178711_at	T22G5.1	hypothetical protein /// status:Partially_confirmed	glycerol metabolic process /// lipid metabolic process	phosphoric diester hydrolase activity /// glycerophosphodiester phosphodiesterase activity	integral to membrane	-2.14
178724_s_at	F54D5.3	hypothetical protein /// status:Confirmed	---	---	---	-1.89
178728_at	R01E6.2	hypothetical protein /// status:Partially_confirmed	---	---	---	-2.11
178737_at	K08C7.6	hypothetical protein /// status:Confirmed	---	---	---	-1.92
178742_s_at	F57C2.5	hypothetical protein /// status:Confirmed	biosynthetic process	strictosidine synthase activity	---	1.9
178770_at	C14A4.7	hypothetical protein	---	---	integral to membrane	-1.95
178780_at	C54C8.3	hypothetical protein /// status:Partially_confirmed	protein amino acid glycosylation	galactosyltransferase activity /// transferase activity /// transferase activity, transferring glycosyl groups	Golgi apparatus /// membrane /// integral to membrane	-1.86
178786_s_at	D1081.7	hypothetical protein	---	---	---	2.24
178789_at	F25B3.2	hypothetical protein /// status:Partially_confirmed	---	---	integral to membrane	-1.85
178797_at	C49F5.7	hypothetical protein /// status:Confirmed	---	---	---	-2.94
178799_at	F14D7.7	hypothetical protein /// status:Partially_confirmed /// status:Predicted	---	---	---	-4.04
178809_at	Y6B3B.3	status:Predicted /// hypothetical protein	---	---	integral to membrane	-1.86
178843_at	F08G5.6	hypothetical protein /// status:Confirmed	defense response	---	---	-2.45
178883_at	F19C7.8	hypothetical protein	---	---	---	-1.97
178892_at	fbxa-172	F-box A protein /// locus:fbxa-172	---	---	---	-4.06
178904_s_at	T08G5.9	hypothetical protein /// status:Predicted /// status:Predicted	---	structural molecule activity	---	3.79
178908_at	---	---	---	---	---	-1.81
178923_at	C01H6.3	hypothetical protein /// status:Partially_confirmed	---	---	---	3.15
178927_at	K08D8.5	hypothetical protein /// status:Confirmed	---	---	---	4.76
178961_at	---	---	---	---	---	-4.22
178971_s_at	R10E8.6	hypothetical protein /// status:Partially_confirmed	---	---	---	-1.95
178991_s_at	F21G4.6	hypothetical protein /// status:Partially_confirmed	---	---	---	1.99
178996_at	efn-2	Eph(F)riN /// locus:efn-2	---	---	membrane	2.15
178998_at	Y2H9A.4	status:Partially_confirmed /// hypothetical protein	---	---	integral to membrane	-1.84
179022_at	C50F4.1	hypothetical protein /// status:Partially_confirmed	---	---	---	-1.8
179043_at	C09G9.5	hypothetical protein /// status:Confirmed	---	---	integral to membrane	-1.96
179046_at	F46A9.1	hypothetical protein /// status:Confirmed	---	---	---	-1.87
179066_at	atg-4.2	AuTophaGy (yeast Atg homolog) /// locus:atg-4.2	transport /// autophagy /// protein transport	peptidase activity /// cysteine-type peptidase activity /// hydrolase activity	cytoplasm	1.82
179093_at	T16G1.4	hypothetical protein /// status:Partially_confirmed	---	---	---	3.44
179094_s_at	T16G1.4	hypothetical protein /// status:Partially_confirmed	---	---	---	2.37
179098_at	T19C9.8	hypothetical protein /// status:Partially_confirmed	---	---	---	-2.03
179099_at	fbxb-33	F-box B protein /// locus:fbxb-33	---	---	---	-1.97
179113_at	srh-265	Serpentine Receptor, class H /// locus:srh-265	---	---	integral to membrane	-1.95
179118_at	fbxa-82	F-box A protein	---	---	---	-1.89
179160_at	T26H5.4	hypothetical protein /// status:Partially_confirmed	---	protein binding	---	-1.82
179175_at	T04B2.5	hypothetical protein /// status:Confirmed	lipid metabolic process /// metabolic process	hydrolase activity	---	-2.07
179183_at	fbxa-193	F-box A protein /// locus:fbxa-193	carbohydrate metabolic process	hydrolase activity, hydrolyzing O-glycosyl compounds	---	2.2
179187_s_at	F46F2.3	hypothetical protein /// status:Confirmed	embryonic development ending in birth or egg hatching	---	integral to membrane	2.23
179197_s_at	fbxa-136	F-box A protein	embryonic development ending in birth or egg hatching	calcium ion binding	---	-2.9
179200_at	T28C6.9	hypothetical protein /// status:Partially_confirmed	---	---	---	1.86
179207_at	R06C1.6	hypothetical protein /// status:Partially_confirmed	---	---	---	-1.92
179210_at	T05F1.9	hypothetical protein /// status:Partially_confirmed	---	---	---	3.42
179214_at	F54B8.4	hypothetical protein /// status:Partially_confirmed	---	---	---	-2.28
179219_at	unc-80	UNCoordinated	positive regulation of locomotion /// response to drug	---	---	2.5
179228_at	sdz-27	SKN-1 Dependent Zygotic transcript /// locus:sdz-27	---	---	integral to membrane	-2.05
179235_at	C31H5.5	hypothetical protein /// status:Partially_confirmed	---	---	---	-1.86
179261_at	srh-178	Serpentine Receptor, class H /// locus:srh-178	---	---	integral to membrane	-1.87
179266_at	F15D4.5	hypothetical protein /// status:Partially_confirmed	---	nucleic acid binding /// zinc ion binding	---	-2.44
179268_s_at	F15B9.10	hypothetical protein /// status:Partially_confirmed	---	---	integral to membrane	2.02
179301_at	T26F2.3	hypothetical protein /// status:Partially_confirmed	---	---	---	-2.04
179305_at	ZK455.5	status:Partially_confirmed /// hypothetical protein	---	---	integral to membrane	2.39
179323_s_at	C14A6.2	hypothetical protein /// hypothetical protein /// status:Partially_confirmed /// status:Partially_confirmed	transport	transporter activity	integral to membrane	-1.98
179323_s_at	M162.5	hypothetical protein /// hypothetical protein /// status:Partially_confirmed /// status:Partially_confirmed	transport	transporter activity	integral to membrane	-1.98
179331_at	F11C1.1	hypothetical protein /// status:Confirmed	---	---	---	2.22
179339_s_at	lgc-20	Ligand-Gated ion Channel /// locus:lgc-20	transport /// ion transport	extracellular ligand-gated ion channel activity	membrane /// integral to membrane /// postsynaptic membrane	-2.16
179364_at	F28B1.5	hypothetical protein /// status:Predicted	---	---	---	-2.06
179376_at	K09C8.2	hypothetical protein /// status:Confirmed	---	---	integral to membrane	-2.1
179394_at	T03E6.2	hypothetical protein /// status:Predicted	---	---	integral to membrane	-2
179398_at	F16H6.7	hypothetical protein /// status:Partially_confirmed	---	---	---	2.38
179418_at	Y6E2A.4	status:Partially_confirmed /// hypothetical protein	---	---	---	-2.45
179422_s_at	M04C3.2	hypothetical protein /// status:Partially_confirmed	---	---	---	2.63
179424_at	spp-18	SaPosin-like Protein family /// locus:spp-18	---	---	---	-2.54
179435_at	T04B2.3	hypothetical protein	---	---	---	-1.95
179438_at	ZK662.5	status:Predicted /// hypothetical protein	---	---	---	-2.46
179439_s_at	F11E6.3	hypothetical protein /// status:Confirmed	positive regulation of growth rate	---	---	2.17
179449_at	ZK218.4	status:Partially_confirmed /// hypothetical protein	---	---	integral to membrane	-2.21
179457_at	B0024.4	hypothetical protein /// status:Confirmed	positive regulation of growth rate	---	---	-2.16
179462_at	fipr-6 fipr-7 fipr-8 fipr-9	FIP (Fungus-Induced Protein) Related /// FIP (Fungus-Induced Protein) Related /// FIP (Fungus-Induced Protein) Related /// FIP (Fungus-Induced Protein) Related /// locus:fipr-8 /// locus:fipr-7 /// locus:fipr-6 /// locus:fipr-9	---	---	integral to membrane	2.7
179466_at	srh-55	Serpentine Receptor, class H /// locus:srh-55	---	---	integral to membrane	-1.82
179491_at	ZK669.2	status:Predicted /// hypothetical protein	---	---	---	1.82
179492_at	F47B8.4	hypothetical protein /// status:Partially_confirmed	cell redox homeostasis	electron carrier activity /// protein disulfide oxidoreductase activity	---	-2.89
179493_at	K06A4.2	hypothetical protein /// status:Partially_confirmed	---	---	integral to membrane	-1.81
179496_at	clec-263	C-type LECtin /// locus:clec-263	---	binding	---	-1.87
179502_at	T28D6.3	hypothetical protein /// status:Confirmed	---	---	---	-4.52
179503_at	C18D4.4	hypothetical protein /// status:Partially_confirmed	vitelline membrane formation	structural constituent of vitelline membrane	---	-2.03
179525_at	hrg-4	Heme Responsive Gene	transport	---	plasma membrane /// membrane /// integral to membrane	9.25
179533_at	C06B8.2	hypothetical protein	---	catalytic activity /// metal ion binding	integral to membrane	2.87
179534_s_at	T23F1.5	hypothetical protein /// status:Partially_confirmed	---	---	integral to membrane	-2.28
179538_at	ZK262.9	status:Predicted /// hypothetical protein	---	---	---	-1.83
179539_at	ZK287.1	status:Partially_confirmed /// hypothetical protein	---	---	---	2.54
179540_at	---	---	---	---	---	2.74
179550_at	F28B1.1	hypothetical protein /// status:Predicted	---	---	---	-2.11
179620_s_at	T10G3.3	hypothetical protein /// status:Partially_confirmed	---	---	---	-1.93
179642_at	spp-16	SaPosin-like Protein family /// locus:spp-16	---	---	---	-1.94
179645_s_at	F56A8.8	hypothetical protein /// status:Partially_confirmed	---	---	---	-2.05
179647_s_at	W07G1.7	hypothetical protein /// status:Partially_confirmed	---	---	---	-2.99
179650_at	K08D8.4	hypothetical protein	---	---	---	3.06
179686_at	tag-297	Temporarily Assigned Gene name /// locus:tag-297	nematode larval development /// molting cycle, collagen and cuticulin-based cuticle /// growth /// locomotion	---	---	2.06
179690_at	W02A2.5	hypothetical protein /// hypothetical protein /// status:Predicted /// status:Predicted	translation	structural constituent of ribosome	intracellular /// ribosome /// integral to membrane	-2.07
179690_at	W02A2.9	hypothetical protein /// hypothetical protein /// status:Predicted /// status:Predicted	translation	structural constituent of ribosome	intracellular /// ribosome /// integral to membrane	-2.07
179693_at	F53H2.1	hypothetical protein /// status:Partially_confirmed	positive regulation of growth rate	---	---	-4.43
179695_at	F35E12.5	hypothetical protein /// status:Predicted	---	---	---	-2.49
179702_at	Y62H9A.1	status:Partially_confirmed /// hypothetical protein	---	---	integral to membrane	-1.85
179711_s_at	F17A9.4	hypothetical protein /// status:Confirmed	metabolic process	catalytic activity /// FMN binding /// oxidoreductase activity	---	2.56
179728_at	fbxa-165	F-box A protein /// locus:fbxa-165	---	---	---	-3.14
179738_at	F10D2.12	hypothetical protein /// status:Partially_confirmed	metabolic process	transferase activity /// transferase activity, transferring glycosyl groups /// transferase activity, transferring hexosyl groups	integral to membrane	1.9
179741_at	T11F8.2	hypothetical protein /// status:Partially_confirmed	---	---	integral to membrane	2.28
179768_at	sul-3	SULfatase domain protein	metabolic process	catalytic activity /// sulfuric ester hydrolase activity	---	3.77
179778_at	F27D9.2	hypothetical protein /// status:Confirmed	transport	transporter activity	integral to membrane	3.82
179804_s_at	F49E7.2	hypothetical protein /// status:Partially_confirmed	---	---	integral to membrane	-1.98
179815_at	T23F4.3	hypothetical protein /// status:Partially_confirmed	---	hydrolase activity	---	-2.51
179837_s_at	cdh-3	CaDHerin family /// locus:cdh-3	cell adhesion /// homophilic cell adhesion /// morphogenesis of embryonic epithelium /// tail tip morphogenesis	calcium ion binding /// protein binding	plasma membrane /// membrane /// integral to membrane /// cell junction	2.95
179858_at	C49C8.5	hypothetical protein /// status:Confirmed	signal transduction	receptor binding	---	2.86
179870_at	fbxb-21	F-box B protein /// locus:fbxb-21	---	---	---	-3.13
179871_at	fbxa-54	F-box A protein /// locus:fbxa-54	---	---	---	-1.86
179877_at	fbxa-56	F-box A protein /// locus:fbxa-56	---	---	---	-1.85
179879_at	Y51H4A.5	status:Partially_confirmed /// hypothetical protein	lipid metabolic process	triacylglycerol lipase activity	---	-2.25
179892_at	K06A5.2	hypothetical protein /// status:Confirmed	meiosis /// embryonic development ending in birth or egg hatching	---	integral to membrane	2
179909_at	oac-20	O-ACyltransferase homolog /// locus:oac-20	regulation of transcription, DNA-dependent	transcription factor activity /// transferase activity, transferring acyl groups other than amino-acyl groups /// sequence-specific DNA binding	nucleus /// integral to membrane	2.89
179913_at	E04F6.9	hypothetical protein /// status:Confirmed	---	---	---	-3.3
179914_at	F35E12.8	hypothetical protein /// status:Partially_confirmed	---	---	---	5.08
179915_at	fbxb-101	F-box B protein /// locus:fbxb-101	---	---	---	2.53
179919_at	try-9	TRYpsin-like Protease /// locus:try-9	proteolysis	catalytic activity /// serine-type endopeptidase activity /// peptidase activity	---	-6.19
179933_at	F39E9.1	hypothetical protein /// status:Predicted /// status:Partially_confirmed /// hypothetical protein	---	---	---	-2.59
179939_at	F22E5.6	hypothetical protein /// status:Partially_confirmed	potassium ion transport	voltage-gated potassium channel activity /// protein binding	voltage-gated potassium channel complex /// membrane	1.96
179956_at	B0207.9	hypothetical protein /// status:Partially_confirmed	---	---	integral to membrane	-2.86
179960_at	C07G1.6	hypothetical protein /// status:Partially_confirmed	---	---	---	-1.83
179969_at	btb-15	BTB (Broad/complex/Tramtrack/Bric a brac) domain protein /// locus:btb-15	---	protein binding	---	-2.12
179978_at	abce-1	ABC transporter, class E /// locus:abce-1	reproduction /// nematode larval development /// embryonic development ending in birth or egg hatching /// body morphogenesis /// growth /// positive regulation of growth rate /// locomotion /// hermaphrodite genitalia development	nucleotide binding /// ATP binding /// electron carrier activity /// ATPase activity /// nucleoside-triphosphatase activity /// iron-sulfur cluster binding	---	2.03
179989_at	fbxa-99	F-box A protein /// locus:fbxa-99	---	---	---	-1.93
179991_s_at	hlh-28	Helix Loop Helix /// Helix Loop Helix /// locus:hlh-28 /// locus:hlh-29	morphogenesis of an epithelium /// gonad development /// embryonic development ending in birth or egg hatching /// oviposition /// vulval development /// hermaphrodite genitalia development /// regulation of transcription	transcription regulator activity	nucleus	-1.85
179991_s_at	hlh-29	Helix Loop Helix /// Helix Loop Helix /// locus:hlh-28 /// locus:hlh-29	morphogenesis of an epithelium /// gonad development /// embryonic development ending in birth or egg hatching /// oviposition /// vulval development /// hermaphrodite genitalia development /// regulation of transcription	transcription regulator activity	nucleus	-1.85
179993_at	F35C11.6	hypothetical protein /// status:Partially_confirmed	---	---	---	-1.95
179997_s_at	F09A5.4	hypothetical protein	---	protein binding	integral to membrane	1.9
180020_at	T05E11.7	hypothetical protein /// status:Partially_confirmed	---	---	---	-2.7
180023_at	T05A7.3	hypothetical protein /// status:Partially_confirmed	---	---	---	1.89
180025_at	T02G5.2	hypothetical protein /// status:Partially_confirmed	---	calcium ion binding	---	3.24
180032_at	D2092.4	hypothetical protein /// status:Confirmed	cell redox homeostasis	---	integral to membrane	2.43
180060_at	ZC132.9	status:Partially_confirmed /// hypothetical protein	---	---	integral to membrane	-2.04
180082_at	fbxa-131	F-box A protein /// locus:fbxa-131	---	---	---	-2.2
180089_at	C50F2.8	hypothetical protein /// status:Partially_confirmed	---	protein binding	---	1.95
180100_at	R04E5.9	hypothetical protein /// status:Confirmed	---	---	---	-2.21
180113_at	F07E5.9	hypothetical protein /// status:Predicted	nematode larval development /// metabolic process /// locomotion	oxidoreductase activity	---	-1.91
180118_at	fbxa-170	F-box A protein /// locus:fbxa-170	---	---	---	2.16
180121_at	ZK380.4	status:Predicted /// hypothetical protein	---	---	---	-2.51
180128_at	Y51H4A.8	status:Confirmed /// hypothetical protein	---	protein binding	---	2.69
180138_at	F36G9.13	hypothetical protein /// status:Partially_confirmed	---	---	integral to membrane	-2.07
180159_at	fbxc-7	F-box C protein /// locus:fbxc-7	---	---	---	-1.94
180164_at	fbxc-16	F-box C protein /// locus:fbxc-16	---	---	---	-1.81
180177_at	C49G7.3	hypothetical protein /// status:Confirmed	---	---	---	-1.99
180179_at	K06A5.8	hypothetical protein	---	protein binding	---	1.88
180184_at	T02G5.3	hypothetical protein /// status:Predicted	---	---	integral to membrane	2.11
180207_at	K10C9.4	hypothetical protein /// status:Predicted	---	---	integral to membrane	-1.9
180212_at	C44B7.6	hypothetical protein	---	---	membrane /// integral to membrane	-3.44
180222_at	T23F4.1	hypothetical protein /// status:Predicted	---	hydrolase activity	---	-1.85
180223_s_at	T23F4.1	hypothetical protein /// hypothetical protein /// status:Predicted /// status:Partially_confirmed	---	hydrolase activity	---	-4.3
180223_s_at	T23F4.3	hypothetical protein /// hypothetical protein /// status:Predicted /// status:Partially_confirmed	---	hydrolase activity	---	-4.3
180229_s_at	scl-24	SCP-Like extracellular protein /// SCP-Like extracellular protein /// locus:scl-24 /// locus:scl-25	---	---	extracellular region	-2.34
180229_s_at	scl-25	SCP-Like extracellular protein /// SCP-Like extracellular protein /// locus:scl-24 /// locus:scl-25	---	---	extracellular region	-2.34
180235_at	srt-25	Serpentine Receptor, class T /// locus:srt-25	---	receptor activity	integral to membrane	-2.38
180277_at	T22D1.1	hypothetical protein /// status:Predicted	lipid metabolic process /// signal transduction /// intracellular signaling cascade /// embryonic development ending in birth or egg hatching	phosphoinositide phospholipase C activity /// protein binding	---	-2.22
180292_at	F19C7.8	hypothetical protein	---	---	---	-1.82
180293_at	clec-108	C-type LECtin /// locus:clec-108	---	binding	---	-4.83
180295_s_at	Y63D3A.4	status:Confirmed /// hypothetical protein	---	protein binding	---	1.98
180296_at	Y26D4A.2	status:Partially_confirmed /// hypothetical protein	---	binding	---	-2.69
180303_at	C49C8.2	hypothetical protein /// status:Partially_confirmed	---	---	integral to membrane	2.43
180311_at	M04G7.1	hypothetical protein /// status:Partially_confirmed	---	---	integral to membrane	-2.54
180313_at	srw-120	Serpentine Receptor, class W /// locus:srw-120	---	receptor activity	integral to membrane	1.84
180361_at	F42G2.2	hypothetical protein /// status:Partially_confirmed	---	---	---	1.81
180370_at	far-8	Fatty Acid/Retinol binding protein /// locus:far-8	---	---	---	-2.03
180379_s_at	C17F4.7	hypothetical protein /// status:Confirmed	---	---	---	8.98
180412_at	R05H10.1	hypothetical protein /// status:Confirmed	---	---	---	-2.44
180427_at	ZC395.5	status:Confirmed /// hypothetical protein	---	---	---	-2.15
180448_s_at	T04C12.1	hypothetical protein /// status:Partially_confirmed	---	---	integral to membrane	-2.06
180449_at	srd-23	Serpentine Receptor, class D (delta) /// locus:srd-23	---	---	integral to membrane	-2.58
180450_at	F52E1.14	hypothetical protein /// status:Confirmed	---	---	---	-1.98
180453_at	F53A9.1	hypothetical protein /// status:Partially_confirmed	---	protein binding	---	-2.44
180457_at	dre-1	Daf-12, REdundant with /// locus:dre-1	nematode larval development /// mesodermal cell migration /// gonad development /// embryonic development ending in birth or egg hatching /// oviposition /// molting cycle, collagen and cuticulin-based cuticle /// growth /// locomotion /// regulation of development, heterochronic	ubiquitin-protein ligase activity /// protein binding /// zinc ion binding	---	2.3
180483_at	W02D7.8	hypothetical protein /// status:Partially_confirmed	---	---	integral to membrane	-3.71
180485_s_at	ptr-4	PaTched Related family /// locus:ptr-4	nematode larval development /// embryonic development ending in birth or egg hatching /// body morphogenesis /// molting cycle, collagen and cuticulin-based cuticle /// growth /// locomotion /// positive regulation of multicellular organism growth	hedgehog receptor activity	membrane /// integral to membrane	2.29
180522_at	R11G1.2	hypothetical protein /// hypothetical protein /// status:Predicted /// status:Predicted	---	---	---	-2.08
180522_at	R11G1.7	hypothetical protein /// hypothetical protein /// status:Predicted /// status:Predicted	---	---	---	-2.08
180541_s_at	C24G6.6	hypothetical protein /// status:Partially_confirmed	metabolic process	catalytic activity /// binding /// electron carrier activity /// oxidoreductase activity	---	-1.89
180544_s_at	fbxa-182	F-box A protein /// locus:fbxa-182	---	---	---	-2.16
180562_at	clec-52	C-type LECtin /// locus:clec-52	---	binding /// sugar binding	---	-83.05
180563_at	F47G3.3	hypothetical protein /// status:Partially_confirmed	embryonic development ending in birth or egg hatching	---	---	2.08
180575_at	C13A2.4	hypothetical protein /// status:Confirmed	---	---	integral to membrane	-2.18
180592_s_at	clec-209	C-type LECtin /// hypothetical protein /// status:Predicted /// locus:clec-209	---	binding	---	-3.97
180603_at	F49F1.8	hypothetical protein /// status:Predicted	---	nucleic acid binding /// zinc ion binding	---	-2
180612_s_at	F53A9.8	hypothetical protein /// status:Confirmed	---	---	---	-2.37
180618_at	F14D2.7	hypothetical protein /// status:Predicted	ubiquitin-dependent protein catabolic process	ubiquitin thiolesterase activity	integral to membrane	1.94
180622_at	lact-1	beta-LACTamase domain containing /// locus:lact-1	---	---	---	2.04
180627_at	K04F1.9	hypothetical protein /// status:Partially_confirmed	---	---	---	-1.83
180631_at	F28B4.1	hypothetical protein /// status:Partially_confirmed	---	---	integral to membrane	-1.87
180633_at	C53B7.7	hypothetical protein /// status:Partially_confirmed	proteolysis	metalloendopeptidase activity	membrane	3.54
180642_at	F53A9.2	hypothetical protein /// status:Confirmed	---	protein binding	---	-2.1
180663_s_at	T20D4.3	hypothetical protein /// hypothetical protein /// status:Partially_confirmed /// status:Partially_confirmed	---	---	---	3.2
180663_s_at	T20D4.4	hypothetical protein /// hypothetical protein /// status:Partially_confirmed /// status:Partially_confirmed	---	---	---	3.2
180665_at	D2021.4	hypothetical protein	acyl-CoA metabolic process	acyl-CoA thioesterase activity	---	2.41
180667_at	T09B4.4	hypothetical protein /// status:Confirmed	---	calcium ion binding	---	-1.97
180685_at	C54E4.2	hypothetical protein	---	calcium ion binding	---	1.96
180721_at	ilys-2	Invertebrate LYSozyme /// locus:ilys-2	---	lysozyme activity	---	-2.21
180727_at	F49F1.5	hypothetical protein /// status:Confirmed	---	---	---	-2
180728_at	F17A9.5	hypothetical protein /// status:Partially_confirmed	metabolic process	catalytic activity /// FMN binding /// oxidoreductase activity	---	1.91
180736_s_at	lst-3	Lateral Signaling Target	positive regulation of growth rate /// locomotion /// positive regulation of locomotion	nucleic acid binding /// calcium ion binding /// protein binding	---	1.82
180747_s_at	dsc-4	Defecation Suppressor of Clk-1 /// locus:dsc-4	positive regulation of growth rate /// locomotion	---	---	1.96
180749_at	F22F7.4	hypothetical protein /// status:Partially_confirmed	---	---	integral to membrane	-2.42
180765_at	clec-218	C-type LECtin /// hypothetical protein /// locus:clec-218 /// status:Confirmed	---	binding /// sugar binding	---	-2.89
180766_at	F13B6.3	hypothetical protein /// status:Partially_confirmed	---	---	---	3.22
180797_s_at	F11D11.3	hypothetical protein /// hypothetical protein /// status:Partially_confirmed /// status:Predicted	---	---	---	-2.12
180797_s_at	F11D11.4	hypothetical protein /// hypothetical protein /// status:Partially_confirmed /// status:Predicted	---	---	---	-2.12
180806_at	F56C3.8	hypothetical protein /// status:Partially_confirmed	---	---	integral to membrane	-2.63
180808_at	W06G6.11	hypothetical protein	---	---	---	-3.3
180813_s_at	C01B4.7	hypothetical protein /// status:Predicted /// status:Predicted /// hypothetical protein	transport	transporter activity	integral to membrane	2.19
180815_at	K01H12.1	hypothetical protein /// status:Partially_confirmed	embryonic development ending in birth or egg hatching	zinc ion binding /// metal ion binding	---	-1.93
180838_at	ZK430.1	status:Partially_confirmed /// hypothetical protein	nematode larval development /// rRNA processing /// embryonic development ending in birth or egg hatching /// growth /// positive regulation of growth rate /// locomotion /// ribosome biogenesis	binding	nucleus /// ribonucleoprotein complex	2.21
180839_at	F54B11.7	hypothetical protein /// status:Partially_confirmed	---	protein binding	---	-1.82
180846_at	C27D9.2	hypothetical protein /// status:Confirmed	---	---	---	-1.86
180889_at	T17H7.1	hypothetical protein /// status:Partially_confirmed	embryonic development ending in birth or egg hatching	---	---	-2.32
180906_s_at	dct-16	DAF-16/FOXO Controlled, germline Tumor affecting /// locus:dct-16	---	---	---	2.01
180909_at	C32H11.4	hypothetical protein /// status:Confirmed	---	---	---	2.72
180913_at	aqp-1	AQuaPorin or aquaglyceroporin related	transport /// determination of adult life span	transporter activity	membrane /// integral to membrane	30.99
180914_at	nlp-35	Neuropeptide-Like Protein /// locus:nlp-35	---	---	integral to membrane	-1.94
180917_at	W02D7.4	hypothetical protein /// status:Partially_confirmed	---	---	---	-1.97
180927_at	srx-64	Serpentine Receptor, class X /// locus:srx-64	---	receptor activity	integral to membrane	-1.92
180946_at	ilys-3	Invertebrate LYSozyme /// locus:ilys-3	---	lysozyme activity	---	-3.14
180956_at	Y37H2C.1	status:Partially_confirmed /// hypothetical protein	---	---	integral to membrane	-1.93
180965_at	W04B5.1	hypothetical protein /// status:Confirmed	---	---	---	-2.92
180966_s_at	W04B5.1	hypothetical protein /// status:Confirmed	---	---	---	-4.02
180988_at	Y43F8A.1	status:Predicted /// hypothetical protein	---	---	integral to membrane	-1.98
181010_s_at	ogt-1	O-Linked GlcNAc Transferase	energy reserve metabolic process /// protein amino acid O-linked glycosylation /// positive regulation of growth rate /// dauer larval development	binding /// protein N-acetylglucosaminyltransferase activity /// transferase activity /// transferase activity, transferring glycosyl groups	nucleus /// nucleus /// cytoplasm	1.82
181028_at	ZC266.2	status:Partially_confirmed /// hypothetical protein	---	---	integral to membrane	2.06
181041_at	F09F9.3	hypothetical protein /// status:Partially_confirmed	---	---	integral to membrane	-3.9
181051_at	T19D7.6	hypothetical protein /// status:Partially_confirmed	---	---	---	-2.39
181058_at	Y9C9A.1	status:Partially_confirmed /// hypothetical protein	vitelline membrane formation	structural constituent of vitelline membrane	---	2.69
181068_at	F31B12.2	hypothetical protein	---	---	---	-2.56
181097_at	T21H3.1	hypothetical protein	lipid metabolic process	triacylglycerol lipase activity	---	-2.14
181124_at	srz-31	Serpentine Receptor, class Z /// locus:srz-31	---	---	integral to membrane	-1.97
181129_at	B0507.6	hypothetical protein /// status:Partially_confirmed	---	---	---	-1.92
181136_s_at	noah-2	NOmpA Homolog (Drosophila nompA: no mechanoreceptor potential A) /// locus:noah-2	reproduction /// nematode larval development /// embryonic development ending in birth or egg hatching /// molting cycle, collagen and cuticulin-based cuticle /// growth /// locomotion	---	integral to membrane	1.85
181152_at	spp-2	SaPosin-like Protein family /// SaPosin-like Protein family /// locus:spp-2 /// locus:spp-3	---	---	---	-1.87
181152_at	spp-3	SaPosin-like Protein family /// SaPosin-like Protein family /// locus:spp-2 /// locus:spp-3	---	---	---	-1.87
181158_s_at	T07H6.5	hypothetical protein /// status:Partially_confirmed	---	---	---	-1.98
181196_at	T05A10.6	hypothetical protein /// status:Confirmed	---	---	---	-2.48
181199_at	C18H7.1	hypothetical protein /// status:Confirmed	---	---	integral to membrane	4.41
181202_at	F26G1.2	hypothetical protein	---	---	---	-1.89
181203_at	ZC395.4	status:Partially_confirmed /// hypothetical protein	reproduction	---	---	-3.06
181206_at	---	---	---	---	---	3.11
181272_s_at	C18H2.2	hypothetical protein /// status:Partially_confirmed	---	---	---	2.87
181297_at	F59D6.4	hypothetical protein /// status:Partially_confirmed	---	---	membrane	-1.92
181303_at	C33A12.3	hypothetical protein /// status:Confirmed	---	---	---	1.85
181308_s_at	nas-9	Nematode AStacin protease	proteolysis /// embryonic development ending in birth or egg hatching	metalloendopeptidase activity /// peptidase activity /// metallopeptidase activity /// zinc ion binding /// hydrolase activity /// metal ion binding	extracellular region	-3.44
181315_at	K02E11.3	hypothetical protein /// status:Confirmed	metabolic process	transferase activity, transferring hexosyl groups	---	-2.45
181331_s_at	K09C6.7	hypothetical protein /// hypothetical protein /// status:Confirmed /// status:Partially_confirmed	---	---	---	1.83
181331_s_at	K09C6.8	hypothetical protein /// hypothetical protein /// status:Confirmed /// status:Partially_confirmed	---	---	---	1.83
181343_at	C17F4.3	hypothetical protein /// status:Confirmed	---	---	---	-2.32
181391_at	C08G5.6	hypothetical protein /// status:Partially_confirmed	---	---	integral to membrane	-1.83
181395_at	F29C12.6	hypothetical protein /// status:Predicted	embryonic development ending in birth or egg hatching	---	---	-1.86
181403_at	K04A8.1	hypothetical protein /// status:Confirmed	---	---	integral to membrane	2.51
181432_at	F56C3.1	hypothetical protein /// status:Predicted	---	---	---	-1.98
181447_at	math-38	MATH (meprin-associated Traf homology) domain containing	---	---	---	-2.5
181449_at	clec-21	C-type LECtin /// locus:clec-21	---	binding /// sugar binding	---	-1.82
181452_at	Y57G7A.8	hypothetical protein	---	---	integral to membrane	1.93
181457_at	F37E3.2	hypothetical protein /// status:Partially_confirmed	---	protein binding	integral to membrane	-1.99
181459_at	F49H6.13	hypothetical protein /// status:Partially_confirmed	---	---	integral to membrane	-3.27
181462_at	W03D8.8	hypothetical protein /// status:Partially_confirmed	lipid metabolic process /// acyl-CoA metabolic process	protein binding /// palmitoyl-CoA hydrolase activity /// thiolester hydrolase activity	---	6.06
181488_at	F36A2.14	hypothetical protein /// status:Partially_confirmed	---	---	---	-3.16
181520_at	rhy-1	Regulator of HYpoxia-inducible factor (hif-1) /// locus:rhy-1	---	transferase activity, transferring acyl groups other than amino-acyl groups	integral to membrane	-2.14
181547_s_at	C44E4.7	hypothetical protein /// status:Partially_confirmed	---	ubiquitin-protein ligase activity /// zinc ion binding	---	1.86
181552_at	T22B7.3	hypothetical protein /// status:Partially_confirmed	---	hydrolase activity, acting on carbon-nitrogen (but not peptide) bonds, in linear amidines	cytoplasm	3.16
181587_at	R01H10.4	hypothetical protein /// status:Confirmed	---	---	---	-2.88
181617_at	fbxa-201	F-box A protein /// locus:fbxa-201	---	---	---	-2.65
181654_at	K12H6.4	hypothetical protein /// status:Confirmed	---	---	---	-16.87
181661_at	---	---	---	---	---	-2.1
181681_at	spp-13	SaPosin-like Protein family /// locus:spp-13	---	---	integral to membrane	-1.99
181692_at	F44F4.10	hypothetical protein /// status:Partially_confirmed	---	---	---	-2.45
181697_at	fbxa-163	F-box A protein /// locus:fbxa-163	positive regulation of growth rate	---	---	-3.61
181699_at	fbxb-26	F-box B protein /// locus:fbxb-26	---	---	---	-1.92
181700_at	T25B6.5	hypothetical protein /// status:Predicted	---	---	---	-1.95
181702_at	ZK355.2	hypothetical protein	---	---	integral to membrane	-1.9
181742_s_at	ZC328.3	hypothetical protein	embryonic development ending in birth or egg hatching	---	integral to membrane	1.86
181755_at	srz-19	Serpentine Receptor, class Z /// locus:srz-19	---	receptor activity	integral to membrane	-2.63
181761_at	sfxn-1.4	SideroFleXiN (mitochondrial iron transporter) /// locus:sfxn-1.4	cation transport	cation transmembrane transporter activity	membrane /// integral to membrane	-2.16
181791_at	T06A1.5	hypothetical protein /// status:Partially_confirmed	---	---	integral to membrane	1.82
181794_at	R01H2.1	hypothetical protein /// status:Partially_confirmed	---	---	---	-1.84
181798_at	C25H3.8	hypothetical protein /// status:Partially_confirmed	reproduction /// nematode larval development /// protein localization /// coenzyme A metabolic process /// positive regulation of growth rate /// locomotion	hydroxymethylglutaryl-CoA reductase (NADPH) activity /// coenzyme binding	---	2.36
181821_at	F20A1.6	hypothetical protein	---	---	integral to membrane	-2.85
181822_at	D1022.2	hypothetical protein /// status:Partially_confirmed	---	---	integral to membrane	-3.51
181827_at	F45E1.3	hypothetical protein /// status:Partially_confirmed	metabolic process	catalytic activity	integral to membrane	-1.91
181860_s_at	ZC328.5	status:Partially_confirmed /// hypothetical protein	---	---	---	-2.7
181869_at	C34B2.4	hypothetical protein /// status:Partially_confirmed	meiotic chromosome segregation	zinc ion binding	---	-2.15
181874_at	W03F8.6	hypothetical protein	---	---	integral to membrane	-1.86
181881_at	F58A6.2	hypothetical protein /// status:Predicted	---	---	integral to membrane	1.92
181904_at	C41H7.1	hypothetical protein /// status:Predicted	---	---	---	-1.83
181910_at	ZK1053.3	status:Partially_confirmed /// hypothetical protein	---	protein binding	---	-2.03
181914_s_at	C17D12.3	hypothetical protein /// status:Predicted /// status:Predicted /// hypothetical protein	---	---	integral to membrane	4.49
181915_at	H03A11.2	hypothetical protein /// status:Partially_confirmed	---	---	---	2.24
181929_at	F09C6.10	hypothetical protein /// status:Confirmed	embryonic development ending in birth or egg hatching	---	---	-2.49
181930_at	ZK355.3	status:Partially_confirmed /// hypothetical protein	---	---	---	-5.1
181931_at	npp-6	Nuclear Pore complex Protein	nematode larval development /// embryonic development ending in birth or egg hatching /// growth	---	---	1.87
181945_s_at	btb-18	BTB (Broad/complex/Tramtrack/Bric a brac) domain protein /// locus:btb-18	---	protein binding	integral to membrane	-2.74
181978_at	F10E7.1	hypothetical protein /// status:Partially_confirmed	---	---	---	-2.18
181990_at	F22G12.7	hypothetical protein /// status:Predicted	---	---	---	-2.42
182002_at	Y47H9B.2	status:Partially_confirmed /// hypothetical protein	nematode larval development	---	---	-1.97
182031_at	W02H5.5	hypothetical protein /// status:Partially_confirmed	---	---	integral to membrane	2.41
182067_at	rmd-5	Regulator of Microtubule Dynamics /// locus:rmd-5	---	---	---	-2.26
182081_s_at	E01A2.10	hypothetical protein /// hypothetical protein /// status:Partially_confirmed /// status:Confirmed	---	arylesterase activity	integral to membrane	2.54
182081_s_at	K05F6.11	hypothetical protein /// hypothetical protein /// status:Partially_confirmed /// status:Confirmed	---	arylesterase activity	integral to membrane	2.54
182088_s_at	F57F4.4	hypothetical protein /// status:Partially_confirmed	positive regulation of growth rate	---	---	-10.62
182095_at	K07H8.7	hypothetical protein /// status:Predicted	---	---	integral to membrane	2.61
182104_at	ZK1025.3	status:Confirmed /// hypothetical protein	---	---	integral to membrane	2.12
182106_at	C34H4.1	hypothetical protein /// status:Partially_confirmed	---	---	integral to membrane	3
182143_s_at	grl-4	GRound-Like (grd related) /// locus:grl-4	positive regulation of growth rate	structural constituent of cell wall /// electron carrier activity /// oxidoreductase activity /// nutrient reservoir activity	---	-1.88
182168_at	F21E9.6	hypothetical protein /// status:Predicted	---	---	---	-2.62
182180_at	C50D2.6	hypothetical protein /// status:Partially_confirmed	---	---	---	-2.2
182195_at	fbxa-166	F-box A protein /// locus:fbxa-166	---	protein binding	---	2.17
182196_s_at	ZK1251.9	locus:dcaf-1 /// hypothetical protein	reproduction /// morphogenesis of an epithelium /// embryonic development ending in birth or egg hatching /// positive regulation of growth rate /// hermaphrodite genitalia development	binding	---	2.02
182219_at	K12D12.5	hypothetical protein /// status:Partially_confirmed	---	nucleic acid binding /// ribonuclease H activity	---	-1.99
182267_at	---	---	---	---	---	-2.43
182274_at	K08D9.4	hypothetical protein /// status:Partially_confirmed	---	---	---	3.04
182277_at	math-34	MATH (meprin-associated Traf homology) domain containing	---	---	---	-1.86
182278_s_at	math-34	MATH (meprin-associated Traf homology) domain containing	---	---	---	-1.93
182282_s_at	F59A3.5	hypothetical protein /// hypothetical protein /// status:Confirmed /// status:Confirmed	---	---	---	1.92
182282_s_at	F59A3.6	hypothetical protein /// hypothetical protein /// status:Confirmed /// status:Confirmed	---	---	---	1.92
182288_at	F18E9.7	hypothetical protein /// status:Partially_confirmed	---	---	---	-2.43
182289_s_at	F18E9.7	hypothetical protein /// status:Partially_confirmed	---	---	---	-2.44
182302_at	srd-46	Serpentine Receptor, class D (delta) /// locus:srd-46	---	---	membrane /// integral to membrane	-2.04
182306_at	K05F1.5	hypothetical protein /// status:Partially_confirmed	---	zinc ion binding	intracellular	2.03
182307_at	srv-5	Serpentine Receptor, class V	---	receptor activity	integral to membrane	-2.11
182338_at	T05E7.1	hypothetical protein /// status:Partially_confirmed	lipid metabolic process /// acyl-CoA metabolic process	palmitoyl-CoA hydrolase activity /// thiolester hydrolase activity	---	-1.81
182343_at	F15A8.7	hypothetical protein /// status:Partially_confirmed	---	---	---	-2.18
182347_at	F56H6.13	hypothetical protein /// status:Predicted	---	---	integral to membrane	-1.83
182357_at	nlp-26	Neuropeptide-Like Protein /// locus:nlp-26	---	---	---	3.33
182360_at	lact-6	beta-LACTamase domain containing /// locus:lact-6	---	---	---	-2.32
182384_at	ins-31	INSulin related /// locus:ins-31	---	hormone activity	extracellular region	-4.47
182395_at	grl-23	GRound-Like (grd related) /// locus:grl-23	---	---	integral to membrane	-1.84
182410_at	T10E9.4	hypothetical protein /// status:Partially_confirmed	---	---	integral to membrane	2.23
182419_at	fbxa-203	F-box A protein /// locus:fbxa-203	---	---	---	2.05
182439_at	Y17D7B.4	status:Confirmed /// hypothetical protein	---	---	---	-3.57
182440_s_at	chtl-1	CHoline Transporter-Like	reproduction /// morphogenesis of an epithelium /// nematode larval development /// collagen and cuticulin-based cuticle development /// growth /// hermaphrodite genitalia development	---	integral to membrane	1.89
182444_at	F18G5.6	hypothetical protein /// status:Confirmed	---	---	---	-2.14
182460_at	---	---	---	---	---	-1.82
182464_s_at	dnj-7	DNaJ domain (prokaryotic heat shock protein) /// locus:dnj-7	response to stress	binding /// heat shock protein binding	---	1.89
182468_s_at	K05F1.6	hypothetical protein	transport	transporter activity	membrane /// integral to membrane	2.6
182472_at	F25F6.1	hypothetical protein /// status:Predicted	---	---	---	-1.88
182479_at	B0454.5	hypothetical protein /// status:Confirmed	---	---	integral to membrane	-1.84
182483_s_at	T20F7.1	hypothetical protein /// status:Partially_confirmed	---	zinc ion binding	intracellular	-1.85
182484_at	nlp-5	Neuropeptide-Like Protein /// locus:nlp-5	---	---	---	-1.85
182487_s_at	pho-1	intestinal acid PHOsphatase /// locus:pho-1	nematode larval development /// embryonic development ending in birth or egg hatching /// growth	acid phosphatase activity	integral to membrane	2.45
182490_at	ZK470.6	status:Partially_confirmed /// hypothetical protein	---	---	---	-2.36
182491_at	F53F4.13	hypothetical protein /// status:Confirmed	---	---	integral to membrane	-1.93
182492_at	math-14	MATH (meprin-associated Traf homology) domain containing /// locus:math-14	---	protein binding	---	1.99
182505_at	K07D4.2	hypothetical protein /// status:Partially_confirmed	---	---	---	-1.86
182525_at	pqn-84	Prion-like-(Q/N-rich)-domain-bearing protein /// locus:pqn-84	morphogenesis of an epithelium	sugar binding	---	-1.84
182545_at	clec-223	C-type LECtin /// locus:clec-223	---	binding	---	3.2
182551_s_at	phat-6	PHAryngeal gland Toxin-related /// locus:phat-6	---	---	---	-2.08
182553_at	C54D10.3	hypothetical protein /// status:Confirmed	---	---	---	-1.84
182579_at	fbxa-164	F-box A protein /// locus:fbxa-164	translation	structural constituent of ribosome	intracellular /// ribosome	-2.15
182582_at	srh-173	Serpentine Receptor, class H /// locus:srh-173	---	---	integral to membrane	-2.41
182599_s_at	W02G9.4	hypothetical protein /// status:Confirmed	---	---	---	3.4
182609_at	B0496.6	hypothetical protein /// status:Partially_confirmed	---	---	integral to membrane	-2.06
182611_at	srw-109	Serpentine Receptor, class W /// locus:srw-109	---	receptor activity	integral to membrane	-1.92
182628_s_at	T21F4.1	hypothetical protein /// status:Confirmed	arginine metabolic process	arginase activity /// hydrolase activity /// hydrolase activity, acting on carbon-nitrogen (but not peptide) bonds, in linear amidines /// metal ion binding	---	-2.7
182631_at	F39G3.2	hypothetical protein /// status:Partially_confirmed	---	---	integral to membrane	1.81
182649_at	srv-11	Serpentine Receptor, class V /// locus:srv-11	---	---	integral to membrane	-2.16
182653_at	R07E4.3	hypothetical protein /// status:Confirmed	---	ubiquinol-cytochrome-c reductase activity	---	-1.92
182674_at	srab-10	Serpentine Receptor, class AB (class A-like) /// locus:srab-10	---	receptor activity	integral to membrane	2.65
182675_at	Y4C6B.3	status:Partially_confirmed /// hypothetical protein	transport	transporter activity	integral to membrane	2.15
182688_at	Y39A1A.2	status:Partially_confirmed /// hypothetical protein	---	---	---	-1.87
182708_s_at	Y43F8C.8	status:Confirmed /// hypothetical protein	positive regulation of growth rate	---	---	1.91
182713_s_at	phat-3	PHAryngeal gland Toxin-related /// locus:phat-3	---	---	---	-2.31
182772_at	F48G7.2	hypothetical protein /// status:Partially_confirmed	---	---	---	-4.36
182793_at	C11G10.1	hypothetical protein /// status:Confirmed	---	---	integral to membrane	-2.02
182806_at	sru-37	Serpentine Receptor, class U /// locus:sru-37	---	---	integral to membrane	-1.99
182814_at	prg-2	Piwi (fruitfly) Related Gene /// locus:prg-2	embryonic development ending in birth or egg hatching	nucleic acid binding	---	2.97
182822_s_at	ntl-2	NOT-Like (yeast CCR4/NOT complex component)	reproduction /// morphogenesis of an epithelium /// nematode larval development /// determination of adult life span /// embryonic development ending in birth or egg hatching /// growth /// positive regulation of growth rate /// locomotion /// positive regulation of multicellular organism growth /// hermaphrodite genitalia development /// regulation of transcription	protein binding /// transcription regulator activity /// identical protein binding	nucleus	2.05
182827_at	W03B1.6	hypothetical protein	---	---	---	1.82
182828_at	F10G2.4	hypothetical protein /// status:Partially_confirmed	---	---	---	-2.38
182838_s_at	T05E12.3	hypothetical protein /// status:Confirmed	potassium ion transport	voltage-gated potassium channel activity /// protein binding	voltage-gated potassium channel complex /// membrane	-2.74
182844_s_at	anc-1	abnormal nuclear ANChorage /// locus:anc-1	nematode larval development /// cytoskeleton organization /// embryonic development ending in birth or egg hatching /// molting cycle, collagen and cuticulin-based cuticle /// growth /// positive regulation of growth rate /// localization	actin binding	nucleus /// nuclear outer membrane /// cytoplasm /// cytoskeleton /// membrane /// integral to membrane	1.83
182849_at	Y37A1B.5	status:Confirmed /// hypothetical protein	---	selenium binding	---	2.83
182901_at	F20A1.8	hypothetical protein /// status:Partially_confirmed	---	---	---	-4.1
182903_at	ZK418.6	status:Partially_confirmed /// hypothetical protein	G-protein coupled receptor protein signaling pathway /// positive regulation of growth rate	---	integral to membrane	-1.82
182920_at	Y37H2B.1	status:Partially_confirmed /// hypothetical protein	---	---	---	-1.99
182930_at	pqn-75	Prion-like-(Q/N-rich)-domain-bearing protein	---	---	integral to membrane	-1.88
182946_at	fbxa-145	F-box A protein /// locus:fbxa-145	embryonic development ending in birth or egg hatching	---	integral to membrane	-1.95
182960_at	hlh-13	Helix Loop Helix /// locus:hlh-13	nematode larval development /// embryonic development ending in birth or egg hatching /// growth /// locomotion /// regulation of transcription	transcription regulator activity	nucleus	-3.75
182963_at	F23D12.1	hypothetical protein /// status:Confirmed	---	---	integral to membrane	-4.02
182974_at	T01C8.3	hypothetical protein /// status:Partially_confirmed	---	---	---	-2.16
182999_at	W06H8.2	hypothetical protein /// status:Partially_confirmed	metabolic process	catalytic activity /// FMN binding /// oxidoreductase activity	---	2.42
183002_at	grl-19	GRound-Like (grd related) /// locus:grl-19	---	---	---	-2.32
183004_at	ZK185.1	status:Partially_confirmed /// hypothetical protein	---	zinc ion binding	intracellular	-1.81
183018_at	F16B4.7	hypothetical protein /// status:Partially_confirmed	---	---	---	-2.01
183030_at	C16C8.7	hypothetical protein /// status:Predicted	---	---	---	-2.52
183034_at	C16C8.8	hypothetical protein /// status:Predicted	---	---	---	-2.05
183055_at	Y73F4A.3	status:Confirmed /// hypothetical protein	histidine catabolic process /// carbohydrate catabolic process	catalytic activity /// dopamine beta-monooxygenase activity /// carbohydrate binding	---	-6.06
183068_at	fbxb-83	F-box B protein /// locus:fbxb-83	---	---	---	-2.59
183073_at	ZK355.5	status:Predicted /// hypothetical protein	---	---	membrane	-1.93
183076_at	T15B7.1	hypothetical protein /// status:Confirmed	signal transduction /// embryonic development ending in birth or egg hatching	receptor binding /// binding	---	-1.97
183084_at	C54D10.8	hypothetical protein /// status:Confirmed	---	---	---	-4.22
183099_s_at	E02H9.6	hypothetical protein /// hypothetical protein /// status:Predicted /// status:Predicted	---	---	integral to membrane	2.23
183099_s_at	W04B5.6	hypothetical protein /// hypothetical protein /// status:Predicted /// status:Predicted	---	---	integral to membrane	2.23
183102_at	C08A9.3	hypothetical protein /// status:Partially_confirmed	---	---	integral to membrane	-1.99
183106_at	F32B5.3	hypothetical protein /// status:Predicted	---	---	integral to membrane	-2.3
183115_at	C34H4.2	hypothetical protein /// status:Confirmed	---	---	---	3.36
183132_at	T07D1.3	hypothetical protein /// status:Predicted	metabolic process	oxidoreductase activity	integral to membrane	2.04
183142_at	B0348.2	hypothetical protein /// status:Partially_confirmed	---	---	integral to membrane	1.86
183154_at	Y12A6A.1	status:Confirmed /// hypothetical protein	---	---	---	-1.87
183155_at	D2096.1	hypothetical protein /// status:Predicted	protein transport	protein transporter activity	mitochondrial inner membrane	-2.8
183160_at	C08A9.3	hypothetical protein /// status:Partially_confirmed	---	---	integral to membrane	-2.25
183169_s_at	F07B7.8	hypothetical protein /// hypothetical protein /// status:Predicted /// status:Predicted	---	---	---	-2.46
183169_s_at	K06C4.1	hypothetical protein /// hypothetical protein /// status:Predicted /// status:Predicted	---	---	---	-2.46
183206_at	F07C3.9	hypothetical protein /// status:Predicted	---	---	integral to membrane	-4.41
183211_s_at	C04F12.7	hypothetical protein /// status:Confirmed	---	---	integral to membrane	2.44
183215_at	grl-22	GRound-Like (grd related) /// locus:grl-22	positive regulation of growth rate	---	integral to membrane	-1.87
183255_at	T22E5.6	hypothetical protein /// status:Partially_confirmed	response to oxidative stress	peroxidase activity /// heme binding	integral to membrane	-2.11
183268_at	Y41C4A.6	status:Partially_confirmed /// hypothetical protein	---	---	---	-1.86
183274_at	F28C6.10	hypothetical protein /// status:Confirmed	---	---	---	-3.45
183278_at	C45E5.3	hypothetical protein /// status:Partially_confirmed	carbohydrate metabolic process /// chitin catabolic process	catalytic activity /// hydrolase activity, hydrolyzing O-glycosyl compounds /// chitinase activity /// cation binding	---	-2.2
183295_at	C09B8.5	hypothetical protein /// status:Partially_confirmed	embryonic development ending in birth or egg hatching	---	---	1.92
183297_at	T26A8.1	hypothetical protein /// status:Confirmed	---	---	integral to membrane	1.85
183309_at	K03H6.2	hypothetical protein /// status:Partially_confirmed	lipid metabolic process	triacylglycerol lipase activity	---	-3.04
183313_at	K02B2.6	hypothetical protein /// status:Predicted	embryonic development ending in birth or egg hatching	---	---	-1.89
183327_at	C32H11.3	hypothetical protein /// status:Partially_confirmed	---	---	---	1.93
183335_at	Y39B6A.29	status:Partially_confirmed /// hypothetical protein	---	---	integral to membrane	-2.17
183337_at	C49H3.4	hypothetical protein /// status:Partially_confirmed	---	---	---	1.82
183342_at	C08A9.8	hypothetical protein /// status:Predicted	---	---	---	-1.98
183394_at	T26A8.3	hypothetical protein /// status:Partially_confirmed	---	---	---	-2.63
183416_s_at	tgt-2	TRNA Guanine Transglycosylase /// locus:tgt-2	tRNA modification /// queuosine biosynthetic process	queuine tRNA-ribosyltransferase activity	---	2.47
183426_at	Y56A3A.2	status:Partially_confirmed /// hypothetical protein	proteolysis /// positive regulation of growth rate /// locomotion	metalloendopeptidase activity	membrane /// integral to membrane	2.23
183442_at	K10D11.2	hypothetical protein /// status:Partially_confirmed	---	---	---	6.66
183450_at	clec-1	C-type LECtin /// locus:clec-1	morphogenesis of an epithelium /// nematode larval development /// body morphogenesis /// growth /// locomotion /// positive regulation of multicellular organism growth /// hermaphrodite genitalia development	binding	---	-2.31
183461_at	Y48C3A.9	status:Partially_confirmed /// hypothetical protein	---	DNA binding /// single-stranded DNA binding /// transcription regulator activity	nucleus	-1.83
183473_at	D2096.9	hypothetical protein /// status:Partially_confirmed	embryonic development ending in birth or egg hatching	---	integral to membrane	-1.98
183490_at	bed-1	BED-type zinc finger transcription factor	reproduction	DNA binding /// protein binding	---	3.65
183526_at	C14C6.5	hypothetical protein /// status:Confirmed	---	---	---	-3.38
183527_s_at	C14C6.5	hypothetical protein /// status:Confirmed	---	---	---	-4.85
183559_s_at	C27A7.6	hypothetical protein /// status:Partially_confirmed /// hypothetical protein /// hypothetical protein	transport	transporter activity	integral to membrane	1.93
183566_at	C14C6.2	hypothetical protein /// status:Confirmed	---	---	---	-1.87
183567_s_at	C14C6.2	hypothetical protein /// status:Confirmed	---	---	---	-2.49
183611_at	C06A5.4	hypothetical protein /// status:Partially_confirmed	---	---	---	1.9
183621_at	F31F7.1	hypothetical protein	metabolic process /// embryonic development ending in birth or egg hatching	N-acetyltransferase activity	---	-2.17
183639_at	F13A7.11	hypothetical protein /// status:Confirmed	---	---	---	-1.88
183649_at	wrk-1	Wrapper/Rega-1/Klingon homolog	---	---	---	1.91
183664_at	F17E9.3	hypothetical protein /// status:Partially_confirmed	---	---	---	-2.13
183676_s_at	numr-1	NUclear localized Metal Responsive /// NUclear localized Metal Responsive /// locus:numr-2 /// locus:numr-1	---	protein binding	---	-1.99
183676_s_at	numr-2	NUclear localized Metal Responsive /// NUclear localized Metal Responsive /// locus:numr-2 /// locus:numr-1	---	protein binding	---	-1.99
183683_at	oig-3	One IG domain /// locus:oig-3	reproduction /// nematode larval development /// embryonic development ending in birth or egg hatching /// growth /// positive regulation of multicellular organism growth	---	---	-1.81
183684_at	K03E5.1	hypothetical protein /// status:Predicted	---	---	integral to membrane	-2.39
183699_at	---	---	---	---	---	-2.06
183713_at	C24G7.2	hypothetical protein /// status:Partially_confirmed	transport /// ion transport /// sodium ion transport	ion channel activity /// sodium channel activity /// sodium ion binding	membrane /// integral to membrane	2.25
183721_at	F17E9.4	hypothetical protein /// status:Confirmed	---	---	integral to membrane	-1.87
183765_s_at	F34D10.4	hypothetical protein /// status:Partially_confirmed	positive regulation of growth rate	---	---	-2.04
183770_at	W02H5.2	hypothetical protein /// status:Predicted	---	---	---	-1.89
183774_s_at	K12H6.9	hypothetical protein /// status:Partially_confirmed	---	---	---	-18.23
183775_at	noah-1	NOmpA Homolog (Drosophila nompA: no mechanoreceptor potential A)	nematode larval development /// embryonic development ending in birth or egg hatching /// body morphogenesis /// molting cycle, collagen and cuticulin-based cuticle /// growth /// locomotion /// negative regulation of vulval development	receptor activity	integral to membrane	2.26
183816_at	K09E2.2	hypothetical protein /// status:Partially_confirmed	---	---	---	1.81
183828_at	C08F11.3	hypothetical protein /// status:Partially_confirmed	---	---	integral to membrane	-3.35
183870_at	C01G10.18	hypothetical protein /// hypothetical protein /// status:Partially_confirmed /// status:Predicted	---	---	integral to membrane	-1.89
183870_at	C01G10.5	hypothetical protein /// hypothetical protein /// status:Partially_confirmed /// status:Predicted	---	---	integral to membrane	-1.89
183878_at	F09F7.3	hypothetical protein /// status:Confirmed	reproduction /// nematode larval development /// transcription /// embryonic development ending in birth or egg hatching /// growth /// positive regulation of growth rate	DNA binding /// DNA-directed RNA polymerase activity /// ribonucleoside binding	---	2.17
183886_at	numr-2	NUclear localized Metal Responsive /// locus:numr-2	---	---	---	-2.01
183893_s_at	C08F1.6	hypothetical protein /// status:Confirmed	---	---	integral to membrane	-2.05
183895_at	nlp-25	Neuropeptide-Like Protein /// locus:nlp-25	---	protein binding	---	2.55
183900_at	T12B3.2	hypothetical protein /// status:Partially_confirmed	transport	transporter activity	integral to membrane	2.03
183902_at	F43E2.5	msra-1	protein metabolic process	oxidoreductase activity, acting on sulfur group of donors, disulfide as acceptor	---	1.81
183931_at	C47D12.4	hypothetical protein /// status:Partially_confirmed	---	---	---	2.07
183973_at	F17E9.2	hypothetical protein /// status:Partially_confirmed	---	---	---	-3.66
183976_at	ntl-3	NOT-Like (yeast CCR4/NOT complex component)	nematode larval development /// embryonic development ending in birth or egg hatching /// growth /// hermaphrodite genitalia development /// regulation of transcription	transcription regulator activity	nucleus	-2.69
184017_at	F13H8.3	hypothetical protein /// status:Partially_confirmed	---	---	---	-2.15
184018_at	T14B4.8	hypothetical protein /// status:Partially_confirmed	embryonic development ending in birth or egg hatching	---	---	1.86
184059_at	clec-206	C-type LECtin /// locus:clec-206	---	binding	---	-2.07
184063_at	ZK1067.8	status:Predicted /// hypothetical protein	---	---	---	-1.89
184078_at	C42C1.7	oac-59	---	transferase activity, transferring acyl groups other than amino-acyl groups	---	2.33
184093_at	M01H9.1	hypothetical protein /// status:Partially_confirmed	cell redox homeostasis	---	---	2.28
184098_s_at	Y73F4A.2	status:Confirmed /// hypothetical protein	histidine catabolic process /// embryonic development ending in birth or egg hatching /// carbohydrate catabolic process	catalytic activity /// dopamine beta-monooxygenase activity /// carbohydrate binding	extracellular region	-2.04
184100_at	math-25	MATH (meprin-associated Traf homology) domain containing /// locus:math-25	locomotion /// positive regulation of locomotion	---	---	-1.99
184102_s_at	WBGene00014182	status:Predicted /// status:Predicted /// hypothetical protein /// hypothetical protein	---	---	---	2.89
184103_s_at	F07B7.2	hypothetical protein /// hypothetical protein /// status:Predicted /// status:Predicted	---	protein binding	---	-2.95
184103_s_at	W09B7.2	hypothetical protein /// hypothetical protein /// status:Predicted /// status:Predicted	---	protein binding	---	-2.95
184114_at	F25E5.7	hypothetical protein /// status:Partially_confirmed	proteolysis	catalytic activity /// serine-type endopeptidase activity	---	-5.11
184116_s_at	T05E12.6	hypothetical protein	---	---	---	2.1
184129_at	C08F11.1	hypothetical protein /// status:Partially_confirmed	---	---	integral to membrane	-3.73
184132_at	F36H5.8	hypothetical protein /// status:Partially_confirmed	proteolysis	serine-type peptidase activity	membrane	-2.56
184144_at	R193.2	hypothetical protein /// status:Partially_confirmed	positive regulation of growth rate	---	---	12.64
184151_at	F26A1.9	hypothetical protein /// status:Partially_confirmed	positive regulation of growth rate	---	---	-2.2
184164_at	mif-1	MIF (macrophage migration inhibitory factor) related /// locus:mif-1	---	---	---	-1.87
184166_at	F43C9.1	hypothetical protein /// status:Confirmed	---	---	---	-1.81
184170_at	F47B8.10	hypothetical protein /// status:Confirmed	transport /// response to oxidative stress /// positive regulation of growth rate	peroxidase activity /// transporter activity /// heme binding	integral to membrane	-2.29
184174_at	ZC204.12	status:Confirmed /// hypothetical protein	---	protein binding	---	-3.75
184175_at	F58E10.7	hypothetical protein /// status:Confirmed	---	---	---	-4.29
184185_at	C49C3.11	hypothetical protein /// status:Partially_confirmed	reproduction /// transport	hormone activity /// binding	extracellular region /// extracellular space /// integral to membrane	-2.66
184191_at	cnc-4	CaeNaCin (Caenorhabditis bacteriocin) /// locus:cnc-4	---	---	integral to membrane	-1.86
184194_s_at	ZK1025.7	status:Partially_confirmed /// hypothetical protein	---	---	integral to membrane	2.33
184203_at	smc-3	SMC (structural maintenance of chromosomes) family /// locus:smc-3	reproduction /// morphogenesis of an epithelium /// chromosome segregation /// cytokinesis, completion of separation /// determination of adult life span /// embryonic development ending in birth or egg hatching /// chromosome condensation /// collagen and cuticulin-based cuticle development /// positive regulation of growth rate /// locomotion /// hermaphrodite genitalia development /// chromoso…	protein serine/threonine kinase activity /// protein binding /// ATP binding /// ATPase activity	chromosome	-1.87
184208_at	Y17G7B.14	status:Partially_confirmed /// hypothetical protein	signal transduction /// sensory perception /// embryonic development ending in birth or egg hatching	protein binding	---	-2.82
184215_at	Y73F8A.11	status:Partially_confirmed /// hypothetical protein	---	---	integral to membrane	-2.74
184219_at	C07F11.2	hypothetical protein /// status:Partially_confirmed	positive regulation of growth rate	---	---	-2.69
184222_s_at	dct-9	DAF-16/FOXO Controlled, germline Tumor affecting /// locus:dct-9	embryonic development ending in birth or egg hatching	structural molecule activity	---	-1.81
184224_at	Y45F10D.6	status:Predicted /// hypothetical protein	---	---	---	2.11
184253_at	fipr-28	FIP (Fungus-Induced Protein) Related /// locus:fipr-28	---	---	---	-1.89
184262_at	---	---	---	---	---	2
184266_at	sta-1	STAT transcription factor family	transcription /// regulation of transcription, DNA-dependent /// signal transduction /// multicellular organismal development /// dauer larval development /// dauer larval development /// regulation of transcription	DNA binding /// transcription factor activity /// signal transducer activity /// calcium ion binding /// protein binding /// protein binding /// identical protein binding	nucleus /// cytoplasm	2.46
184295_at	Y37H2A.14	status:Partially_confirmed /// hypothetical protein	---	---	integral to membrane	2.25
184320_at	C14F11.4	hypothetical protein	---	---	---	2.91
184324_s_at	C13F10.4	hypothetical protein /// status:Partially_confirmed	nematode larval development /// growth /// positive regulation of growth rate /// locomotion	binding	---	1.81
184344_s_at	Y57G7A.6	status:Partially_confirmed /// hypothetical protein	---	---	integral to membrane	1.97
184346_at	dyci-1	DYnein Chain, light Intermediate /// locus:dyci-1	nematode larval development /// embryonic development ending in birth or egg hatching /// pronuclear migration /// growth	protein binding	---	1.88
184367_s_at	---	---	---	---	---	-2.35
184373_at	Y75B7B.1	status:Partially_confirmed /// hypothetical protein	---	---	---	-2.07
184382_at	---	---	---	---	---	-1.98
184384_s_at	Y17G9A.2	status:Confirmed /// hypothetical protein	---	---	integral to membrane	-1.9
184394_s_at	Y73F8A.24	status:Partially_confirmed /// hypothetical protein	reproduction /// DNA repair /// regulation of transcription, DNA-dependent /// embryonic development ending in birth or egg hatching /// hermaphrodite genitalia development	RNA polymerase II transcription factor activity	nucleus	1.82
184419_at	sdz-33	SKN-1 Dependent Zygotic transcript /// locus:sdz-33	---	---	---	-1.94
184427_s_at	T23E7.2	hypothetical protein	---	---	integral to membrane	1.84
184438_at	T20D4.11	hypothetical protein /// status:Partially_confirmed	---	---	---	2.53
184448_at	F41G3.10	hypothetical protein /// hypothetical protein /// status:Confirmed /// status:Predicted	---	protein binding	---	-2.44
184448_at	F41G3.20	hypothetical protein /// hypothetical protein /// status:Confirmed /// status:Predicted	---	protein binding	---	-2.44
184451_at	Y57G7A.1	status:Confirmed /// hypothetical protein	---	---	---	-1.89
184473_at	Y53C10A.2	status:Partially_confirmed /// hypothetical protein	---	---	---	2.19
184489_s_at	C50E3.13	hypothetical protein /// status:Confirmed	---	protein binding	---	2
184508_s_at	W09G12.7	hypothetical protein /// status:Partially_confirmed	---	protein binding	---	-2.1
184516_at	C46E10.3	hypothetical protein /// status:Predicted	---	---	---	-2.16
184518_s_at	C17B7.3	hypothetical protein /// hypothetical protein /// status:Predicted /// status:Confirmed	---	---	integral to membrane	1.97
184518_s_at	T28A11.3	hypothetical protein /// hypothetical protein /// status:Predicted /// status:Confirmed	---	---	integral to membrane	1.97
184531_s_at	W10G11.1	hypothetical protein /// status:Partially_confirmed	---	---	---	-2.03
184533_at	C17H12.8	hypothetical protein /// status:Confirmed	---	---	---	2.18
184534_s_at	C17H12.8	hypothetical protein /// status:Confirmed	---	---	---	1.9
184538_s_at	sta-1	STAT transcription factor family	transcription /// regulation of transcription, DNA-dependent /// signal transduction /// multicellular organismal development /// dauer larval development /// dauer larval development /// regulation of transcription	DNA binding /// transcription factor activity /// signal transducer activity /// calcium ion binding /// protein binding /// protein binding /// identical protein binding	nucleus /// cytoplasm	1.91
184549_at	K05F6.10	hypothetical protein /// status:Predicted	---	---	---	-4.21
184555_at	T20D4.12	hypothetical protein /// status:Predicted	---	---	---	9.17
184558_at	nlp-17	Neuropeptide-Like Protein /// locus:nlp-17	body morphogenesis	---	---	1.94
184562_at	C18A11.2	hypothetical protein /// status:Partially_confirmed	---	---	---	-2.08
184569_at	W08A12.4	hypothetical protein /// status:Partially_confirmed	positive regulation of growth rate	---	---	-2.68
184579_at	C04E12.4	hypothetical protein /// status:Partially_confirmed	---	---	integral to membrane	3.03
184585_at	Y46G5A.23	status:Partially_confirmed /// hypothetical protein	---	---	---	-3.45
184596_s_at	mec-17	MEChanosensory abnormality /// locus:mec-17	neuron development	---	---	1.92
184612_s_at	wapl-1	WAPL (Drosophila Wings APart-Like cohesin interactor)	embryonic development ending in birth or egg hatching /// oviposition /// positive regulation of growth rate /// locomotion	binding	---	1.95
184616_at	Y18D10A.4	status:Predicted /// hypothetical protein	---	---	integral to membrane	-1.88
184619_at	clec-137	C-type LECtin /// locus:clec-137	---	binding	---	-14.15
184656_at	T19D12.3	hypothetical protein /// status:Predicted	---	---	---	3.47
184698_at	Y49E10.16	status:Confirmed /// hypothetical protein	lipid metabolic process	triacylglycerol lipase activity	---	-1.83
184707_s_at	dod-21	Downstream Of DAF-16 (regulated by DAF-16) /// locus:dod-21	determination of adult life span	---	---	2.2
184717_at	djr-1.2	DJ-1 (mammalian transcriptional regulator) Related /// locus:djr-1.2	---	---	---	2.66
184752_at	---	---	---	---	---	-2.11
184755_at	csr-1	Chromosome-Segregation and RNAi deficient	reproduction /// nematode larval development /// embryonic development ending in birth or egg hatching /// growth	nucleic acid binding	---	1.98
184756_at	---	---	---	---	---	-1.93
184771_at	H02F09.2	hypothetical protein /// status:Partially_confirmed	---	---	---	4.48
184777_s_at	K06A9.1	hypothetical protein	---	---	integral to membrane	3.04
184822_at	Y40C7B.4	status:Partially_confirmed /// hypothetical protein	---	---	---	-2.33
184829_at	F07G11.1	hypothetical protein /// status:Partially_confirmed	---	---	integral to membrane	-2.64
184838_at	sre-27	Serpentine Receptor, class E (epsilon) /// locus:sre-27	sensory perception of chemical stimulus	transmembrane receptor activity	membrane /// integral to membrane	-2.01
184868_at	F12A10.1	hypothetical protein /// status:Confirmed	---	---	integral to membrane	-2.86
184874_at	W04H10.2	hypothetical protein /// status:Predicted	---	---	---	-2.5
184876_at	math-41	MATH (meprin-associated Traf homology) domain containing /// locus:math-41	---	protein binding	---	3.61
184880_at	F48A11.2	hypothetical protein /// status:Predicted	---	---	---	-2.06
184890_at	Y42G9A.2	status:Confirmed /// hypothetical protein	---	---	---	-2.15
184913_s_at	T22F3.11	hypothetical protein	transport	transporter activity	integral to membrane	35.91
184916_at	Y49F6B.2	status:Confirmed /// hypothetical protein	reproduction /// morphogenesis of an epithelium /// nematode larval development /// embryonic development ending in birth or egg hatching /// growth /// positive regulation of growth rate	---	---	1.97
184946_at	Y40H7A.11	status:Partially_confirmed /// hypothetical protein	---	---	integral to membrane	-1.97
184948_at	Y57G11B.2	status:Predicted /// hypothetical protein	---	---	---	-2.12
184957_at	str-159	Seven TM Receptor /// locus:str-159	---	---	integral to membrane	-2.16
184993_at	H02F09.3	hypothetical protein /// status:Predicted	---	---	integral to membrane	2.73
185017_at	C49H3.12	hypothetical protein /// status:Partially_confirmed	---	---	---	-2.25
185046_at	F19F10.3	hypothetical protein /// status:Predicted	---	---	---	-2.67
185099_at	srbc-19	Serpentine Receptor, class BC (class B-like) /// locus:srbc-19	---	receptor activity	integral to membrane	-1.81
185101_at	T28A11.6	hypothetical protein /// status:Partially_confirmed	---	---	integral to membrane	1.88
185124_at	T10B11.5	hypothetical protein /// status:Partially_confirmed	---	---	---	-2.34
185138_s_at	ZC239.17	status:Confirmed /// hypothetical protein	potassium ion transport	voltage-gated potassium channel activity /// protein binding	voltage-gated potassium channel complex /// membrane /// integral to membrane	-2.12
185145_at	Y46D2A.2	status:Partially_confirmed /// hypothetical protein	---	---	---	-2.84
185160_at	F18A12.2	hypothetical protein /// status:Predicted	---	---	integral to membrane	2.02
185170_at	sre-18	Serpentine Receptor, class E (epsilon) /// locus:sre-18	sensory perception of chemical stimulus	transmembrane receptor activity	integral to membrane	-2.06
185173_at	F41E6.12	hypothetical protein /// status:Confirmed	---	---	---	-2.37
185216_at	ZK1290.1	status:Partially_confirmed /// hypothetical protein	---	---	---	-1.88
185218_at	clec-136	C-type LECtin /// locus:clec-136	---	---	---	-1.89
185222_at	Y57A10A.4	status:Predicted /// hypothetical protein	---	---	---	1.87
185223_at	K02F3.12	hypothetical protein	DNA recombination	nucleic acid binding /// helicase activity /// ATP binding /// ATP-dependent helicase activity	---	1.99
185229_at	Y39B6A.5	status:Confirmed /// hypothetical protein	---	---	integral to membrane	-1.86
185231_at	oac-29	O-ACyltransferase homolog /// locus:oac-29	---	transferase activity, transferring acyl groups other than amino-acyl groups	integral to membrane	2.27
185233_at	scrm-8	SCRaMblase (phospholipid scramblase) /// locus:scrm-8	---	protein binding	---	-1.88
185270_at	F53E10.4	hypothetical protein /// status:Confirmed	---	---	---	-2.41
185273_at	E02C12.8	hypothetical protein	---	---	---	3.73
185275_at	cdr-5	CaDmium Responsive /// locus:cdr-5	---	---	integral to membrane	14.04
185280_at	H43E16.1	hypothetical protein /// status:Partially_confirmed	---	---	integral to membrane	4.76
185290_at	Y47H10A.3	status:Partially_confirmed /// hypothetical protein	---	---	---	-2.32
185299_s_at	---	---	---	---	---	1.84
185309_at	clec-92	C-type LECtin /// locus:clec-92	---	binding	integral to membrane	-1.88
185311_at	srx-62	Serpentine Receptor, class X /// locus:srx-62	---	receptor activity	integral to membrane	-1.81
185324_at	F46F5.16	hypothetical protein /// status:Partially_confirmed	---	---	integral to membrane	-3.64
185338_at	fbxb-11	F-box B protein /// locus:fbxb-11	---	---	integral to membrane	-3.13
185339_at	F15E11.5	hypothetical protein /// status:Partially_confirmed	---	---	membrane	-2.01
185341_s_at	bcc-1	BiCaudal C (Drosophila) homolog /// locus:bcc-1	embryonic development ending in birth or egg hatching	RNA binding /// phosphopantetheine binding	---	-2.15
185361_at	C17G10.7	hypothetical protein /// status:Partially_confirmed	---	---	integral to membrane	-2.76
185369_at	ugt-27	UDP-GlucuronosylTransferase /// locus:ugt-27	metabolic process	transferase activity /// transferase activity, transferring glycosyl groups /// transferase activity, transferring hexosyl groups	integral to membrane	-2.28
185375_at	D1007.10	hypothetical protein	---	---	integral to membrane	2.04
185377_at	lst-4	Lateral Signaling Target	cell communication /// embryonic development ending in birth or egg hatching	protein binding /// phosphoinositide binding	---	-1.88
185383_at	C41D11.3	hypothetical protein	---	---	---	2.86
185389_at	D2096.10	hypothetical protein /// status:Partially_confirmed	---	---	---	2.37
185393_s_at	nlp-21	Neuropeptide-Like Protein	---	---	---	2.22
185413_at	Y75B12B.3	status:Partially_confirmed /// hypothetical protein	---	---	---	-2
185453_at	H14A12.5	hypothetical protein /// status:Partially_confirmed	---	---	---	-1.99
185454_s_at	nspb-1 nspb-2 nspb-3 nspb-4 nspb-5	Nematode Specific Peptide family, group B /// Nematode Specific Peptide family, group B /// Nematode Specific Peptide family, group B /// Nematode Specific Peptide family, group B /// Nematode Specific Peptide family, group B /// locus:nspb-3 /// locus:nspb-5 /// locus:nspb-4 /// locus:nspb-2 /// locus:nspb-1	reproduction /// nematode larval development /// embryonic development ending in birth or egg hatching /// growth	---	integral to membrane	1.85
185458_s_at	F19B10.2	hypothetical protein /// status:Confirmed	---	---	---	2.16
185494_at	F42A10.6	hypothetical protein /// status:Confirmed	---	---	---	-3.17
185497_at	F43B10.1	hypothetical protein /// status:Partially_confirmed	---	---	integral to membrane	-2.02
185498_at	Y106G6D.6	status:Confirmed /// hypothetical protein	---	---	integral to membrane	-2.24
185507_at	crn-4	Cell-death-Related Nuclease /// locus:crn-4	DNA fragmentation during apoptosis /// DNA fragmentation during apoptosis /// apoptosis	nucleic acid binding /// nuclease activity /// exonuclease activity /// hydrolase activity	intracellular	1.83
185512_at	F35H10.2	hypothetical protein /// status:Partially_confirmed	---	---	---	-2.46
185517_at	pqn-52	Prion-like-(Q/N-rich)-domain-bearing protein	---	---	---	1.88
185519_at	swm-1	Sperm activation Without Mating	---	peptidase activity	---	-2.05
185534_at	clec-138	C-type LECtin /// locus:clec-138	---	---	---	-3.8
185552_s_at	clec-135	C-type LECtin /// locus:clec-135	---	binding	---	-1.97
185554_s_at	Y39B6A.1	status:Confirmed /// hypothetical protein	---	protein binding	---	4.4
185556_at	C32E12.1	hypothetical protein /// status:Partially_confirmed	---	---	---	-2.09
185557_s_at	lys-7	LYSozyme /// locus:lys-7	carbohydrate metabolic process /// determination of adult life span	catalytic activity /// cation binding	---	-3.4
185588_at	K02G10.1	hypothetical protein /// status:Confirmed	---	zinc ion binding /// metal ion binding	integral to membrane	2.14
185599_s_at	cyp-13B1	CYtochrome P450 family	oxidation reduction	monooxygenase activity /// iron ion binding /// electron carrier activity /// oxidoreductase activity /// oxidoreductase activity /// heme binding /// metal ion binding	integral to membrane	2
185601_s_at	---	---	---	---	---	-2.73
185616_at	F55A12.1	hypothetical protein /// status:Partially_confirmed	embryonic development ending in birth or egg hatching	nucleic acid binding	---	1.85
185628_at	F21D12.3	hypothetical protein /// status:Partially_confirmed	embryonic development ending in birth or egg hatching	---	integral to membrane	1.81
185630_at	C39D10.6	hypothetical protein /// status:Partially_confirmed	---	---	integral to membrane	-1.8
185641_at	Y17G9A.4	status:Partially_confirmed /// hypothetical protein	---	---	integral to membrane	-3.36
185646_at	grd-14	GRounDhog (hedgehog-like family) /// locus:grd-14	locomotion /// positive regulation of multicellular organism growth /// vulval development	---	---	1.82
185653_at	cwp-2	Coexpressed With Polycystins /// locus:cwp-2	---	---	---	-2.16
185660_s_at	T12A2.15	hypothetical protein	---	---	integral to membrane	1.97
185662_at	srh-154	Serpentine Receptor, class H /// locus:srh-154	---	---	integral to membrane	-1.9
185664_at	C36C5.14	hypothetical protein /// status:Partially_confirmed	---	---	---	-2
185669_at	Y75B8A.39	status:Predicted /// hypothetical protein	---	---	---	3.25
185670_at	R03H10.1	hypothetical protein /// status:Predicted	---	---	---	-2.28
185690_at	C25E10.8	hypothetical protein /// status:Confirmed	---	protein binding	---	-3.41
185716_at	math-10	MATH (meprin-associated Traf homology) domain containing /// locus:math-10	---	---	---	3.6
185717_s_at	F21C10.7	hypothetical protein /// status:Partially_confirmed	---	---	---	2.92
185723_at	ttr-47	TransThyretin-Related family domain /// locus:ttr-47	transport	transporter activity	extracellular region	-1.95
185762_at	btb-21	BTB (Broad/complex/Tramtrack/Bric a brac) domain protein /// locus:btb-21	---	protein binding	---	1.88
185773_at	spp-8	SaPosin-like Protein family /// locus:spp-8	---	---	---	-1.9
185774_s_at	spp-8	SaPosin-like Protein family /// locus:spp-8	---	---	---	-1.85
185779_at	T05B11.4	hypothetical protein /// status:Predicted	---	---	integral to membrane	2.62
185795_at	pqn-13	Prion-like-(Q/N-rich)-domain-bearing protein	---	---	---	-2.27
185798_at	F28A12.3	hypothetical protein /// status:Partially_confirmed	---	---	integral to membrane	-2.75
185802_at	F59E11.5	hypothetical protein /// status:Confirmed	---	---	integral to membrane	2.25
185812_at	C04E12.2	hypothetical protein /// hypothetical protein /// status:Confirmed /// status:Partially_confirmed	---	---	integral to membrane	1.97
185812_at	C04E12.4	hypothetical protein /// hypothetical protein /// status:Confirmed /// status:Partially_confirmed	---	---	integral to membrane	1.97
185816_at	F45E12.6	hypothetical protein /// status:Partially_confirmed	---	---	---	-2.22
185818_at	T17A3.10	hypothetical protein /// status:Partially_confirmed	---	---	integral to membrane	-2.08
185822_s_at	T19H12.3	hypothetical protein /// status:Confirmed	metabolic process	transferase activity, transferring hexosyl groups	---	-1.89
185854_s_at	C30F12.1	hypothetical protein /// status:Partially_confirmed	morphogenesis of an epithelium /// oviposition	nucleic acid binding /// protein binding /// zinc ion binding	---	-1.98
185861_at	T19H12.6	hypothetical protein /// status:Partially_confirmed	---	gamma-glutamyltransferase activity	integral to membrane	-1.92
185866_at	Y75B12A.2	status:Partially_confirmed /// hypothetical protein	---	---	integral to membrane	-2.15
185884_at	K04F1.14	hypothetical protein	---	---	membrane	-1.82
185910_at	fbxa-6	F-box A protein /// locus:fbxa-6	cytokinesis /// oogenesis /// cell division	---	---	-2.34
185912_at	T20D4.13	hypothetical protein /// status:Partially_confirmed	---	---	integral to membrane	-1.85
185923_at	R01B10.3	hypothetical protein /// status:Partially_confirmed	reproduction	---	integral to membrane	-2.54
185929_at	F45D11.1	hypothetical protein /// status:Partially_confirmed	---	---	---	-5.63
185938_at	Y51A2D.20	status:Partially_confirmed /// hypothetical protein	---	---	---	-1.96
185956_at	Y71H2B.5	status:Partially_confirmed /// hypothetical protein	metabolic process	catalytic activity /// pyridoxal phosphate binding	---	-1.82
185962_at	srbc-40	Serpentine Receptor, class BC (class B-like) /// locus:srbc-40	---	receptor activity	integral to membrane	-1.8
185963_at	Y46D2A.1	status:Confirmed /// hypothetical protein	---	---	---	-1.93
185968_at	nhr-137	Nuclear Hormone Receptor family	transcription /// regulation of transcription, DNA-dependent	DNA binding /// transcription factor activity /// steroid hormone receptor activity /// receptor activity /// ligand-dependent nuclear receptor activity /// zinc ion binding /// sequence-specific DNA binding /// metal ion binding	nucleus /// integral to membrane	1.9
185974_s_at	Y64G10A.7	status:Partially_confirmed /// hypothetical protein	positive regulation of growth rate	calcium ion binding /// protein binding	---	2.69
185986_at	F56A11.4	hypothetical protein /// status:Partially_confirmed	---	---	integral to membrane	-1.98
185995_at	srw-130	Serpentine Receptor, class W /// locus:srw-130	---	receptor activity	integral to membrane	-2.35
185999_at	C03G6.17	hypothetical protein /// status:Confirmed	---	---	---	-2.65
186005_at	math-7	MATH (meprin-associated Traf homology) domain containing /// locus:math-7	---	---	---	1.82
186010_at	C32E8.11	hypothetical protein /// status:Partially_confirmed	ubiquitin-dependent protein catabolic process /// protein catabolic process	ubiquitin-protein ligase activity /// protein binding /// zinc ion binding /// ligase activity /// metal ion binding	---	2.2
186016_s_at	met-1	histone METhyltransferase-like	negative regulation of transcription from RNA polymerase II promoter /// histone H3-K36 methylation /// positive regulation of growth rate /// locomotion /// negative regulation of vulval development /// histone H3-K9 methylation	protein binding /// methyltransferase activity /// transferase activity /// histone-lysine N-methyltransferase activity	nucleus	1.89
186025_at	R03H10.4	hypothetical protein /// status:Partially_confirmed	---	---	---	-2.51
186036_at	nhx-3	Na/H eXchanger	transport /// ion transport /// sodium ion transport /// regulation of pH	antiporter activity /// solute:hydrogen antiporter activity /// sodium:hydrogen antiporter activity /// sodium ion binding	endomembrane system /// membrane /// integral to membrane	1.88
186043_at	F20A1.10	hypothetical protein /// status:Confirmed	---	---	---	-2.57
186049_at	F52C12.4	hypothetical protein /// status:Partially_confirmed	---	---	---	-2.26
186055_at	grd-10	GRounDhog (hedgehog-like family) /// locus:grd-10	molting cycle, collagen and cuticulin-based cuticle /// locomotion /// positive regulation of multicellular organism growth	---	---	2.41
186060_at	C44B12.3	hypothetical protein /// status:Predicted /// status:Confirmed /// hypothetical protein	positive regulation of growth rate /// protein insertion into membrane	---	membrane /// integral to membrane	2.77
186082_at	Y45F10D.7	status:Partially_confirmed /// hypothetical protein	nematode larval development /// DNA methylation /// rRNA processing /// embryonic development ending in birth or egg hatching /// growth /// positive regulation of growth rate	DNA binding	small-subunit processome	2.45
186108_at	Y57G11A.4	status:Confirmed /// hypothetical protein	---	---	---	2.96
186118_at	F35H12.1	hypothetical protein /// status:Predicted	---	---	---	2.24
186124_at	T02B11.4	hypothetical protein /// status:Confirmed	---	---	---	-2.62
186133_s_at	F39C12.1	hypothetical protein /// status:Partially_confirmed	---	---	---	1.9
186138_s_at	phat-5	PHAryngeal gland Toxin-related /// locus:phat-5	---	---	---	-1.84
186139_at	scl-15	SCP-Like extracellular protein /// locus:scl-15	---	---	extracellular region	-1.99
186143_at	H20E11.3	hypothetical protein	---	---	---	-3.7
186157_at	ttr-40 ttr-49	TransThyretin-Related family domain /// TransThyretin-Related family domain /// locus:ttr-40 /// locus:ttr-49	---	---	---	-3.08
186164_at	Y48C3A.18	hypothetical protein	---	---	integral to membrane	-2.18
186179_at	K05F1.10	hypothetical protein /// status:Partially_confirmed	---	---	---	2.76
186181_at	H14E04.3	hypothetical protein /// status:Partially_confirmed	---	---	integral to membrane	-1.81
186182_s_at	hrg-1	Heme Responsive Gene /// locus:hrg-1	transport	---	lysosome /// lysosomal membrane /// endosome /// endosome membrane /// membrane /// integral to membrane	10.67
186186_at	T22F3.10	hypothetical protein /// status:Partially_confirmed	transport	transporter activity	integral to membrane	2.73
186190_at	F49F1.11	hypothetical protein /// status:Predicted	---	sugar binding	---	-10.8
186212_at	---	---	---	---	---	2.3
186226_at	W06A11.4	hypothetical protein /// status:Partially_confirmed	---	---	---	2.02
186239_at	clec-53	C-type LECtin /// locus:clec-53	---	binding /// sugar binding	---	-3.1
186241_s_at	F49C12.14	hypothetical protein /// status:Confirmed	---	---	---	-2
186249_at	C03A7.12	hypothetical protein /// status:Partially_confirmed	metabolic process	transferase activity /// transferase activity, transferring glycosyl groups /// transferase activity, transferring hexosyl groups	integral to membrane	2.4
186252_s_at	F49B2.3	hypothetical protein /// status:Predicted /// status:Partially_confirmed /// hypothetical protein	---	---	integral to membrane	-1.87
186263_at	F43C11.7	hypothetical protein /// status:Confirmed	---	protein binding /// protein binding /// zinc ion binding	intracellular	-2.07
186271_at	efl-2	E2F-like (mammalian transcription factor)	regulation of transcription, DNA-dependent /// negative regulation of vulval development	transcription factor activity /// protein binding	nucleus /// transcription factor complex	-2.12
186272_at	ZK1240.8	status:Predicted /// hypothetical protein	---	protein binding /// zinc ion binding	intracellular	-3.82
186274_at	C17H11.1	hypothetical protein /// status:Partially_confirmed	G-protein coupled receptor protein signaling pathway	---	integral to membrane	2
186286_at	Y27F2A.6	status:Partially_confirmed /// hypothetical protein	---	---	integral to membrane	-1.87
186299_at	H20E11.2	hypothetical protein /// status:Partially_confirmed	---	---	---	-2.85
186301_at	srz-70	Serpentine Receptor, class Z /// locus:srz-70	---	receptor activity	integral to membrane	-1.98
186309_s_at	T05H4.15	hypothetical protein	embryonic development ending in birth or egg hatching	---	---	-2.96
186365_at	C53C11.2	hypothetical protein /// status:Partially_confirmed	---	---	integral to membrane	-2.54
186383_at	T19D12.4	hypothetical protein	defense response	---	integral to membrane	1.96
186392_at	grl-28	GRound-Like (grd related) /// locus:grl-28	---	---	integral to membrane	-2.39
186410_at	C07D10.1	hypothetical protein /// status:Partially_confirmed	---	---	---	-2.18
186413_at	H20E11.1	hypothetical protein	---	---	integral to membrane	-2.51
186419_at	---	---	---	---	---	4.52
186436_at	set-24	SET (trithorax/polycomb) domain containing /// locus:set-24	---	protein binding	nucleus	1.97
186440_at	Y46G5A.14	status:Confirmed /// hypothetical protein	---	---	---	-1.83
186443_at	F42A10.7	hypothetical protein /// status:Confirmed	---	---	---	-6.76
186452_at	ZC190.10	status:Predicted /// hypothetical protein	---	---	---	-3.11
186476_at	math-44	MATH (meprin-associated Traf homology) domain containing /// locus:math-44	---	---	---	-1.93
186495_at	---	---	---	---	---	3.75
186499_at	ZK1248.1	status:Partially_confirmed /// hypothetical protein	proteolysis	metalloendopeptidase activity	membrane	-1.81
186506_s_at	C48B4.12	hypothetical protein	---	---	integral to membrane	-2.75
186507_at	clec-217	C-type LECtin /// locus:clec-217	---	binding	---	-2.63
186518_s_at	dct-13	DAF-16/FOXO Controlled, germline Tumor affecting /// locus:dct-13	---	nucleic acid binding /// zinc ion binding /// metal ion binding	---	-1.86
186519_at	F15E11.12	hypothetical protein /// status:Confirmed	positive regulation of growth rate	---	---	-3.29
186520_at	Y116A8C.20	status:Partially_confirmed /// hypothetical protein	---	nucleic acid binding /// zinc ion binding	---	-2.23
186521_at	F21C10.10	hypothetical protein /// status:Confirmed	---	---	---	2.3
186529_at	Y116A8C.28	hypothetical protein	carbon utilization	carbonate dehydratase activity /// zinc ion binding	---	2.1
186530_at	Y116F11A.3	status:Partially_confirmed /// hypothetical protein	---	---	---	-2.3
186531_at	Y37E11B.7	status:Confirmed /// hypothetical protein	---	---	---	1.83
186542_at	srh-131	Serpentine Receptor, class H /// locus:srh-131	---	---	integral to membrane	-2.12
186550_at	T28A11.18	hypothetical protein /// status:Partially_confirmed	---	---	---	3.57
186660_s_at	F46C5.1	hypothetical protein /// status:Confirmed	---	---	membrane /// integral to membrane	2.14
186700_at	fbxb-111	F-box B protein /// locus:fbxb-111	---	---	---	-2.56
186713_at	ZK512.7	status:Confirmed /// hypothetical protein	reproduction	---	---	-3.02
186714_s_at	ZK512.7	status:Confirmed /// hypothetical protein	reproduction	---	---	-2.74
186720_at	T28A11.19	hypothetical protein /// status:Partially_confirmed	---	---	---	6.17
186726_at	Y38E10A.13	locus:nspe-1 /// hypothetical protein	---	---	integral to membrane	7.47
186735_s_at	fzo-1	FZO (Fzo mitochondrial fusion protein) related /// locus:fzo-1	mitochondrial fusion /// embryonic development ending in birth or egg hatching /// positive regulation of growth rate	nucleotide binding /// GTPase activity /// GTP binding /// hydrolase activity	mitochondrion /// mitochondrial outer membrane /// membrane /// integral to membrane	1.85
186742_at	sre-51	Serpentine Receptor, class E (epsilon) /// locus:sre-51	sensory perception of chemical stimulus	transmembrane receptor activity	integral to membrane	-2.41
186757_s_at	F42A8.1	hypothetical protein /// status:Confirmed	nematode larval development /// embryonic development ending in birth or egg hatching /// body morphogenesis /// molting cycle, collagen and cuticulin-based cuticle /// growth /// positive regulation of growth rate	---	---	3.04
186790_at	nuc-1	abnormal NUClease /// locus:nuc-1	DNA metabolic process /// DNA fragmentation during apoptosis /// apoptosis /// determination of adult life span	deoxyribonuclease II activity /// hydrolase activity	intracellular /// nucleus	-2.11
186792_at	C18E9.6	hypothetical protein /// status:Confirmed	reproduction /// transport /// ion transport /// anion transport /// embryonic development ending in birth or egg hatching /// protein transport /// positive regulation of growth rate /// positive regulation of multicellular organism growth /// protein import into mitochondrion	voltage-gated anion channel activity	mitochondrion /// mitochondrial outer membrane /// membrane /// integral to membrane	2.16
186799_at	Y105C5B.15	status:Confirmed /// hypothetical protein	---	acid phosphatase activity /// hydrolase activity /// metal ion binding	---	-2.64
186801_s_at	F45D11.14	hypothetical protein /// hypothetical protein /// hypothetical protein /// status:Predicted /// status:Predicted /// status:Predicted	---	---	---	-1.86
186801_s_at	F45D11.15	hypothetical protein /// hypothetical protein /// hypothetical protein /// status:Predicted /// status:Predicted /// status:Predicted	---	---	---	-1.86
186801_s_at	F45D11.16	hypothetical protein /// hypothetical protein /// hypothetical protein /// status:Predicted /// status:Predicted /// status:Predicted	---	---	---	-1.86
186806_at	fbxb-42	F-box B protein /// locus:fbxb-42	---	---	---	-2.17
186812_s_at	Y32H12A.8	status:Partially_confirmed /// hypothetical protein	---	---	---	2.11
186834_at	VW02B12L.2	hypothetical protein /// status:Partially_confirmed	protein amino acid dephosphorylation /// dephosphorylation	protein tyrosine phosphatase activity /// phosphatase activity	---	-2.23
186836_at	Y52B11A.10	status:Partially_confirmed /// hypothetical protein	nematode larval development /// RNA metabolic process /// growth /// positive regulation of multicellular organism growth	binding /// protein binding	---	1.89
186841_at	Y57G11C.9	hypothetical protein	---	nucleotide binding /// nucleic acid binding /// protein binding	---	1.88
186857_at	arf-6	ADP-Ribosylation Factor related /// locus:arf-6	intracellular protein transport /// small GTPase mediated signal transduction /// embryonic development ending in birth or egg hatching /// protein transport /// positive regulation of growth rate	nucleotide binding /// GTP binding	intracellular	-1.96
186859_at	C05B5.2	hypothetical protein /// status:Partially_confirmed	---	---	integral to membrane	-2.18
186878_at	let-413	LEThal	reproduction /// cell-cell junction assembly /// cell adhesion /// establishment or maintenance of cell polarity /// embryonic development /// embryonic development ending in birth or egg hatching /// protein transport /// actin filament-based process /// locomotion /// negative regulation of multicellular organism growth /// hermaphrodite genitalia development /// regulation of intermediate fila…	protein binding /// protein binding /// protein binding	plasma membrane /// adherens junction /// membrane /// basolateral plasma membrane	1.86
186886_s_at	Y18D10A.23	status:Partially_confirmed /// hypothetical protein	amino acid transport	---	membrane /// integral to membrane	2.03
186888_s_at	eif-3.C	Eukaryotic Initiation Factor /// locus:eif-3.C	reproduction /// translation /// translational initiation	translation initiation factor activity	eukaryotic translation initiation factor 3 complex	2.14
186903_at	Y55B1BL.1	status:Confirmed /// hypothetical protein	---	---	integral to membrane	-2.51
186917_at	clec-129	C-type LECtin /// locus:clec-129	---	binding	---	-2.1
186923_at	Y116A8C.23	status:Partially_confirmed /// hypothetical protein	---	---	integral to membrane	-1.94
186935_at	dos-1	Delta and OSM-11-like /// locus:dos-1	---	---	---	-3.17
186955_at	Y113G7B.16	status:Confirmed /// hypothetical protein	regulation of cyclin-dependent protein kinase activity	---	---	1.92
186956_s_at	Y113G7B.16	status:Confirmed /// hypothetical protein	regulation of cyclin-dependent protein kinase activity	---	---	2.05
186971_at	C23G10.11	hypothetical protein /// status:Confirmed	---	---	integral to membrane	45.34
187006_at	C46H11.10	hypothetical protein	---	---	---	1.94
187019_at	F37C12.10	hypothetical protein /// status:Predicted	positive regulation of growth rate	---	integral to membrane	-1.9
187028_s_at	C33E10.10	dehydrogenase	metabolic process	catalytic activity /// binding /// protein binding /// oxidoreductase activity	---	2.37
187033_at	F54D1.6	hypothetical protein /// status:Confirmed	reproduction /// nematode larval development /// cell-matrix adhesion /// growth /// positive regulation of growth rate	---	membrane /// integral to membrane	1.93
187084_at	gst-10	Glutathione S-Transferase /// locus:gst-10	glutathione metabolic process /// response to stress /// determination of adult life span /// response to UV-C /// response to hydrogen peroxide	glutathione transferase activity /// glutathione transferase activity /// transferase activity	---	-2.69
187085_s_at	gst-10	Glutathione S-Transferase /// locus:gst-10	glutathione metabolic process /// response to stress /// determination of adult life span /// response to UV-C /// response to hydrogen peroxide	glutathione transferase activity /// glutathione transferase activity /// transferase activity	---	-2
187096_at	Y113G7B.14	status:Partially_confirmed /// hypothetical protein	---	DNA binding /// ATP binding	---	2.83
187101_at	Y116F11B.8	status:Partially_confirmed /// hypothetical protein	---	---	---	-1.99
187110_at	---	---	---	---	---	-2.02
187123_at	T09B9.3	hypothetical protein /// status:Partially_confirmed	glycerol metabolic process /// lipid metabolic process	phosphoric diester hydrolase activity /// glycerophosphodiester phosphodiesterase activity	membrane /// integral to membrane	-1.95
187137_at	clec-130	C-type LECtin /// locus:clec-130	---	binding	---	-1.99
187138_at	elpc-2	ELongator complex Protein Component /// locus:elpc-2	translation	structural constituent of ribosome	intracellular /// ribosome	2.37
187150_at	Y113G7B.12	status:Partially_confirmed /// hypothetical protein	---	---	integral to membrane	-2.23
187151_s_at	F54C8.7	hypothetical protein	---	---	---	2.04
187155_at	Y53G8AR.8	status:Partially_confirmed /// hypothetical protein	---	---	---	2.43
187170_at	F59B2.12	hypothetical protein /// status:Partially_confirmed	---	---	---	-18.55
187180_at	C44C1.5	hypothetical protein	---	carboxylesterase activity /// hydrolase activity	integral to membrane	1.94
187192_at	C02B8.5	hypothetical protein /// status:Partially_confirmed	signal transduction /// G-protein coupled receptor protein signaling pathway	signal transducer activity /// receptor activity /// G-protein coupled receptor activity	plasma membrane /// membrane /// integral to membrane	-2.14
187195_at	Y54E10A.10	status:Confirmed /// hypothetical protein	reproduction	---	nucleus	2.28
187197_s_at	C13B9.1	hypothetical protein /// hypothetical protein /// status:Predicted /// status:Confirmed	morphogenesis of an epithelium /// nematode larval development /// body morphogenesis /// growth /// negative regulation of vulval development	---	---	2.76
187197_s_at	F23A7.7	hypothetical protein /// hypothetical protein /// status:Predicted /// status:Confirmed	morphogenesis of an epithelium /// nematode larval development /// body morphogenesis /// growth /// negative regulation of vulval development	---	---	2.76
187234_s_at	Y110A2AL.9	status:Partially_confirmed /// hypothetical protein	---	---	---	-5.84
187235_at	SR-famA	SR-famA	signal transduction /// G-protein coupled receptor protein signaling pathway	signal transducer activity /// receptor activity /// G-protein coupled receptor activity	plasma membrane /// membrane /// integral to membrane	-2.53
187244_at	B0228.1	hypothetical protein /// status:Partially_confirmed	---	---	---	-2.32
187248_at	unc-79	UNCoordinated	positive regulation of growth rate /// locomotion /// positive regulation of locomotion /// response to drug	---	---	1.97
187260_s_at	ZK1320.2	status:Confirmed /// hypothetical protein	---	---	---	-2
187282_at	F22B7.9	hypothetical protein /// status:Confirmed	---	---	---	-1.85
187283_at	Y110A2AL.7	status:Partially_confirmed /// hypothetical protein	---	---	---	-11.79
187297_s_at	B0495.7	hypothetical protein /// status:Confirmed	proteolysis /// locomotion	peptidase activity	membrane /// integral to membrane	2.06
187307_at	knl-1	Kinetochore NuLl /// locus:knl-1	reproduction /// embryonic development ending in birth or egg hatching /// hermaphrodite genitalia development	protein binding	---	1.94
187312_at	Y110A2AL.3	status:Partially_confirmed /// hypothetical protein	---	---	integral to membrane	-5.02
187321_s_at	elpc-1	ELongator complex Protein Component /// locus:elpc-1	embryonic development ending in birth or egg hatching	---	---	2.36
187323_at	F13D12.6	serine carboxypeptidase	proteolysis	carboxypeptidase activity /// serine-type carboxypeptidase activity /// peptidase activity /// hydrolase activity	integral to membrane	-1.88
187325_at	B0228.8	hypothetical protein /// status:Partially_confirmed	---	---	---	-1.92
187327_at	C13B9.2	hypothetical protein /// status:Partially_confirmed	---	---	---	1.83
187358_at	dct-5	DAF-16/FOXO Controlled, germline Tumor affecting /// locus:dct-5	---	---	membrane /// integral to membrane	1.8
187384_s_at	let-767	LEThal /// locus:let-767	reproduction /// nematode larval development /// steroid biosynthetic process /// metabolic process /// determination of adult life span /// lipid biosynthetic process /// embryonic development /// embryonic development ending in birth or egg hatching /// female genitalia development /// regulation of hormone metabolic process /// growth /// positive regulation of growth rate /// locomotion /// m…	catalytic activity /// alcohol dehydrogenase activity /// binding /// protein binding /// proteasome activator activity /// oxidoreductase activity	proteasome complex /// nucleus /// cytoplasm /// cytosol /// integral to membrane /// protein complex	1.89
187391_at	F40B5.1	hypothetical protein /// status:Confirmed	proteolysis	metalloendopeptidase activity	membrane	3.24
187398_s_at	F55F8.3	hypothetical protein /// status:Partially_confirmed	nematode larval development /// protein amino acid phosphorylation /// growth	protein kinase activity /// ATP binding	---	2.53
187403_at	alx-1	ALIX (Apoptosis-linked gene 2 interacting protein X) homolog	endosome organization /// endocytic recycling /// protein localization in organelle /// regulation of protein catabolic process	---	---	1.87
187404_at	B0416.2	hypothetical protein /// status:Partially_confirmed	---	---	---	-2.21
187410_at	his-10 his-14 his-26 his-31 his-46 his-56 his-60 his-64	HIStone /// HIStone /// HIStone /// HIStone /// HIStone /// HIStone /// HIStone /// HIStone /// locus:his-10 /// locus:his-14 /// locus:his-26 /// locus:his-31 /// locus:his-46 /// locus:his-56 /// locus:his-60 /// locus:his-64	reproduction /// nematode larval development /// nucleosome assembly /// defense response /// embryonic development ending in birth or egg hatching /// body morphogenesis /// growth /// positive regulation of growth rate /// locomotion /// hermaphrodite genitalia development	DNA binding	nucleosome /// nucleus /// chromosome	-1.87
187420_at	srxa-10	Serpentine Receptor, class XA /// locus:srxa-10	embryonic development ending in birth or egg hatching	---	membrane /// integral to membrane	-1.98
187444_at	clec-158	C-type LECtin /// locus:clec-158	---	binding	---	-3.25
187447_at	tag-209	Temporarily Assigned Gene name /// locus:tag-209	---	---	---	-1.91
187452_at	C31H2.4	4-hydroxyphenylpyruvate dioxygenase (4HPPD)	aromatic amino acid family metabolic process	4-hydroxyphenylpyruvate dioxygenase activity /// iron ion binding /// metal ion binding	---	2.06
187470_s_at	R06F6.8	hypothetical protein	---	protein binding	membrane /// integral to membrane	1.96
187477_s_at	F19F10.11	hypothetical protein	---	---	---	2.13
187497_at	C02C2.4	hypothetical protein /// status:Partially_confirmed	transport /// ion transport /// sodium ion transport	transporter activity /// symporter activity /// sodium ion binding	membrane /// integral to membrane	2.72
187504_at	B0563.8	hypothetical protein /// status:Predicted	---	---	---	-2.04
187505_at	B0310.3	hypothetical protein /// status:Partially_confirmed	---	---	membrane /// integral to membrane	-2.17
187508_at	apc-2	Anaphase Promoting Complex; see also mat /// locus:apc-2	reproduction /// ubiquitin-dependent protein catabolic process /// cell cycle /// mitosis /// meiosis /// embryonic development ending in birth or egg hatching /// hermaphrodite genitalia development /// cell division	protein binding /// ubiquitin protein ligase binding	cullin-RING ubiquitin ligase complex	2.15
187544_at	K07E3.7	hypothetical protein	ATP biosynthetic process /// cation transport	nucleotide binding /// magnesium ion binding /// ATP binding /// ATPase activity, coupled to transmembrane movement of ions, phosphorylative mechanism /// hydrolase activity /// hydrolase activity, acting on acid anhydrides, catalyzing transmembrane movement of substances /// ATPase activity /// metal ion binding	membrane /// integral to membrane	-2.17
187553_at	D1044.4	hypothetical protein /// status:Predicted	---	---	---	2.11
187567_at	F59E12.6	hypothetical protein /// status:Predicted /// hypothetical protein	protein amino acid phosphorylation /// ubiquitin-dependent protein catabolic process /// embryonic development ending in birth or egg hatching	ubiquitin thiolesterase activity /// protein kinase activity /// ATP binding	membrane /// integral to membrane	2.96
187572_at	ZK353.4	status:Partially_confirmed /// hypothetical protein	---	---	integral to membrane	-2.04
187582_at	nlp-11	Neuropeptide-Like Protein /// locus:nlp-11	neuropeptide signaling pathway	---	---	-1.89
187589_at	C35C5.8	hypothetical protein	---	---	integral to membrane	6.75
187593_at	K01A12.2	hypothetical protein /// status:Partially_confirmed	---	---	---	-2
187596_at	T20B12.3	hypothetical protein /// status:Partially_confirmed	reproduction /// nematode larval development /// embryonic development ending in birth or egg hatching /// growth /// positive regulation of growth rate /// locomotion /// positive regulation of multicellular organism growth	---	---	1.85
187598_at	C35C5.8	hypothetical protein	---	---	integral to membrane	5.05
187606_at	nas-28	Nematode AStacin protease /// locus:nas-28	proteolysis	metalloendopeptidase activity /// peptidase activity /// metallopeptidase activity /// zinc ion binding /// hydrolase activity /// metal ion binding	extracellular region	-1.84
187628_s_at	C30G12.6	hypothetical protein	embryonic development ending in birth or egg hatching	---	---	1.81
187640_s_at	E04D5.1	hypothetical protein	translation /// regulation of translation /// proteolysis /// embryonic development ending in birth or egg hatching	translation initiation factor activity /// serine-type endopeptidase activity	---	2.01
187645_at	C46C2.5	hypothetical protein /// status:Partially_confirmed	---	---	integral to membrane	-2.24
187649_at	C05D11.5	hypothetical protein /// status:Confirmed	---	hydroxypyruvate isomerase activity /// isomerase activity	---	2.57
187653_at	K07C11.7	hypothetical protein	---	hydrolase activity	---	2.13
187662_at	F32H5.3	hypothetical protein	---	---	integral to membrane	-3.36
187665_at	C30G12.4	hypothetical protein /// status:Partially_confirmed	---	---	integral to membrane	-2.53
187686_at	gop-1	Gro-1 OPeron gene /// locus:gop-1	---	---	---	1.9
187703_s_at	lin-41	abnormal cell LINeage	reproduction /// morphogenesis of an epithelium /// multicellular organismal development /// gamete generation /// determination of adult life span /// body morphogenesis /// oviposition /// molting cycle, collagen and cuticulin-based cuticle /// locomotion /// positive regulation of multicellular organism growth /// negative regulation of vulval development /// regulation of development, heteroc…	protein binding /// zinc ion binding /// metal ion binding	intracellular /// cytoplasm	-2.28
187724_s_at	F12A10.2	hypothetical protein /// hypothetical protein /// status:Partially_confirmed /// status:Predicted /// hypothetical protein	protein amino acid phosphorylation /// ubiquitin-dependent protein catabolic process /// embryonic development ending in birth or egg hatching	ubiquitin thiolesterase activity /// protein kinase activity /// ATP binding	membrane /// integral to membrane	2.9
187724_s_at	F59E12.6	hypothetical protein /// hypothetical protein /// status:Partially_confirmed /// status:Predicted /// hypothetical protein	protein amino acid phosphorylation /// ubiquitin-dependent protein catabolic process /// embryonic development ending in birth or egg hatching	ubiquitin thiolesterase activity /// protein kinase activity /// ATP binding	membrane /// integral to membrane	2.9
187760_at	C05D2.8	hypothetical protein /// status:Confirmed	positive regulation of growth rate	---	integral to membrane	3.43
187761_s_at	C05D2.8	hypothetical protein /// status:Confirmed	positive regulation of growth rate	---	integral to membrane	2.5
187767_at	otpl-3	OToPetrin-Like /// locus:otpl-3	---	---	integral to membrane	2.51
187774_s_at	ZK1290.11	status:Partially_confirmed /// hypothetical protein	---	---	integral to membrane	-17.78
187798_s_at	F01F1.1	hypothetical protein	---	---	---	1.82
187839_s_at	---	---	---	---	---	-1.86
187840_s_at	ZK1127.6	status:Partially_confirmed /// hypothetical protein /// hypothetical protein	reproduction /// nematode larval development /// body morphogenesis /// growth /// locomotion /// hermaphrodite genitalia development	protein binding	---	2.4
187840_s_at	ZK1127.9	status:Partially_confirmed /// hypothetical protein /// hypothetical protein	reproduction /// nematode larval development /// body morphogenesis /// growth /// locomotion /// hermaphrodite genitalia development	protein binding	---	2.4
187845_at	tag-312	Temporarily Assigned Gene name /// locus:tag-312	translation /// intracellular protein transport /// nucleocytoplasmic transport /// signal transduction /// small GTPase mediated signal transduction /// protein transport	nucleotide binding /// structural constituent of ribosome /// GTPase activity /// calcium ion binding /// protein binding /// GTP binding	intracellular /// cytoplasm /// ribosome	-2.36
187859_s_at	---	---	---	---	---	1.93
187861_at	vps-33.2	related to yeast Vacuolar Protein Sorting factor /// locus:vps-33.2	vesicle docking during exocytosis /// vesicle-mediated transport	---	---	-2.37
187863_s_at	F26F12.3	hypothetical protein	---	---	---	1.85
187875_s_at	unc-86	UNCoordinated	transcription /// regulation of transcription, DNA-dependent /// mechanosensory behavior /// response to mechanical stimulus /// oviposition /// locomotion /// positive regulation of locomotion /// meiotic chromosome segregation /// regulation of transcription /// neuron development	DNA binding /// transcription factor activity /// transcription regulator activity /// sequence-specific DNA binding	nucleus /// integral to membrane	1.98
187891_at	Y71H10B.1	hypothetical protein	reproduction /// nematode larval development /// embryonic development ending in birth or egg hatching /// growth /// positive regulation of growth rate	---	---	2.2
187912_at	R02F2.2	hypothetical protein /// status:Partially_confirmed	intracellular signaling cascade /// regulation of Rho protein signal transduction	guanyl-nucleotide exchange factor activity /// Rho guanyl-nucleotide exchange factor activity	intracellular	-1.92
187913_at	mab-10	Male ABnormal /// locus:mab-10	morphogenesis of an epithelium /// negative regulation of transcription /// hermaphrodite genitalia development	transcription repressor activity	nucleus	-2.28
187936_s_at	dig-1	DIsplaced Gonad	phosphate metabolic process /// cell adhesion /// multicellular organismal development /// nervous system development /// gonad development /// hermaphrodite genitalia development	magnesium ion binding /// inorganic diphosphatase activity /// copper ion binding /// calcium ion binding /// protein binding /// electron carrier activity	extracellular region /// proteinaceous extracellular matrix /// cytoplasm	1.86
187953_at	kqt-2	potassium channel, KvQLT family /// locus:kqt-2	transport /// ion transport /// defecation	ion channel activity	membrane /// integral to membrane	-2.81
187956_at	rbr-2	RB (Retinoblastoma Binding protein) Related /// locus:rbr-2	transcription /// regulation of transcription, DNA-dependent /// chromatin modification /// positive regulation of growth rate /// negative regulation of vulval development /// oxidation reduction	DNA binding /// iron ion binding /// protein binding /// zinc ion binding /// oxidoreductase activity /// oxidoreductase activity, acting on single donors with incorporation of molecular oxygen, incorporation of two atoms of oxygen /// metal ion binding	intracellular /// nucleus	1.98
187962_at	ins-35	INSulin related /// locus:ins-35	---	---	integral to membrane	-4.32
187986_s_at	dpy-22	DumPY : shorter than wild-type /// locus:dpy-22	nematode larval development /// transcription /// regulation of transcription, DNA-dependent /// multicellular organismal development /// embryonic development ending in birth or egg hatching /// body morphogenesis /// oviposition /// positive regulation of growth rate /// locomotion /// positive regulation of multicellular organism growth /// hermaphrodite genitalia development	---	nucleus	1.83
187992_at	skr-5	SKp1 Related (ubiquitin ligase complex component) /// locus:skr-5	ubiquitin-dependent protein catabolic process	protein binding	---	-2.13
187994_at	ttn-1	TiTiN family	protein amino acid phosphorylation /// regulation of Rho protein signal transduction	nucleotide binding /// protein kinase activity /// protein serine/threonine kinase activity /// protein tyrosine kinase activity /// Rho guanyl-nucleotide exchange factor activity /// structural constituent of cell wall /// ATP binding /// kinase activity /// transferase activity	intracellular	3.3
188001_s_at	him-17	High Incidence of Males (increased X chromosome loss) /// locus:him-17	reciprocal meiotic recombination /// embryonic development ending in birth or egg hatching /// meiotic chromosome segregation	structural molecule activity /// calcium ion binding	vesicle membrane	1.83
188034_s_at	sax-3	Sensory AXon guidance	positive regulation of growth rate /// locomotion	---	integral to membrane	2.31
188042_at	sra-4	Serpentine Receptor, class A (alpha) /// locus:sra-4	sensory perception of chemical stimulus	transmembrane receptor activity	membrane /// integral to membrane	-2.16
188046_s_at	gfi-1	GEI-4(Four) Interacting protein /// locus:gfi-1	positive regulation of growth rate	---	---	6.47
188078_at	lipase	lipase	lipid metabolic process	---	---	-3.43
188084_s_at	plx-2	PLeXin /// locus:plx-2	signal transduction /// multicellular organismal development /// cell differentiation	receptor activity	intracellular /// membrane /// integral to membrane	2.32
188105_s_at	mup-4	MUscle Positioning /// locus:mup-4	reproduction /// nematode larval development /// determination of adult life span /// molting cycle, collagen and cuticulin-based cuticle /// growth /// positive regulation of growth rate /// locomotion	receptor activity /// calcium ion binding /// protein binding	integral to membrane	2
188106_at	lipase	lipase	---	---	---	-3.26
188112_at	glb-17	GLoBin /// locus:glb-17	oxygen transport	iron ion binding /// oxygen binding /// heme binding	---	2.13
188158_at	gei-16	GEX Interacting protein	nematode larval development /// embryonic development ending in birth or egg hatching /// molting cycle, collagen and cuticulin-based cuticle /// growth /// positive regulation of growth rate	protein binding	---	2.11
188172_at	lipase	lipase	lipid metabolic process	triacylglycerol lipase activity	---	-2.03
188185_at	lin-25	abnormal cell LINeage /// locus:lin-25	cytokinesis /// cell fate specification /// nematode larval development /// defense response /// multicellular organismal development /// cell differentiation /// defecation /// positive regulation of growth rate /// vulval development /// positive regulation of vulval development /// hermaphrodite genitalia development	---	nucleus /// cytoplasm	1.83
188206_at	---	---	---	---	---	1.93
188224_s_at	carboxylesterase	carboxylesterase /// carboxylesterase	---	---	---	1.89
188227_at	ssq-2	Sperm-Specific family, class Q /// locus:ssq-2	locomotion	---	---	2.04
188239_s_at	mab-21	Male ABnormal /// locus:mab-21	multicellular organismal development /// embryonic development /// embryonic development ending in birth or egg hatching /// cell differentiation /// positive regulation of growth rate /// cell fate commitment	---	---	-1.87
188240_at	ptr-6	PaTched Related family /// locus:ptr-6	embryonic development ending in birth or egg hatching /// molting cycle, collagen and cuticulin-based cuticle /// locomotion /// positive regulation of multicellular organism growth	hedgehog receptor activity	membrane /// integral to membrane	3.71
188271_at	let-363	LEThal	reproduction /// nematode larval development /// regulation of translation /// regulation of translation /// determination of adult life span /// embryonic development ending in birth or egg hatching /// growth /// positive regulation of growth rate	binding /// kinase activity /// transferase activity /// transferase activity, transferring phosphorus-containing groups /// phosphotransferase activity, alcohol group as acceptor	nucleus	2.33
188278_s_at	tni-3	TropoNin I /// locus:tni-3	nematode larval development /// muscle contraction /// oviposition /// post-embryonic body morphogenesis	actin binding /// protein binding	---	-2.32
188281_s_at	col-81	COLlagen /// locus:col-81	---	---	integral to membrane	2.24
188282_at	hsp-16.2	Heat Shock Protein /// locus:hsp-16.2	response to stress /// determination of adult life span /// response to heat /// endoplasmic reticulum unfolded protein response /// positive regulation of growth rate	---	---	-6.93
188296_at	ags-3	Activator of G protein Signalling	signal transduction	GTPase activator activity /// binding /// protein binding	---	2.26
188308_s_at	DnaJ	DnaJ	---	---	---	1.96
188311_s_at	ram-2	abnormal RAy Morphology /// locus:ram-2	sensory organ development /// embryonic development ending in birth or egg hatching /// cell migration	structural constituent of cuticle	integral to membrane	3.43
188353_s_at	flp-12	FMRF-Like Peptide	---	---	---	-2.25
188356_at	col-98	COLlagen /// locus:col-98	body morphogenesis /// locomotion	structural constituent of cuticle	integral to membrane	2.97
188360_at	clu-1	yeast CLU (mitochondrial clustering) related /// locus:clu-1	translation /// embryonic development ending in birth or egg hatching	translation initiation factor activity	---	2.75
188375_at	col-153	COLlagen /// locus:col-153	---	structural constituent of cuticle	integral to membrane	-1.85
188379_at	fibrillin	fibrillin	---	---	---	-3.39
188380_at	chitinase	chitinase	carbohydrate metabolic process	catalytic activity /// hydrolase activity, hydrolyzing O-glycosyl compounds /// cation binding	---	-2.86
188412_at	esterase	esterase	---	---	---	2.14
188413_s_at	chitinase	hypothetical protein	carbohydrate metabolic process /// chitin catabolic process /// positive regulation of growth rate	catalytic activity /// hydrolase activity, hydrolyzing O-glycosyl compounds /// chitinase activity /// cation binding	---	3.79
188420_at	ced-11	CEll Death abnormality /// locus:ced-11	apoptosis /// apoptotic program /// positive regulation of programmed cell death	hydrolase activity	membrane /// integral to membrane	2.76
188422_at	Thiolases	Thiolases	metabolic process /// body morphogenesis	catalytic activity	---	1.96
188430_at	col-165	COLlagen /// locus:col-165	---	structural constituent of cuticle	integral to membrane	-2.81
188435_at	protease	protease	proteolysis	aspartic-type endopeptidase activity	---	3.39
188441_at	protease	protease	proteolysis	aspartic-type endopeptidase activity /// peptidase activity /// hydrolase activity	---	-2.47
188444_at	hsp-16.41	Heat Shock Protein /// locus:hsp-16.41	response to stress /// response to heat /// endoplasmic reticulum unfolded protein response /// positive regulation of growth rate	---	---	-9.43
188463_at	col-60	COLlagen /// locus:col-60	---	structural constituent of cuticle	integral to membrane	1.97
188467_at	protease	protease	---	---	---	-2.32
188471_at	helicase	helicase	embryonic development ending in birth or egg hatching	nucleic acid binding /// DNA binding /// helicase activity /// ATP binding	---	1.89
188472_s_at	unc-104	UNCoordinated	reproduction /// nematode larval development /// transport /// regulation of striated muscle contraction /// microtubule-based movement /// cell cycle /// nerve-nerve synaptic transmission /// feeding behavior /// anterograde axon cargo transport /// vesicle-mediated transport /// molting cycle, collagen and cuticulin-based cuticle /// defecation /// regulation of axon extension /// positive regu…	nucleotide binding /// motor activity /// microtubule motor activity /// ATP binding	microtubule /// microtubule associated complex	2.16
188475_at	col-180	COLlagen /// locus:col-180	body morphogenesis /// positive regulation of growth rate /// locomotion	structural constituent of cuticle	integral to membrane	2.54
188482_s_at	cct-6	Chaperonin Containing TCP-1	reproduction /// nematode larval development /// protein folding /// determination of adult life span /// embryonic development ending in birth or egg hatching /// growth /// locomotion /// hermaphrodite genitalia development /// cellular protein metabolic process	nucleotide binding /// protein binding /// ATP binding /// unfolded protein binding	cytoplasm	1.93
188486_s_at	cwn-1	WNT family	Wnt receptor signaling pathway, calcium modulating pathway /// multicellular organismal development /// embryonic development ending in birth or egg hatching /// Wnt receptor signaling pathway	signal transducer activity	extracellular region /// proteinaceous extracellular matrix /// integral to membrane	2.19
188496_s_at	permease	hypothetical protein	transport	transporter activity	membrane	-2.38
188505_at	Y55F3BR.1	status:Partially_confirmed /// hypothetical protein	reproduction /// positive regulation of growth rate /// locomotion	nucleic acid binding /// helicase activity /// ATP binding /// ATP-dependent helicase activity	---	2.32
188510_at	---	---	---	---	---	2.84
188538_at	ins-7	INSulin related /// locus:ins-7	determination of adult life span	hormone activity	extracellular region	-3
188543_s_at	lipase	lipase	lipid metabolic process	---	---	9.69
188548_s_at	helicase	helicase	reproduction /// morphogenesis of an epithelium /// nematode larval development /// embryonic development ending in birth or egg hatching /// growth /// positive regulation of growth rate /// locomotion /// positive regulation of multicellular organism growth /// hermaphrodite genitalia development	nucleic acid binding /// helicase activity /// ATP binding /// ATP-dependent helicase activity	---	2.15
188550_at	unc-47	UNCoordinated /// locus:unc-47	transport /// neurotransmitter transport /// oviposition /// locomotion	---	membrane /// integral to membrane /// cytoplasmic vesicle membrane /// cytoplasmic vesicle	-1.93
188559_at	protease	protease	proteolysis	cysteine-type peptidase activity	---	-1.93
188562_at	C23G10.1	hypothetical protein	---	phosphoprotein phosphatase activity /// iron ion binding /// hydrolase activity /// manganese ion binding /// metal ion binding	---	2.11
188563_s_at	C23G10.1	hypothetical protein	---	phosphoprotein phosphatase activity /// iron ion binding /// hydrolase activity /// manganese ion binding /// metal ion binding	---	-1.81
188599_s_at	cul-4	CULlin /// locus:cul-4	reproduction /// morphogenesis of an epithelium /// ubiquitin-dependent protein catabolic process /// positive regulation of growth rate /// locomotion /// hermaphrodite genitalia development	ubiquitin protein ligase binding	cullin-RING ubiquitin ligase complex	2.17
188611_s_at	fbf-2	Fem-3 mRNA Binding Factor /// locus:fbf-2	reproduction /// morphogenesis of an epithelium /// multicellular organismal development /// sex determination /// embryonic development ending in birth or egg hatching /// negative regulation of translation /// cell differentiation /// locomotion /// feminization of hermaphroditic germ-line /// hermaphrodite genitalia development /// meiotic chromosome segregation /// germline cell cycle switchi…	RNA binding /// binding	cytoplasm	3.7
188624_at	dpy-19	DumPY : shorter than wild-type /// locus:dpy-19	carbohydrate metabolic process /// multicellular organismal development /// nervous system development /// cell differentiation	catalytic activity	membrane /// integral to membrane	1.98
188644_at	ltd-1	Lim and Transglutaminase Domain /// locus:ltd-1	---	zinc ion binding	---	2.51
188648_at	gln-1	GLutamiNe synthetase (glutamate-ammonia ligase) /// locus:gln-1	glutamine biosynthetic process /// nitrogen compound metabolic process	catalytic activity /// glutamate-ammonia ligase activity /// ligase activity	---	2.04
188656_at	peptidase	peptidase	proteolysis	metalloendopeptidase activity	membrane	6.53
188661_s_at	tni-1	TropoNin I /// locus:tni-1	morphogenesis of an epithelium /// embryonic development ending in birth or egg hatching /// body morphogenesis /// oviposition /// locomotion /// backward locomotion	actin binding /// protein binding	---	2.88
188662_at	rom-2	RhOMboid (Drosophila) related /// locus:rom-2	signal transduction	serine-type endopeptidase activity /// calcium ion binding /// peptidase activity /// serine-type peptidase activity /// hydrolase activity	membrane /// integral to membrane	-3.02
188674_at	Peroxidase	hypothetical protein	response to oxidative stress	peroxidase activity /// heme binding	---	2.09
188685_s_at	chitinase	chitinase	chitin catabolic process /// cell wall catabolic process	chitinase activity	---	-2.39
188697_at	esterase	hypothetical protein	---	protein binding	---	1.93
188703_at	glb-14	GLoBin /// locus:glb-14	oxygen transport	iron ion binding /// oxygen binding /// heme binding	---	-1.82
188704_s_at	peptidase	hypothetical protein	proteolysis	metalloendopeptidase activity /// peptidase activity /// metallopeptidase activity /// zinc ion binding /// hydrolase activity /// metal ion binding	membrane /// integral to membrane	2.12
188705_s_at	peroxidase	peroxidase	response to oxidative stress	peroxidase activity /// heme binding	---	1.91
188756_s_at	pcp-4	Prolyl Carboxy Peptidase like /// locus:pcp-4	proteolysis	serine-type peptidase activity	---	3.39
188765_at	cft-1	Cystic Fibrosis Transmembrane conductance regulator homolog /// locus:cft-1	transport /// beta-lactam antibiotic catabolic process /// response to antibiotic	ATP binding /// beta-lactamase activity /// ATPase activity /// ATPase activity, coupled to transmembrane movement of substances	integral to membrane	2.45
188800_at	dehydrogenase	dehydrogenase	metabolic process	catalytic activity /// binding /// oxidoreductase activity	---	2.04
188809_at	srh-67	Serpentine Receptor, class H /// locus:srh-67	---	---	integral to membrane	-1.98
188822_at	acdh-1	Acyl CoA DeHydrogenase	defense response /// metabolic process /// determination of adult life span	acyl-CoA dehydrogenase activity /// protein binding /// electron carrier activity /// oxidoreductase activity /// oxidoreductase activity, acting on the CH-CH group of donors /// FAD binding	---	3.28
188823_s_at	EGF-repeats	EGF-repeats	---	binding	---	1.86
188835_at	str-7	Seven TM Receptor /// locus:str-7	---	---	integral to membrane	-1.84
188840_s_at	C28G1.4	zinc finger	---	zinc ion binding	intracellular	-1.86
188852_s_at	R09H10.5	EGF domains	---	---	integral to membrane	3.7
188854_s_at	Thioredoxin	Thioredoxin	cell redox homeostasis	isomerase activity	---	1.9
188863_s_at	ZK792.4	hypothetical protein	---	protein binding	---	-2.14
188882_at	dhs-23	DeHydrogenases, Short chain /// locus:dhs-23	metabolic process /// enterobactin biosynthetic process	catalytic activity /// binding /// 2,3-dihydro-2,3-dihydroxybenzoate dehydrogenase activity /// oxidoreductase activity	---	3.6
188897_s_at	R90.1	casein Kinase I	nematode larval development /// protein amino acid phosphorylation /// growth /// locomotion	protein kinase activity /// protein serine/threonine kinase activity /// protein tyrosine kinase activity /// ATP binding	---	1.95
188921_at	dehydrogenase	dehydrogenase	metabolic process	catalytic activity /// binding /// protein binding /// oxidoreductase activity	---	4.43
188934_at	ugt-13	UDP-GlucuronosylTransferase /// locus:ugt-13	metabolic process	transferase activity /// transferase activity, transferring glycosyl groups /// transferase activity, transferring hexosyl groups	integral to membrane	9.68
188942_s_at	tyr-3	TYRosinase /// locus:tyr-3	metabolic process /// oxidation reduction	monooxygenase activity /// copper ion binding /// oxidoreductase activity /// metal ion binding	---	-2.21
188947_at	clec-47	C-type LECtin /// locus:clec-47	---	binding	integral to membrane	4.21
188961_at	glutaminase	glutaminase	glutamine metabolic process	glutaminase activity /// hydrolase activity	---	1.93
188969_at	C15A11.4	amine oxidase	---	---	integral to membrane	-1.97
188975_at	C15A11.7	hypothetical protein	---	protein binding	integral to membrane	-1.89
189006_s_at	fib-1	FIBrillarin family /// locus:fib-1	reproduction /// nematode larval development /// rRNA processing /// embryonic development ending in birth or egg hatching /// growth /// positive regulation of growth rate /// positive regulation of embryonic development	RNA binding /// methyltransferase activity /// transferase activity	nucleus /// ribonucleoprotein complex	1.96
189015_at	clec-86	C-type LECtin /// locus:clec-86	---	binding /// sugar binding	---	10.21
189018_at	phospholipase	phospholipase	---	---	---	-1.98
189021_at	cdc-48.2	Cell Division Cycle related /// locus:cdc-48.2	cytokinesis /// nematode larval development /// embryonic development ending in birth or egg hatching /// positive regulation of growth rate /// locomotion /// cell division	nucleotide binding /// binding /// protein binding /// ATP binding /// hydrolase activity /// nucleoside-triphosphatase activity	---	1.97
189027_at	T22A3.6	kringle domain	---	---	integral to membrane	-1.8
189060_at	tag-329	Temporarily Assigned Gene name /// locus:tag-329	proteolysis	cysteine-type peptidase activity	---	-6.39
189069_at	aminoacylase-1	aminoacylase-1	proteolysis /// amino acid metabolic process	aminoacylase activity /// metallopeptidase activity /// hydrolase activity /// protein dimerization activity	cytoplasm	8.78
189071_at	C05B5.11	hypothetical protein /// status:Confirmed	---	---	---	-1.84
189081_at	aminoacylase-1	aminoacylase-1	proteolysis /// amino acid metabolic process	aminoacylase activity /// metallopeptidase activity /// hydrolase activity /// protein dimerization activity	cytoplasm	3.23
189086_s_at	atn-1	AcTiniN	embryonic development ending in birth or egg hatching /// positive regulation of growth rate	actin binding /// calcium ion binding /// protein binding /// identical protein binding	---	1.9
189087_s_at	hsp-16.1	Heat Shock Protein /// Heat Shock Protein /// locus:hsp-16.1 /// locus:hsp-16.11	response to stress /// defense response /// determination of adult life span /// response to heat /// endoplasmic reticulum unfolded protein response /// positive regulation of growth rate	---	---	-2.53
189087_s_at	hsp-16.11	Heat Shock Protein /// Heat Shock Protein /// locus:hsp-16.1 /// locus:hsp-16.11	response to stress /// defense response /// determination of adult life span /// response to heat /// endoplasmic reticulum unfolded protein response /// positive regulation of growth rate	---	---	-2.53
189088_at	---	---	---	---	---	-2.01
189092_s_at	aminoacylase-1	aminoacylase-1	proteolysis /// amino acid metabolic process	aminoacylase activity /// metallopeptidase activity /// hydrolase activity /// protein dimerization activity	cytoplasm	2.14
189099_at	col-77	COLlagen /// locus:col-77	---	structural constituent of cuticle	integral to membrane	2.84
189123_at	ctbp-1	CTBP (CtBP) transcriptional co-repressor homolog /// locus:ctbp-1	metabolic process	nucleic acid binding /// catalytic activity /// binding /// oxidoreductase activity, acting on the CH-OH group of donors, NAD or NADP as acceptor /// cofactor binding /// NAD binding	---	-2.01
189126_s_at	srh-2	Serpentine Receptor, class H	---	receptor activity	integral to membrane	4.35
189129_at	T14B4.1	rRNA methylase	RNA processing /// embryonic development ending in birth or egg hatching	RNA binding /// RNA methyltransferase activity	---	1.92
189131_at	R05D3.3	Zinc finger	---	DNA binding /// zinc ion binding /// metal ion binding	intracellular /// nucleus	2.16
189132_at	E02D9.1	hypothetical protein	reproduction /// nematode larval development /// protein amino acid phosphorylation /// molting cycle, collagen and cuticulin-based cuticle /// growth /// positive regulation of growth rate /// locomotion /// hermaphrodite genitalia development	RNA binding /// protein kinase activity /// protein serine/threonine kinase activity /// protein tyrosine kinase activity /// ATP binding	integral to membrane	2.28
189142_at	cyp-29A4	CYtochrome P450 family /// locus:cyp-29A4	---	monooxygenase activity /// iron ion binding /// electron carrier activity /// heme binding	integral to membrane	-2.08
189150_at	kgb-2	Kinase, GLH-Binding /// locus:kgb-2	protein amino acid phosphorylation	nucleotide binding /// protein kinase activity /// protein serine/threonine kinase activity /// MAP kinase activity /// protein tyrosine kinase activity /// ATP binding /// kinase activity /// transferase activity	---	2.49
189152_s_at	F19B6.1	hypothetical protein	reproduction /// carbohydrate metabolic process /// metabolic process /// hermaphrodite genitalia development	ATP binding /// phosphoribulokinase activity /// kinase activity /// phosphotransferase activity, alcohol group as acceptor	---	1.87
189176_at	cyp-25A1	CYtochrome P450 family /// locus:cyp-25A1	---	monooxygenase activity /// iron ion binding /// electron carrier activity /// heme binding	integral to membrane	-2.22
189178_at	F44G3.2	arginine kinase	---	catalytic activity /// kinase activity /// transferase activity, transferring phosphorus-containing groups	---	-2.22
189185_at	srh-2	Serpentine Receptor, class H	---	receptor activity	integral to membrane	8.45
189211_s_at	ZK512.2	RNA helicase /// hypothetical protein	reproduction /// nematode larval development /// growth /// positive regulation of growth rate	nucleotide binding /// nucleic acid binding /// RNA binding /// helicase activity /// ATP binding /// ATP-dependent helicase activity /// hydrolase activity	---	2.03
189219_s_at	cyp-13A11	CYtochrome P450 family /// CYtochrome P450 family /// locus:cyp-13A11 /// locus:cyp-13A12	---	monooxygenase activity /// iron ion binding /// electron carrier activity /// heme binding	integral to membrane	2.76
189219_s_at	cyp-13A12	CYtochrome P450 family /// CYtochrome P450 family /// locus:cyp-13A11 /// locus:cyp-13A12	---	monooxygenase activity /// iron ion binding /// electron carrier activity /// heme binding	integral to membrane	2.76
189227_at	W07B8.1	thiol protease	proteolysis	cysteine-type peptidase activity	---	13.44
189249_at	T11F8.4	protein kinase	protein amino acid phosphorylation /// proteolysis	serine-type endopeptidase activity /// protein kinase activity /// protein serine/threonine kinase activity /// protein tyrosine kinase activity /// ATP binding	---	-1.82
189259_s_at	pmp-4	Peroxisomal Membrane Protein related /// locus:pmp-4	transport	nucleotide binding /// ATP binding /// ATPase activity /// nucleoside-triphosphatase activity /// ATPase activity, coupled to transmembrane movement of substances	membrane /// integral to membrane	2.61
189265_at	cyp-34A2	CYtochrome P450 family /// locus:cyp-34A2	---	monooxygenase activity /// iron ion binding /// electron carrier activity /// heme binding	---	-2.37
189268_s_at	kynureninase	kynureninase	tryptophan catabolic process /// NAD biosynthetic process /// pyridine nucleotide biosynthetic process	catalytic activity /// hydrolase activity /// pyridoxal phosphate binding /// kynureninase activity	cytoplasm	-1.9
189269_at	C55B6.1	hypothetical protein	carbohydrate metabolic process /// glycerol-3-phosphate metabolic process	glycerol kinase activity /// phosphotransferase activity, alcohol group as acceptor	---	2.05
189282_at	cyp-35C1	CYtochrome P450 family /// locus:cyp-35C1	---	monooxygenase activity /// iron ion binding /// electron carrier activity /// heme binding	---	2.98
189283_s_at	cyp-35C1	CYtochrome P450 family /// locus:cyp-35C1	---	monooxygenase activity /// iron ion binding /// electron carrier activity /// heme binding	---	1.88
189296_s_at	carboxylesterase	carboxylesterase	metabolic process	hydrolase activity	---	2
189299_at	phospholipase	phospholipase	lipid metabolic process	hydrolase activity, acting on ester bonds	---	-7.01
189307_at	F26C11.3	hypothetical protein	reproduction	---	extracellular region	-1.95
189309_at	cyp-33C7	CYtochrome P450 family /// locus:cyp-33C7	positive regulation of growth rate	monooxygenase activity /// iron ion binding /// electron carrier activity /// heme binding	integral to membrane	2.55
189318_at	elo-2	fatty acid ELOngation /// locus:elo-2	reproduction /// lipid metabolic process /// determination of adult life span /// regulation of gene expression /// multicellular organism growth /// positive regulation of growth rate	---	integral to membrane	2.25
189331_s_at	T26G10.1	RNA helicase	reproduction /// nematode larval development /// rRNA processing /// embryonic development ending in birth or egg hatching /// body morphogenesis /// growth /// positive regulation of growth rate /// hermaphrodite genitalia development /// ribosome biogenesis	nucleotide binding /// nucleic acid binding /// RNA binding /// helicase activity /// ATP binding /// ATP-dependent helicase activity /// hydrolase activity	nucleus	1.81
189336_at	cyp-14A2	CYtochrome P450 family /// locus:cyp-14A2	---	monooxygenase activity /// iron ion binding /// electron carrier activity /// heme binding	integral to membrane	2.43
189343_at	cyp-34A4	CYtochrome P450 family /// locus:cyp-34A4	---	monooxygenase activity /// iron ion binding /// electron carrier activity /// heme binding	integral to membrane	-2.26
189345_at	F07H5.9	hypothetical protein	---	acid phosphatase activity	---	2.27
189352_s_at	daf-15	abnormal DAuer Formation	dauer larval development /// dauer entry	binding	---	2.06
189355_at	gnrr-3	human GoNadotropin-Releasing hormone Receptor (GnRHR) related /// locus:gnrr-3	G-protein coupled receptor protein signaling pathway	---	integral to membrane	-1.85
189366_at	cyp-35B1	CYtochrome P450 family /// locus:cyp-35B1	determination of adult life span	monooxygenase activity /// iron ion binding /// electron carrier activity /// heme binding	---	-3.83
189369_at	T01D3.7	hypothetical protein /// status:Partially_confirmed	homophilic cell adhesion /// embryonic development ending in birth or egg hatching /// positive regulation of growth rate	calcium ion binding	membrane	3.96
189378_at	cyp-14A3	CYtochrome P450 family /// locus:cyp-14A3	---	monooxygenase activity /// iron ion binding /// electron carrier activity /// heme binding	integral to membrane	2.44
189392_s_at	F28B4.3	EGF-like repeat	---	binding	---	1.92
189402_s_at	pmp-5	Peroxisomal Membrane Protein related	transport	ATP binding /// ATPase activity /// ATPase activity, coupled to transmembrane movement of substances	membrane /// integral to membrane	1.9
189403_s_at	mrp-5	Multidrug Resistance Protein family	nematode larval development /// transport /// collagen and cuticulin-based cuticle development /// positive regulation of growth rate /// positive regulation of locomotion	nucleotide binding /// ATP binding /// ATPase activity /// nucleoside-triphosphatase activity /// ATPase activity, coupled to transmembrane movement of substances	integral to membrane	4.64
189430_at	cyp-33A1	CYtochrome P450 family /// locus:cyp-33A1	---	monooxygenase activity /// iron ion binding /// electron carrier activity /// heme binding	---	4.49
189433_at	srd-56	Serpentine Receptor, class D (delta) /// locus:srd-56	---	receptor activity	integral to membrane	-1.8
189439_at	pll-1	PhosphoLipase C Like	lipid metabolic process /// signal transduction /// intracellular signaling cascade /// pronuclear migration	phosphoinositide phospholipase C activity /// phospholipase C activity /// signal transducer activity /// calcium ion binding /// phosphoric diester hydrolase activity	integral to membrane	-1.88
189442_at	sdz-26	SKN-1 Dependent Zygotic transcript /// locus:sdz-26	---	---	integral to membrane	-1.83
189445_at	str-221	Seven TM Receptor /// locus:str-221	---	receptor activity	integral to membrane	-2.22
189446_at	F34D6.2	homeobox protein	regulation of transcription, DNA-dependent /// regulation of transcription	DNA binding /// transcription factor activity /// sequence-specific DNA binding	nucleus	-1.84
189452_at	col-174	COLlagen /// locus:col-174	---	structural constituent of cuticle	integral to membrane	2.2
189458_s_at	T07F10.1	hypothetical protein	proteolysis	metallopeptidase activity /// zinc ion binding	integral to membrane	1.98
189462_s_at	rgr-1	RGR (yeast transcriptional mediator complex) homolog	nematode larval development /// transcription /// regulation of transcription, DNA-dependent /// embryonic development ending in birth or egg hatching /// growth	---	nucleus	1.88
189469_at	cpr-2	Cysteine PRotease related /// locus:cpr-2	proteolysis	cysteine-type endopeptidase activity /// cysteine-type peptidase activity	---	-13.97
189474_at	carboxylesterase	carboxylesterase	---	---	---	2.42
189482_s_at	col-175	COLlagen /// locus:col-175	---	structural constituent of cuticle	integral to membrane	1.81
189483_at	T19D12.5	casein kinase I	protein amino acid phosphorylation	protein kinase activity /// protein serine/threonine kinase activity /// ATP binding	---	-2.1
189519_at	cyp-33C8	CYtochrome P450 family /// locus:cyp-33C8	---	monooxygenase activity /// iron ion binding /// electron carrier activity /// heme binding	integral to membrane	2.78
189534_at	Carboxylesterases	hypothetical protein	---	---	---	2.23
189539_at	cyp-33B1	CYtochrome P450 family /// locus:cyp-33B1	---	monooxygenase activity /// iron ion binding /// electron carrier activity /// heme binding	integral to membrane	-1.87
189545_s_at	col-139	COLlagen /// locus:col-139	body morphogenesis /// locomotion	structural constituent of cuticle	integral to membrane	2.15
189554_at	C13C4.5	sugar transporter	transport	transporter activity	integral to membrane	2.2
189564_s_at	carboxylesterase	carboxylesterase	---	protein binding	---	-1.8
189565_at	snt-4	SyNapTotagmin /// locus:snt-4	---	protein binding	integral to membrane	1.83
189575_at	cyp-13A6	CYtochrome P450 family /// locus:cyp-13A6	positive regulation of growth rate /// oxidation reduction	monooxygenase activity /// iron ion binding /// electron carrier activity /// oxidoreductase activity /// heme binding /// metal ion binding	integral to membrane	2.7
189578_at	cyp-13A5	CYtochrome P450 family /// locus:cyp-13A5	positive regulation of growth rate /// locomotion /// positive regulation of multicellular organism growth /// oxidation reduction	monooxygenase activity /// iron ion binding /// electron carrier activity /// oxidoreductase activity /// heme binding /// metal ion binding	integral to membrane	2.04
189579_at	cye-1	CYclin E	reproduction /// G1/S transition of mitotic cell cycle /// G1/S transition of mitotic cell cycle /// cytokinesis /// nematode larval development /// cell cycle /// regulation of mitosis /// germ cell development /// positive regulation of cell proliferation /// post-embryonic development /// embryonic development ending in birth or egg hatching /// body morphogenesis /// growth /// positive regul…	cyclin-dependent protein kinase regulator activity	nucleus /// nucleus	1.95
189587_s_at	acetyltransferase	acetyltransferase	---	acyltransferase activity	---	6.6
189588_at	cyp-13A1	CYtochrome P450 family /// locus:cyp-13A1	oxidation reduction	monooxygenase activity /// iron ion binding /// electron carrier activity /// oxidoreductase activity /// heme binding /// metal ion binding	integral to membrane	3.94
189590_at	C45G9.1	Protein kinase	protein amino acid phosphorylation	protein kinase activity /// protein serine/threonine kinase activity /// ATP binding	---	-1.88
189595_s_at	K10C2.3	aspartyl protease	proteolysis	aspartic-type endopeptidase activity	integral to membrane	-4.18
189598_s_at	ZC376.7	hypothetical protein	regulation of transcription, DNA-dependent	transcription factor activity /// sequence-specific DNA binding /// protein dimerization activity	nucleus	2.04
189614_at	carboxylesterase	hypothetical protein	---	---	---	12.45
189623_at	B0491.7	diphthine synthase	metabolic process /// peptidyl-diphthamide biosynthetic process from peptidyl-histidine	diphthine synthase activity /// methyltransferase activity	---	2.37
189628_at	cah-4	Carbonic AnHydrase	one-carbon compound metabolic process /// body morphogenesis /// locomotion	carbonate dehydratase activity /// zinc ion binding	---	3.56
189665_at	R06F6.6	Homeobox domain	regulation of transcription, DNA-dependent /// regulation of transcription	DNA binding /// transcription factor activity /// transcription regulator activity /// sequence-specific DNA binding	nucleus	-2.39
189671_at	cyp-33C9	CYtochrome P450 family /// locus:cyp-33C9	---	monooxygenase activity /// iron ion binding /// electron carrier activity /// heme binding	integral to membrane	2.14
189677_s_at	erm-1	Ezrin/Radixin/Moesin	reproduction /// morphogenesis of an epithelium /// nematode larval development /// actin filament organization /// gonad development /// embryonic development ending in birth or egg hatching /// body morphogenesis /// lumen formation /// growth /// positive regulation of growth rate /// locomotion	binding /// protein binding /// cytoskeletal protein binding	cytoplasm /// cytoskeleton /// extrinsic to membrane	1.87
189679_at	F21A3.3	EGF-domain protein	---	---	---	2.45
189681_at	F45E10.2	hypothetical protein	transport	transporter activity	membrane /// integral to membrane	-2.11
189686_at	T08B1.1	sugar transporter	nematode larval development /// transport /// embryonic development ending in birth or egg hatching /// growth /// positive regulation of growth rate	transporter activity	integral to membrane	2.37
189691_s_at	clec-99	C-type LECtin /// locus:clec-99	---	binding	---	-3.47
189692_at	clec-94	C-type LECtin /// locus:clec-94	---	binding	---	-4.44
189695_at	glycosyltransferase	glycosyltransferase	---	---	---	-2.26
189701_at	clec-95	C-type LECtin /// locus:clec-95	---	binding	---	-3.79
189713_at	col-51	COLlagen /// locus:col-51	---	structural constituent of cuticle	integral to membrane	1.96
189725_at	nac-3	NADC (Na+-coupled dicarboxylate transporter) family	transport /// ion transport /// sodium ion transport /// determination of adult life span	transporter activity /// symporter activity /// sodium ion binding	membrane /// integral to membrane	2.4
189732_at	F49E12.9	hypothetical protein	fatty acid biosynthetic process /// oxidation reduction	iron ion binding /// oxidoreductase activity	endoplasmic reticulum /// integral to membrane	4.03
189735_at	hsp-17	Heat Shock Protein	response to stress /// response to heat	protein binding /// identical protein binding	---	4.16
189736_s_at	cpt-4	Carnitine Palmitoyl Transferase /// locus:cpt-4	proteolysis	cysteine-type endopeptidase activity /// acyltransferase activity /// transferase activity	---	-2.8
189746_at	E02H9.5	glycosyl hydrolase	carbohydrate metabolic process	catalytic activity /// hydrolase activity, hydrolyzing O-glycosyl compounds /// cation binding	---	2.44
189747_at	F14E5.1	glucose transporter	transport	transporter activity	membrane /// integral to membrane	-2.1
189753_at	K08F9.1	glucose transporter	transport /// transmembrane transport	transporter activity /// substrate-specific transmembrane transporter activity	membrane /// integral to membrane	-1.97
189761_s_at	W10C8.5	phosphotransferase /// ATP transferase	---	catalytic activity /// kinase activity /// transferase activity, transferring phosphorus-containing groups	integral to membrane	2.42
189762_at	col-49	COLlagen /// locus:col-49	body morphogenesis	structural constituent of cuticle	integral to membrane	2.67
189768_at	fasn-1	Fatty Acid SyNthase /// locus:fasn-1	nematode larval development /// metabolic process /// biosynthetic process /// embryonic development ending in birth or egg hatching /// growth /// oxidation reduction	acyl carrier activity /// catalytic activity /// binding /// zinc ion binding /// oxidoreductase activity /// transferase activity /// hydrolase activity, acting on ester bonds /// cofactor binding	---	2.08
189771_at	rab-11.2	RAB family /// locus:rab-11.2	intracellular protein transport /// nucleocytoplasmic transport /// signal transduction /// small GTPase mediated signal transduction /// protein transport /// positive regulation of growth rate	nucleotide binding /// GTPase activity /// protein binding /// GTP binding	intracellular	4.18
189789_s_at	rme-8	Receptor Mediated Endocytosis	nematode larval development /// receptor-mediated endocytosis /// cytoplasm organization /// embryonic development ending in birth or egg hatching /// body morphogenesis /// molting cycle, collagen and cuticulin-based cuticle /// growth /// locomotion	binding /// heat shock protein binding	---	1.85
189798_s_at	eat-3	EATing: abnormal pharyngeal pumping /// locus:eat-3	reproduction /// response to superoxide /// nematode larval development /// mitochondrion organization /// mitochondrial fusion /// embryonic development ending in birth or egg hatching /// body morphogenesis /// multicellular organism growth /// growth /// positive regulation of growth rate /// positive regulation of locomotion /// positive regulation of embryonic development	nucleotide binding /// GTPase activity /// GTP binding	---	1.84
189799_at	B0222.3	phosphate permease	phosphate transport	inorganic phosphate transmembrane transporter activity	membrane /// integral to membrane	2.16
189800_s_at	mua-3	MUscle Attachment abnormal	reproduction /// nematode larval development /// cell adhesion /// growth /// positive regulation of growth rate /// locomotion	receptor activity /// calcium ion binding /// protein binding /// protein binding	plasma membrane /// membrane /// integral to membrane	3.18
189807_at	aqp-7	AQuaPorin or aquaglyceroporin related /// locus:aqp-7	transport /// metabolic process	transporter activity /// oxidoreductase activity	membrane /// integral to membrane	2.19
189812_s_at	col-101	COLlagen /// locus:col-101	positive regulation of growth rate	structural constituent of cuticle	integral to membrane	4.11
189815_at	cyp-13A7	CYtochrome P450 family /// locus:cyp-13A7	oxidation reduction	monooxygenase activity /// iron ion binding /// electron carrier activity /// oxidoreductase activity /// heme binding /// metal ion binding	integral to membrane	2.34
189818_at	K08F8.1	hypothetical protein	protein amino acid phosphorylation /// embryonic development ending in birth or egg hatching	protein kinase activity /// protein serine/threonine kinase activity /// protein tyrosine kinase activity /// ATP binding	integral to membrane	2.02
189827_at	---	---	locomotion	---	---	-2.08
189849_at	Y40H7A.10	Cysteine protease /// hypothetical protein	proteolysis	cysteine-type endopeptidase activity /// cysteine-type peptidase activity	---	-1.93
189850_at	ceh-30	Homeobox /// locus:ceh-30	transcription /// regulation of transcription, DNA-dependent /// multicellular organismal development /// sex determination /// cell differentiation /// regulation of transcription	DNA binding /// transcription factor activity /// transcription regulator activity /// sequence-specific DNA binding	nucleus	3.44
189861_at	Carboxypeptidase	hypothetical protein	proteolysis	carboxypeptidase activity /// serine-type carboxypeptidase activity /// peptidase activity /// hydrolase activity	---	6.46
189881_at	F53F4.1	chorion protein like	---	---	integral to membrane	2.73
189885_at	fbxa-55	F-box A protein	---	---	---	1.82
189904_at	clec-56	C-type LECtin /// locus:clec-56	---	binding	---	1.87
189912_at	ZK354.8	protein phosphatase /// hypothetical protein	protein amino acid dephosphorylation /// dephosphorylation	protein tyrosine phosphatase activity /// phosphatase activity	---	1.96
189915_s_at	clec-41	C-type LECtin /// locus:clec-41	positive regulation of growth rate /// locomotion /// negative regulation of multicellular organism growth	binding	---	-2.04
189918_s_at	aat-5	Amino Acid Transporter	transport /// amino acid transport	amino acid transmembrane transporter activity	membrane /// integral to membrane	1.92
189923_s_at	sgt-1	Small Glutamine-rich Tetratrico repeat protein /// locus:sgt-1	reproduction /// nematode larval development /// embryonic development ending in birth or egg hatching /// growth	binding /// protein binding	---	2.05
189924_at	thrombospondin-like	thrombospondin-like	---	---	---	-2.07
189926_at	T07D10.3	zinc finger protein	---	zinc ion binding	intracellular	-4.08
189944_at	F48E3.2	Glucose transporter	transport /// embryonic development ending in birth or egg hatching	transporter activity	membrane /// integral to membrane	-1.91
189949_at	vps-26	related to yeast Vacuolar Protein Sorting factor	transport /// vacuolar transport /// protein transport	---	retromer complex	2.25
189960_at	C05C10.1	pho-10	---	acid phosphatase activity /// hydrolase activity	---	-2.51
189973_at	nas-5	Nematode AStacin protease /// locus:nas-5	proteolysis	metalloendopeptidase activity /// peptidase activity /// metallopeptidase activity /// zinc ion binding /// hydrolase activity /// metal ion binding	extracellular region	-1.95
189974_s_at	cct-2	Chaperonin Containing TCP-1 /// locus:cct-2	reproduction /// nematode larval development /// protein folding /// embryonic development ending in birth or egg hatching /// growth /// hermaphrodite genitalia development /// cellular protein metabolic process	nucleotide binding /// protein binding /// ATP binding /// unfolded protein binding	cytoplasm	1.89
189975_at	clec-227	C-type LECtin /// locus:clec-227	---	binding	---	2.48
189976_at	ZK637.1	Sugar transporter /// hypothetical protein	transport /// ion transport	transporter activity /// ion transmembrane transporter activity	membrane /// integral to membrane	2.28
189980_at	nhr-115	Nuclear Hormone Receptor family	transcription /// regulation of transcription, DNA-dependent	DNA binding /// transcription factor activity /// steroid hormone receptor activity /// receptor activity /// zinc ion binding /// sequence-specific DNA binding /// metal ion binding	nucleus	2.26
189984_s_at	N-methyltransferase	N-methyltransferase	---	methyltransferase activity	---	-2.26
189992_at	clec-246	C-type LECtin /// locus:clec-246	---	binding	---	-1.91
189994_at	rpn-2	proteasome Regulatory Particle, Non-ATPase-like	reproduction /// nematode larval development /// embryonic development ending in birth or egg hatching /// regulation of protein catabolic process	binding /// protein binding /// enzyme regulator activity	proteasome complex /// proteasome complex /// cytosol /// protein complex	1.89
189997_at	nas-19	Nematode AStacin protease /// locus:nas-19	proteolysis	metalloendopeptidase activity /// peptidase activity /// metallopeptidase activity /// zinc ion binding /// hydrolase activity /// metal ion binding	extracellular region /// integral to membrane	-2.65
190001_at	nhr-130	Nuclear Hormone Receptor family /// locus:nhr-130	transcription /// regulation of transcription, DNA-dependent	DNA binding /// transcription factor activity /// steroid hormone receptor activity /// receptor activity /// zinc ion binding /// sequence-specific DNA binding /// metal ion binding	nucleus	1.96
190024_at	nas-24	Nematode AStacin protease /// locus:nas-24	proteolysis	metalloendopeptidase activity /// peptidase activity /// metallopeptidase activity /// zinc ion binding /// hydrolase activity /// metal ion binding	extracellular region	-11.39
190032_s_at	nas-37	Nematode AStacin protease	proteolysis /// multicellular organismal development /// body morphogenesis /// molting cycle, collagen and cuticulin-based cuticle /// collagen and cuticulin-based cuticle development /// negative regulation of multicellular organism growth /// ecdysis, collagen and cuticulin-based cuticle	metalloendopeptidase activity /// peptidase activity /// metallopeptidase activity /// zinc ion binding /// hydrolase activity /// metal ion binding	extracellular region /// integral to membrane	3.22
190045_at	Y4C6A.3	zinc finger protein /// hypothetical protein	---	protein binding /// zinc ion binding	integral to membrane	1.9
190064_at	hlh-4	Helix Loop Helix /// locus:hlh-4	transcription /// regulation of transcription, DNA-dependent /// positive regulation of growth rate /// hermaphrodite genitalia development /// regulation of transcription	DNA binding /// transcription regulator activity	nucleus	-3.06
190069_at	oct-2	Organic Cation Transporter	transport	transporter activity	membrane /// integral to membrane	2.09
190070_at	F23F1.6	amino acid permease	transport /// amino acid transport	amino acid transmembrane transporter activity	membrane /// integral to membrane	1.9
190072_at	mnm-2	M Neuron Morphology abnormal /// locus:mnm-2	---	nucleic acid binding /// zinc ion binding	intracellular	-2.06
190091_at	sqt-2	SQuaT /// locus:sqt-2 /// status:Confirmed	embryonic development ending in birth or egg hatching /// body morphogenesis	structural constituent of cuticle	integral to membrane	2.07
190094_s_at	M02D8.4	hypothetical protein	asparagine biosynthetic process /// metabolic process	asparagine synthase (glutamine-hydrolyzing) activity /// protein binding	integral to membrane	2.98
190121_s_at	T25B6.2	zinc metalloprotease	proteolysis /// methylation	nucleic acid binding /// metalloendopeptidase activity /// methyltransferase activity /// metallopeptidase activity	membrane /// integral to membrane	2.87
190125_s_at	C41D11.7	DNA-binding protein	reproduction	nucleotide binding /// nucleic acid binding /// ATP binding /// ATP-dependent helicase activity /// nucleoside-triphosphatase activity	---	2.08
190130_at	C44E4.4	RNA-binding protein	reproduction /// nematode larval development /// RNA processing /// gonad development /// embryonic development ending in birth or egg hatching /// oviposition /// growth /// positive regulation of growth rate /// negative regulation of vulval development	nucleotide binding /// nucleic acid binding /// RNA binding	nucleus /// ribonucleoprotein complex	1.94
190136_at	K11D12.9	zinc finger protein	---	protein binding /// protein binding /// zinc ion binding	---	-1.96
190139_s_at	clec-17	C-type LECtin /// locus:clec-17	---	binding	integral to membrane	-3.93
190145_s_at	F32D8.12	hypothetical protein	---	catalytic activity /// oxidoreductase activity /// FAD binding	---	2.19
190148_s_at	C56E6.6	leucine-rich repeats	---	protein binding	---	-2.47
190158_at	clec-232	C-type LECtin /// locus:clec-232	---	binding /// protein binding	---	-2.92
190163_at	F19F10.1	DNA-binding protein	regulation of transcription, DNA-dependent	DNA binding /// transcription factor activity /// sequence-specific DNA binding	nucleus	-2.06
190168_at	sod-5	SOD (superoxide dismutase) /// locus:sod-5	superoxide metabolic process	superoxide dismutase activity /// metal ion binding	---	2.32
190187_at	fbf-1	Fem-3 mRNA Binding Factor /// locus:fbf-1	reproduction /// multicellular organismal development /// sex determination /// embryonic development ending in birth or egg hatching /// negative regulation of translation /// cell differentiation /// locomotion /// feminization of hermaphroditic germ-line /// germline cell cycle switching, mitotic to meiotic cell cycle	RNA binding /// binding /// protein binding	cytoplasm	2.29
190188_s_at	fbf-1	Fem-3 mRNA Binding Factor /// Fem-3 mRNA Binding Factor /// locus:fbf-1 /// locus:fbf-2	reproduction /// morphogenesis of an epithelium /// multicellular organismal development /// sex determination /// embryonic development ending in birth or egg hatching /// negative regulation of translation /// cell differentiation /// locomotion /// feminization of hermaphroditic germ-line /// hermaphrodite genitalia development /// meiotic chromosome segregation /// germline cell cycle switchi…	RNA binding /// binding /// protein binding	cytoplasm	3.53
190188_s_at	fbf-2	Fem-3 mRNA Binding Factor /// Fem-3 mRNA Binding Factor /// locus:fbf-1 /// locus:fbf-2	reproduction /// morphogenesis of an epithelium /// multicellular organismal development /// sex determination /// embryonic development ending in birth or egg hatching /// negative regulation of translation /// cell differentiation /// locomotion /// feminization of hermaphroditic germ-line /// hermaphrodite genitalia development /// meiotic chromosome segregation /// germline cell cycle switchi…	RNA binding /// binding /// protein binding	cytoplasm	3.53
190190_s_at	drp-1	Dynamin Related Protein	mitochondrial fission /// morphogenesis of an epithelium /// nematode larval development /// apoptotic mitochondrial changes /// embryonic development /// embryonic development ending in birth or egg hatching /// growth /// positive regulation of growth rate /// positive regulation of multicellular organism growth	nucleotide binding /// GTPase activity /// protein binding /// GTP binding	---	1.96
190202_at	F11C1.3	membrane glycoprotein	cell adhesion	---	membrane /// integral to membrane	2.55
190207_at	nhr-166	Nuclear Hormone Receptor family /// locus:nhr-166	transcription /// regulation of transcription, DNA-dependent	DNA binding /// transcription factor activity /// steroid hormone receptor activity /// receptor activity /// zinc ion binding /// sequence-specific DNA binding /// metal ion binding	nucleus	-2.05
190208_at	H28G03.1	hypothetical protein	---	nucleotide binding /// nucleic acid binding	---	-2.46
190222_s_at	T21B4.4	hypothetical protein	G-protein coupled receptor protein signaling pathway	neuropeptide Y receptor activity	integral to membrane	-1.95
190258_at	aman-3	Alpha MANnosidase /// locus:aman-3	carbohydrate metabolic process /// mannose metabolic process	catalytic activity /// alpha-mannosidase activity /// mannosidase activity /// carbohydrate binding	integral to membrane	3.49
190264_s_at	cdh-6	CaDHerin family /// locus:cdh-6	reproduction /// homophilic cell adhesion /// neuropeptide signaling pathway /// positive regulation of growth rate	G-protein coupled receptor activity /// calcium ion binding	membrane /// integral to membrane	2.78
190265_at	C55A6.7	alcohol dehydrogenase	defense response /// metabolic process	catalytic activity /// binding /// oxidoreductase activity	---	-1.95
190269_s_at	clec-197	C-type LECtin /// locus:clec-197	---	binding	---	-4.79
190270_at	T21D12.12	protease inhibitor	---	serine-type endopeptidase inhibitor activity	---	-1.84
190274_at	---	---	---	---	---	1.82
190282_at	cah-5	Carbonic AnHydrase /// locus:cah-5	one-carbon compound metabolic process	carbonate dehydratase activity /// zinc ion binding /// lyase activity /// metal ion binding	extracellular region /// integral to membrane	2.09
190320_at	T19H5.1	hypothetical protein	carbohydrate metabolic process /// chitin catabolic process	catalytic activity /// chitinase activity /// cation binding	integral to membrane	-4.15
190331_s_at	---	---	---	---	---	-2.48
190334_at	unc-63	UNCoordinated /// locus:unc-63	acetylcholine catabolic process /// transport /// ion transport /// post-embryonic development /// transmembrane ion transport /// locomotion /// regulation of locomotion /// regulation of oviposition	receptor activity /// nicotinic acetylcholine-activated cation-selective channel activity /// ion channel activity /// extracellular ligand-gated ion channel activity /// acetylcholine receptor activity /// acetylcholine-gated cation channel activity /// neurotransmitter receptor activity	plasma membrane /// membrane /// integral to membrane /// cell junction /// synapse /// postsynaptic membrane	-1.91
190340_s_at	wrt-4	locus:wrt-4 /// WaRThog (hedgehog-like family)	proteolysis /// cell communication /// cell-cell signaling /// multicellular organismal development /// segment polarity determination /// embryonic development ending in birth or egg hatching /// intein-mediated protein splicing /// protein autoprocessing /// molting cycle, collagen and cuticulin-based cuticle /// locomotion /// positive regulation of multicellular organism growth /// negative r…	peptidase activity /// hydrolase activity	extracellular region /// extracellular region /// plasma membrane /// plasma membrane /// cell surface /// membrane	2.01
190342_s_at	---	---	---	---	---	-1.94
190358_at	R04B5.5	sorbitol dehydrogenase	metabolic process /// oxidation reduction	catalytic activity /// binding /// zinc ion binding /// oxidoreductase activity	---	1.9
190360_s_at	dpy-5	DumPY : shorter than wild-type /// locus:dpy-5	morphogenesis of an epithelium /// body morphogenesis	structural constituent of cuticle	integral to membrane	2.18
190361_s_at	F56F10.3	cytenine dioxygenase	L-cysteine metabolic process /// oxidation reduction	iron ion binding /// oxidoreductase activity /// oxidoreductase activity, acting on single donors with incorporation of molecular oxygen, incorporation of two atoms of oxygen /// cysteine dioxygenase activity /// metal ion binding	---	-1.88
190363_at	lgc-1	Ligand-Gated ion Channel /// locus:lgc-1	transport /// ion transport	extracellular ligand-gated ion channel activity /// neurotransmitter receptor activity	membrane /// integral to membrane /// postsynaptic membrane	1.81
190367_at	nhr-210	Nuclear Hormone Receptor family /// locus:nhr-210	transcription /// regulation of transcription, DNA-dependent	DNA binding /// transcription factor activity /// steroid hormone receptor activity /// receptor activity /// zinc ion binding /// sequence-specific DNA binding /// metal ion binding	nucleus /// integral to membrane	1.85
190374_at	lgc-34	Ligand-Gated ion Channel /// locus:lgc-34	transport /// ion transport	catalytic activity /// GABA-A receptor activity /// extracellular ligand-gated ion channel activity /// metal ion binding	membrane /// integral to membrane /// postsynaptic membrane	2.21
190383_s_at	emb-8	abnormal EMBroygenesis /// locus:emb-8	nematode larval development /// embryonic development ending in birth or egg hatching /// growth /// positive regulation of growth rate /// locomotion /// oogenesis	iron ion binding /// electron carrier activity /// FMN binding /// oxidoreductase activity	integral to membrane	1.89
190404_s_at	folt-2	FOLate Transporter family /// locus:folt-2	transport	folic acid binding /// reduced folate carrier activity	membrane /// integral to membrane	15.32
190405_s_at	W07A8.2	hypothetical protein	lipid metabolic process /// metabolic process	hydrolase activity	---	1.87
190427_s_at	ftn-1	FerriTiN /// locus:ftn-1	iron ion transport /// cellular iron ion homeostasis /// cellular iron ion homeostasis /// determination of adult life span /// embryonic development ending in birth or egg hatching	binding /// protein binding /// ferric iron binding /// oxidoreductase activity /// identical protein binding /// transition metal ion binding	---	-3.49
190450_s_at	F09C8.1	phospholipase precursor	lipid metabolic process	hydrolase activity, acting on ester bonds	integral to membrane	-2.21
190467_at	ttr-29	TransThyretin-Related family domain /// locus:ttr-29	---	---	---	-2.34
190492_at	tbc-8	TBC (Tre-2/Bub2/Cdc16) domain family /// locus:tbc-8	regulation of Rab GTPase activity	Rab GTPase activator activity	intracellular	2.02
190496_s_at	pod-2	Polarity and Osmotic sensitivity Defect	fatty acid biosynthetic process /// metabolic process /// embryonic development ending in birth or egg hatching /// molting cycle, collagen and cuticulin-based cuticle /// locomotion	catalytic activity /// acetyl-CoA carboxylase activity /// ATP binding /// biotin binding /// ligase activity	---	2.39
190506_s_at	rnp-6	RNP (RRM RNA binding domain) containing	reproduction /// morphogenesis of an epithelium /// nematode larval development /// embryonic development ending in birth or egg hatching /// oviposition /// positive regulation of growth rate /// locomotion /// hermaphrodite genitalia development	nucleotide binding /// nucleic acid binding	---	1.81
190527_at	H36L18.1	matrix metalloprotease	proteolysis	catalytic activity /// metalloendopeptidase activity /// metallopeptidase activity /// metal ion binding	proteinaceous extracellular matrix	2.93
190533_s_at	ars-1	Alanyl tRNA Synthetase	reproduction /// translation /// alanyl-tRNA aminoacylation /// positive regulation of growth rate /// tRNA aminoacylation	nucleotide binding /// nucleic acid binding /// aminoacyl-tRNA ligase activity /// alanine-tRNA ligase activity /// ATP binding /// ligase activity, forming aminoacyl-tRNA and related compounds	cytoplasm	3.34
190544_at	R11G1.1	LDL receptor related protein	---	---	integral to membrane	-2.27
190545_at	mpk-2	MAP Kinase	protein amino acid phosphorylation	nucleotide binding /// protein kinase activity /// protein serine/threonine kinase activity /// MAP kinase activity /// protein tyrosine kinase activity /// ATP binding /// kinase activity /// transferase activity	---	3.04
190551_at	W01A8.6	carboxypeptidase b like	proteolysis	metallocarboxypeptidase activity /// zinc ion binding	---	1.85
190578_at	set-8	SET (trithorax/polycomb) domain containing /// locus:set-8	---	protein binding /// zinc ion binding	nucleus	-2.55
190594_at	nekl-2	NEK (NEver in mitosis Kinase) Like /// locus:nekl-2	nematode larval development /// protein amino acid phosphorylation /// body morphogenesis /// collagen and cuticulin-based cuticle development /// growth /// positive regulation of growth rate /// locomotion	protein kinase activity /// protein serine/threonine kinase activity /// protein tyrosine kinase activity /// protein binding /// ATP binding /// kinase activity	---	-2.69
190598_at	tsp-10	TetraSPanin family	---	---	integral to membrane	-2.53
190607_at	C09D4.3	SER/THR protein kinase	protein amino acid phosphorylation	protein kinase activity /// protein serine/threonine kinase activity /// ATP binding	---	1.87
190616_at	R12C12.1	hypothetical protein	glycine metabolic process	catalytic activity /// glycine dehydrogenase (decarboxylating) activity /// pyridoxal phosphate binding	---	2.46
190619_at	C15C8.3	cathepsin-like protease	proteolysis	aspartic-type endopeptidase activity	---	8.32
190620_s_at	alh-5	ALdehyde deHydrogenase /// locus:alh-5	cellular aldehyde metabolic process /// metabolic process	aldehyde dehydrogenase [NAD(P)+] activity /// oxidoreductase activity	---	2.81
190646_s_at	F18E3.7	hypothetical protein	metabolic process /// embryonic development ending in birth or egg hatching /// oxidation reduction /// oxidation reduction	catalytic activity /// D-amino-acid oxidase activity /// binding /// D-aspartate oxidase activity /// D-aspartate oxidase activity /// oxidoreductase activity /// D-glutamate oxidase activity	---	2.06
190670_at	zim-3	locus:zim-3 /// Zinc finger In Meiosis	metabolic process /// embryonic development ending in birth or egg hatching /// body morphogenesis /// meiotic chromosome segregation	zinc ion binding /// oxidoreductase activity	intracellular	2.35
190674_at	T09A12.2	hypothetical protein	response to oxidative stress	glutathione peroxidase activity	---	-2.55
190682_at	ugt-39	UDP-GlucuronosylTransferase	metabolic process	transferase activity /// transferase activity, transferring glycosyl groups /// transferase activity, transferring hexosyl groups	integral to membrane	-2.57
190699_at	C36H8.1	major sperm protein like	positive regulation of locomotion	structural molecule activity /// protein binding	integral to membrane	-1.99
190708_at	ddr-1	Discoidin Domain Receptor /// locus:ddr-1	protein amino acid phosphorylation /// cell adhesion	protein kinase activity /// protein serine/threonine kinase activity /// protein tyrosine kinase activity /// ATP binding	integral to membrane	-1.95
190712_at	alh-2	ALdehyde deHydrogenase /// locus:alh-2	metabolic process	oxidoreductase activity	---	2
190738_at	ZK1290.5	Aldo/keto reductase /// hypothetical protein	oxidation reduction	oxidoreductase activity	---	-2.77
190744_at	ugt-63	UDP-GlucuronosylTransferase /// locus:ugt-63	metabolic process	transferase activity /// transferase activity, transferring glycosyl groups /// transferase activity, transferring hexosyl groups	integral to membrane	-1.81
190756_at	aat-6	Amino Acid Transporter	transport /// amino acid transport	amino acid transmembrane transporter activity	membrane /// integral to membrane	1.81
190772_s_at	C14B9.8	Phosphorylase kinase	carbohydrate metabolic process /// glycogen metabolic process	catalytic activity /// calmodulin binding	---	2.08
190778_at	cln-3.1	human CLN (neuronal ceroid lipofuscinosis) related /// locus:cln-3.1	determination of adult life span /// determination of adult life span /// regulation of oviposition	---	membrane /// integral to membrane	1.89
190786_s_at	Y16B4A.2	serine carboxypeptidase /// hypothetical protein	proteolysis	serine-type carboxypeptidase activity	---	2.83
190796_s_at	F59B8.2	idh-1	isocitrate metabolic process /// metabolic process	isocitrate dehydrogenase (NADP+) activity /// oxidoreductase activity, acting on the CH-OH group of donors, NAD or NADP as acceptor	---	2.34
190797_at	unc-16	UNCoordinated	vesicle-mediated transport /// oviposition /// defecation /// locomotion /// positive regulation of locomotion /// regulation of JNK cascade /// synaptic vesicle transport	MAP-kinase scaffold activity /// protein binding /// kinesin binding /// protein kinase binding	cytoplasm /// cytoplasm	1.9
190816_at	tag-38	Temporarily Assigned Gene name /// locus:tag-38	carboxylic acid metabolic process	catalytic activity /// carboxy-lyase activity /// pyridoxal phosphate binding	---	4.1
190821_at	R07B1.3	membrane glycoprotein	cell adhesion	---	membrane /// integral to membrane	5.54
190822_s_at	R07B1.3	membrane glycoprotein	cell adhesion	---	membrane /// integral to membrane	12.86
190823_at	Y51B11A.1	hypothetical protein	---	---	---	-4.68
190829_s_at	C01G10.7	citrate lyase beta chain	cellular aromatic compound metabolic process	catalytic activity /// citrate (pro-3S)-lyase activity /// carbon-carbon lyase activity	citrate lyase complex	1.86
190837_at	aqp-4	AQuaPorin or aquaglyceroporin related /// locus:aqp-4	transcription /// regulation of transcription, DNA-dependent /// transport /// signal transduction /// multicellular organismal development /// regulation of transcription	DNA binding /// transcription factor activity /// signal transducer activity /// transporter activity /// protein binding	nucleus /// cytoplasm /// membrane /// integral to membrane	3.6
190857_at	T02G5.7	acetoacetyl CoA thiolase	metabolic process /// body morphogenesis /// locomotion	catalytic activity	---	2.25
190858_s_at	hmit-1.3	H(+)MyoInositol coTransporter /// locus:hmit-1.3	transport /// transmembrane transport	transporter activity /// substrate-specific transmembrane transporter activity	membrane /// integral to membrane	1.83
190879_at	ugt-1	UDP-GlucuronosylTransferase /// locus:ugt-1	metabolic process /// determination of adult life span /// positive regulation of growth rate	transferase activity /// transferase activity, transferring glycosyl groups /// transferase activity, transferring hexosyl groups	integral to membrane	-3.59
190886_at	ugt-62	UDP-GlucuronosylTransferase /// locus:ugt-62	metabolic process /// positive regulation of growth rate	transferase activity /// transferase activity, transferring glycosyl groups /// transferase activity, transferring hexosyl groups	integral to membrane	5.07
190895_at	ugt-2	UDP-GlucuronosylTransferase /// locus:ugt-2	metabolic process	transferase activity /// transferase activity, transferring glycosyl groups /// transferase activity, transferring hexosyl groups	integral to membrane	2.36
190904_s_at	C06G1.5	protein phosphatase PP2A	---	calcium ion binding	---	1.83
190917_at	bre-1	BT (Bacillus thuringiensis) toxin REsistant	metabolic process /// response to insecticide /// GDP-mannose metabolic process /// cellular metabolic process	catalytic activity /// binding /// GDP-mannose 4,6-dehydratase activity /// GDP-mannose 4,6-dehydratase activity /// oxidoreductase activity /// lyase activity /// coenzyme binding	intracellular	2.02
190933_at	VZC374L.1	serine/threonine kinase	protein amino acid phosphorylation	protein kinase activity /// protein serine/threonine kinase activity /// protein tyrosine kinase activity /// ATP binding	---	2.12
190947_s_at	cnt-2	CeNTaurin	small GTPase mediated signal transduction /// embryonic development ending in birth or egg hatching /// protein transport /// regulation of ARF GTPase activity	nucleotide binding /// protein binding /// GTP binding /// ARF GTPase activator activity /// zinc ion binding	intracellular	2.08
190955_s_at	ttr-18	TransThyretin-Related family domain /// locus:ttr-18	---	---	---	1.82
190958_s_at	F44E5.4	hHeat shock hsp70 proteins	positive regulation of growth rate	ATP binding	---	-1.89
190958_s_at	F44E5.5	Heat shock hsp70 proteins	positive regulation of growth rate	ATP binding	---	-1.89
190978_at	sodh-1	SOrbitol DeHydrogenase family /// locus:sodh-1	metabolic process /// determination of adult life span /// oxidation reduction	catalytic activity /// alcohol dehydrogenase activity /// binding /// protein binding /// zinc ion binding /// oxidoreductase activity /// metal ion binding	---	3.66
191011_at	srh-195	Serpentine Receptor, class H /// locus:srh-195	---	receptor activity	integral to membrane	-2.14
191017_at	Y40D12A.2	serine carboxypeptidase /// hypothetical protein	nematode larval development /// proteolysis /// growth	serine-type carboxypeptidase activity	integral to membrane	3.54
191030_at	srh-88	Serpentine Receptor, class H /// locus:srh-88	---	receptor activity	integral to membrane	3.08
191042_at	nhr-181	Nuclear Hormone Receptor family /// locus:nhr-181	transcription /// regulation of transcription, DNA-dependent	DNA binding /// transcription factor activity /// steroid hormone receptor activity /// ligand-dependent nuclear receptor activity /// zinc ion binding /// sequence-specific DNA binding /// metal ion binding	nucleus	2.16
191057_s_at	ugt-6	UDP-GlucuronosylTransferase /// locus:ugt-6	metabolic process	transferase activity /// transferase activity, transferring glycosyl groups /// transferase activity, transferring hexosyl groups	integral to membrane	-2.06
191064_at	dnj-27	DNaJ domain (prokaryotic heat shock protein)	protein folding /// cell redox homeostasis	heat shock protein binding /// unfolded protein binding	---	1.88
191068_at	ttr-14	TransThyretin-Related family domain /// locus:ttr-14	reproduction /// nematode larval development	---	---	2.03
191083_at	srm-2	Serpentine Receptor, class M /// locus:srm-2	---	receptor activity	integral to membrane	-2.12
191103_at	sri-42	Serpentine Receptor, class I /// locus:sri-42	---	receptor activity	integral to membrane	-2
191104_at	cup-4	Coelomocyte UPtake defective /// locus:cup-4	transport /// ion transport /// endocytosis /// endocytosis /// synaptic transmission	receptor activity /// ion channel activity /// extracellular ligand-gated ion channel activity /// acetylcholine receptor activity	membrane /// integral to membrane /// integral to membrane /// cytoplasmic vesicle membrane /// cytoplasmic vesicle /// postsynaptic membrane	-1.86
191122_at	abu-3	Activated in Blocked Unfolded protein response /// locus:abu-3	---	---	---	-1.85
191155_at	sri-21	Serpentine Receptor, class I /// locus:sri-21	---	receptor activity	integral to membrane	-2.77
191204_s_at	C06A8.3	17k antigen (O. volvulus)	---	---	---	1.86
191206_s_at	T02E9.3	G-protein coupled receptor	reproduction /// G-protein coupled receptor protein signaling pathway	---	integral to membrane	1.89
191214_at	srh-79	Serpentine Receptor, class H /// locus:srh-79	---	receptor activity	integral to membrane	-1.92
191235_at	gcy-21	Guanylyl CYclase /// locus:gcy-21	protein amino acid phosphorylation /// intracellular signaling cascade /// cyclic nucleotide biosynthetic process	guanylate cyclase activity /// protein kinase activity /// protein serine/threonine kinase activity /// protein tyrosine kinase activity /// ATP binding /// phosphorus-oxygen lyase activity	membrane /// integral to membrane	2.1
191237_at	tag-231	Temporarily Assigned Gene name /// locus:tag-231	---	inositol or phosphatidylinositol phosphatase activity	---	1.89
191247_at	str-256	Seven TM Receptor /// locus:str-256	---	receptor activity	integral to membrane	-2.45
191251_at	ugt-21	UDP-GlucuronosylTransferase /// locus:ugt-21	metabolic process	transferase activity /// transferase activity, transferring glycosyl groups /// transferase activity, transferring hexosyl groups	integral to membrane	3.32
191261_at	ckr-1	CholecystoKinin Receptor homolog /// locus:ckr-1	G-protein coupled receptor protein signaling pathway /// embryonic development ending in birth or egg hatching	neuropeptide Y receptor activity	integral to membrane	-1.94
191281_s_at	mec-12	MEChanosensory abnormality /// locus:mec-12	microtubule-based process /// microtubule-based process /// microtubule-based movement /// mechanosensory behavior /// response to mechanical stimulus /// protein polymerization	nucleotide binding /// GTPase activity /// structural molecule activity /// GTP binding	microtubule /// protein complex	2.75
191292_s_at	cyc-1	CYtochrome C /// locus:cyc-1	reproduction /// nematode larval development /// embryonic development ending in birth or egg hatching /// oviposition /// growth /// positive regulation of growth rate /// positive regulation of embryonic development /// hermaphrodite genitalia development	iron ion binding /// electron carrier activity /// heme binding	integral to membrane	2.23
191308_at	str-139	Seven TM Receptor /// locus:str-139	---	receptor activity	integral to membrane	-1.89
191313_at	K10C3.5	hypothetical protein	---	GTPase activity /// GTP binding	---	1.82
191326_at	gcy-3	Guanylyl CYclase /// locus:gcy-3	protein amino acid phosphorylation /// intracellular signaling cascade /// cyclic nucleotide biosynthetic process	guanylate cyclase activity /// protein kinase activity /// protein serine/threonine kinase activity /// protein tyrosine kinase activity /// ATP binding /// phosphorus-oxygen lyase activity	membrane /// integral to membrane	-2.61
191331_at	gst-28	Glutathione S-Transferase /// locus:gst-28	---	---	---	2.61
191333_at	ttr-26	TransThyretin-Related family domain /// locus:ttr-26	---	---	---	-1.9
191336_at	K06C4.8	G-protein coupled receptor	G-protein coupled receptor protein signaling pathway	---	integral to membrane	-2.19
191353_at	srd-33	Serpentine Receptor, class D (delta) /// locus:srd-33	---	---	membrane /// integral to membrane	-1.87
191364_at	R05H10.5	Glutathione peroxidases	response to oxidative stress /// oxidation reduction	peroxidase activity /// glutathione peroxidase activity /// oxidoreductase activity	cytoplasm	-1.92
191366_s_at	eva-1	Enhancer of unc-40 Ventral Axon guidance defects	---	sugar binding	integral to membrane	2.59
191379_at	B0302.5	tyrosine-protein kinase	---	---	---	-1.84
191381_at	srh-275	Serpentine Receptor, class H /// locus:srh-275	---	receptor activity	integral to membrane	-1.84
191392_at	F53A9.5	G-protein coupled receptor	G-protein coupled receptor protein signaling pathway	---	integral to membrane	-1.88
191401_at	sri-40	Serpentine Receptor, class I	---	receptor activity	integral to membrane	3.28
191404_at	sptl-2	Serine Palmitoyl Transferase famiLy	metabolic process /// biosynthetic process	catalytic activity /// transferase activity /// transferase activity, transferring nitrogenous groups /// pyridoxal phosphate binding	---	4.78
191405_at	C50F7.1	hypothetical protein	G-protein coupled receptor protein signaling pathway	---	integral to membrane	3.68
191418_at	ugt-16	UDP-GlucuronosylTransferase /// locus:ugt-16	metabolic process	transferase activity /// transferase activity, transferring glycosyl groups /// transferase activity, transferring hexosyl groups	integral to membrane	3.13
191436_at	F38E11.5	beta'-coat protein like	reproduction /// nematode larval development /// transport /// intracellular protein transport /// embryonic development ending in birth or egg hatching /// protein transport /// vesicle-mediated transport /// oocyte development	structural molecule activity /// protein binding	Golgi membrane /// cytoplasm /// Golgi apparatus /// membrane /// membrane coat /// cytoplasmic vesicle	-1.84
191438_at	str-148	Seven TM Receptor /// locus:str-148	---	receptor activity	integral to membrane	-2.04
191440_at	ugt-47	UDP-GlucuronosylTransferase /// locus:ugt-47	metabolic process	transferase activity /// transferase activity, transferring glycosyl groups /// transferase activity, transferring hexosyl groups	integral to membrane	1.86
191449_s_at	cul-5	CULlin /// locus:cul-5	ubiquitin-dependent protein catabolic process /// defecation /// locomotion	ubiquitin protein ligase binding	cullin-RING ubiquitin ligase complex	2.13
191455_s_at	pgp-2	P-GlycoProtein related /// locus:pgp-2	transport /// organelle organization /// sequestering of lipid	nucleotide binding /// ATP binding /// ATPase activity /// nucleoside-triphosphatase activity /// ATPase activity, coupled to transmembrane movement of substances	integral to membrane	3.21
191459_s_at	F39B2.3	Zinc-binding dehydrogenases	metabolic process /// oxidation reduction	catalytic activity /// binding /// zinc ion binding /// oxidoreductase activity	---	2.06
191469_at	tag-10	Temporarily Assigned Gene name	---	---	---	2.28
191470_s_at	tag-10	Temporarily Assigned Gene name	---	---	---	4.78
191482_at	ugt-43	UDP-GlucuronosylTransferase /// locus:ugt-43	metabolic process	transferase activity /// transferase activity, transferring glycosyl groups /// transferase activity, transferring hexosyl groups	integral to membrane	-1.83
191489_s_at	unc-13	UNCoordinated	intracellular signaling cascade /// positive regulation of growth rate /// locomotion /// regulation of pharyngeal pumping /// regulation of pharyngeal pumping /// regulation of oviposition /// regulation of oviposition	zinc ion binding /// diacylglycerol binding /// metal ion binding	---	2.63
191494_s_at	ZK1320.9	acetate utilisation protein /// hypothetical protein	acetyl-CoA metabolic process	catalytic activity /// sugar binding	---	2.26
191530_at	ZK849.5	Putative membrane protein /// hypothetical protein	---	---	integral to membrane	-1.97
191536_at	str-85	Seven TM Receptor /// locus:str-85	---	receptor activity	integral to membrane	-1.95
191540_at	W03F8.3	protein releasing factor	translation /// translational termination	translation release factor activity /// translation release factor activity, codon specific	cytoplasm /// mitochondrion	1.9
191548_s_at	uba-1	UBA (human ubiquitin) related	reproduction /// nematode larval development /// protein modification process /// spermatogenesis /// metabolic process /// embryonic development ending in birth or egg hatching /// protein ubiquitination /// growth /// tail tip morphogenesis /// oogenesis /// neuromuscular process	catalytic activity /// binding /// ATP binding /// small protein activating enzyme activity	---	1.84
191556_at	str-40	Seven TM Receptor /// locus:str-40	---	receptor activity	integral to membrane	-2.48
191559_s_at	F11A5.9	sodium/phosphate transporter	transport	transporter activity	integral to membrane	3.73
191577_at	str-86	Seven TM Receptor /// locus:str-86	---	receptor activity	integral to membrane	-1.8
191581_at	B0564.3	Putative membrane protein	---	---	integral to membrane	17.05
191607_s_at	asp-4	ASpartyl Protease /// locus:asp-4	proteolysis /// proteolysis /// cell death /// induction of non-apoptotic programmed cell death	aspartic-type endopeptidase activity /// peptidase activity /// hydrolase activity	lysosome	1.87
191621_s_at	sma-1	SMAll	nematode larval development /// body morphogenesis /// embryonic body morphogenesis /// oviposition /// collagen and cuticulin-based cuticle development /// positive regulation of growth rate /// locomotion /// regulation of locomotion /// regulation of locomotion /// positive regulation of multicellular organism growth /// positive regulation of cell size /// positive regulation of organ growth	actin binding /// protein binding	---	2.13
191625_s_at	ttr-3	TransThyretin-Related family domain /// TransThyretin-Related family domain /// locus:ttr-4 /// locus:ttr-3	---	---	extracellular region	-1.94
191625_s_at	ttr-4	TransThyretin-Related family domain /// TransThyretin-Related family domain /// locus:ttr-4 /// locus:ttr-3	---	---	extracellular region	-1.94
191633_s_at	acy-1	Adenylyl CYclase /// locus:acy-1	nematode larval development /// G-protein signaling, coupled to cAMP nucleotide second messenger /// intracellular signaling cascade /// cell death /// cyclic nucleotide biosynthetic process /// sleep /// positive regulation of locomotion /// response to chemical stimulus	phosphorus-oxygen lyase activity	membrane /// integral to membrane	2
191641_s_at	C36A4.9	hypothetical protein	metabolic process	catalytic activity /// acetate-CoA ligase activity /// AMP binding	---	2.68
191645_at	C27B7.7	fibronectin type-III repeats	---	---	extracellular region	-1.9
191689_s_at	ugt-17	UDP-GlucuronosylTransferase	metabolic process	transferase activity /// transferase activity, transferring glycosyl groups /// transferase activity, transferring hexosyl groups	integral to membrane	6.42
191693_at	gst-42	Glutathione S-Transferase /// locus:gst-42	L-phenylalanine catabolic process /// tyrosine catabolic process /// aromatic amino acid family metabolic process	catalytic activity /// protein binding /// maleylacetoacetate isomerase activity /// isomerase activity /// identical protein binding	cytoplasm	-3.41
191712_s_at	gei-7	GEX Interacting protein	glyoxylate cycle /// tricarboxylic acid cycle /// metabolic process /// determination of adult life span /// determination of adult life span /// carboxylic acid metabolic process	catalytic activity /// isocitrate lyase activity /// malate synthase activity /// transferase activity /// lyase activity	---	3.46
191718_s_at	ifp-1	Intermediate Filament Protein, class E /// locus:ifp-1	embryonic development ending in birth or egg hatching /// positive regulation of multicellular organism growth	structural molecule activity /// protein binding	cytoplasm /// intermediate filament	2.7
191720_at	mek-1	MAP kinase kinase or Erk Kinase	reproduction /// MAPKKK cascade /// activation of MAPK activity /// protein amino acid phosphorylation /// male meiosis /// female meiosis /// response to temperature stimulus /// oocyte differentiation /// regulation of growth rate /// response to starvation /// response to starvation /// response to cadmium ion /// response to copper ion	protein kinase activity /// protein serine/threonine kinase activity /// MAP kinase kinase activity /// protein tyrosine kinase activity /// serine-type endopeptidase inhibitor activity /// protein binding /// ATP binding /// kinase activity	cytoplasm	2
191730_s_at	unc-40	UNCoordinated /// locus:unc-40	determination of adult life span /// oviposition /// positive regulation of growth rate /// locomotion	---	integral to membrane	2.09
191755_at	srd-55	Serpentine Receptor, class D (delta) /// locus:srd-55	---	---	membrane /// integral to membrane	-1.95
191759_at	fmo-2	Flavin-containing MonoOxygenase family /// locus:fmo-2	metabolic process /// oxidation reduction	catalytic activity /// monooxygenase activity /// flavin-containing monooxygenase activity /// binding /// oxidoreductase activity /// FAD binding /// NADP binding	microsome /// integral to membrane /// intrinsic to endoplasmic reticulum membrane	2.59
191777_at	C27H5.3	Probable RNA binding protein	embryonic development ending in birth or egg hatching	nucleotide binding /// nucleic acid binding /// zinc ion binding	intracellular	1.83
191782_s_at	ncx-4	Na/Ca eXchangers	---	---	integral to membrane	2.58
191786_at	lec-7	gaLECtin /// locus:lec-7	---	sugar binding	---	2.08
191787_s_at	lec-7	gaLECtin /// locus:lec-7	---	sugar binding	---	2.64
191802_at	pssy-1	PhosphatidylSerine SYnthase /// locus:pssy-1	phosphatidylserine biosynthetic process /// positive regulation of multicellular organism growth	---	integral to membrane	1.93
191807_at	C43C3.2	G protein coupled receptor	signal transduction /// G-protein coupled receptor protein signaling pathway	signal transducer activity /// receptor activity /// G-protein coupled receptor activity	plasma membrane /// membrane /// integral to membrane	-3.03
191820_s_at	K07C5.4	yeast protein L8167.9-like	reproduction /// nematode larval development /// embryonic development ending in birth or egg hatching /// growth /// positive regulation of growth rate /// positive regulation of multicellular organism growth /// hermaphrodite genitalia development	---	---	2.56
191828_at	R08E3.1	hypothetical protein	---	---	---	2.04
191831_s_at	pyp-1	inorganic PYroPhosphatase	reproduction /// nematode larval development /// phosphate metabolic process /// embryonic development ending in birth or egg hatching /// growth /// positive regulation of growth rate	magnesium ion binding /// inorganic diphosphatase activity /// hydrolase activity /// metal ion binding	cytoplasm /// integral to membrane	2.18
191844_at	ceh-7	Homeobox /// locus:ceh-7	regulation of transcription, DNA-dependent /// multicellular organismal development /// regulation of transcription	DNA binding /// transcription factor activity /// transcription regulator activity /// sequence-specific DNA binding	nucleus	-2.86
191847_s_at	acdh-12	Acyl CoA DeHydrogenase	metabolic process /// embryonic development ending in birth or egg hatching /// positive regulation of growth rate	acyl-CoA dehydrogenase activity /// electron carrier activity /// oxidoreductase activity /// oxidoreductase activity, acting on the CH-CH group of donors /// FAD binding	---	2.2
191849_at	fmo-1	Flavin-containing MonoOxygenase family /// locus:fmo-1	metabolic process /// oxidation reduction	catalytic activity /// monooxygenase activity /// flavin-containing monooxygenase activity /// binding /// oxidoreductase activity /// FAD binding /// NADP binding	microsome /// integral to membrane /// intrinsic to endoplasmic reticulum membrane	2.35
191854_at	T14G10.5	hypothetical protein	reproduction /// nematode larval development /// transport /// intracellular protein transport /// protein transport /// vesicle-mediated transport /// positive regulation of growth rate /// locomotion	structural molecule activity /// binding /// protein binding	Golgi membrane /// cytoplasm /// Golgi apparatus /// Golgi-associated vesicle /// membrane /// membrane coat /// COPI vesicle coat /// cytoplasmic vesicle	1.81
191857_s_at	scl-22	SCP-Like extracellular protein /// locus:scl-22	---	---	extracellular region	2.6
191871_s_at	cdr-4	CaDmium Responsive /// locus:cdr-4	positive regulation of growth rate	---	integral to membrane	2.21
191876_s_at	F20B6.1	protein tyrosine phosphatase	nematode larval development /// protein amino acid dephosphorylation /// embryonic development ending in birth or egg hatching /// dephosphorylation /// growth	protein tyrosine phosphatase activity /// phosphatase activity	---	-2.05
191887_s_at	cpr-5	Cysteine PRotease related /// locus:cpr-5	proteolysis	cysteine-type endopeptidase activity /// protein binding /// peptidase activity /// cysteine-type peptidase activity /// hydrolase activity	---	2.05
191896_at	H06I04.5	protein-tyrosine phoshatase	ciliary or flagellar motility /// protein amino acid dephosphorylation /// chemotaxis /// dephosphorylation	protein tyrosine phosphatase activity /// phosphatase activity	flagellin-based flagellum basal body /// integral to membrane	-2.01
191900_s_at	M04G7.2	protein-tyrosine phosphatase	protein amino acid dephosphorylation /// dephosphorylation	protein tyrosine phosphatase activity /// phosphatase activity	---	2.66
191917_at	T28F3.4	hypothetical protein	transport	transporter activity	integral to membrane	2.97
191935_s_at	unc-10	UNCoordinated	intracellular protein transport /// exocytosis /// mating behavior /// locomotory behavior /// protein localization /// defecation /// positive regulation of synaptic transmission, cholinergic /// locomotion /// positive regulation of multicellular organism growth /// regulation of pharyngeal pumping	protein binding /// zinc ion binding /// Rab GTPase binding /// Rab GTPase binding /// metal ion binding	cell junction /// synapse	2.83
191947_at	T22D1.12	seven transmembrane receptor	G-protein coupled receptor protein signaling pathway	neuropeptide Y receptor activity /// protein binding	integral to membrane	1.85
191955_at	F43G6.3	Leucine Rich Repeat (2 copies)	---	---	---	2.03
191981_at	asic-2	Acid-sensing/Amiloride-Sensitive Ion Channel family /// locus:asic-2	transport /// ion transport /// sodium ion transport	ion channel activity /// sodium channel activity /// sodium ion binding	membrane /// integral to membrane	-2.49
191987_at	K09A9.6	hypothetical protein	peptidyl-amino acid modification	peptide-aspartate beta-dioxygenase activity /// binding	integral to membrane /// integral to endoplasmic reticulum membrane	1.98
191988_s_at	K09A9.6	hypothetical protein	peptidyl-amino acid modification	peptide-aspartate beta-dioxygenase activity /// binding	integral to membrane /// integral to endoplasmic reticulum membrane	2.06
192003_s_at	K11G12.5	mitochondrial 2-oxoglutartae	transport	binding	mitochondrial inner membrane /// membrane /// integral to membrane	1.96
192017_s_at	ife-3	Initiation Factor 4E (eIF4E) family	translation /// translational initiation /// regulation of translation /// embryonic development ending in birth or egg hatching	RNA binding /// translation initiation factor activity /// protein binding	cytoplasm	1.83
192035_s_at	hsr-9	hsr-9	reproduction /// morphogenesis of an epithelium /// nematode larval development /// growth /// hermaphrodite genitalia development	---	intracellular	2.01
192048_at	dpf-2	Dipeptidyl Peptidase Four (IV) family /// locus:dpf-2	proteolysis	aminopeptidase activity /// peptidase activity /// serine-type peptidase activity /// hydrolase activity	plasma membrane /// membrane /// integral to membrane	2.02
192054_at	F29G6.1	kazal-type proteinase inhibitor	reproduction /// embryonic development ending in birth or egg hatching	---	---	-1.83
192059_at	hmit-1.1	H(+)MyoInositol coTransporter /// locus:hmit-1.1	transport /// transmembrane transport	transporter activity /// substrate-specific transmembrane transporter activity	membrane /// integral to membrane	-3.42
192062_at	pde-2	PhosphoDiEsterase	signal transduction	catalytic activity /// 3',5'-cyclic-nucleotide phosphodiesterase activity /// hydrolase activity	---	2.14
192076_at	aqp-8	AQuaPorin or aquaglyceroporin related	transport	transporter activity	membrane /// integral to membrane	-2.26
192078_at	F32B6.2	carbomoyl-phosphate carboxylase	metabolic process	catalytic activity /// ATP binding /// biotin binding /// ligase activity	---	1.88
192106_at	C34C6.3	EGF receptor/notch-like protein	---	catalytic activity /// metal ion binding	---	1.81
192107_s_at	pyc-1	PYruvate Carboxylase /// locus:pyc-1	gluconeogenesis /// metabolic process	nucleotide binding /// catalytic activity /// pyruvate carboxylase activity /// ATP binding /// zinc ion binding /// biotin binding /// ligase activity /// metal ion binding	cytoplasm	2.44
192124_at	T23F11.4	Zinc finger protein (C2H2 type)	---	protein binding /// zinc ion binding	intracellular	2.38
192134_at	T05A10.4	SCP-like extracellular Proteins	---	---	extracellular region	2.21
192136_at	nhr-55	Nuclear Hormone Receptor family /// locus:nhr-55	transcription /// regulation of transcription, DNA-dependent	DNA binding /// transcription factor activity /// steroid hormone receptor activity /// receptor activity /// zinc ion binding /// sequence-specific DNA binding /// metal ion binding	nucleus	-2.02
192144_s_at	asm-2	Acid SphingoMyelinase /// locus:asm-2	lipid metabolic process /// sphingomyelin catabolic process /// sphingomyelin catabolic process /// metabolic process /// ceramide biosynthetic process	sphingomyelin phosphodiesterase activity /// sphingomyelin phosphodiesterase activity /// hydrolase activity /// hydrolase activity, acting on glycosyl bonds	extracellular region /// extracellular region	-4.71
192160_s_at	M03B6.2	monocarboxylate transporter like	transport	transporter activity	integral to membrane	1.88
192162_at	F58G11.2	ATP-dependent RNA helicase like	---	nucleic acid binding /// helicase activity /// ATP binding /// ATP-dependent helicase activity	---	2.23
192183_s_at	rsp-6	SR Protein (splicing factor)	gastrulation with mouth forming first /// morphogenesis of an epithelium /// nematode larval development /// mRNA processing /// multicellular organismal development /// multicellular organismal development /// sex determination /// RNA splicing /// RNA splicing /// gonad development /// gonad development /// embryonic development /// embryonic development ending in birth or egg hatching /// body…	nucleotide binding /// nucleic acid binding /// RNA binding /// RNA binding /// protein binding	nucleus /// nucleus	1.82
192184_at	F10G8.2	Eukaryotic protein kinase domain	---	---	---	-2.1
192190_at	hacd-1	Hydroxy-Acyl-CoA Dehydrogenase /// locus:hacd-1	fatty acid metabolic process /// metabolic process	catalytic activity /// binding /// protein binding /// oxidoreductase activity /// coenzyme binding	integral to membrane	2.87
192191_s_at	C06E7.1	hypothetical protein /// hypothetical protein	reproduction /// morphogenesis of an epithelium /// nematode larval development /// one-carbon compound metabolic process /// growth /// positive regulation of growth rate /// locomotion /// positive regulation of locomotion /// hermaphrodite genitalia development	nucleotide binding /// magnesium ion binding /// methionine adenosyltransferase activity /// ATP binding /// transferase activity /// potassium ion binding /// metal ion binding /// cobalt ion binding	---	2.87
192191_s_at	Y105C5B.12	hypothetical protein /// hypothetical protein	reproduction /// morphogenesis of an epithelium /// nematode larval development /// one-carbon compound metabolic process /// growth /// positive regulation of growth rate /// locomotion /// positive regulation of locomotion /// hermaphrodite genitalia development	nucleotide binding /// magnesium ion binding /// methionine adenosyltransferase activity /// ATP binding /// transferase activity /// potassium ion binding /// metal ion binding /// cobalt ion binding	---	2.87
192194_s_at	asm-3	Acid SphingoMyelinase	sphingomyelin catabolic process /// sphingomyelin catabolic process /// metabolic process /// ceramide biosynthetic process	sphingomyelin phosphodiesterase activity /// sphingomyelin phosphodiesterase activity /// hydrolase activity /// hydrolase activity, acting on glycosyl bonds	extracellular region /// extracellular region	-7.85
192195_at	acs-2	fatty Acid CoA Synthetase family /// locus:acs-2	metabolic process	catalytic activity	---	26.6
192221_at	kqt-1	potassium channel, KvQLT family	transport /// ion transport /// potassium ion transport	ion channel activity /// voltage-gated potassium channel activity	voltage-gated potassium channel complex /// membrane /// integral to membrane	1.88
192223_at	alr-1	AristaLess (Drosophila homeodomain) Related /// locus:alr-1	regulation of transcription, DNA-dependent /// regulation of transcription	DNA binding /// transcription factor activity /// transcription regulator activity /// sequence-specific DNA binding	nucleus	-2.29
192225_at	T14D7.1	serine-pyruvate aminotransferase	metabolic process	catalytic activity /// pyridoxal phosphate binding	---	2.61
192226_s_at	nsf-1	NSF (N-ethylmaleimide sensitive secretion factor) homolog	reproduction /// nematode larval development /// transport /// embryonic development ending in birth or egg hatching /// protein transport /// growth /// locomotion	nucleotide binding /// magnesium ion binding /// binding /// protein binding /// ATP binding /// hydrolase activity /// nucleoside-triphosphatase activity /// metal ion binding	cytoplasm	1.84
192228_at	M199.2	MSP (Major sperm protein) domain.	---	structural molecule activity	---	1.82
192237_s_at	ace-4	abnormal ACEtylcholinesterase /// locus:ace-4	---	acetylcholinesterase activity /// cholinesterase activity /// hydrolase activity	integral to membrane	-1.95
192240_s_at	inf-1	INitiation Factor /// Eukaryotic initiation factor 4A	reproduction /// nematode larval development /// translation /// determination of adult life span /// embryonic development ending in birth or egg hatching /// growth /// positive regulation of growth rate /// locomotion	nucleotide binding /// nucleic acid binding /// RNA binding /// translation initiation factor activity /// helicase activity /// ATP binding /// ATP-dependent helicase activity /// hydrolase activity	---	2.25
192243_at	cct-1	Chaperonin Containing TCP-1 /// locus:cct-1	reproduction /// nematode larval development /// protein folding /// embryonic development ending in birth or egg hatching /// growth /// positive regulation of growth rate /// hermaphrodite genitalia development /// cellular protein metabolic process	nucleotide binding /// protein binding /// ATP binding /// unfolded protein binding	cytoplasm	2.01
192268_at	C02F12.10	homeobox; tissue factor pathway inhibitor	regulation of transcription, DNA-dependent /// regulation of transcription	DNA binding /// transcription factor activity /// serine-type endopeptidase inhibitor activity /// transcription regulator activity /// sequence-specific DNA binding	nucleus	-2.2
192268_at	C02F12.5	homeobox; tissue factor pathway inhibitor	regulation of transcription, DNA-dependent /// regulation of transcription	DNA binding /// transcription factor activity /// serine-type endopeptidase inhibitor activity /// transcription regulator activity /// sequence-specific DNA binding	nucleus	-2.2
192277_at	gana-1	GAlactosidase/N-Acetylgalactosaminidase /// locus:gana-1	carbohydrate metabolic process /// metabolic process /// glycoside catabolic process	catalytic activity /// hydrolase activity, hydrolyzing O-glycosyl compounds /// cation binding	---	1.8
192281_at	acs-11	fatty Acid CoA Synthetase family /// locus:acs-11	metabolic process	catalytic activity	---	2.56
192282_at	nhr-58	Nuclear Hormone Receptor family	transcription /// regulation of transcription, DNA-dependent /// embryonic development ending in birth or egg hatching	DNA binding /// transcription factor activity /// steroid hormone receptor activity /// receptor activity /// zinc ion binding /// sequence-specific DNA binding /// metal ion binding	nucleus	2.45
192296_at	T08B1.6	acs-3	metabolic process /// embryonic development ending in birth or egg hatching	catalytic activity	---	-1.83
192302_at	hst-3.1	Heparan SulphoTransferase /// locus:hst-3.1	---	sulfotransferase activity /// transferase activity	integral to membrane	2.07
192306_s_at	K09B11.5	hypothetical protein	protein amino acid phosphorylation	nucleotide binding /// protein kinase activity /// protein serine/threonine kinase activity /// protein tyrosine kinase activity /// protein binding /// ATP binding /// kinase activity /// transferase activity	---	-2.48
192314_s_at	R03G8.6	zinc metallopeptidase (M1 family)	proteolysis	metallopeptidase activity /// zinc ion binding	---	4.56
192345_s_at	F32H5.1	cathepsin B like cysteine protease	proteolysis /// positive regulation of growth rate	cysteine-type peptidase activity	---	2.15
192356_s_at	spc-1	SPeCtrin /// locus:spc-1	nematode larval development /// body morphogenesis /// embryonic body morphogenesis /// growth /// locomotion /// regulation of locomotion /// positive regulation of multicellular organism growth	calcium ion binding	---	1.82
192363_at	acs-17	fatty Acid CoA Synthetase family /// locus:acs-17	metabolic process /// determination of adult life span	catalytic activity	integral to membrane	2.13
192372_at	sptf-2	Specificity Protein) Transcription Factor /// locus:sptf-2	---	nucleic acid binding /// zinc ion binding	intracellular	-2.35
192397_at	scl-7	SCP-Like extracellular protein /// locus:scl-7	---	---	extracellular region	-2.03
192398_s_at	scl-7	SCP-Like extracellular protein /// locus:scl-7	---	---	extracellular region	-12.6
192404_at	scl-5	SCP-Like extracellular protein /// locus:scl-5	---	---	extracellular region	-4.98
192407_at	gst-4	Glutathione S-Transferase /// locus:gst-4	---	glutathione transferase activity /// transferase activity	---	2.31
192408_at	trp-2	TRP (transient receptor potential) channel family	transport /// ion transport /// calcium ion transport	receptor activity /// ion channel activity /// calcium channel activity /// protein binding	membrane /// integral to membrane	2.91
192409_at	lat-1	LATrophilin receptor	signal transduction /// cell surface receptor linked signal transduction /// G-protein coupled receptor protein signaling pathway /// neuropeptide signaling pathway /// embryonic development /// defecation	signal transducer activity /// receptor activity /// transmembrane receptor activity /// G-protein coupled receptor activity /// sugar binding	plasma membrane /// membrane /// integral to membrane	2.01
192425_at	---	---	---	---	---	-2.12
192429_at	scl-8	SCP-Like extracellular protein /// locus:scl-8	---	---	extracellular region	-13.83
192435_at	seld-1	SELD (SelD homolog) involved in selenophosphate synthesis /// locus:seld-1	---	nucleotide binding /// catalytic activity /// selenide, water dikinase activity /// ATP binding /// selenium binding /// kinase activity /// transferase activity	---	1.88
192476_at	stdh-3	STeroid DeHydrogenase family /// locus:stdh-3	steroid biosynthetic process /// metabolic process /// lipid biosynthetic process /// oxidation reduction	catalytic activity /// alcohol dehydrogenase activity /// binding /// oxidoreductase activity	integral to membrane	-1.81
192484_at	inx-5	INneXin /// locus:inx-5	---	---	plasma membrane /// gap junction /// membrane /// integral to membrane /// cell junction	2.31
192488_at	nhr-127	Nuclear Hormone Receptor family /// locus:nhr-127	transcription /// regulation of transcription, DNA-dependent	DNA binding /// transcription factor activity /// steroid hormone receptor activity /// receptor activity /// ligand-dependent nuclear receptor activity /// zinc ion binding /// sequence-specific DNA binding /// metal ion binding	nucleus	2.45
192493_s_at	sams-1	S-Adenosyl Methionine Synthetase /// locus:sams-1	reproduction /// one-carbon compound metabolic process /// positive regulation of growth rate /// locomotion /// negative regulation of multicellular organism growth /// positive regulation of multicellular organism growth	nucleotide binding /// magnesium ion binding /// methionine adenosyltransferase activity /// ATP binding /// transferase activity /// potassium ion binding /// metal ion binding /// cobalt ion binding	---	2.84
192494_s_at	unc-5	UNCoordinated	signal transduction /// multicellular organismal development /// motor axon guidance /// mesodermal cell migration /// gonad morphogenesis /// locomotion /// positive regulation of locomotion /// positive regulation of axon extension	receptor activity /// protein binding	membrane /// integral to membrane	2.05
192498_at	nhr-174	Nuclear Hormone Receptor family /// locus:nhr-174	transcription /// regulation of transcription, DNA-dependent	DNA binding /// transcription factor activity /// steroid hormone receptor activity /// receptor activity /// zinc ion binding /// sequence-specific DNA binding /// metal ion binding	nucleus	3.17
192504_at	T22H6.2	hypothetical protein	proline biosynthetic process /// metabolic process /// amino acid biosynthetic process /// positive regulation of growth rate /// oxidation reduction	catalytic activity /// glutamate 5-kinase activity /// glutamate-5-semialdehyde dehydrogenase activity /// kinase activity /// oxidoreductase activity /// transferase activity	cytoplasm	2.53
192507_at	mec-8	MEChanosensory abnormality /// locus:mec-8	nematode larval development /// mechanosensory behavior /// response to mechanical stimulus /// embryonic development ending in birth or egg hatching /// embryonic development ending in birth or egg hatching /// dauer entry /// muscle morphogenesis /// muscle morphogenesis /// neuron development /// sensory perception of mechanical stimulus	nucleotide binding /// nucleic acid binding /// protein binding	---	2.31
192509_at	clec-60	C-type LECtin /// locus:clec-60	---	binding	---	2.5
192521_at	vha-5	Vacuolar H ATPase /// locus:vha-5	nematode larval development /// embryonic development ending in birth or egg hatching /// body morphogenesis /// ATP synthesis coupled proton transport /// proton transport /// molting cycle, collagen and cuticulin-based cuticle /// growth /// positive regulation of growth rate /// locomotion /// hermaphrodite genitalia development	hydrogen ion transmembrane transporter activity	membrane /// integral to membrane /// proton-transporting two-sector ATPase complex, proton-transporting domain	1.97
192530_at	---	---	---	---	---	-1.91
192533_at	gst-3	Glutathione S-Transferase /// locus:gst-3	---	glutathione transferase activity /// transferase activity	---	-2.9
192535_s_at	T19D12.6	laminin repeats; EGF-like repeats	---	---	---	2.26
192542_at	nhr-208	Nuclear Hormone Receptor family /// locus:nhr-208	transcription /// regulation of transcription, DNA-dependent	DNA binding /// transcription factor activity /// steroid hormone receptor activity /// receptor activity /// ligand-dependent nuclear receptor activity /// zinc ion binding /// sequence-specific DNA binding /// metal ion binding	nucleus	2.37
192556_s_at	glt-5	GLutamate Transporter family /// locus:glt-5	dicarboxylic acid transport	sodium:dicarboxylate symporter activity	membrane /// integral to membrane	4.39
192563_at	pbo-5	PBOc defective (defecation)	transport /// ion transport /// defecation /// positive regulation of striated muscle contraction	extracellular ligand-gated ion channel activity /// neurotransmitter receptor activity	membrane /// integral to membrane /// postsynaptic membrane	3.26
192575_at	R06B9.1	dihydroxyvitamin D3-induced protein	signal transduction /// sensory perception	protein binding	---	-1.83
192580_s_at	D2085.3	translation initiation factor (EIF)	reproduction /// nematode larval development /// embryonic development ending in birth or egg hatching /// body morphogenesis /// growth /// positive regulation of growth rate /// positive regulation of multicellular organism growth /// hermaphrodite genitalia development	binding /// transferase activity	---	2.18
192596_s_at	T03F7.7	hypothetical protein	---	---	---	1.96
192617_at	sod-3	SOD (superoxide dismutase) /// locus:sod-3	superoxide metabolic process /// determination of adult life span /// oxidation reduction	superoxide dismutase activity /// oxidoreductase activity /// manganese ion binding /// metal ion binding	mitochondrion /// mitochondrial matrix	1.84
192621_s_at	---	---	---	---	---	-2
192652_at	F59B10.3	cadherin transmembranous domain	embryonic development ending in birth or egg hatching	---	membrane /// integral to membrane	-1.92
192656_s_at	K10G9.1	sodium/phosphate transporter protein	transport	transporter activity	integral to membrane	-1.86
192674_s_at	sqt-1	SQuaT /// locus:sqt-1	embryonic development ending in birth or egg hatching /// body morphogenesis /// collagen and cuticulin-based cuticle development /// positive regulation of growth rate /// negative regulation of multicellular organism growth	structural constituent of cuticle	integral to membrane	2.63
192689_s_at	pbs-7	Proteasome Beta Subunit /// locus:pbs-7	reproduction /// nematode larval development /// ubiquitin-dependent protein catabolic process /// embryonic development ending in birth or egg hatching /// growth /// locomotion	threonine-type endopeptidase activity	proteasome core complex	1.82
192699_s_at	aqp-2	AQuaPorin or aquaglyceroporin related	transport	transporter activity	membrane /// integral to membrane	2.64
192714_at	elc-2	ELongin C /// locus:elc-2	ubiquitin-dependent protein catabolic process	protein binding	---	-2.13
192737_at	scl-2	SCP-Like extracellular protein /// locus:scl-2	---	---	extracellular region	-1.96
192738_at	unc-7	UNCoordinated /// locus:unc-7	gap junction assembly /// oviposition /// locomotion /// response to chemical stimulus /// regulation of pharyngeal pumping /// regulation of pharyngeal pumping	---	plasma membrane /// gap junction /// gap junction /// membrane /// integral to membrane /// integral to membrane /// cell junction	-1.9
192740_at	F09A5.1	tetracycline resistance like protein	transport	transporter activity	integral to membrane	2.99
192747_at	hex-1	HEXosaminidase /// locus:hex-1	carbohydrate metabolic process /// carbohydrate metabolic process /// metabolic process	catalytic activity /// beta-N-acetylhexosaminidase activity /// beta-N-acetylhexosaminidase activity /// hydrolase activity /// hydrolase activity, acting on glycosyl bonds /// cation binding	lysosome	-2.1
192748_s_at	nhr-245	Nuclear Hormone Receptor family /// Nuclear Hormone Receptor family /// locus:nhr-73 /// locus:nhr-245	transcription /// regulation of transcription, DNA-dependent	DNA binding /// transcription factor activity /// steroid hormone receptor activity /// protein binding /// zinc ion binding /// sequence-specific DNA binding /// metal ion binding	nucleus	-1.94
192748_s_at	nhr-73	Nuclear Hormone Receptor family /// Nuclear Hormone Receptor family /// locus:nhr-73 /// locus:nhr-245	transcription /// regulation of transcription, DNA-dependent	DNA binding /// transcription factor activity /// steroid hormone receptor activity /// protein binding /// zinc ion binding /// sequence-specific DNA binding /// metal ion binding	nucleus	-1.94
192768_at	srp-1	SeRPin /// locus:srp-1	---	serine-type endopeptidase inhibitor activity /// peptidase activity	---	-2.56
192781_s_at	hlh-11	Helix Loop Helix	transcription /// regulation of transcription, DNA-dependent /// regulation of transcription	DNA binding /// transcription regulator activity	nucleus	-2.1
192782_at	nhr-68	Nuclear Hormone Receptor family /// locus:nhr-68	transcription /// regulation of transcription, DNA-dependent	DNA binding /// transcription factor activity /// steroid hormone receptor activity /// receptor activity /// ligand-dependent nuclear receptor activity /// zinc ion binding /// sequence-specific DNA binding /// metal ion binding	nucleus	1.86
192794_at	twk-24	TWiK family of potassium channels	transport /// ion transport /// potassium ion transport	ion channel activity /// potassium channel activity	membrane /// integral to membrane	1.99
192819_at	nhr-62	Nuclear Hormone Receptor family	transcription /// regulation of transcription, DNA-dependent	DNA binding /// transcription factor activity /// steroid hormone receptor activity /// receptor activity /// ligand-dependent nuclear receptor activity /// zinc ion binding /// sequence-specific DNA binding /// metal ion binding	nucleus	-1.85
192820_at	gst-5	Glutathione S-Transferase /// locus:gst-5	---	glutathione transferase activity /// transferase activity	---	-1.8
192863_at	srp-2	SeRPin /// locus:srp-2	---	serine-type endopeptidase inhibitor activity /// peptidase activity	---	-3.66
192865_s_at	F40E3.5	serine threonine protein phosphatase	---	hydrolase activity	---	-1.93
192891_s_at	T05H10.1	ubiquitin carboxyl-terminal hydrolase	ubiquitin-dependent protein catabolic process	ubiquitin thiolesterase activity	---	1.84
192894_at	F42F12.3	3-oxo-5-alpha-steroid 4-dehydrogenase	lipid metabolic process /// steroid metabolic process	3-oxo-5-alpha-steroid 4-dehydrogenase activity /// protein binding /// oxidoreductase activity, acting on the CH-CH group of donors	cytoplasm /// membrane /// integral to membrane	-1.97
192940_at	H05L14.2	Zinc finger, C3HC4 type (RING finger)	---	protein binding /// zinc ion binding	---	-1.83
192956_at	gst-6	Glutathione S-Transferase /// locus:gst-6	---	glutathione transferase activity /// transferase activity	---	1.97
192974_at	lbp-5	Lipid Binding Protein /// locus:lbp-5	transport /// locomotion	transporter activity /// binding /// lipid binding	---	2.15
192977_s_at	ruvb-1	RUVB (recombination protein) homolog /// locus:ruvb-1	reproduction /// nematode larval development /// embryonic development ending in birth or egg hatching /// body morphogenesis /// growth /// positive regulation of growth rate /// hermaphrodite genitalia development	nucleotide binding /// DNA helicase activity /// protein binding /// ATP binding /// nucleoside-triphosphatase activity	nucleus	1.92
192987_at	clh-3	CLC-type chloride cHannel	chloride transport	ion channel activity /// voltage-gated chloride channel activity	membrane /// integral to membrane	-2.9
192997_s_at	pat-2	Paralysed Arrest at Two-fold /// locus:pat-2	reproduction /// nematode larval development /// cell adhesion /// integrin-mediated signaling pathway /// embryonic development ending in birth or egg hatching /// oviposition /// growth /// locomotion	receptor activity /// protein binding	integrin complex /// membrane /// integral to membrane	1.92
193007_s_at	pgp-1	P-GlycoProtein related /// locus:pgp-1	transport	nucleotide binding /// ATP binding /// xenobiotic-transporting ATPase activity /// hydrolase activity /// ATPase activity /// nucleoside-triphosphatase activity /// ATPase activity, coupled to transmembrane movement of substances	membrane /// integral to membrane	2.4
193011_at	F12B6.2	hypothetical protein	transport	transporter activity	integral to membrane	2.63
193016_s_at	Y38F1A.6	Iron-containing alcohol dehydrogenases /// hypothetical protein	metabolic process /// molecular hydrogen transport /// oxidation reduction	oxidoreductase activity /// metal ion binding /// hydroxyacid-oxoacid transhydrogenase activity /// hydroxyacid-oxoacid transhydrogenase activity	mitochondrion /// mitochondrion	2.65
193045_at	ZK563.2	sodium-dependent phosphate transporter /// hypothetical protein	phosphate transport	sodium-dependent phosphate transmembrane transporter activity	membrane /// integral to membrane	-1.89
193065_at	vps-35	related to yeast Vacuolar Protein Sorting factor /// locus:vps-35	reproduction /// embryonic development ending in birth or egg hatching /// oviposition /// locomotion /// positive regulation of multicellular organism growth	---	---	2.36
193066_s_at	gcy-11	Guanylyl CYclase /// locus:gcy-11	protein amino acid phosphorylation /// intracellular signaling cascade /// cyclic nucleotide biosynthetic process	protein kinase activity /// protein serine/threonine kinase activity /// protein tyrosine kinase activity /// ATP binding /// phosphorus-oxygen lyase activity	membrane /// integral to membrane	-1.83
193068_at	opt-2	OligoPeptide Transporter /// locus:opt-2	reproduction /// reproduction /// nematode larval development /// nematode larval development /// transport /// oligopeptide transport /// regulation of pH /// response to oxidative stress /// response to oxidative stress /// determination of adult life span /// determination of adult life span /// response to heat /// response to heat /// protein transport /// sequestering of lipid /// growth //…	transporter activity /// oligopeptide transporter activity /// dipeptide transporter activity	membrane /// integral to membrane	3.67
193073_at	ifc-2	Intermediate Filament, C	morphogenesis of an epithelium /// determination of adult life span /// body morphogenesis /// molting cycle, collagen and cuticulin-based cuticle /// collagen and cuticulin-based cuticle development /// positive regulation of growth rate /// locomotion /// positive regulation of multicellular organism growth	structural molecule activity /// protein binding	cytoplasm /// intermediate filament	2.13
193082_s_at	lmn-1	nuclear LaMiN /// locus:lmn-1	reproduction /// mitotic cell cycle /// nematode larval development /// nucleus organization /// nuclear pore organization /// chromosome segregation /// germ cell development /// protein localization /// embryonic development ending in birth or egg hatching /// body morphogenesis /// locomotion /// hermaphrodite genitalia development /// chromosome decondensation	structural molecule activity /// protein binding	nucleus /// nuclear inner membrane /// intermediate filament /// membrane	2.04
193085_at	snf-1	Sodium:Neurotransmitter symporter Family /// locus:snf-1	transport /// neurotransmitter transport	neurotransmitter:sodium symporter activity /// symporter activity	integral to plasma membrane /// membrane /// integral to membrane	1.96
193095_at	ZC84.1	Serine protease inhibitor, Kunitz type /// hypothetical protein	---	endopeptidase inhibitor activity /// serine-type endopeptidase inhibitor activity	---	-1.88
193103_s_at	mog-4	Masculinisation Of Germline /// locus:mog-4	reproduction /// nematode larval development /// mRNA processing /// multicellular organismal development /// RNA splicing /// embryonic development ending in birth or egg hatching /// molting cycle, collagen and cuticulin-based cuticle /// growth /// positive regulation of growth rate /// feminization of hermaphroditic germ-line /// positive regulation of vulval development /// hermaphrodite gen…	nucleotide binding /// nucleic acid binding /// helicase activity /// protein binding /// ATP binding /// ATP-dependent helicase activity /// hydrolase activity	nucleus	2.16
193111_s_at	sur-5	SUppressor of activated let-60 Ras /// locus:sur-5	lipid metabolic process /// fatty acid metabolic process /// metabolic process	catalytic activity /// ligase activity /// acetoacetate-CoA ligase activity	nucleus /// cytoplasm	2.03
193130_at	clec-97	C-type LECtin /// locus:clec-97	---	binding	---	2.54
193138_at	F43G6.11	hypothetical protein	---	hydrolase activity	---	-2.34
193161_at	K01G5.5	centromere/microtubule binding protein	reproduction /// pseudouridine synthesis /// nematode larval development /// rRNA processing /// growth /// positive regulation of growth rate /// ribosome biogenesis	RNA binding /// pseudouridine synthase activity /// isomerase activity	nucleus /// ribonucleoprotein complex	2.23
193187_s_at	mrp-2	Multidrug Resistance Protein family /// locus:mrp-2	transport	nucleotide binding /// transporter activity /// ATP binding /// ATPase activity /// nucleoside-triphosphatase activity /// ATPase activity, coupled to transmembrane movement of substances	integral to membrane	2.46
193196_at	srd-21	Serpentine Receptor, class D (delta) /// locus:srd-21	---	---	integral to membrane	-1.88
193200_s_at	gale-1	UDP-GALactose 4-Epimerase	carbohydrate metabolic process /// galactose metabolic process /// metabolic process /// cellular metabolic process	catalytic activity /// UDP-glucose 4-epimerase activity /// binding /// protein binding /// racemase and epimerase activity, acting on carbohydrates and derivatives /// coenzyme binding	---	2.16
193213_at	ifc-1	Intermediate Filament, C /// locus:ifc-1	nematode larval development /// embryonic development ending in birth or egg hatching /// body morphogenesis /// growth	structural molecule activity	cytoplasm /// intermediate filament	2.46
193218_s_at	T01D3.3	hypothetical protein	superoxide metabolic process /// embryonic development ending in birth or egg hatching	protease inhibitor activity /// metal ion binding	extracellular region	6.01
193239_at	C41C4.3	Leucine Rich Repeat (2 copies) (2 domains)	---	protein binding	---	-2.23
193247_at	flp-3	FMRF-Like Peptide /// locus:flp-3	neuropeptide signaling pathway	hormone activity	extracellular region	-1.88
193262_at	unc-38	UNCoordinated /// locus:unc-38	transport /// ion transport /// locomotion /// regulation of oviposition	receptor activity /// nicotinic acetylcholine-activated cation-selective channel activity /// ion channel activity /// extracellular ligand-gated ion channel activity /// neurotransmitter receptor activity	plasma membrane /// membrane /// integral to membrane /// cell junction /// synapse /// postsynaptic membrane	-3.66
193270_at	far-4	Fatty Acid/Retinol binding protein /// locus:far-4	---	lipid binding	integral to membrane	-1.89
193271_s_at	F11C1.5	hypothetical protein	translation	nucleotide binding /// structural constituent of ribosome /// ATP binding /// ATPase activity /// nucleoside-triphosphatase activity	intracellular /// ribosome	2.21
193272_s_at	far-3	Fatty Acid/Retinol binding protein /// locus:far-3	---	lipid binding	---	2.01
193292_at	C53C7.1	hypothetical protein	G-protein coupled receptor protein signaling pathway	neuropeptide Y receptor activity /// protein binding	integral to membrane	-2.07
193294_at	C02B8.6	DNA repair protein RAD16 (yeast, weak)	---	protein binding /// zinc ion binding /// metal ion binding	---	-1.86
193307_at	Y38H6C.8	Lectin C-type domain short and long forms /// hypothetical protein	---	binding /// protein binding	---	5.83
193319_at	sym-5	SYnthetic lethal with Mec /// locus:sym-5	embryonic development ending in birth or egg hatching /// embryonic development ending in birth or egg hatching /// positive regulation of growth rate /// locomotion /// positive regulation of multicellular organism growth	protein binding	integral to membrane	2.12
193321_at	ifd-1	Intermediate Filament, D	embryonic development ending in birth or egg hatching /// positive regulation of multicellular organism growth	structural molecule activity /// protein binding	cytoplasm /// intermediate filament	2.69
193328_at	scl-20	SCP-Like extracellular protein /// locus:scl-20	---	---	extracellular region	-12.59
193344_at	sym-1	SYnthetic lethal with Mec /// locus:sym-1	---	protein binding	---	1.8
193360_s_at	F21D5.7	signal recognition particle protein (SRP54)	reproduction /// nematode larval development /// SRP-dependent cotranslational protein targeting to membrane	nucleotide binding /// GTP binding /// 7S RNA binding /// nucleoside-triphosphatase activity	signal recognition particle	1.9
193372_at	athp-1	AT Hook plus PHD finger transcription factor /// locus:athp-1	reproduction	DNA binding /// calcium ion binding /// protein binding /// zinc ion binding /// metal ion binding	extracellular region /// nucleus	1.83
193379_at	srd-18	Serpentine Receptor, class D (delta) /// locus:srd-18	---	---	membrane /// integral to membrane	-2.12
193389_at	C33A12.12	Leucine Rich Repeat (2 copies) (2 domains)	---	binding	---	-1.86
193393_at	unc-129	UNCoordinated /// locus:unc-129	axon guidance	protein binding /// growth factor activity	extracellular region	1.84
[truncated: 76 more rows]
