# Supplementary material for: A Two-tiered compensatory response to loss of DNA repair modulates aging and stress response pathways
Source: Aging (Albany NY). 2010 Mar 29;2(3):133–59. doi: 10.18632/aging.100127 (PMC2871243; doi:10.18632/aging.100127)
Supplement: Supplementary Table 3 [file aging-02-133-s003.xls]

## Sheet: N2 vs xpa-1
Comparative results from wildtype N2 vs. xpa-1
Probe Set ID	Gene Symbol	Gene Title	go biological process term	go molecular function term	go cellular component term	fold change
171730_x_at	vap-1	Venom-Allergen-like Protein	---	---	extracellular region	-3.02
171733_x_at	F23F12.9	hypothetical protein	regulation of transcription, DNA-dependent	transcription factor activity /// sequence-specific DNA binding /// protein dimerization activity	nucleus	-2.17
171739_x_at	F35A5.1	hypothetical protein /// status:Partially_confirmed	---	---	---	1.85
171740_x_at	clh-1	CLC-type chloride cHannel	chloride transport	ion channel activity /// voltage-gated chloride channel activity	membrane /// integral to membrane	-1.99
171746_x_at	F15G9.1	hypothetical protein	---	---	---	-1.97
171752_x_at	C18C4.5	hypothetical protein	---	---	---	-2.32
171765_x_at	ksr-2	Kinase Suppressor of activated Ras	protein amino acid phosphorylation /// intracellular signaling cascade	protein kinase activity /// protein serine/threonine kinase activity /// protein tyrosine kinase activity /// ATP binding /// zinc ion binding /// metal ion binding	---	1.9
171766_x_at	F29G6.3	hypothetical protein	reproduction /// body morphogenesis /// positive regulation of growth rate	protein binding	---	2.2
171769_x_at	F23F12.12	hypothetical protein /// status:Confirmed	---	---	integral to membrane	-3.52
171792_x_at	tni-3	TropoNin I /// locus:tni-3	nematode larval development /// muscle contraction /// oviposition /// post-embryonic body morphogenesis	actin binding /// protein binding	---	-1.87
171796_x_at	C02E7.6	hypothetical protein /// status:Confirmed	---	---	---	2.2
171802_s_at		Phosphoinositide 3-kinase family, accessory domain (PIK domain) ; Phosphatidylinositol 3- and 4-kinases /// hypothetical protein	reproduction /// cell death /// phosphoinositide phosphorylation /// phosphoinositide-mediated signaling	inositol or phosphatidylinositol kinase activity /// binding /// phosphotransferase activity, alcohol group as acceptor	---	2.59
171809_s_at	F55A3.3	transcritpion factor	gastrulation with mouth forming first /// DNA replication /// DNA repair /// transcription /// regulation of transcription, DNA-dependent /// proteolysis /// response to DNA damage stimulus /// embryonic development /// embryonic development ending in birth or egg hatching /// cellular process /// molting cycle, collagen and cuticulin-based cuticle	metalloexopeptidase activity	nucleus /// chromosome	1.81
171839_x_at	ztf-3	locus:ztf-3 /// Zinc finger Transcription Factor family	embryonic development ending in birth or egg hatching /// collagen and cuticulin-based cuticle development /// positive regulation of multicellular organism growth	nucleic acid binding /// zinc ion binding	intracellular	-2.08
171841_x_at	hlh-11	Helix Loop Helix	transcription /// regulation of transcription, DNA-dependent /// regulation of transcription	DNA binding /// transcription regulator activity	nucleus	-2.12
171846_x_at	---	---	---	---	---	3.32
171861_x_at	---	---	---	---	---	1.93
171871_x_at	rsr-1	SR protein related /// locus:rsr-1	gastrulation with mouth forming first /// mRNA processing /// embryonic development /// embryonic development ending in birth or egg hatching /// locomotion	---	---	2.38
171874_x_at	eft-4	Elongation FacTor	reproduction /// nematode larval development /// translation /// translational elongation /// gamete generation /// embryonic development ending in birth or egg hatching /// growth /// positive regulation of growth rate /// locomotion	nucleotide binding /// translation elongation factor activity /// GTPase activity /// GTP binding	cytoplasm /// cytoplasm	-1.83
171883_x_at	K02F6.7	hypothetical protein /// status:Partially_confirmed	---	---	---	1.9
171894_x_at	rhgf-2	RHo Guanine nucleotide exchange Factor /// locus:rhgf-2	embryonic development ending in birth or egg hatching /// regulation of Rho protein signal transduction	Rho guanyl-nucleotide exchange factor activity	intracellular	2.09
171904_x_at	D1054.11	hypothetical protein /// status:Confirmed	---	---	---	1.92
171910_x_at	aqp-2	AQuaPorin or aquaglyceroporin related	transport	transporter activity	membrane /// integral to membrane	1.84
171923_x_at		Iron-containing alcohol dehydrogenases /// hypothetical protein	metabolic process /// molecular hydrogen transport /// oxidation reduction	oxidoreductase activity /// metal ion binding /// hydroxyacid-oxoacid transhydrogenase activity /// hydroxyacid-oxoacid transhydrogenase activity	mitochondrion /// mitochondrion	1.89
171925_x_at	C46H3.2	hypothetical protein	---	---	---	1.93
171932_x_at	F09C8.1	phospholipase precursor	lipid metabolic process	hydrolase activity, acting on ester bonds	integral to membrane	-4.21
171941_s_at	F44E5.5	Heat shock hsp70 proteins /// Heat shock hsp70 proteins	positive regulation of growth rate	ATP binding	---	-7.2
171945_x_at	mlt-10	MoLTing defective /// locus:mlt-10	---	---	integral to membrane	2.05
171948_x_at	tba-2	TuBulin, Alpha /// locus:tba-2	cytokinesis /// nematode larval development /// microtubule-based process /// microtubule-based movement /// mitotic spindle organization /// protein localization /// embryonic development ending in birth or egg hatching /// pronuclear migration /// growth /// protein polymerization /// centrosome localization	nucleotide binding /// GTPase activity /// structural molecule activity /// GTP binding	microtubule /// protein complex	1.87
171970_x_at	H39E23.3	hypothetical protein /// status:Partially_confirmed	---	---	---	-2.73
171982_x_at	flp-1	FMRF-Like Peptide	neuropeptide signaling pathway	---	extracellular region	-9.92
171983_s_at		Cysteine proteases (2 domains) /// hypothetical protein	proteolysis	cysteine-type peptidase activity	---	-1.83
171986_x_at	fip-2	Fungus-Induced Protein /// locus:fip-2	---	---	---	-3.51
171992_x_at	---	---	---	---	---	2.16
171999_x_at	clh-1	CLC-type chloride cHannel	chloride transport	ion channel activity /// voltage-gated chloride channel activity	membrane /// integral to membrane	-1.93
172002_x_at	lec-7	Lec-7 mRNA, complete cds, splicing variant lec-7a	---	sugar binding	---	3.07
172003_x_at	lec-7	gaLECtin /// locus:lec-7	---	sugar binding	---	2.63
172005_x_at	sur-2	SUppressor of activated let-60 Ras	transcription /// regulation of transcription, DNA-dependent /// defense response /// multicellular organismal development /// determination of adult life span /// embryonic development ending in birth or egg hatching /// oviposition /// defecation /// positive regulation of growth rate /// locomotion /// negative regulation of vulval development /// regulation of protein catabolic process	---	nucleus	1.91
172009_x_at		status:Confirmed /// hypothetical protein	reproduction /// nematode larval development /// embryonic development ending in birth or egg hatching /// growth /// positive regulation of growth rate	zinc ion binding /// metal ion binding	intracellular	-1.95
172015_x_at	Y82E9BR.17	hypothetical protein	---	zinc ion binding	intracellular	-2.8
172020_x_at	lin-36	abnormal cell LINeage /// locus:lin-36	nematode larval development /// multicellular organismal development /// growth /// negative regulation of vulval development /// embryonic digestive tract morphogenesis	nucleic acid binding /// DNA binding /// zinc ion binding /// metal ion binding	intracellular /// nucleus	1.92
172026_x_at	vap-1	Venom-Allergen-like Protein	---	---	extracellular region	-3.48
172032_x_at	rnt-1	RuNT related /// locus:rnt-1	regulation of transcription, DNA-dependent /// embryonic development ending in birth or egg hatching /// regulation of transcription	DNA binding /// transcription factor activity /// ATP binding	nucleus	-1.87
172046_x_at	hgo-1	HomoGentisate Oxidase /// locus:hgo-1	L-phenylalanine catabolic process /// tyrosine metabolic process /// tyrosine catabolic process /// oxidation reduction	homogentisate 1,2-dioxygenase activity /// iron ion binding /// oxidoreductase activity /// oxidoreductase activity, acting on single donors with incorporation of molecular oxygen, incorporation of two atoms of oxygen /// identical protein binding /// metal ion binding	---	-2.61
172050_x_at		status:Predicted /// hypothetical protein	---	---	---	2.29
172051_x_at		status:Predicted /// hypothetical protein	---	---	---	-2.23
172053_x_at	---	---	---	---	---	1.87
172069_x_at	cpr-3	Cysteine PRotease related /// locus:cpr-3	proteolysis /// embryonic development ending in birth or egg hatching	cysteine-type endopeptidase activity /// peptidase activity /// cysteine-type peptidase activity /// hydrolase activity	---	-2.72
172070_x_at	K06A9.1	hypothetical protein	---	---	integral to membrane	2.31
172072_x_at	dnj-5	DNaJ domain (prokaryotic heat shock protein)	response to stress	heat shock protein binding	integral to membrane	2.26
172109_x_at	tpxl-1	TPX2 (Targeting Protein for Xenopus Klp2)-Like	reproduction /// nematode larval development /// mitotic spindle organization /// embryonic development ending in birth or egg hatching	protein binding	---	1.87
172118_x_at		status:Predicted /// hypothetical protein	---	---	integral to membrane	-2.67
172123_x_at	unc-44	UNCoordinated	carbohydrate metabolic process /// signal transduction /// body morphogenesis /// positive regulation of growth rate /// locomotion /// positive regulation of locomotion /// positive regulation of multicellular organism growth	hydrolase activity, hydrolyzing O-glycosyl compounds /// protein binding /// protein binding	---	3.02
172140_x_at	dlc-4	Dynein Light Chain /// locus:dlc-4	microtubule-based process	microtubule motor activity	microtubule associated complex	-1.84
172147_x_at	M116.5	hypothetical protein /// status:Partially_confirmed	cell cycle arrest	actin binding	---	2.28
172153_x_at	unc-44	UNCoordinated	carbohydrate metabolic process /// signal transduction /// body morphogenesis /// positive regulation of growth rate /// locomotion /// positive regulation of locomotion /// positive regulation of multicellular organism growth	hydrolase activity, hydrolyzing O-glycosyl compounds /// protein binding /// protein binding	---	3.2
172162_x_at	B0546.5F16D3.6F35E2.1	hypothetical protein /// hypothetical protein /// hypothetical protein /// status:Partially_confirmed /// status:Predicted /// status:Partially_confirmed	---	---	integral to membrane	-2.08
172184_x_at	clec-174	C-type LECtin /// locus:clec-174	---	binding	---	-3.97
172200_x_at	C28D4.5	hypothetical protein /// status:Partially_confirmed	---	---	---	2.02
172218_x_at	dod-6	Downstream Of DAF-16 (regulated by DAF-16) /// locus:dod-6	determination of adult life span	---	integral to membrane	-3.38
172233_at	T02D1.7	hypothetical protein /// status:Partially_confirmed	---	---	---	-3.21
172236_x_at	T24F1.5	hypothetical protein /// status:Partially_confirmed	---	---	---	-2.64
172240_x_at	cnc-7	CaeNaCin (Caenorhabditis bacteriocin) /// locus:cnc-7	---	---	integral to membrane	-9.05
172241_x_at	fipr-24	FIP (Fungus-Induced Protein) Related /// locus:fipr-24	---	---	integral to membrane	-1.94
172248_x_at	T20G5.8	hypothetical protein /// status:Confirmed	determination of adult life span	---	integral to membrane	-5.51
172268_x_at	nspc-20	Nematode Specific Peptide family, group C /// locus:nspc-20 /// locus:nspc-16 /// locus:nspc-19	---	---	---	-2.42
172281_at	F31A9.2	hypothetical protein /// status:Partially_confirmed	embryonic development ending in birth or egg hatching	---	---	-2.77
172284_x_at	fip-2	Fungus-Induced Protein /// locus:fip-2	---	---	---	-2.83
172305_x_at		status:Confirmed /// hypothetical protein	reproduction /// embryonic development ending in birth or egg hatching /// positive regulation of growth rate	---	---	-2.09
172309_x_at	C08E3.1	hypothetical protein /// status:Predicted /// status:Confirmed	---	---	---	-1.99
172313_x_at	B0546.5	hypothetical protein /// status:Partially_confirmed	---	---	integral to membrane	-1.98
172324_x_at	nspc-1 nspc-10 nspc-12 nspc-13 nspc-14 nspc-15 nspc-2 nspc-3 nspc-4 nspc-5 nspc-6 nspc-9	Nematode Specific Peptide family, group C /// Nematode Specific Peptide family, group C /// Nematode Specific Peptide family, group C /// Nematode Specific Peptide family, group C /// Nematode Specific Peptide family, group C /// Nematode Specific Peptide family, group C /// Nematode Specific Peptide family, group C /// Nematode Specific Peptide family, group C /// Nematode Specific Peptide famil…	---	---	---	-2.4
172334_x_at	nspc-1 nspc-10 nspc-12 nspc-13 nspc-14 nspc-15 nspc-2 nspc-3 nspc-4 nspc-5 nspc-6 nspc-9	Nematode Specific Peptide family, group C /// Nematode Specific Peptide family, group C /// Nematode Specific Peptide family, group C /// Nematode Specific Peptide family, group C /// Nematode Specific Peptide family, group C /// Nematode Specific Peptide family, group C /// Nematode Specific Peptide family, group C /// Nematode Specific Peptide family, group C /// Nematode Specific Peptide famil…	---	---	---	-2.48
172340_x_at	C35B1.3	hypothetical protein /// status:Confirmed	---	---	integral to membrane	-34.21
172343_x_at	nlp-31	Neuropeptide-Like Protein /// locus:nlp-31	xenobiotic metabolic process /// neuropeptide signaling pathway /// defense response to bacterium /// defense response to fungus	---	extracellular region /// integral to membrane	-2.1
172352_at	C33A12.4	hypothetical protein /// status:Confirmed	---	---	---	-3.45
172357_x_at	nspc-10 nspc-12 nspc-13 nspc-14 nspc-15 nspc-2 nspc-3 nspc-6 nspc-9	Nematode Specific Peptide family, group C /// Nematode Specific Peptide family, group C /// Nematode Specific Peptide family, group C /// Nematode Specific Peptide family, group C /// Nematode Specific Peptide family, group C /// Nematode Specific Peptide family, group C /// Nematode Specific Peptide family, group C /// Nematode Specific Peptide family, group C /// Nematode Specific Peptide famil…	---	---	---	-2.44
172363_x_at	F53A9.6	hypothetical protein /// status:Confirmed	---	---	---	-2.1
172375_x_at	nlp-29	Neuropeptide-Like Protein /// locus:nlp-29	xenobiotic metabolic process /// neuropeptide signaling pathway /// defense response to bacterium /// defense response to fungus	---	extracellular region /// integral to membrane	-2.46
172384_x_at	---	---	---	---	---	-3.96
172389_x_at	Y43D4A.3Y43D4A.4	hypothetical protein /// hypothetical protein	transport	transporter activity	integral to membrane	1.81
172395_at	F22F4.4	hypothetical protein /// status:Confirmed	---	---	---	-3.14
172397_x_at	K09E3.4	hypothetical protein /// status:Confirmed	---	---	---	-2.1
172405_x_at	cnc-3	CaeNaCin (Caenorhabditis bacteriocin) /// locus:cnc-3	---	---	integral to membrane	-2.46
172413_at	F52E10.3	hypothetical protein /// status:Predicted	---	---	---	-2.13
172416_x_at	B0391.10	hypothetical protein /// status:Confirmed	---	---	---	2.53
172426_x_at	F20A1.1	hypothetical protein /// status:Confirmed	---	---	---	-2.53
172427_x_at	nlp-28	Neuropeptide-Like Protein /// locus:nlp-28	neuropeptide signaling pathway	---	extracellular region /// integral to membrane	-3.22
172446_x_at	T16A1.5	hypothetical protein /// status:Predicted	---	---	---	3.2
172447_at	M03D4.3	hypothetical protein /// status:Partially_confirmed	---	---	integral to membrane	-2.36
172455_x_at	F29G6.3	hypothetical protein	reproduction /// body morphogenesis /// positive regulation of growth rate	protein binding	---	2.22
172464_x_at	F54D12.4	hypothetical protein /// status:Partially_confirmed	nematode larval development /// body morphogenesis /// growth /// locomotion	---	---	1.88
172468_x_at	K01A2.9	hypothetical protein /// status:Predicted	---	---	integral to membrane	-2.88
172475_x_at	col-145	COLlagen /// locus:col-145	---	structural constituent of cuticle	integral to membrane	2.48
172481_x_at	math-3	MATH (meprin-associated Traf homology) domain containing	---	---	---	2.29
172490_at	F39F10.4	hypothetical protein /// status:Confirmed	---	---	---	-3.23
172499_x_at	F07G11.2	hypothetical protein /// status:Predicted	---	---	---	-2.58
172501_at	F19B10.3	hypothetical protein /// status:Predicted	---	---	---	-1.99
172514_x_at	ubl-5	UBiquitin-Like family /// locus:ubl-5	reproduction /// nematode larval development /// protein modification process /// ubiquitin-dependent protein catabolic process /// growth /// positive regulation of growth rate /// locomotion	---	cytoplasm	-2.24
172515_x_at	W08A12.2	hypothetical protein /// status:Confirmed	---	---	integral to membrane	-2.78
172526_x_at	mps-2	MiRP K channel accessory Subunit	regulation of chemotaxis	---	integral to membrane	-2.37
172541_x_at	mps-2	MiRP K channel accessory Subunit	regulation of chemotaxis	---	integral to membrane	-2.44
172565_x_at	C08E3.13	hypothetical protein /// status:Predicted /// status:Confirmed	---	---	---	-2.15
172568_x_at	Y43F8B.2	hypothetical protein	---	protein binding	---	-2.52
172570_x_at		status:Confirmed /// hypothetical protein	---	---	integral to membrane	-1.93
172575_x_at	C13A2.10	hypothetical protein /// status:Partially_confirmed	---	---	---	-2.48
172578_x_at	Y43F8B.2	hypothetical protein	---	protein binding	---	-2.47
172579_x_at	F59E12.6	hypothetical protein	ubiquitin-dependent protein catabolic process /// embryonic development ending in birth or egg hatching	ubiquitin thiolesterase activity	---	4.37
172581_s_at	F32D8.12	hypothetical protein	---	catalytic activity /// oxidoreductase activity /// FAD binding	---	3.19
172588_x_at	flp-21	FMRF-Like Peptide /// locus:flp-21	---	---	---	-2.44
172593_x_at	---	---	---	---	---	-2.32
172596_x_at	fbxa-58	F-box A protein /// locus:fbxa-58	---	---	---	-1.88
172618_x_at	his-28 his-50	HIStone /// HIStone /// locus:his-28 /// locus:his-50	reproduction /// nematode larval development /// nucleosome assembly /// defense response /// embryonic development ending in birth or egg hatching /// body morphogenesis /// growth /// positive regulation of growth rate /// locomotion /// hermaphrodite genitalia development	DNA binding	nucleosome /// nucleus /// chromosome	-1.81
172620_x_at	Y105C5B.12	hypothetical protein	reproduction /// one-carbon compound metabolic process /// positive regulation of growth rate /// locomotion /// positive regulation of locomotion /// hermaphrodite genitalia development	methionine adenosyltransferase activity /// ATP binding	---	2.2
172624_x_at	nspe-3	locus:nspe-3 /// hypothetical protein	---	---	integral to membrane	1.82
172646_x_at	---	---	---	---	---	-2.2
172654_x_at	Y71F9B.13	hypothetical protein	---	---	---	-1.94
172661_x_at	his-31	HIStone /// locus:his-31	reproduction /// nematode larval development /// nucleosome assembly /// defense response /// embryonic development ending in birth or egg hatching /// body morphogenesis /// growth /// positive regulation of growth rate /// locomotion /// hermaphrodite genitalia development	DNA binding	nucleosome /// nucleus /// chromosome	-2.01
172671_x_at	his-38	HIStone /// locus:his-38	reproduction /// nematode larval development /// nucleosome assembly /// defense response /// embryonic development ending in birth or egg hatching /// body morphogenesis /// growth /// positive regulation of growth rate /// locomotion /// hermaphrodite genitalia development	DNA binding	nucleosome /// nucleus /// chromosome	-2.14
172678_at	---	---	---	---	---	-1.9
172679_x_at	his-46 his-56 his-64	HIStone /// HIStone /// HIStone /// locus:his-46 /// locus:his-56 /// locus:his-64	reproduction /// nematode larval development /// nucleosome assembly /// defense response /// embryonic development ending in birth or egg hatching /// body morphogenesis /// growth /// positive regulation of growth rate /// locomotion /// hermaphrodite genitalia development	DNA binding	nucleosome /// nucleus /// chromosome	-2.07
172692_x_at	his-41	HIStone /// locus:his-41	nematode larval development /// nucleosome assembly /// embryonic development ending in birth or egg hatching /// growth /// locomotion	DNA binding	nucleosome /// nucleus /// chromosome	-1.91
172699_x_at	cin-4	Chromosome INstability /// locus:cin-4	reproduction /// cytokinesis /// DNA metabolic process /// DNA topological change /// embryonic development ending in birth or egg hatching /// cell division	DNA binding /// DNA topoisomerase (ATP-hydrolyzing) activity /// ATP binding	chromosome	2.46
172701_x_at	col-125	COLlagen /// locus:col-125	nematode larval development /// body morphogenesis /// locomotion	structural constituent of cuticle	integral to membrane	2.07
172705_x_at	col-159	COLlagen /// locus:col-159	---	structural constituent of cuticle	integral to membrane	2.38
172713_x_at	nspc-1 nspc-10 nspc-12 nspc-13 nspc-14 nspc-15 nspc-2 nspc-3 nspc-4 nspc-5 nspc-6 nspc-9	Nematode Specific Peptide family, group C /// Nematode Specific Peptide family, group C /// Nematode Specific Peptide family, group C /// Nematode Specific Peptide family, group C /// Nematode Specific Peptide family, group C /// Nematode Specific Peptide family, group C /// Nematode Specific Peptide family, group C /// Nematode Specific Peptide family, group C /// Nematode Specific Peptide famil…	---	---	---	-3.1
172715_x_at	nspc-10 nspc-12 nspc-13 nspc-14 nspc-15 nspc-2 nspc-3 nspc-4 nspc-5 nspc-6 nspc-9	Nematode Specific Peptide family, group C /// Nematode Specific Peptide family, group C /// Nematode Specific Peptide family, group C /// Nematode Specific Peptide family, group C /// Nematode Specific Peptide family, group C /// Nematode Specific Peptide family, group C /// Nematode Specific Peptide family, group C /// Nematode Specific Peptide family, group C /// Nematode Specific Peptide famil…	---	---	---	-2.16
172716_x_at	nspc-10 nspc-12 nspc-13 nspc-14 nspc-15 nspc-2 nspc-3 nspc-6 nspc-9	Nematode Specific Peptide family, group C /// Nematode Specific Peptide family, group C /// Nematode Specific Peptide family, group C /// Nematode Specific Peptide family, group C /// Nematode Specific Peptide family, group C /// Nematode Specific Peptide family, group C /// Nematode Specific Peptide family, group C /// Nematode Specific Peptide family, group C /// Nematode Specific Peptide famil…	---	---	---	-3.04
172735_x_at	col-167 col-168 col-170	COLlagen /// COLlagen /// COLlagen /// locus:col-167 /// locus:col-168 /// locus:col-170	body morphogenesis /// positive regulation of growth rate /// locomotion	structural constituent of cuticle	integral to membrane	2
172736_x_at	col-167	COLlagen /// locus:col-167 /// locus:col-168 /// locus:col-169	body morphogenesis /// positive regulation of growth rate /// locomotion	structural constituent of cuticle	integral to membrane	2.12
172741_x_at	cuticlin	cuticlin	---	---	---	2.17
172744_at	mtl-1	MeTaLlothionein /// locus:mtl-1	determination of adult life span /// response to heat /// positive regulation of growth rate /// response to cadmium ion	calcium ion binding /// cadmium ion binding /// metal ion binding	---	-2.42
172746_x_at	col-166	COLlagen /// locus:col-169 /// locus:col-170	body morphogenesis /// positive regulation of growth rate /// locomotion	structural constituent of cuticle	integral to membrane	2.17
172761_x_at	his-1	HIStone /// locus:his-1	reproduction /// nematode larval development /// nucleosome assembly /// defense response /// embryonic development ending in birth or egg hatching /// body morphogenesis /// growth /// positive regulation of growth rate /// locomotion /// hermaphrodite genitalia development	DNA binding	nucleosome /// nucleus /// chromosome	-1.8
172768_x_at	cyp-33C5	CYtochrome P450 family /// locus:cyp-33C5	positive regulation of growth rate	monooxygenase activity /// iron ion binding /// electron carrier activity /// heme binding	---	2.01
172769_x_at	cyp-33C4	CYtochrome P450 family /// locus:cyp-33C4	---	monooxygenase activity /// iron ion binding /// electron carrier activity /// heme binding	---	2.03
172775_x_at	F25D7.4	claustrin like	---	---	---	2.99
172776_x_at	C36A4.5	claustrin like	---	---	integral to membrane	2.59
172787_x_at	his-64	HIStone /// locus:his-64	reproduction /// nematode larval development /// nucleosome assembly /// defense response /// embryonic development ending in birth or egg hatching /// body morphogenesis /// growth /// positive regulation of growth rate /// locomotion /// hermaphrodite genitalia development	DNA binding	nucleosome /// nucleus /// chromosome	-2.13
172793_x_at	cpr-3	Cysteine PRotease related /// locus:cpr-3	proteolysis /// embryonic development ending in birth or egg hatching	cysteine-type endopeptidase activity /// peptidase activity /// cysteine-type peptidase activity /// hydrolase activity	---	-2.67
172799_x_at	cuticlin	cuticlin	---	structural constituent of cuticle	extracellular region	1.82
172803_x_at	col-107	COLlagen	---	structural constituent of cuticle	integral to membrane	2.53
172805_x_at	Y37H9A.5	hypothetical protein	translation /// embryonic development ending in birth or egg hatching /// positive regulation of growth rate /// negative regulation of multicellular organism growth	structural constituent of ribosome	intracellular /// ribosome	-2.43
172838_x_at	abts-1	Anion/Bicarbonate TranSporter family	transport /// anion transport	transporter activity /// inorganic anion exchanger activity /// anion transmembrane transporter activity /// anion exchanger activity	membrane /// integral to membrane	2.16
172849_x_at	---	---	---	---	---	-2.62
172872_x_at	T23F2.3	blt101 protein-barley	---	---	membrane /// integral to membrane	-2.52
172873_x_at	sel-5	Suppressor/Enhancer of Lin-12	protein amino acid phosphorylation /// embryonic development ending in birth or egg hatching	protein kinase activity /// protein serine/threonine kinase activity /// protein tyrosine kinase activity /// ATP binding /// kinase activity	---	1.84
172878_x_at	col-13	COLlagen /// locus:col-12 /// locus:col-13	---	structural constituent of cuticle	integral to membrane	1.81
172879_x_at	col-12	COLlagen /// locus:col-12 /// locus:col-13	---	structural constituent of cuticle	integral to membrane	1.85
172888_x_at	math-20	MATH (meprin-associated Traf homology) domain containing /// locus:math-20	---	---	---	-2.03
172901_x_at	hsp-16.48	Heat Shock Protein /// Heat Shock Protein /// locus:hsp-16.48 /// locus:hsp-16.49	response to stress /// determination of adult life span /// determination of adult life span /// response to heat /// endoplasmic reticulum unfolded protein response	---	---	-15.99
172901_x_at	hsp-16.49	Heat Shock Protein /// Heat Shock Protein /// locus:hsp-16.48 /// locus:hsp-16.49	response to stress /// determination of adult life span /// determination of adult life span /// response to heat /// endoplasmic reticulum unfolded protein response	---	---	-15.99
172932_x_at	unc-52	UNCoordinated	nematode larval development /// cell adhesion /// epidermal growth factor receptor signaling pathway /// muscle development /// determination of adult life span /// embryonic development ending in birth or egg hatching /// embryonic development ending in birth or egg hatching /// cell migration /// molting cycle, collagen and cuticulin-based cuticle /// myofibril assembly /// positive regulation …	calcium ion binding	extracellular region /// proteinaceous extracellular matrix /// proteinaceous extracellular matrix /// basement membrane /// extracellular matrix	2.61
172945_s_at	F13C5.1	hypothetical protein /// status:Partially_confirmed	---	---	integral to membrane	-2.63
172960_x_at	hgo-1	HomoGentisate Oxidase /// locus:hgo-1	L-phenylalanine catabolic process /// tyrosine metabolic process /// tyrosine catabolic process /// oxidation reduction	homogentisate 1,2-dioxygenase activity /// iron ion binding /// oxidoreductase activity /// oxidoreductase activity, acting on single donors with incorporation of molecular oxygen, incorporation of two atoms of oxygen /// identical protein binding /// metal ion binding	---	-2.64
172984_s_at	kel-8	KELch-repeat containing protein /// locus:kel-8	---	protein binding /// protein binding	---	2.44
173018_s_at	pqn-59	Prion-like-(Q/N-rich)-domain-bearing protein /// locus:pqn-59	reproduction /// nematode larval development /// embryonic development ending in birth or egg hatching /// growth /// locomotion	protein binding	---	1.82
173024_s_at	cpsf-1	Cleavage and Polyadenylation Specificity Factor /// locus:cpsf-1	reproduction /// nematode larval development /// mRNA polyadenylation /// mRNA cleavage /// mRNA processing /// embryonic development ending in birth or egg hatching /// body morphogenesis /// growth /// positive regulation of multicellular organism growth	nucleic acid binding /// RNA binding	nucleus /// mRNA cleavage and polyadenylation specificity factor complex	3.03
173035_s_at	nas-9	Nematode AStacin protease	proteolysis /// embryonic development ending in birth or egg hatching	metalloendopeptidase activity /// peptidase activity /// metallopeptidase activity /// zinc ion binding /// hydrolase activity /// metal ion binding	extracellular region	-2.83
173047_s_at		status:Partially_confirmed /// hypothetical protein	GPI anchor biosynthetic process /// metabolic process	catalytic activity /// sulfuric ester hydrolase activity /// transferase activity	endoplasmic reticulum membrane /// integral to membrane	1.81
173053_s_at	man(9)-alpha-mannosidase	man(9)-alpha-mannosidase	---	mannosyl-oligosaccharide 1,2-alpha-mannosidase activity /// calcium ion binding	membrane	1.95
173056_at	T23E7.2	hypothetical protein	---	---	integral to membrane	2.04
173073_s_at	T07D3.9	hypothetical protein	---	---	---	3.41
173079_s_at		status:Partially_confirmed /// hypothetical protein	reproduction /// nematode larval development /// collagen and cuticulin-based cuticle development /// growth /// positive regulation of growth rate /// locomotion /// hermaphrodite genitalia development	---	---	2.53
173083_s_at	H10E21.4	calcium-binding protein	---	calcium ion binding	---	2.56
173088_s_at	twk-5	TWiK family of potassium channels	transport /// ion transport /// potassium ion transport	ion channel activity /// potassium channel activity	membrane /// integral to membrane	-2.32
173090_s_at	clec-65	C-type LECtin /// locus:clec-65	---	binding	---	-2.01
173096_at	K08D12.6	hypothetical protein /// status:Confirmed	---	---	---	2.72
173097_at		status:Partially_confirmed /// hypothetical protein	cation transport	cation transmembrane transporter activity	membrane /// integral to membrane	3.42
173100_s_at	fib-1	FIBrillarin family /// locus:fib-1	reproduction /// nematode larval development /// rRNA processing /// embryonic development ending in birth or egg hatching /// growth /// positive regulation of growth rate /// positive regulation of embryonic development	RNA binding /// methyltransferase activity /// transferase activity	nucleus /// ribonucleoprotein complex	1.95
173109_s_at		status:Partially_confirmed /// hypothetical protein	---	---	---	-2.06
173125_s_at	unc-44	UNCoordinated	carbohydrate metabolic process /// signal transduction /// body morphogenesis /// positive regulation of growth rate /// locomotion /// positive regulation of locomotion /// positive regulation of multicellular organism growth	hydrolase activity, hydrolyzing O-glycosyl compounds /// protein binding /// protein binding	---	2.3
173127_at		status:Confirmed /// hypothetical protein	transport	transporter activity	integral to membrane	-2.24
173133_s_at	cls-2	CLASP family of microtubule-binding proteins /// locus:cls-2	cytokinesis /// morphogenesis of an epithelium /// cell cycle /// mitosis /// meiosis /// embryonic development ending in birth or egg hatching /// cytoplasmic transport /// sister chromatid biorientation /// locomotion /// cell division /// mitotic sister chromatid separation	binding	condensed chromosome kinetochore /// cytoplasm /// centrosome /// spindle /// cytoskeleton /// microtubule	1.93
173134_at	---	---	---	---	---	2.24
173138_s_at	C53B7.3	hypothetical protein	---	---	---	-1.88
173151_s_at	C17C3.1	hypothetical protein	acyl-CoA metabolic process	acyl-CoA thioesterase activity	integral to membrane	1.91
173154_s_at	T26F2.2	hypothetical protein /// status:Partially_confirmed	---	---	---	-5.36
173158_at	W08A12.2	W08A12.2	---	---	integral to membrane	-1.84
173173_at	F54D5.3	F54D5.3	---	---	---	-1.84
173187_s_at	Y51A2D.7	hypothetical protein	reproduction /// nematode larval development /// embryonic development ending in birth or egg hatching /// growth /// positive regulation of growth rate /// locomotion /// hermaphrodite genitalia development	---	---	2.76
173191_at	pri-2	DNA PRImase homolog family member (pri-2) (pri-2)	reproduction /// cytokinesis /// DNA replication, synthesis of RNA primer /// nucleus organization /// embryonic development ending in birth or egg hatching /// hermaphrodite genitalia development /// cell division	DNA primase activity	alpha DNA polymerase:primase complex	1.98
173201_s_at	bath-26	BTB and MATH domain containing /// locus:bath-26	---	protein binding	---	-2.35
173203_at	---	---	---	---	---	2.57
173205_s_at	R06A4.8	Alpha amylase	carbohydrate metabolic process /// glycogen biosynthetic process /// proteolysis /// embryonic development ending in birth or egg hatching	catalytic activity /// 4-alpha-glucanotransferase activity /// amylo-alpha-1,6-glucosidase activity /// cation binding	---	1.85
173209_s_at	C50F4.1	hypothetical protein /// status:Partially_confirmed	---	---	---	-1.91
173214_s_at	phosphotransferaseW10C8.5	phosphotransferase /// ATP transferase	---	catalytic activity /// kinase activity /// transferase activity, transferring phosphorus-containing groups	integral to membrane	2.01
173220_s_at	eif-6	Eukaryotic Initiation Factor /// locus:eif-6	nematode larval development /// translation /// embryonic development ending in birth or egg hatching /// growth /// positive regulation of growth rate /// mature ribosome assembly	translation initiation factor activity /// ribosome binding	---	1.97
173225_at	dao-6	Dauer or Aging adult Overexpression /// ParaQuat (Methylviologen) responsive /// locus:dao-6 /// locus:pqm-96	---	---	integral to membrane	-45.46
173225_at	pqm-96	Dauer or Aging adult Overexpression /// ParaQuat (Methylviologen) responsive /// locus:dao-6 /// locus:pqm-96	---	---	integral to membrane	-45.46
173230_s_at	snf-5	Sodium:Neurotransmitter symporter Family /// locus:snf-5	transport /// neurotransmitter transport	neurotransmitter:sodium symporter activity /// symporter activity	integral to plasma membrane /// membrane /// integral to membrane	2.14
173232_s_at	lmp-2	LAMP (lysosome-associated membrane protein) homolog /// locus:lmp-2	---	---	membrane /// integral to membrane	-1.89
173237_s_at	clp-7	CaLPain family /// locus:clp-7	proteolysis /// cell death	cysteine-type endopeptidase activity /// calcium-dependent cysteine-type endopeptidase activity	intracellular	1.85
173238_s_at	cpt-4	Carnitine Palmitoyl Transferase /// locus:cpt-4	proteolysis	cysteine-type endopeptidase activity /// acyltransferase activity /// transferase activity	---	-3.01
173257_s_at	---	---	---	---	---	-2.76
173272_s_at		status:Partially_confirmed /// hypothetical protein	---	---	---	2.42
173274_s_at	W01F3.2	hypothetical protein /// status:Confirmed	---	catalytic activity /// metal ion binding	---	-2.64
173277_at	---	---	---	---	---	1.97
173289_s_at	mtm-9	MTM (myotubularin) family	endocytosis /// dephosphorylation	phosphatase activity	---	1.93
173296_at	dig-1	DIsplaced Gonad	phosphate metabolic process /// cell adhesion /// multicellular organismal development /// nervous system development /// gonad development /// hermaphrodite genitalia development	magnesium ion binding /// inorganic diphosphatase activity /// copper ion binding /// calcium ion binding /// protein binding /// electron carrier activity	extracellular region /// proteinaceous extracellular matrix /// cytoplasm	6.18
173299_s_at	let-858	LEThal /// locus:let-858	nematode larval development /// mRNA processing /// gastrulation /// RNA splicing /// embryonic development ending in birth or egg hatching /// RNA metabolic process /// molting cycle, collagen and cuticulin-based cuticle /// cell differentiation /// growth /// germ-line stem cell division	RNA binding /// binding /// protein binding /// protein binding	nucleus /// spliceosome	1.94
173301_s_at	gei-7	GEX Interacting protein	glyoxylate cycle /// tricarboxylic acid cycle /// metabolic process /// determination of adult life span /// determination of adult life span /// carboxylic acid metabolic process	catalytic activity /// isocitrate lyase activity /// malate synthase activity /// transferase activity /// lyase activity	---	5.58
173304_at	Y48B6A.6	hypothetical protein	---	calcium ion binding	---	-2.66
173311_s_at	grl-20	GRound-Like (grd related) /// locus:grl-20	---	---	---	-11.83
173312_s_at	K08A2.1	hypothetical protein /// status:Confirmed	---	---	---	-2.34
173317_s_at	pat-4	Paralysed Arrest at Two-fold /// locus:pat-4	reproduction /// nematode larval development /// protein amino acid phosphorylation /// integrin-mediated signaling pathway /// integrin-mediated signaling pathway /// embryonic development /// embryonic development ending in birth or egg hatching /// regulation of signal transduction /// body morphogenesis /// myofibril assembly /// growth /// locomotion	protein kinase activity /// protein serine/threonine kinase activity /// protein tyrosine kinase activity /// integrin binding /// protein binding /// ATP binding /// kinase activity	---	1.82
173326_s_at	Y43F8B.2	hypothetical protein	---	protein binding	---	-2.82
173335_s_at	dod-3	Downstream Of DAF-16 (regulated by DAF-16) /// locus:dod-3	determination of adult life span	---	integral to membrane	-2.26
173356_s_at	sec-23	yeast SEC homolog /// locus:sec-23	reproduction /// nematode larval development /// transport /// intracellular protein transport /// ER to Golgi vesicle-mediated transport /// embryonic development ending in birth or egg hatching /// protein transport /// molting cycle, collagen and cuticulin-based cuticle /// defecation /// positive regulation of growth rate	protein binding /// zinc ion binding	COPII vesicle coat	1.87
173361_s_at	Y105E8A.24	hypothetical protein	reproduction /// regulation of Rho protein signal transduction	Rho guanyl-nucleotide exchange factor activity	intracellular	1.93
173362_s_at	M03C11.2	CHL1 protein	nucleobase, nucleoside, nucleotide and nucleic acid metabolic process /// embryonic development ending in birth or egg hatching	nucleic acid binding /// DNA binding /// ATP-dependent DNA helicase activity /// ATP binding /// ATP-dependent helicase activity /// hydrolase activity, acting on acid anhydrides, in phosphorus-containing anhydrides	nucleus	2.63
173371_s_at	hypothetical protein	coatomer, alpha chain /// hypothetical protein	reproduction /// nematode larval development /// intracellular protein transport /// embryonic development ending in birth or egg hatching /// vesicle-mediated transport /// positive regulation of growth rate /// locomotion	structural molecule activity /// protein binding /// protein binding	membrane coat /// COPI vesicle coat	2.03
173374_s_at	har-1	HemiAsterlin Resistant /// locus:har-1	---	---	---	2.09
173378_at		status:Partially_confirmed /// hypothetical protein	---	binding	---	1.97
173398_s_at	cnc-7	CaeNaCin (Caenorhabditis bacteriocin) /// locus:cnc-7	---	---	integral to membrane	-7.54
173401_s_at	mcm-7	yeast MCM (licensing factor) related /// locus:mcm-7	reproduction /// cytokinesis /// DNA replication initiation /// embryonic development ending in birth or egg hatching /// body morphogenesis /// locomotion /// hermaphrodite genitalia development /// cell division	nucleotide binding /// DNA binding /// ATP binding /// nucleoside-triphosphatase activity	nucleus	1.98
173410_s_at		status:Partially_confirmed /// hypothetical protein	reproduction /// morphogenesis of an epithelium /// nematode larval development /// growth /// positive regulation of growth rate /// locomotion /// positive regulation of multicellular organism growth /// hermaphrodite genitalia development	---	---	2.18
173428_at	lin-59	abnormal cell LINeage	reproduction /// ectodermal cell fate specification /// nematode larval development /// transcription /// regulation of transcription, DNA-dependent /// embryonic development ending in birth or egg hatching /// chromatin modification /// oviposition /// positive regulation of growth rate /// locomotion /// regulation of multicellular organism growth /// tail tip morphogenesis /// positive regulat…	DNA binding /// protein binding /// methyltransferase activity /// zinc ion binding /// transferase activity /// histone-lysine N-methyltransferase activity /// metal ion binding	nucleus	2.24
173445_s_at	lin-36	abnormal cell LINeage /// locus:lin-36	nematode larval development /// multicellular organismal development /// growth /// negative regulation of vulval development /// embryonic digestive tract morphogenesis	nucleic acid binding /// DNA binding /// zinc ion binding /// metal ion binding	intracellular /// nucleus	2.25
173451_s_at	gly-7	GLYcosylation related /// locus:gly-7	---	calcium ion binding /// sugar binding /// transferase activity /// transferase activity, transferring glycosyl groups /// manganese ion binding	Golgi membrane /// Golgi apparatus /// membrane /// integral to membrane	1.99
173466_s_at	flp-9	FMRF-Like Peptide /// locus:flp-9	neuropeptide signaling pathway /// locomotory behavior	---	extracellular region	-2.29
173475_s_at	glb-1	GLoBin /// locus:glb-1	transport /// oxygen transport	oxygen transporter activity /// iron ion binding /// oxygen binding /// heme binding /// metal ion binding	cytoplasm	-2.36
173480_s_at	cyp-32B1	CYtochrome P450 family /// locus:cyp-32B1	---	monooxygenase activity /// iron ion binding /// electron carrier activity /// heme binding	---	-2.38
173489_at	sdz-14	SKN-1 Dependent Zygotic transcript /// locus:sdz-14	---	---	---	-1.88
173501_s_at	M70.4	hypothetical protein /// status:Partially_confirmed	---	---	integral to membrane	2.01
173515_s_at	vrs-2	Valyl tRNA Synthetase /// locus:vrs-2	reproduction /// nematode larval development /// translation /// tRNA aminoacylation for protein translation /// valyl-tRNA aminoacylation /// embryonic development ending in birth or egg hatching /// molting cycle, collagen and cuticulin-based cuticle /// growth /// positive regulation of growth rate /// positive regulation of multicellular organism growth	nucleotide binding /// aminoacyl-tRNA ligase activity /// valine-tRNA ligase activity /// ATP binding /// ligase activity	cytoplasm	2.19
173537_at	B0361.9	hypothetical protein /// status:Confirmed	positive regulation of growth rate	---	---	-2.57
173547_s_at	imp-1	IntraMembrane Protease (IMPAS) family	---	aspartic-type endopeptidase activity /// protein binding	integral to membrane	1.85
173549_s_at	T07F10.6	hypothetical protein /// status:Confirmed	---	---	---	-2
173553_s_at	che-11	abnormal CHEmotaxis /// locus:che-11	hyperosmotic response /// response to oxidative stress /// determination of adult life span /// response to heat /// dauer entry	---	---	1.84
173556_s_at	C06A8.1	hypothetical protein	methionine metabolic process /// positive regulation of growth rate /// oxidation reduction	methylenetetrahydrofolate reductase (NADPH) activity /// protein binding /// oxidoreductase activity	---	2.07
173571_s_at	oac-50	O-ACyltransferase homolog /// locus:oac-50	---	---	integral to membrane	-2.38
173572_s_at	T05H10.3	hypothetical protein /// status:Confirmed	---	protein binding	---	-3.94
173576_at	ZK180.5	hypothetical protein	---	---	---	2.7
173594_at		status:Partially_confirmed /// hypothetical protein	---	---	---	2.18
173609_at		status:Confirmed /// hypothetical protein	---	protein binding	---	3.86
173635_at	dpy-6	DumPY : shorter than wild-type /// locus:dpy-6	body morphogenesis /// positive regulation of multicellular organism growth	---	---	3.35
173648_s_at	tsr-1	Transporter of SR proteins /// locus:tsr-1	embryonic development ending in birth or egg hatching	binding /// protein binding	---	1.93
173655_s_at	rpn-1	proteasome Regulatory Particle, Non-ATPase-like /// locus:rpn-1	reproduction /// nematode larval development /// embryonic development ending in birth or egg hatching /// regulation of protein catabolic process	binding /// enzyme regulator activity	proteasome complex /// cytosol /// protein complex	3.21
173669_s_at	K10B3.6	hypothetical protein	carbohydrate metabolic process /// glycerol metabolic process /// lipid metabolic process	catalytic activity /// phosphoric diester hydrolase activity /// glycerophosphodiester phosphodiesterase activity /// carbohydrate binding	integral to membrane	1.85
173687_s_at	R11A5.3	hypothetical protein /// status:Confirmed	---	---	---	-4.03
173689_s_at	lpd-6	LiPid Depleted /// locus:lpd-6	reproduction /// nematode larval development /// lipid metabolic process /// embryonic development ending in birth or egg hatching /// sequestering of lipid /// growth /// positive regulation of growth rate	---	integral to membrane	2.12
173725_s_at	elo-6	fatty acid ELOngation /// locus:elo-6	positive regulation of growth rate	---	integral to membrane	1.81
173729_at	T22F3.11	hypothetical protein	transport	transporter activity	integral to membrane	104.46
173756_at	T27E4.7	hypothetical protein /// status:Confirmed	---	---	---	-2.6
173757_s_at	T27E4.7	hypothetical protein /// status:Confirmed	---	---	---	-2.94
173760_s_at	lrp-2	Low-density lipoprotein Receptor Related /// locus:lrp-2	cell migration	receptor activity	membrane /// integral to membrane	1.87
173768_at	fut-1	FUcosyl Transferase /// locus:fut-1	protein amino acid glycosylation	fucosyltransferase activity /// transferase activity /// transferase activity, transferring glycosyl groups	Golgi membrane /// membrane /// integral to membrane	-1.82
173769_s_at	---	---	---	---	---	-3.74
173787_at		status:Partially_confirmed /// hypothetical protein	---	---	integral to membrane	-3.39
173818_at	scd-1	Suppressor of Constitutive Dauer formation	positive regulation of growth rate	---	---	2.12
173822_s_at	C08B6.7	59 protein	---	---	---	2.2
173825_at	T21B6.3	f-spondin like protein	---	protein binding	---	2.72
173827_at	unc-68	UNCoordinated /// locus:unc-68	ion transport /// calcium ion transport /// cellular calcium ion homeostasis /// coenzyme A metabolic process /// locomotion /// positive regulation of non-apoptotic programmed cell death	hydroxymethylglutaryl-CoA reductase (NADPH) activity /// ion channel activity /// ryanodine-sensitive calcium-release channel activity /// calcium channel activity /// calcium ion binding /// coenzyme binding	membrane /// integral to membrane	2.86
173828_s_at	unc-68	UNCoordinated /// locus:unc-68	ion transport /// calcium ion transport /// cellular calcium ion homeostasis /// coenzyme A metabolic process /// locomotion /// positive regulation of non-apoptotic programmed cell death	hydroxymethylglutaryl-CoA reductase (NADPH) activity /// ion channel activity /// ryanodine-sensitive calcium-release channel activity /// calcium channel activity /// calcium ion binding /// coenzyme binding	membrane /// integral to membrane	3.67
173840_s_at	clec-13clec-15	C-type LECtin /// C-type LECtin /// locus:clec-13 /// locus:clec-15	positive regulation of growth rate	binding	integral to membrane	-7.94
173841_s_at		EF-hand calcium binding protein /// hypothetical protein	locomotion	calcium ion binding	---	-1.86
173868_s_at	F52A8.5	glycine cleavage system H protein like	glycine catabolic process /// embryonic development ending in birth or egg hatching	---	glycine cleavage complex	-1.84
173897_at	ceh-37	Homeobox /// locus:ceh-37	telomere maintenance /// cell fate specification /// regulation of transcription, DNA-dependent /// regulation of transcription from RNA polymerase II promoter /// multicellular organismal development /// regulation of transcription /// neuron fate specification	DNA binding /// transcription factor activity /// transcription regulator activity /// sequence-specific DNA binding	chromosome, telomeric region /// nucleus /// chromosome	-2.62
173900_s_at	B0331.2	phosphate permease like	phosphate transport	inorganic phosphate transmembrane transporter activity	membrane /// integral to membrane	-2.84
173916_at	F55D12.5	Activin types I and II receptor domain	---	transmembrane receptor protein serine/threonine kinase activity /// transforming growth factor beta receptor activity	membrane	2.22
173938_s_at	gst-20	Glutathione S-Transferase /// locus:gst-20	---	---	---	-3.94
173959_at	skr-21	SKp1 Related (ubiquitin ligase complex component) /// locus:skr-21	ubiquitin-dependent protein catabolic process	protein binding	---	-2.28
174001_s_at	K07H8.10	RNA-binding protein	embryonic development ending in birth or egg hatching /// positive regulation of growth rate	nucleotide binding /// nucleic acid binding	---	1.87
174007_s_at	Monooxygenase	Monooxygenase	metabolic process	monooxygenase activity /// oxidoreductase activity	---	-2.58
174012_s_at	F53B2.8	hypothetical protein /// status:Confirmed	---	---	---	-1.94
174015_at	W02B12.9	mitochondrial RNA splicing MSR4 like protein	transport /// ion transport /// iron ion transport /// embryonic development ending in birth or egg hatching /// positive regulation of growth rate	binding /// iron ion binding	mitochondrion /// mitochondrial inner membrane /// membrane /// integral to membrane	1.87
174031_at	ceh-21	Homeobox /// locus:ceh-21	nematode larval development /// regulation of transcription, DNA-dependent /// embryonic development ending in birth or egg hatching /// regulation of transcription	DNA binding /// transcription factor activity /// sequence-specific DNA binding	nucleus	1.9
174051_s_at	T02B11.3	hypothetical protein	---	---	---	-2.1
174058_s_at	C16C8.19	hypothetical protein /// status:Partially_confirmed	---	---	---	-1.89
174060_at	M02E1.2	hypothetical protein /// status:Confirmed	---	---	integral to membrane	-5.39
174063_at	H12I13.5	hypothetical protein /// status:Confirmed	---	---	---	-2.15
174073_at	---	---	---	---	---	-1.88
174077_at	C05D9.9	hypothetical protein	---	---	---	-2.58
174079_at	C54C8.12	hypothetical protein /// status:Partially_confirmed	---	---	---	-3.02
174086_s_at	T21D12.9	hypothetical protein	reproduction /// positive regulation of multicellular organism growth	protein binding	integral to membrane	2.72
174088_at	C14F11.7	hypothetical protein /// status:Confirmed	---	---	---	-2.54
174089_s_at	hypothetical protein NER	status:Partially_confirmed /// hypothetical protein	nucleotide-excision repair /// embryonic development ending in birth or egg hatching	nucleic acid binding /// DNA binding /// ATP-dependent DNA helicase activity /// helicase activity /// ATP binding /// hydrolase activity	nucleus	1.9
174095_at	C05D11.7	hypothetical protein	lipid metabolic process /// metabolic process /// lipid catabolic process	hydrolase activity	integral to membrane	2.29
174102_at	---	---	---	---	---	-2.62
174104_at	hypothetical protein	status:Confirmed /// hypothetical protein	regulation of transcription, DNA-dependent /// intracellular protein transport /// nucleocytoplasmic transport /// signal transduction /// small GTPase mediated signal transduction /// protein transport	nucleotide binding /// GTPase activity /// protein binding /// ATP binding /// GTP binding /// transcription factor binding	intracellular	-1.94
174111_at	snf-3	Sodium:Neurotransmitter symporter Family /// locus:snf-3	transport /// neurotransmitter transport	neurotransmitter:sodium symporter activity /// symporter activity	integral to plasma membrane /// membrane /// integral to membrane	-1.89
174121_at	---	---	---	---	---	2.1
174122_s_at	alp-1	ALP/Enigma encoding	determination of adult life span /// locomotion /// pharyngeal pumping	protein binding /// protein binding /// zinc ion binding /// identical protein binding	---	2.46
174126_at	cpb-1	CPEB polyA binding family /// locus:cpb-1	regulation of translation /// meiosis /// multicellular organismal development /// spermatogenesis /// spermatogenesis /// cell differentiation	nucleotide binding /// nucleic acid binding /// RNA binding /// mRNA 3'-UTR binding /// protein binding	---	1.87
174149_at	F22E5.17	hypothetical protein /// status:Confirmed	---	protein binding	---	1.93
174162_s_at	hcp-6	HoloCentric chromosome binding Protein	mitotic sister chromatid segregation /// nematode larval development /// mitotic chromosome condensation /// embryonic development ending in birth or egg hatching /// growth /// hermaphrodite genitalia development /// attachment of spindle microtubules to kinetochore during mitosis	binding	---	1.92
174173_at	C53C9.2	hypothetical protein /// status:Confirmed	positive regulation of growth rate	---	---	-2.12
174188_at	npp-7	Nuclear Pore complex Protein /// locus:npp-7	embryonic development ending in birth or egg hatching	zinc ion binding	intracellular	2.11
174192_at	---	---	---	---	---	-2.68
174199_at	F31C3.3	hypothetical protein /// status:Partially_confirmed	carbohydrate metabolic process	hydrolase activity, hydrolyzing O-glycosyl compounds	integral to membrane	2.42
174202_at	flp-19	FMRF-Like Peptide /// locus:flp-19	neuropeptide signaling pathway	---	extracellular region	-5.18
174215_s_at	B0507.8	hypothetical protein /// status:Partially_confirmed	---	---	---	-7.72
174218_at	F11E6.8	Eukaryotic protein kinase domain	protein amino acid phosphorylation	nucleotide binding /// protein kinase activity /// protein serine/threonine kinase activity /// protein tyrosine kinase activity /// ATP binding /// kinase activity /// transferase activity	integral to membrane	-1.8
174228_at	K08C7.4	hypothetical protein /// status:Partially_confirmed	---	---	---	-2.94
174238_at	C18F3.4	C18F3.4	---	---	---	3.48
174247_at	gld-1	defective in Germ Line Development /// locus:gld-1	reproduction /// regulation of translation /// meiosis /// multicellular organismal development /// embryonic development ending in birth or egg hatching /// cell differentiation /// positive regulation of growth rate /// regulation of meiosis /// feminization of hermaphroditic germ-line /// masculinization of hermaphroditic germ-line /// regulation of cell proliferation /// oogenesis /// oogenes…	RNA binding	---	1.88
174248_at	vab-15	Variable ABnormal morphology /// locus:vab-15	reproduction /// transcription /// regulation of transcription, DNA-dependent /// multicellular organismal development /// parturition /// locomotory behavior /// locomotion /// regulation of transcription /// embryonic morphogenesis	DNA binding /// transcription factor activity /// transcription factor activity /// transcription regulator activity /// sequence-specific DNA binding /// sequence-specific DNA binding	nucleus /// nucleus	2.23
174253_at	ntl-4	NOT-Like (yeast CCR4/NOT complex component)	reproduction /// embryonic development ending in birth or egg hatching /// positive regulation of growth rate /// positive regulation of locomotion	nucleotide binding /// nucleic acid binding /// protein binding /// protein binding /// zinc ion binding	---	2.12
174265_at	nlp-9	Neuropeptide-Like Protein	neuropeptide signaling pathway	---	---	-2.58
174274_at	ced-3	CEll Death abnormality /// locus:ced-3	reproduction /// proteolysis /// apoptosis /// cell death /// apoptotic program /// programmed cell death /// regulation of apoptosis	cysteine-type endopeptidase activity /// protein binding /// protein binding /// peptidase activity /// cysteine-type peptidase activity /// hydrolase activity	intracellular	1.88
174286_at	alg-1	Argonaute (plant)-Like Gene	nematode larval development /// nematode larval development /// determination of adult life span /// embryonic development /// molting cycle, collagen and cuticulin-based cuticle /// positive regulation of growth rate /// locomotion /// positive regulation of locomotion /// positive regulation of multicellular organism growth /// vulval development /// hermaphrodite genitalia development	nucleic acid binding	---	1.83
174298_s_at	pyp-1	inorganic PYroPhosphatase	reproduction /// nematode larval development /// phosphate metabolic process /// embryonic development ending in birth or egg hatching /// growth /// positive regulation of growth rate	magnesium ion binding /// inorganic diphosphatase activity /// hydrolase activity /// metal ion binding	cytoplasm /// integral to membrane	2.35
174308_at		status:Partially_confirmed /// hypothetical protein	---	---	integral to membrane	1.81
174315_at		status:Partially_confirmed /// hypothetical protein	---	---	integral to membrane	-5.64
174323_at	ceh-39	Homeobox /// locus:ceh-39	regulation of transcription, DNA-dependent /// regulation of transcription	DNA binding /// transcription factor activity /// sequence-specific DNA binding	nucleus	3.63
174331_at	rgs-6	Regulator of G protein Signaling /// locus:rgs-6	negative regulation of signal transduction	signal transducer activity	---	2.71
174337_at	nac-3	NADC (Na+-coupled dicarboxylate transporter) family	transport /// ion transport /// sodium ion transport /// determination of adult life span	transporter activity /// symporter activity /// sodium ion binding	membrane /// integral to membrane	2.24
174340_at		status:Partially_confirmed /// hypothetical protein	cell wall modification	pectinesterase activity	cell wall	-3.11
174345_at	ttn-1	TiTiN family	protein amino acid phosphorylation /// regulation of Rho protein signal transduction	nucleotide binding /// protein kinase activity /// protein serine/threonine kinase activity /// protein tyrosine kinase activity /// Rho guanyl-nucleotide exchange factor activity /// structural constituent of cell wall /// ATP binding /// kinase activity /// transferase activity	intracellular	2.23
174351_at	grl-25	GRound-Like (grd related) /// locus:grl-25	---	---	integral to membrane	-18.75
174354_at	ifg-1	Initiation Factor 4G (eIF4G) family	reproduction /// nematode larval development /// determination of adult life span /// embryonic development ending in birth or egg hatching /// body morphogenesis /// RNA metabolic process /// growth /// positive regulation of growth rate	binding /// protein binding	---	2.87
174355_at	clec-219	C-type LECtin /// locus:clec-219	embryonic development ending in birth or egg hatching	sugar binding	---	-12.96
174360_at	cutl-16	CUTiclin-Like /// locus:cutl-16	---	---	integral to membrane	-1.89
174362_at	---	---	---	---	---	1.9
174371_at	dpy-31	DumPY : shorter than wild-type	proteolysis /// embryonic development ending in birth or egg hatching	metalloendopeptidase activity /// peptidase activity /// metallopeptidase activity /// zinc ion binding /// hydrolase activity /// metal ion binding	extracellular region	-1.99
174386_at	nex-2	anNEXin family	---	calcium ion binding /// calcium-dependent phospholipid binding	---	-1.81
174390_s_at	W09C5.7	hypothetical protein /// status:Partially_confirmed	---	---	---	1.88
174392_at	pqn-45	Prion-like-(Q/N-rich)-domain-bearing protein /// locus:pqn-45	reproduction /// embryonic development ending in birth or egg hatching	---	---	1.93
174393_at	---	---	---	---	---	-2.6
174394_at	---	---	---	---	---	1.82
174414_at	---	---	---	---	---	1.98
174420_at	F29C6.1	hypothetical protein	reproduction	---	---	-2.71
174437_at	F10E9.12	F10E9.12	cellular amine metabolic process	copper ion binding /// amine oxidase activity /// quinone binding	---	-2.61
174445_at	Y48G1C.5	status:Partially_confirmed /// hypothetical protein	translation /// protein amino acid dephosphorylation /// dephosphorylation	structural constituent of ribosome /// protein tyrosine phosphatase activity /// phosphatase activity	intracellular /// ribosome /// integral to membrane	1.8
174459_at	grl-25	GRound-Like (grd related) /// locus:grl-25	---	---	integral to membrane	-11.08
174487_s_at	C41G7.3	hypothetical protein /// status:Partially_confirmed	meiotic chromosome segregation	RNA binding	---	2.26
174489_at	anc-1	abnormal nuclear ANChorage /// locus:anc-1	nematode larval development /// cytoskeleton organization /// embryonic development ending in birth or egg hatching /// molting cycle, collagen and cuticulin-based cuticle /// growth /// positive regulation of growth rate /// localization	actin binding	nucleus /// nuclear outer membrane /// cytoplasm /// cytoskeleton /// membrane /// integral to membrane	2.16
174492_at	unc-89	UNCoordinated	carbohydrate metabolic process /// protein amino acid phosphorylation /// regulation of Rho protein signal transduction /// locomotion	protein kinase activity /// protein serine/threonine kinase activity /// protein tyrosine kinase activity /// vascular endothelial growth factor receptor activity /// Rho guanyl-nucleotide exchange factor activity /// ATP binding /// kinase activity /// transferase activity	intracellular	2.7
174505_at	T28C6.8	hypothetical protein /// status:Confirmed	---	---	integral to membrane	-1.96
174508_s_at	K08E7.5	hypothetical protein	---	protein binding	---	2.52
174510_at	---	---	---	---	---	1.84
174513_at	---	---	---	---	---	-1.86
174536_s_at	clec-136	C-type LECtin /// locus:clec-136	---	---	---	-7.13
174538_at		status:Partially_confirmed /// hypothetical protein	---	---	---	1.97
174548_at	ifc-2	Intermediate Filament, C	morphogenesis of an epithelium /// determination of adult life span /// body morphogenesis /// molting cycle, collagen and cuticulin-based cuticle /// collagen and cuticulin-based cuticle development /// positive regulation of growth rate /// locomotion /// positive regulation of multicellular organism growth	structural molecule activity /// protein binding	cytoplasm /// intermediate filament	2.2
174569_at	---	---	---	---	---	-5.26
174584_s_at	miz-1	MIZ-type zinc finger transcription factor /// locus:miz-1	nematode larval development	zinc ion binding	---	1.95
174599_at	R11A8.7	hypothetical protein	---	RNA binding	cytoplasm	1.98
174601_s_at		status:Confirmed /// hypothetical protein	nematode larval development /// embryonic development ending in birth or egg hatching /// growth /// positive regulation of growth rate /// ribosome biogenesis	---	nucleus	2.36
174633_at	ketn-1	KETtiN (Drosophila actin-binding) homolog	positive regulation of growth rate	---	---	2.55
174669_s_at	atf-6	ATF (cAMP-dependent transciption factor) family /// locus:atf-6	regulation of transcription, DNA-dependent	transcription factor activity /// protein binding /// sequence-specific DNA binding /// protein dimerization activity	nucleus	-1.88
174675_at	acs-2	fatty Acid CoA Synthetase family /// locus:acs-2	metabolic process	catalytic activity	---	6.81
174686_at	unc-89	UNCoordinated	carbohydrate metabolic process /// protein amino acid phosphorylation /// regulation of Rho protein signal transduction /// locomotion	protein kinase activity /// protein serine/threonine kinase activity /// protein tyrosine kinase activity /// vascular endothelial growth factor receptor activity /// Rho guanyl-nucleotide exchange factor activity /// ATP binding /// kinase activity /// transferase activity	intracellular	2.1
174696_s_at	clec-208	C-type LECtin /// locus:clec-208	reproduction	binding	---	-5.98
174713_at	mrp-5	Multidrug Resistance Protein family	nematode larval development /// transport /// collagen and cuticulin-based cuticle development /// positive regulation of growth rate /// positive regulation of locomotion	nucleotide binding /// ATP binding /// ATPase activity /// nucleoside-triphosphatase activity /// ATPase activity, coupled to transmembrane movement of substances	integral to membrane	1.93
174716_at	B0222.10	hypothetical protein /// status:Partially_confirmed	translation	structural constituent of ribosome	intracellular /// ribosome /// integral to membrane	-4.11
174745_at	sym-2	SYnthetic lethal with Mec /// locus:sym-2	embryonic development ending in birth or egg hatching /// embryonic development ending in birth or egg hatching /// embryonic body morphogenesis /// multicellular organismal movement	nucleotide binding /// nucleic acid binding	---	-1.86
174762_at	B0280.1	hypothetical protein	reproduction /// cell death /// embryonic development ending in birth or egg hatching	catalytic activity /// prenyltransferase activity /// Rab-protein geranylgeranyltransferase activity /// zinc ion binding /// transferase activity /// metal ion binding	---	2.3
174785_at	unc-52	UNCoordinated	nematode larval development /// cell adhesion /// epidermal growth factor receptor signaling pathway /// muscle development /// determination of adult life span /// embryonic development ending in birth or egg hatching /// embryonic development ending in birth or egg hatching /// cell migration /// molting cycle, collagen and cuticulin-based cuticle /// myofibril assembly /// positive regulation …	calcium ion binding	extracellular region /// proteinaceous extracellular matrix /// proteinaceous extracellular matrix /// basement membrane /// extracellular matrix	2.03
174796_at	fasn-1	Fatty Acid SyNthase /// locus:fasn-1	nematode larval development /// metabolic process /// biosynthetic process /// embryonic development ending in birth or egg hatching /// growth /// oxidation reduction	acyl carrier activity /// catalytic activity /// binding /// zinc ion binding /// oxidoreductase activity /// transferase activity /// hydrolase activity, acting on ester bonds /// cofactor binding	---	2.09
174812_at	---	---	reproduction /// one-carbon compound metabolic process /// positive regulation of growth rate /// locomotion /// negative regulation of multicellular organism growth /// positive regulation of multicellular organism growth	nucleotide binding /// magnesium ion binding /// methionine adenosyltransferase activity /// ATP binding /// transferase activity /// potassium ion binding /// metal ion binding /// cobalt ion binding	---	1.97
174819_at	unc-2	UNCoordinated	regulation of neurotransmitter levels /// DNA methylation /// transport /// ion transport /// calcium ion transport /// locomotory behavior /// response to heat /// negative regulation of transforming growth factor beta receptor signaling pathway /// locomotion /// response to starvation	DNA binding /// ion channel activity /// voltage-gated calcium channel activity /// calcium ion binding /// N-methyltransferase activity	voltage-gated calcium channel complex /// membrane /// integral to membrane	2.63
174824_at	tag-308	Temporarily Assigned Gene name	---	---	---	-1.99
174828_at	cgh-1	Conserved Germline Helicase /// locus:cgh-1	reproduction /// morphogenesis of an epithelium /// nematode larval development /// apoptosis /// anti-apoptosis /// multicellular organismal development /// gamete generation /// spermatogenesis /// determination of adult life span /// embryonic development ending in birth or egg hatching /// mRNA metabolic process /// cell differentiation /// growth /// positive regulation of growth rate /// he…	nucleotide binding /// nucleic acid binding /// RNA binding /// helicase activity /// protein binding /// ATP binding /// ATP-dependent helicase activity /// hydrolase activity	cytoplasm	1.8
174837_s_at	F21C10.7	hypothetical protein /// status:Partially_confirmed	---	---	---	2.07
174853_at	tlk-1	Tousled-Like Kinase	transcription /// regulation of transcription, DNA-dependent /// regulation of transcription from RNA polymerase II promoter /// protein amino acid phosphorylation /// protein amino acid phosphorylation /// multicellular organismal development /// embryonic development ending in birth or egg hatching /// positive regulation of multicellular organism growth /// protein amino acid autophosphorylati…	nucleotide binding /// protein kinase activity /// protein kinase activity /// protein serine/threonine kinase activity /// protein serine/threonine kinase activity /// protein tyrosine kinase activity /// ATP binding /// ATP binding /// kinase activity /// transferase activity	nucleus /// nucleus	1.89
174874_at	clu-1	yeast CLU (mitochondrial clustering) related /// locus:clu-1	translation /// embryonic development ending in birth or egg hatching	translation initiation factor activity	---	1.86
174892_at	lin-66	abnormal cell LINeage /// locus:lin-66	nematode larval development /// locomotion /// positive regulation of locomotion /// hermaphrodite genitalia development	protein binding	---	2.84
174911_at	unc-22	UNCoordinated	translation /// tRNA aminoacylation for protein translation /// protein amino acid phosphorylation /// locomotion	nucleotide binding /// protein kinase activity /// protein serine/threonine kinase activity /// protein tyrosine kinase activity /// aminoacyl-tRNA ligase activity /// ATP binding /// kinase activity /// transferase activity	cytoplasm	4.83
174915_s_at	K07C5.4	yeast protein L8167.9-like	reproduction /// nematode larval development /// embryonic development ending in birth or egg hatching /// growth /// positive regulation of growth rate /// positive regulation of multicellular organism growth /// hermaphrodite genitalia development	---	---	3.17
174923_at	ntl-4	NOT-Like (yeast CCR4/NOT complex component)	reproduction /// embryonic development ending in birth or egg hatching /// positive regulation of growth rate /// positive regulation of locomotion	nucleotide binding /// nucleic acid binding /// protein binding /// protein binding /// zinc ion binding	---	1.81
174939_s_at	lst-3	Lateral Signaling Target	positive regulation of growth rate /// locomotion /// positive regulation of locomotion	nucleic acid binding /// calcium ion binding /// protein binding	---	2.26
174941_s_at	Y105E8A.23	hypothetical protein	reproduction /// transcription /// positive regulation of growth rate	DNA binding /// DNA-directed RNA polymerase activity	---	1.87
174962_at		status:Confirmed /// hypothetical protein	---	protein binding	---	-2.06
174977_at	let-363	LEThal	reproduction /// nematode larval development /// regulation of translation /// regulation of translation /// determination of adult life span /// embryonic development ending in birth or egg hatching /// growth /// positive regulation of growth rate	binding /// kinase activity /// transferase activity /// transferase activity, transferring phosphorus-containing groups /// phosphotransferase activity, alcohol group as acceptor	nucleus	1.82
174992_at		zinc finger protein /// hypothetical protein	reproduction /// morphogenesis of an epithelium /// nematode larval development /// regulation of transcription, DNA-dependent /// positive regulation of growth rate /// locomotion /// hermaphrodite genitalia development /// regulation of transcription	nucleic acid binding /// DNA binding /// transcription factor activity /// zinc ion binding /// transcription regulator activity /// sequence-specific DNA binding /// metal ion binding	intracellular /// nucleus	1.92
174994_at	osm-11	OSMotic avoidance abnormal /// locus:osm-11	morphogenesis of an epithelium /// nematode larval development /// growth /// positive regulation of growth rate /// locomotion /// positive regulation of multicellular organism growth /// negative regulation of vulval development /// hermaphrodite genitalia development	---	---	-2.41
175024_s_at	clec-161	C-type LECtin /// locus:clec-161	---	binding /// sugar binding	extracellular region	-3.64
175032_at	mbk-2	MiniBrain Kinase (Drosophila) homolog	reproduction /// cytokinesis after mitosis /// cytokinesis /// morphogenesis of an epithelium /// protein amino acid phosphorylation /// microtubule-based process /// mitotic spindle organization /// embryonic development ending in birth or egg hatching /// embryonic pattern specification /// body morphogenesis /// pronuclear migration /// asymmetric protein localization during cell fate commitme…	protein kinase activity /// protein serine/threonine kinase activity /// protein tyrosine kinase activity /// ATP binding /// kinase activity	---	1.85
175077_s_at	C05D12.3	hypothetical protein	---	---	---	1.81
175095_at	B0410.3	hypothetical protein /// status:Confirmed	---	---	integral to membrane	-3.26
175096_at	spp-15	SaPosin-like Protein family /// locus:spp-15	lipid metabolic process	---	---	-3.26
175103_s_at	C34B7.1	hypothetical protein /// status:Partially_confirmed	---	---	---	-2.18
175104_s_at	F08D12.3	hypothetical protein	---	protein binding	---	-2.83
175112_s_at		status:Confirmed /// hypothetical protein	---	---	---	-2.05
175113_at		status:Confirmed /// hypothetical protein	---	---	---	-3.04
175118_s_at	cct-2	Chaperonin Containing TCP-1 /// locus:cct-2	reproduction /// nematode larval development /// protein folding /// embryonic development ending in birth or egg hatching /// growth /// hermaphrodite genitalia development /// cellular protein metabolic process	nucleotide binding /// protein binding /// ATP binding /// unfolded protein binding	cytoplasm	2.08
175126_s_at	K08D8.5	hypothetical protein /// status:Confirmed	---	---	---	2.06
175134_at	cutl-29	CUTiclin-Like /// locus:cutl-29	---	---	integral to membrane	2.45
175145_s_at	C34E10.11	hypothetical protein /// status:Partially_confirmed	embryonic development ending in birth or egg hatching	---	---	1.82
175151_at	F53C11.1	hypothetical protein /// status:Confirmed	---	---	---	-2.53
175157_s_at	kin-33	protein KINase	protein amino acid phosphorylation	protein kinase activity /// protein serine/threonine kinase activity /// protein tyrosine kinase activity /// ATP binding /// kinase activity	---	2.09
175162_s_at	C08F1.10	hypothetical protein /// status:Confirmed	---	---	integral to membrane	-2.27
175163_at	prk-2	Pim (mammalian oncogene) Related Kinase /// locus:prk-2	protein amino acid phosphorylation	protein kinase activity /// protein serine/threonine kinase activity /// protein tyrosine kinase activity /// ATP binding	---	-2.45
175166_at	flp-8	FMRF-Like Peptide	neuropeptide signaling pathway	---	---	-5.72
175167_at	C40A11.6	hypothetical protein /// status:Partially_confirmed	potassium ion transport	voltage-gated potassium channel activity /// protein binding	voltage-gated potassium channel complex /// membrane	-2.23
175175_at	F10E9.12	hypothetical protein /// status:Confirmed	cellular amine metabolic process	copper ion binding /// amine oxidase activity /// quinone binding	---	-2.33
175186_at	C27A7.3	hypothetical protein	metabolic process	catalytic activity /// hydrolase activity	membrane /// integral to membrane	-1.8
175193_at	T25F10.3	hypothetical protein /// status:Confirmed	---	---	integral to membrane	-1.81
175194_at	ugt-45	UDP-GlucuronosylTransferase /// locus:ugt-45	metabolic process	transferase activity /// transferase activity, transferring glycosyl groups /// transferase activity, transferring hexosyl groups	integral to membrane	2.11
175195_at	---	---	---	---	---	-2.52
175197_at	grk-1	G-protein-coupled Receptor Kinase /// locus:grk-1	protein amino acid phosphorylation /// signal transduction	nucleotide binding /// protein kinase activity /// protein serine/threonine kinase activity /// G-protein coupled receptor kinase activity /// protein tyrosine kinase activity /// signal transducer activity /// ATP binding /// kinase activity /// transferase activity	---	1.83
175212_at	clec-82	C-type LECtin	---	binding /// sugar binding	---	-3.3
175218_at	F59C12.4	hypothetical protein /// status:Confirmed	---	---	---	-2.11
175221_at	dyc-1	DYstrophin-like phenotype and CAPON related	positive regulation of locomotion /// regulation of oviposition /// muscle maintenance	protein binding /// protein binding /// nitric-oxide synthase regulator activity	dystrophin-associated glycoprotein complex	2.35
175239_at	F15E11.15	hypothetical protein	positive regulation of growth rate	---	---	2.39
175243_at	cmd-1	CalModulin /// locus:cmd-1	reproduction /// embryonic development /// embryonic development ending in birth or egg hatching /// cell migration /// positive regulation of growth rate /// regulation of apoptosis /// apoptotic cell clearance /// regulation of cell cycle	calcium ion binding /// protein binding	---	1.84
175253_s_at	C01B4.7	hypothetical protein /// status:Predicted /// status:Predicted /// hypothetical protein	transport	transporter activity	integral to membrane	1.85
175257_s_at	T05C3.6	hypothetical protein	metabolic process	catalytic activity	integral to membrane	-2.01
175267_at	C15H9.11	hypothetical protein /// status:Confirmed	---	---	---	-3.31
175268_at	esterase	esterase	metabolic process	carboxylesterase activity /// hydrolase activity	integral to membrane	1.84
175278_at	---	---	---	---	---	-3.33
175279_s_at	sek-1	SAPK/ERK kinase /// locus:sek-1	protein amino acid phosphorylation /// defense response /// oviposition /// innate immune response	protein kinase activity /// protein serine/threonine kinase activity /// protein tyrosine kinase activity /// protein binding /// ATP binding /// kinase activity	---	-1.93
175284_at	F07A5.4	hypothetical protein /// status:Partially_confirmed	---	---	---	2.12
175285_at	F53C3.3	hypothetical protein /// status:Confirmed	---	---	integral to membrane	-1.83
175286_at	---	---	---	---	---	-1.93
175289_at	flp-22	FMRF-Like Peptide /// locus:flp-22	neuropeptide signaling pathway	---	---	-2.59
175291_at	vab-10	Variable ABnormal morphology	reproduction /// gastrulation with mouth forming first /// morphogenesis of an epithelium /// nematode larval development /// cell cycle arrest /// embryonic development /// embryonic development ending in birth or egg hatching /// body morphogenesis /// growth /// positive regulation of growth rate /// locomotion /// hermaphrodite genitalia development	actin binding	---	1.96
175307_s_at	W01B11.6	hypothetical protein	cell redox homeostasis	---	---	-2.17
175311_s_at	btb-17	BTB (Broad/complex/Tramtrack/Bric a brac) domain protein /// locus:btb-17	---	protein binding	---	-3.1
175367_s_at	Y110A2AL.4	hypothetical protein	positive regulation of growth rate	---	---	-2
175398_s_at	dhs-4	DeHydrogenases, Short chain /// locus:dhs-4	metabolic process /// enterobactin biosynthetic process	catalytic activity /// binding /// 2,3-dihydro-2,3-dihydroxybenzoate dehydrogenase activity /// oxidoreductase activity	---	-1.86
175411_at	---	---	---	---	---	-3.06
175415_s_at	T21C9.3	hypothetical protein	sodium ion transport	sodium channel activity	membrane /// integral to membrane	-2.2
175432_at	---	---	---	---	---	-1.97
175453_at	syn-2	SYNtaxin /// locus:syn-2	transport /// neurotransmitter transport /// intracellular protein transport /// synaptic vesicle docking during exocytosis /// vesicle-mediated transport	SNAP receptor activity /// protein binding	membrane /// integral to membrane	-2.45
175456_at	W05H9.4	hypothetical protein /// status:Partially_confirmed	---	---	---	2.04
175462_s_at	gem-4	Gon-2 Extragenic Modifier /// locus:gem-4	---	---	---	-2.03
175480_at	---	---	---	---	---	-2.27
175489_at	F18E3.11	hypothetical protein /// status:Confirmed	---	---	---	-7.14
175508_at	T04B2.5	hypothetical protein /// status:Confirmed	lipid metabolic process /// metabolic process	hydrolase activity	---	-2.4
175512_s_at	C12C8.2	hypothetical protein	amino acid metabolic process	catalytic activity /// pyridoxal phosphate binding	---	-2.3
175521_at	Y105E8A.20	Y105E8A.20	reproduction /// translation /// tRNA aminoacylation for protein translation /// methionyl-tRNA aminoacylation /// embryonic development ending in birth or egg hatching	nucleotide binding /// aminoacyl-tRNA ligase activity /// methionine-tRNA ligase activity /// ATP binding	cytoplasm	1.84
175529_s_at	gur-3	GUstatory Receptor family /// locus:gur-3	sensory perception of taste	receptor activity	integral to membrane	1.87
175538_at	C06B8.2	hypothetical protein	---	catalytic activity /// metal ion binding	integral to membrane	2.88
175539_s_at	K06A5.8	hypothetical protein	---	protein binding	---	1.98
175546_at	R06C1.6	hypothetical protein /// status:Partially_confirmed	---	---	---	-2.37
175550_at	tpxl-1	TPX2 (Targeting Protein for Xenopus Klp2)-Like	reproduction /// nematode larval development /// mitotic spindle organization /// embryonic development ending in birth or egg hatching	protein binding	---	2.09
175553_at	K02G10.3	hypothetical protein /// status:Confirmed	---	---	integral to membrane	2.57
175554_s_at	K02G10.3	hypothetical protein /// status:Confirmed	---	---	integral to membrane	3.18
175555_s_at	ctg-2	CRAL/TRIO and GOLD domain containing /// locus:ctg-2	---	---	---	-1.84
175560_at	F59E11.7	F59E11.7	---	---	integral to membrane	-2.91
175583_s_at	B0001.5	hypothetical protein /// status:Partially_confirmed	---	---	---	1.87
175584_s_at	K05F1.5	hypothetical protein /// status:Partially_confirmed	---	zinc ion binding	intracellular	2.36
175620_at	par-2	abnormal embryonic PARtitioning of cytoplasm	reproduction /// establishment of mitotic spindle orientation /// morphogenesis of an epithelium /// nematode larval development /// asymmetric cell division /// embryonic development ending in birth or egg hatching /// positive regulation of growth rate /// negative regulation of vulval development /// hermaphrodite genitalia development /// asymmetric protein localization during cell fate commi…	protein binding /// zinc ion binding	---	2.08
175628_at	eat-4	EATing: abnormal pharyngeal pumping /// locus:eat-4	reproduction /// transport /// ion transport /// sodium ion transport /// neurotransmitter transport /// regulation of pharyngeal pumping	transporter activity /// symporter activity /// sodium ion binding	plasma membrane /// membrane /// integral to membrane /// cell junction /// synapse	2.15
175642_s_at	abf-2	AntiBacterial Factor related /// locus:abf-2	---	---	---	-10.07
175660_at	ptl-1	Protein with Tau-Like repeats	negative regulation of microtubule depolymerization	protein binding	---	2.57
175666_s_at	bli-4	BLIstered cuticle	nematode larval development /// proteolysis /// protein-based cuticle development /// embryonic development /// embryonic development ending in birth or egg hatching /// body morphogenesis /// molting cycle, collagen and cuticulin-based cuticle /// collagen and cuticulin-based cuticle development /// growth /// locomotion	serine-type endopeptidase activity /// serine-type endopeptidase activity /// calcium ion binding /// protein binding /// peptidase activity /// serine-type peptidase activity /// hydrolase activity	membrane /// integral to membrane /// integral to membrane	-1.93
175677_s_at	lin-41	abnormal cell LINeage	reproduction /// morphogenesis of an epithelium /// multicellular organismal development /// gamete generation /// determination of adult life span /// body morphogenesis /// oviposition /// molting cycle, collagen and cuticulin-based cuticle /// locomotion /// positive regulation of multicellular organism growth /// negative regulation of vulval development /// regulation of development, heteroc…	protein binding /// zinc ion binding /// metal ion binding	intracellular /// cytoplasm	2.38
175686_s_at	unc-70	UNCoordinated	nematode larval development /// embryonic body morphogenesis /// dendrite development /// positive regulation of growth rate /// locomotion /// regulation of locomotion /// positive regulation of locomotion /// muscle maintenance /// neuron development	actin binding /// structural constituent of cytoskeleton	spectrin	1.88
175687_at	mai-1	Mitochondrial ATPase Inhibitor family /// locus:mai-1	negative regulation of nucleotide metabolic process	enzyme inhibitor activity	mitochondrion	-2.48
175692_s_at	vab-3	Variable ABnormal morphology	nematode larval development /// transcription /// regulation of transcription, DNA-dependent /// multicellular organismal development /// anterior/posterior pattern formation /// regulation of cell adhesion /// dauer entry /// tail tip morphogenesis /// cell fate commitment /// regulation of transcription /// positive regulation of transcription from RNA polymerase II promoter	DNA binding /// transcription factor activity /// protein binding /// transcription regulator activity /// sequence-specific DNA binding	nucleus	-2.56
175696_s_at	zfp-1	Zinc finger protein (CEZF)	embryonic development ending in birth or egg hatching /// RNA interference /// hermaphrodite genitalia development	DNA binding /// protein binding /// zinc ion binding /// metal ion binding	nucleus /// integral to membrane	1.85
175700_s_at	abts-1	Anion/Bicarbonate TranSporter family	transport /// anion transport	transporter activity /// inorganic anion exchanger activity /// anion transmembrane transporter activity /// anion exchanger activity	membrane /// integral to membrane	2.08
175705_s_at	lec-11	gaLECtin	---	sugar binding	---	-2.65
175744_s_at	uaf-1	U2AF splicing factor	reproduction /// nematode larval development /// mRNA processing /// RNA splicing /// embryonic development /// embryonic development ending in birth or egg hatching /// growth /// hermaphrodite genitalia development	nucleotide binding /// nucleic acid binding /// RNA binding /// protein binding	nucleus	1.85
175745_at	ins-1	INSulin related /// locus:ins-1	learning or memory /// negative regulation of insulin receptor signaling pathway /// negative regulation of insulin receptor signaling pathway /// regulation of chemotaxis	hormone activity	extracellular region	-2.42
175753_at	exos-4.1	EXOSome (multiexonuclease complex) component	nematode larval development /// rRNA processing /// RNA processing /// protein targeting to mitochondrion /// transport /// tRNA processing /// gonad development /// embryonic development ending in birth or egg hatching /// body morphogenesis /// protein transport /// growth /// positive regulation of growth rate /// positive regulation of multicellular organism growth /// protein import into mit…	tRNA binding /// 3'-5'-exoribonuclease activity /// RNA binding /// nuclease activity /// exonuclease activity /// tRNA-specific ribonuclease activity /// zinc ion binding /// hydrolase activity /// metal ion binding	exosome (RNase complex) /// nucleus /// cytoplasm /// mitochondrion /// mitochondrial inner membrane /// membrane /// mitochondrial intermembrane space protein transporter complex	1.86
175754_s_at	exos-4.1	EXOSome (multiexonuclease complex) component	nematode larval development /// rRNA processing /// RNA processing /// protein targeting to mitochondrion /// transport /// tRNA processing /// gonad development /// embryonic development ending in birth or egg hatching /// body morphogenesis /// protein transport /// growth /// positive regulation of growth rate /// positive regulation of multicellular organism growth /// protein import into mit…	tRNA binding /// 3'-5'-exoribonuclease activity /// RNA binding /// nuclease activity /// exonuclease activity /// tRNA-specific ribonuclease activity /// zinc ion binding /// hydrolase activity /// metal ion binding	exosome (RNase complex) /// nucleus /// cytoplasm /// mitochondrion /// mitochondrial inner membrane /// membrane /// mitochondrial intermembrane space protein transporter complex	1.81
175771_at	nob-1	kNOB-like posterior (NO Backside)	regulation of transcription, DNA-dependent /// embryonic development ending in birth or egg hatching /// embryonic pattern specification /// anterior/posterior pattern formation /// body morphogenesis /// embryonic body morphogenesis /// positive regulation of growth rate /// tail tip morphogenesis /// regulation of transcription	DNA binding /// transcription factor activity /// protein binding /// transcription regulator activity /// sequence-specific DNA binding	nucleus	-1.86
175772_s_at	ser-4	SERotonin/octopamine receptor family /// locus:ser-4	signal transduction /// G-protein coupled receptor protein signaling pathway /// negative regulation of locomotion	signal transducer activity /// receptor activity /// G-protein coupled receptor activity	plasma membrane /// membrane /// integral to membrane	-1.93
175777_at	flp-2	FMRF-Like Peptide	nematode larval development /// embryonic development ending in birth or egg hatching /// growth /// positive regulation of growth rate	---	integral to membrane	-3.73
175778_s_at	flp-2	FMRF-Like Peptide	nematode larval development /// embryonic development ending in birth or egg hatching /// growth /// positive regulation of growth rate	---	integral to membrane	-2.04
175779_at	pkc-2	Protein Kinase C	protein amino acid phosphorylation /// intracellular signaling cascade	nucleotide binding /// protein kinase activity /// protein serine/threonine kinase activity /// protein kinase C activity /// protein tyrosine kinase activity /// ATP binding /// zinc ion binding /// kinase activity /// transferase activity /// diacylglycerol binding /// metal ion binding	integral to membrane	-1.82
175786_at	cki-1	CKI family (Cyclin-dependent Kinase Inhibitor) /// locus:cki-1	nematode larval development /// ubiquitin-dependent protein catabolic process /// cell cycle /// cell cycle arrest /// gonad development /// embryonic development ending in birth or egg hatching /// body morphogenesis /// oviposition /// growth /// positive regulation of growth rate /// locomotion /// negative regulation of multicellular organism growth /// hermaphrodite genitalia development ///…	protein kinase inhibitor activity /// cyclin-dependent protein kinase inhibitor activity	nucleus	-1.95
175815_at	Y34F4.2	hypothetical protein	---	---	integral to membrane	-7.82
175831_s_at	nhr-23	Nuclear Hormone Receptor family	reproduction /// nematode larval development /// transcription /// regulation of transcription, DNA-dependent /// body morphogenesis /// oviposition /// molting cycle, collagen and cuticulin-based cuticle /// growth /// locomotion /// positive regulation of multicellular organism growth	DNA binding /// transcription factor activity /// steroid hormone receptor activity /// receptor activity /// ligand-dependent nuclear receptor activity /// zinc ion binding /// sequence-specific DNA binding /// metal ion binding	nucleus	2.13
175870_s_at		status:Partially_confirmed /// hypothetical protein	---	---	---	-2.38
175871_at	---	---	---	---	---	-5.7
175872_at	clec-150	C-type LECtin /// locus:clec-150	---	binding	---	-1.94
175873_at	Y34F4.1	hypothetical protein	---	---	integral to membrane	-2.06
175898_at		status:Partially_confirmed /// hypothetical protein	---	---	---	-2.15
175915_at	F41B4.2	hypothetical protein	oviposition	---	---	-4.08
175918_at	F41B4.3	hypothetical protein /// status:Confirmed	---	---	integral to membrane	-2.6
175953_at	F41G4.8	hypothetical protein /// status:Partially_confirmed	---	---	---	-3.23
175981_at	ZK370.4	hypothetical protein	lipid metabolic process /// metabolic process /// phosphatidylcholine metabolic process	lysophospholipase activity	endoplasmic reticulum membrane /// integral to membrane	2.86
175983_at	T05A8.7	hypothetical protein /// status:Predicted	---	---	integral to membrane	-1.81
175990_at	ttr-32	TransThyretin-Related family domain /// locus:ttr-32	negative regulation of locomotion	---	---	-2.07
175993_at	gsto-1	Glutathione S-Transferase, Omega class /// locus:gsto-1	morphogenesis of an epithelium /// metabolic process /// embryonic development ending in birth or egg hatching /// oviposition /// positive regulation of growth rate /// locomotion /// hermaphrodite genitalia development	glutathione transferase activity /// transferase activity	cytoplasm	2.81
175995_at	pcp-1	Prolyl Carboxy Peptidase like /// locus:pcp-1	proteolysis	peptidase activity /// serine-type peptidase activity /// hydrolase activity	---	-2.11
176013_s_at	ppgn-1	ParaPleGiN AAA protease family /// locus:ppgn-1 /// status:Predicted /// status:Predicted /// hypothetical protein /// hypothetical protein	proteolysis /// protein catabolic process	nucleotide binding /// metalloendopeptidase activity /// ATP binding /// peptidase activity /// zinc ion binding /// nucleoside-triphosphatase activity	membrane /// integral to membrane	1.87
176015_at		status:Partially_confirmed /// hypothetical protein	---	---	---	2.23
176018_s_at	kle-2	KLEisin (abnormal closure) family /// locus:kle-2	morphogenesis of an epithelium /// embryonic development ending in birth or egg hatching /// hermaphrodite genitalia development	---	nucleus	1.91
176021_at	ekl-4	Enhancer of Ksr-1 Lethality	reproduction /// gastrulation with mouth forming first /// embryonic development /// embryonic development ending in birth or egg hatching /// negative regulation of transcription /// positive regulation of growth rate /// locomotion /// hermaphrodite genitalia development	DNA binding	nucleus	2.43
176032_s_at	C06E1.9	hypothetical protein /// status:Confirmed	---	---	---	2.2
176081_at		status:Partially_confirmed /// hypothetical protein	reproduction	---	integral to membrane	-2.2
176082_s_at		status:Partially_confirmed /// hypothetical protein	reproduction	---	integral to membrane	-1.84
176091_s_at	prp-8	yeast PRP (splicing factor) related /// locus:prp-8	reproduction /// nuclear mRNA splicing, via spliceosome /// nematode larval development /// mRNA processing /// RNA splicing /// embryonic development ending in birth or egg hatching /// molting cycle, collagen and cuticulin-based cuticle /// growth /// locomotion /// hermaphrodite genitalia development	RNA binding	nucleus /// spliceosome	2.56
176095_at	F09G8.3	hypothetical protein /// status:Confirmed	nematode larval development /// translation /// embryonic development ending in birth or egg hatching /// growth /// positive regulation of growth rate /// hermaphrodite genitalia development	structural constituent of ribosome	intracellular /// mitochondrion /// ribosome /// ribonucleoprotein complex	1.83
176118_at	ttr-8	TransThyretin-Related family domain /// locus:ttr-8	---	---	---	-1.93
176133_at	fbxa-63	F-box A protein /// locus:fbxa-63	---	---	---	-2.42
176135_s_at	fbxa-92	F-box A protein /// locus:fbxa-91 /// locus:fbxa-92	---	---	---	-1.89
176145_at	K08D12.3	hypothetical protein	reproduction /// nematode larval development /// embryonic development ending in birth or egg hatching /// growth /// locomotion	nucleic acid binding /// zinc ion binding	---	-2.09
176160_at	F09G8.10	hypothetical protein /// status:Confirmed	---	---	---	-2.2
176169_at	fbxa-80	F-box A protein /// locus:fbxa-80	---	---	---	-2.39
176183_at		status:Predicted /// hypothetical protein	---	---	---	-4.78
176184_at		status:Partially_confirmed /// hypothetical protein	metabolic process	oxidoreductase activity	---	2.47
176209_at		status:Predicted /// hypothetical protein	---	---	integral to membrane	-3.19
176212_at	fbxa-151	F-box A protein /// F-box A protein /// locus:fbxa-151 /// locus:fbxa-78	---	---	---	-7.47
176212_at	fbxa-78	F-box A protein /// F-box A protein /// locus:fbxa-151 /// locus:fbxa-78	---	---	---	-7.47
176240_s_at	tufm-1	TU elongation Factor (EF-Tu), Mitochondrial /// locus:tufm-1	reproduction /// nematode larval development /// translational elongation /// embryonic development ending in birth or egg hatching /// growth	translation elongation factor activity /// GTPase activity /// GTP binding	intracellular	2.4
176246_at		status:Partially_confirmed /// hypothetical protein	---	---	---	-2.44
176256_s_at		status:Partially_confirmed /// hypothetical protein	---	zinc ion binding	---	-3.21
176259_at		status:Partially_confirmed /// hypothetical protein	---	---	---	1.8
176260_at		status:Partially_confirmed /// hypothetical protein	copper ion transport	copper ion transmembrane transporter activity	integral to membrane	-3.03
176289_s_at	set-2	SET (trithorax/polycomb) domain containing	positive regulation of growth rate	nucleotide binding /// nucleic acid binding /// RNA binding	nucleus	2.71
176309_at	Y105E8A.23	hypothetical protein	reproduction /// transcription /// positive regulation of growth rate	DNA binding /// DNA-directed RNA polymerase activity	---	2.38
176347_at		status:Confirmed /// hypothetical protein	---	---	integral to membrane	-2.26
176356_s_at	mppa-1	Mitochondrial Processing Peptidase Alpha /// locus:mppa-1	proteolysis	catalytic activity /// metalloendopeptidase activity /// zinc ion binding /// metal ion binding	---	4.19
176361_at	CE7X_3.1	hypothetical protein /// status:Predicted /// status:Confirmed /// status:Partially_confirmed /// hypothetical protein /// hypothetical protein	positive regulation of multicellular organism growth	---	integral to membrane	1.93
176362_s_at	T23E7.2	hypothetical protein	---	---	integral to membrane	2.19
176373_at	---	---	---	---	---	1.85
176384_at	H05L03.3	hypothetical protein /// status:Confirmed	---	---	---	-4.87
176385_at	eri-5	Enhanced RNAI (RNA interference) /// locus:eri-5	---	---	---	2.17
176388_at	ppgn-1	ParaPleGiN AAA protease family /// locus:ppgn-1	proteolysis /// protein catabolic process	nucleotide binding /// metalloendopeptidase activity /// ATP binding /// peptidase activity /// zinc ion binding /// nucleoside-triphosphatase activity	membrane /// integral to membrane	2.46
176389_s_at	ppgn-1	ParaPleGiN AAA protease family /// locus:ppgn-1 /// status:Partially_confirmed /// hypothetical protein	proteolysis /// protein catabolic process	nucleotide binding /// metalloendopeptidase activity /// ATP binding /// peptidase activity /// zinc ion binding /// nucleoside-triphosphatase activity	membrane /// integral to membrane	2.94
176401_s_at		status:Partially_confirmed /// hypothetical protein	---	---	integral to membrane	-2.46
176405_at	bath-40	BTB and MATH domain containing /// locus:bath-40	ubiquitin-dependent protein catabolic process	protein binding /// protein binding	---	2.1
176415_at	hypothetical protein	status:Partially_confirmed /// hypothetical protein	nematode larval development /// growth /// positive regulation of growth rate	nucleic acid binding /// helicase activity /// ATP binding /// ATP-dependent helicase activity	---	2.01
176427_s_at	exoc-8	EXOCyst component	reproduction /// nematode larval development /// embryonic development ending in birth or egg hatching /// body morphogenesis /// growth /// positive regulation of growth rate /// locomotion /// positive regulation of multicellular organism growth	---	---	1.9
176432_at		status:Confirmed /// hypothetical protein	regulation of transcription, DNA-dependent	---	nucleus	-2.24
176437_at	C30F12.3	hypothetical protein /// status:Partially_confirmed	---	---	integral to membrane	-3.72
176447_at	---	---	---	---	---	-2.18
176453_at	ugt-31	UDP-GlucuronosylTransferase /// locus:ugt-31	metabolic process	transferase activity /// transferase activity, transferring glycosyl groups /// transferase activity, transferring hexosyl groups	integral to membrane	4.13
176459_at		status:Confirmed /// hypothetical protein	---	---	---	-1.98
176479_at		status:Partially_confirmed /// hypothetical protein	---	---	integral to membrane	2.07
176482_at		status:Partially_confirmed /// hypothetical protein	reproduction /// nematode larval development /// embryonic development ending in birth or egg hatching /// body morphogenesis /// growth /// positive regulation of growth rate /// locomotion /// positive regulation of multicellular organism growth	---	---	1.81
176489_at	pqn-85	Prion-like-(Q/N-rich)-domain-bearing protein /// locus:pqn-85	cell cycle /// embryonic development ending in birth or egg hatching /// body morphogenesis /// locomotion	binding	nucleus	2.29
176491_at	eif-3.I	Eukaryotic Initiation Factor /// locus:eif-3.I	reproduction /// embryonic development ending in birth or egg hatching	translation initiation factor activity	---	3.49
176492_s_at	eif-3.I	Eukaryotic Initiation Factor /// locus:eif-3.I	reproduction /// embryonic development ending in birth or egg hatching	translation initiation factor activity	---	3.89
176503_at	nhr-239	Nuclear Hormone Receptor family /// locus:nhr-239	regulation of transcription, DNA-dependent	DNA binding /// transcription factor activity /// ligand-dependent nuclear receptor activity /// zinc ion binding /// sequence-specific DNA binding	nucleus	-2.09
176506_s_at		status:Partially_confirmed /// hypothetical protein	---	---	integral to membrane	-1.84
176520_at	mtm-9	MTM (myotubularin) family	endocytosis /// dephosphorylation	phosphatase activity	---	2.35
176542_at		status:Partially_confirmed /// hypothetical protein	---	---	integral to membrane	-6.34
176547_at		status:Predicted /// hypothetical protein	---	---	integral to membrane	-2.75
176549_at		status:Partially_confirmed /// hypothetical protein	reproduction /// transport /// embryonic development ending in birth or egg hatching	---	intracellular	2.19
176555_at		status:Confirmed /// hypothetical protein	---	---	integral to membrane	-2.34
176564_at		status:Confirmed /// hypothetical protein	metabolic process /// embryonic development ending in birth or egg hatching /// cellular metabolic process	catalytic activity /// binding /// coenzyme binding	---	-2
176573_s_at	mec-4	MEChanosensory abnormality /// locus:mec-4	transport /// ion transport /// sodium ion transport /// mechanosensory behavior /// cell death /// response to mechanical stimulus /// regulation of non-apoptotic programmed cell death	ion channel activity /// sodium channel activity /// sodium ion binding	membrane /// integral to membrane	1.81
176574_at	rfs-1	Rad-51 (Fifty one) like, Short /// locus:rfs-1	meiotic chromosome segregation	---	---	2.07
176585_at		status:Confirmed /// hypothetical protein	---	---	membrane /// integral to membrane	-2.04
176586_s_at	helicase	helicase	reproduction /// morphogenesis of an epithelium /// nematode larval development /// embryonic development ending in birth or egg hatching /// growth /// positive regulation of growth rate /// locomotion /// positive regulation of multicellular organism growth /// hermaphrodite genitalia development	nucleic acid binding /// helicase activity /// ATP binding /// ATP-dependent helicase activity	---	2.23
176607_s_at	Msi3p	Msi3p	reproduction /// morphogenesis of an epithelium /// nematode larval development /// embryonic development ending in birth or egg hatching /// body morphogenesis /// growth /// positive regulation of growth rate /// locomotion /// hermaphrodite genitalia development	nucleotide binding /// ATP binding	---	2.73
176608_s_at	zfp-1	Zinc Finger Protein	embryonic development ending in birth or egg hatching /// RNA interference /// hermaphrodite genitalia development	DNA binding /// protein binding /// zinc ion binding /// metal ion binding	nucleus /// integral to membrane	2.09
176622_s_at	fem-1	FEMinization of XX and XO animals	reproduction /// ubiquitin-dependent protein catabolic process /// multicellular organismal development /// positive regulation of growth rate	protein binding	cytoplasm	1.86
176632_s_at	egl-45	EGg Laying defective /// locus:egl-45	reproduction /// nematode larval development /// translation /// embryonic development /// embryonic development ending in birth or egg hatching /// body morphogenesis /// oviposition /// growth /// positive regulation of locomotion	translation initiation factor activity	---	1.97
176647_s_at	afd-1	AFaDin (actin filament binding protein) homolog	signal transduction /// positive regulation of growth rate	protein binding /// protein binding	---	2.45
176657_at	cit-1.2	CyclIn T	transcription /// regulation of transcription, DNA-dependent	---	---	-1.98
176661_at	---	---	---	---	---	-4.09
176665_s_at	hypothetical protein	status:Partially_confirmed /// hypothetical protein	nematode larval development /// embryonic development ending in birth or egg hatching /// growth	nucleic acid binding /// helicase activity /// ATP binding /// ATP-dependent helicase activity	---	-1.85
176675_at	F43H9.4	hypothetical protein /// status:Confirmed	---	---	---	-3.33
176676_s_at	T22F3.3	hypothetical protein	cytokinesis /// carbohydrate metabolic process /// embryonic development ending in birth or egg hatching /// cell division	phosphorylase activity /// pyridoxal phosphate binding	---	2.27
176692_s_at	C45B2.8	hypothetical protein /// status:Partially_confirmed	---	---	---	-2.1
176696_at		status:Partially_confirmed /// hypothetical protein	tRNA processing /// RNA metabolic process	ribonuclease P activity /// ribonuclease activity	nucleus	-1.97
176704_at		status:Partially_confirmed /// hypothetical protein	reproduction /// regulation of transcription, DNA-dependent /// hermaphrodite genitalia development /// regulation of transcription	DNA binding /// transcription factor activity /// sequence-specific DNA binding	nucleus	1.86
176712_at	K06H7.8	hypothetical protein /// status:Partially_confirmed	protein amino acid phosphorylation	nucleotide binding /// protein kinase activity /// protein serine/threonine kinase activity /// ATP binding /// kinase activity /// transferase activity	---	1.82
176714_at	R13D7.2	hypothetical protein /// status:Confirmed	---	---	---	-2
176722_at	let-526	LEThal	reproduction /// gastrulation with mouth forming first /// morphogenesis of an epithelium /// nematode larval development /// embryonic development /// embryonic development ending in birth or egg hatching /// body morphogenesis /// oviposition /// positive regulation of growth rate /// hermaphrodite genitalia development	DNA binding	intracellular	1.97
176740_at	M04F3.2	hypothetical protein /// status:Partially_confirmed	---	---	---	2.22
176758_at		status:Partially_confirmed /// hypothetical protein	---	---	---	-1.96
176775_at	K02G10.3	hypothetical protein /// status:Confirmed	---	---	integral to membrane	2.99
176778_s_at	rrf-2	RNA-dependent RNA polymerase Family /// locus:rrf-2	---	---	---	-1.8
176781_at	C46C11.2	hypothetical protein	---	---	integral to membrane	2.01
176803_at	C03B1.14	hypothetical protein /// status:Partially_confirmed	---	---	---	-2.59
176806_at	F45E4.3	hypothetical protein	---	protein binding	---	2.14
176811_s_at	H31G24.3	BTB (also known as BR-C/Ttk) domain. /// status:Partially_confirmed /// hypothetical protein	embryonic development ending in birth or egg hatching	protein binding	---	1.95
176831_at	srsx-6	Serpentine Receptor, class SX /// locus:srsx-6	---	receptor activity	integral to membrane	-1.84
176846_at		status:Partially_confirmed /// hypothetical protein	---	---	integral to membrane	-2.1
176847_at		status:Partially_confirmed /// hypothetical protein	GPI anchor biosynthetic process /// metabolic process	catalytic activity /// sulfuric ester hydrolase activity /// transferase activity	endoplasmic reticulum membrane /// integral to membrane	2.6
176852_at	srsx-5	Serpentine Receptor, class SX /// locus:srsx-5	---	receptor activity	integral to membrane	-1.84
176871_at	T08B2.5	hypothetical protein	reproduction	nucleotide binding /// nucleic acid binding /// protein binding /// zinc ion binding	intracellular	2.77
176890_at		status:Predicted /// hypothetical protein	---	---	integral to membrane	-2.21
176914_s_at	F29B9.2	hypothetical protein	embryonic development ending in birth or egg hatching	protein binding /// zinc ion binding /// metal ion binding	---	1.82
176921_at		status:Partially_confirmed /// hypothetical protein	nematode larval development /// embryonic development ending in birth or egg hatching /// growth	---	---	1.86
176930_at	spd-1	SPindle Defective /// locus:spd-1	reproduction /// morphogenesis of an epithelium /// cytokinesis, completion of separation /// gonad development /// embryonic development ending in birth or egg hatching /// body morphogenesis /// oviposition /// positive regulation of growth rate /// locomotion /// regulation of multicellular organism growth /// negative regulation of multicellular organism growth /// positive regulation of loco…	---	---	1.85
176932_at		status:Partially_confirmed /// hypothetical protein	locomotion	---	---	2.02
176933_at		status:Partially_confirmed /// hypothetical protein	---	---	---	-1.84
176939_at	spp-23	SaPosin-like Protein family /// locus:spp-23	---	---	---	2.49
176955_at	ech-7	Enoyl-CoA Hydratase /// locus:ech-7	metabolic process	catalytic activity	---	2.67
176959_at	Y105E8A.10	hypothetical protein	sphingolipid metabolic process /// glucosylceramide catabolic process	catalytic activity /// glucosylceramidase activity	membrane /// integral to membrane	2.3
176961_at	eat-18	EATing: abnormal pharyngeal pumping	synaptic transmission /// regulation of pharyngeal pumping	---	integral to membrane	2.36
176973_s_at	M7.9	hypothetical protein /// status:Partially_confirmed	---	---	---	-17.64
176975_s_at		status:Partially_confirmed /// hypothetical protein	reproduction /// nematode larval development /// collagen and cuticulin-based cuticle development /// growth /// positive regulation of growth rate /// locomotion /// hermaphrodite genitalia development	---	---	1.8
176981_s_at		locus:xpo-2 /// eXPOrtin (nuclear export receptor)	reproduction /// protein import into nucleus, docking /// nematode larval development /// intracellular protein transport /// cell proliferation /// embryonic development ending in birth or egg hatching /// growth /// positive regulation of growth rate /// locomotion /// hermaphrodite genitalia development	binding /// importin-alpha export receptor activity /// protein transporter activity	nucleus /// nuclear pore /// cytoplasm	2.61
176985_at	eel-1	Enhancer of EfL-1 mutant phenotype /// locus:eel-1	nematode larval development /// protein modification process /// ubiquitin-dependent protein catabolic process /// embryonic development ending in birth or egg hatching	acid-amino acid ligase activity	intracellular	2.77
176988_at		status:Partially_confirmed /// hypothetical protein	---	---	---	2.01
176994_at	---	---	---	---	---	-1.81
177020_at		status:Confirmed /// hypothetical protein	---	---	integral to membrane	-2.24
177024_at	col-90	COLlagen /// locus:col-90	body morphogenesis	structural constituent of cuticle	integral to membrane	2.19
177025_at	mbtr-1	MBT (Malignant Brain Tumor) Repeat containing protein	regulation of transcription	---	nucleus	2.08
177029_at	kbp-4	KNL (kinetochore null) Binding Protein /// locus:kbp-4	reproduction /// nematode larval development /// embryonic development ending in birth or egg hatching /// growth /// hermaphrodite genitalia development	---	---	-1.82
177031_at	---	---	---	---	---	3.46
177034_s_at	uaf-1	U2AF splicing factor	reproduction /// nematode larval development /// mRNA processing /// RNA splicing /// embryonic development /// embryonic development ending in birth or egg hatching /// growth /// hermaphrodite genitalia development	nucleotide binding /// nucleic acid binding /// RNA binding /// protein binding	nucleus	1.87
177036_at	lad-2	L1 CAM ADhesion molecule homolog	dorsal/ventral axon guidance /// anterior/posterior axon guidance	---	integral to membrane	1.96
177046_s_at		status:Partially_confirmed /// hypothetical protein	---	protein binding /// protein binding	---	1.93
177051_at	mif-4	MIF (macrophage migration inhibitory factor) related /// locus:mif-4	---	---	---	2.25
177059_at	clec-72	C-type LECtin /// locus:clec-72	---	binding /// sugar binding	---	-1.81
177060_s_at	clec-72	C-type LECtin /// locus:clec-72	---	binding /// sugar binding	---	-2.53
177063_at		status:Partially_confirmed /// hypothetical protein	---	---	---	-2.15
177065_at	vit-1	VITellogenin structural genes (yolk protein genes) /// locus:vit-1	lipid transport	lipid transporter activity /// nutrient reservoir activity	extracellular region	3.66
177066_at		status:Confirmed /// status:Confirmed /// hypothetical protein /// hypothetical protein	---	---	---	-3.07
177067_s_at		status:Confirmed /// hypothetical protein	---	---	---	-3.02
177081_at		status:Partially_confirmed /// hypothetical protein	reproduction /// positive regulation of growth rate /// locomotion	nucleic acid binding /// helicase activity /// ATP binding /// ATP-dependent helicase activity	---	2.88
177087_at		status:Predicted /// hypothetical protein	---	---	membrane	-1.88
177096_at	cogc-3	Conserved Oligomeric Golgi (COG) Component	morphogenesis of an epithelium /// nematode larval development /// intracellular protein transport /// embryonic development ending in birth or egg hatching /// regulation of cell migration /// gonad morphogenesis /// growth /// locomotion /// positive regulation of multicellular organism growth /// hermaphrodite genitalia development	---	cis-Golgi network /// membrane	1.95
177104_at	clec-70	C-type LECtin /// locus:clec-70	---	binding /// sugar binding	---	-1.96
177105_s_at	unc-84	UNCoordinated	nuclear migration /// multicellular organismal development /// nervous system development /// post-embryonic development /// embryonic development ending in birth or egg hatching /// oviposition /// regulation of cell migration /// locomotion /// vulval development	protein binding	nucleus /// nuclear inner membrane /// cytoplasm /// cytoskeleton /// membrane /// integral to membrane	2.12
177116_at	M7.12	hypothetical protein /// status:Partially_confirmed	---	---	---	2.09
177122_at	hcp-6	HoloCentric chromosome binding Protein	mitotic sister chromatid segregation /// nematode larval development /// mitotic chromosome condensation /// embryonic development ending in birth or egg hatching /// growth /// hermaphrodite genitalia development /// attachment of spindle microtubules to kinetochore during mitosis	binding	---	2.07
177140_s_at	dcr-1	DiCer Related /// locus:dcr-1	morphogenesis of an epithelium /// nematode larval development /// RNA processing /// defense response /// RNA interference /// oviposition /// gene silencing by RNA /// positive regulation of growth rate /// locomotion /// hermaphrodite genitalia development	nucleotide binding /// nucleic acid binding /// DNA binding /// RNA binding /// double-stranded RNA binding /// helicase activity /// nuclease activity /// endonuclease activity /// ribonuclease III activity /// protein binding /// ATP binding /// hydrolase activity	intracellular	2.23
177157_at	R53.8	hypothetical protein /// status:Partially_confirmed	---	---	integral to membrane	-2.81
177159_at		status:Partially_confirmed /// hypothetical protein	proteolysis /// cellular process	metalloexopeptidase activity	---	2.95
177161_at	R11.2	hypothetical protein /// status:Partially_confirmed	---	---	---	-1.9
177167_at		status:Partially_confirmed /// hypothetical protein	---	---	---	-1.83
177170_at	ifc-2	Intermediate Filament, C	morphogenesis of an epithelium /// determination of adult life span /// body morphogenesis /// molting cycle, collagen and cuticulin-based cuticle /// collagen and cuticulin-based cuticle development /// positive regulation of growth rate /// locomotion /// positive regulation of multicellular organism growth	structural molecule activity /// protein binding	cytoplasm /// intermediate filament	-2.82
177183_s_at		locus:acp-6 /// hypothetical protein	---	acid phosphatase activity	---	2.26
177207_at		status:Predicted /// hypothetical protein	nematode larval development	---	integral to membrane	-2.46
177228_at	Y61A9LA.11	hypothetical protein	---	---	---	1.91
177235_s_at	DH11.2	hypothetical protein /// status:Partially_confirmed	---	---	---	1.85
177257_at	clec-258	C-type LECtin /// locus:clec-258	---	binding	---	-2.6
177258_at	srt-45	Serpentine Receptor, class T /// locus:srt-45	---	---	integral to membrane	-1.84
177270_at	JC8.12	hypothetical protein	G-protein coupled receptor protein signaling pathway	---	integral to membrane	-2.48
177274_s_at	pro-1	PROximal proliferation in germline /// locus:pro-1	reproduction /// nematode larval development /// rRNA processing /// rRNA processing /// rRNA processing /// multicellular organismal development /// germ cell development /// gonadal mesoderm development /// gonad development /// cell migration /// growth /// positive regulation of growth rate /// hermaphrodite genitalia development /// ribosome biogenesis	---	nucleus	1.87
177290_at		status:Partially_confirmed /// hypothetical protein	---	lipid binding	---	-2.09
177342_at		status:Partially_confirmed /// hypothetical protein	neuropeptide signaling pathway	---	membrane /// integral to membrane	-1.88
177344_at	map-1	Methionine AminoPeptidase /// locus:map-1	proteolysis /// cellular process	aminopeptidase activity /// metalloexopeptidase activity	---	2.57
177350_at	M176.11	hypothetical protein /// status:Partially_confirmed	---	---	integral to membrane	-2.22
177353_s_at	clec-190	C-type LECtin /// locus:clec-190	---	binding	---	15.87
177365_at	R102.2	hypothetical protein /// status:Confirmed	---	---	---	-2.05
177373_s_at	JC8.11T23B5.1	hypothetical protein /// hypothetical protein	---	---	---	1.98
177378_at	math-36	MATH (meprin-associated Traf homology) domain containing /// locus:math-36	---	---	---	-1.81
177390_at		status:Predicted /// hypothetical protein	---	---	integral to membrane	-4.21
177393_at	F58G1.1	hypothetical protein /// status:Partially_confirmed	---	nucleic acid binding	---	3.69
177405_at	F35E2.2	hypothetical protein /// status:Partially_confirmed	---	---	---	-2.09
177410_at	C01A2.2	hypothetical protein	---	---	integral to membrane	-2.13
177413_s_at	snt-1	SyNapTotagmin	transport /// locomotory behavior /// defecation /// regulation of pharyngeal pumping /// regulation of pharyngeal pumping /// regulation of neurotransmitter secretion	transporter activity /// calcium ion binding /// metal ion binding	synaptic vesicle /// membrane /// integral to membrane /// cell junction /// cytoplasmic vesicle /// synapse	-1.83
177414_at	F58D5.5	hypothetical protein /// status:Partially_confirmed	---	---	---	-1.94
177415_s_at	B0546.5F16D3.6F35E2.1	hypothetical protein /// hypothetical protein /// hypothetical protein /// status:Partially_confirmed /// status:Predicted /// status:Partially_confirmed	---	---	integral to membrane	-1.91
177416_at	sru-40	Serpentine Receptor, class U /// locus:sru-40	---	---	integral to membrane	-5.4
177420_s_at	K09E4.2	hypothetical protein /// status:Partially_confirmed	---	mannosyltransferase activity /// transferase activity, transferring hexosyl groups	endoplasmic reticulum /// integral to membrane	2.05
177428_at	F58G6.3F58G6.7	hypothetical protein /// hypothetical protein /// status:Predicted /// status:Confirmed	copper ion transport	copper ion transmembrane transporter activity	integral to membrane	3.5
177431_at	C53C7.5	miscRNA	---	---	---	-1.93
177437_at	K02E2.7	hypothetical protein /// status:Partially_confirmed	---	---	---	-2.11
177444_at	T01B7.6	hypothetical protein /// status:Partially_confirmed	reproduction /// embryonic development ending in birth or egg hatching	---	---	1.84
177478_at	D1086.2	hypothetical protein	---	---	---	-2.54
177485_s_at	man(9)-alpha-mannosidase	man(9)-alpha-mannosidase	---	mannosyl-oligosaccharide 1,2-alpha-mannosidase activity /// calcium ion binding	membrane	1.84
177487_at	C29F3.7	hypothetical protein	positive regulation of growth rate	---	---	-2
177496_at	D1086.1	hypothetical protein /// status:Confirmed	---	---	---	-5.33
177532_at	F22B5.4	hypothetical protein /// status:Confirmed	---	---	integral to membrane	-2.17
177544_at	F58E6.7	hypothetical protein /// status:Confirmed	---	---	integral to membrane	7.06
177555_at	F09B9.4	hypothetical protein /// status:Confirmed	---	---	---	-2.17
177559_at	srz-104	Serpentine Receptor, class Z /// locus:srz-104	---	---	integral to membrane	-2.09
177564_at	F02E9.9	hypothetical protein	proteolysis	dipeptidyl-peptidase activity	cytoplasm	2.2
177579_at	K03D3.5	hypothetical protein /// status:Partially_confirmed	---	---	---	-16.45
177582_s_at	rsd-2	RNAi Spreading Defective (see also sid)	---	---	---	1.9
177618_at	srh-120	Serpentine Receptor, class H /// locus:srh-120	---	---	integral to membrane	-1.87
177620_s_at	T24D1.3	hypothetical protein /// status:Confirmed	embryonic development ending in birth or egg hatching	protein binding /// zinc ion binding	---	1.94
177622_at	hcp-2	HoloCentric chromosome binding Protein /// locus:hcp-2	protein localization /// embryonic development ending in birth or egg hatching /// meiotic chromosome segregation /// mitotic sister chromatid separation	protein binding	---	2.58
177627_at	F10A3.1	hypothetical protein /// status:Partially_confirmed	---	---	integral to membrane	-1.88
177629_at		status:Partially_confirmed /// hypothetical protein	---	---	integral to membrane	-3.02
177640_at	F58D5.3	hypothetical protein /// status:Confirmed	---	---	integral to membrane	-2.59
177641_at	F36G9.7	hypothetical protein /// status:Predicted	---	---	integral to membrane	-4.89
177647_s_at	T06E4.8	hypothetical protein /// status:Partially_confirmed	---	---	integral to membrane	-2
177665_at		status:Partially_confirmed /// hypothetical protein	---	protein binding	---	-1.89
177670_at	ttr-48	TransThyretin-Related family domain /// locus:ttr-48	---	---	---	-2.08
177672_at	T23F6.5	hypothetical protein /// status:Partially_confirmed	---	---	---	-2.46
177680_at		status:Partially_confirmed /// hypothetical protein	---	---	---	2.5
177681_s_at		status:Partially_confirmed /// hypothetical protein	---	---	---	2.08
177686_at	nlp-18	Neuropeptide-Like Protein /// locus:nlp-18	---	---	integral to membrane	-1.86
177690_at		status:Partially_confirmed /// hypothetical protein	---	---	---	-4.3
177720_at	T24D5.5	hypothetical protein /// status:Predicted	---	---	---	-1.98
177722_at	---	---	---	---	---	-1.96
177726_at	K01G5.9	hypothetical protein /// status:Confirmed	---	hydrolase activity	---	1.81
177728_at	C26C6.4	hypothetical protein	---	---	integral to membrane	-2.16
177735_at	F02H6.2	hypothetical protein /// status:Partially_confirmed	---	---	---	2.11
177745_s_at	C28A5.2	hypothetical protein /// status:Partially_confirmed	---	---	---	2.06
177747_at	F58G6.9srm-3	srm-3	copper ion transport	copper ion transmembrane transporter activity	integral to membrane	4.62
177748_s_at	F54F7.3	hypothetical protein /// status:Confirmed	---	---	---	-2.1
177764_at	T11B7.2	hypothetical protein /// status:Partially_confirmed	---	---	---	-3.01
177766_at	F15D3.8	hypothetical protein /// status:Partially_confirmed	---	---	---	-2.25
177770_s_at	spd-2	SPindle Defective /// locus:spd-2	reproduction /// microtubule cytoskeleton organization /// nematode larval development /// cell cycle /// mitotic spindle organization /// centrosome cycle /// centriole replication /// multicellular organismal development /// embryonic development ending in birth or egg hatching /// growth /// positive regulation of growth rate /// vulval development	protein binding	---	1.85
177774_at	F31C3.2	hypothetical protein	meiotic chromosome segregation	protein binding	---	1.93
177777_at	C04G2.9	hypothetical protein /// status:Confirmed	---	---	---	1.93
177784_at	F07C6.3	hypothetical protein /// status:Partially_confirmed	---	---	---	-2.27
177799_at		status:Confirmed /// hypothetical protein	---	protein binding	---	-2.44
177800_s_at	T04D3.1	hypothetical protein /// status:Partially_confirmed	---	---	---	1.84
177801_at	clec-230	C-type LECtin /// locus:clec-230	---	binding	---	2.38
177808_at	R11H6.4	hypothetical protein /// status:Confirmed	---	---	---	-3.55
177810_s_at	F28D1.2	hypothetical protein /// status:Confirmed	embryonic development ending in birth or egg hatching	protein binding	---	-2.26
177814_s_at	T11B7.5	hypothetical protein /// status:Confirmed	---	---	---	-3.09
177815_s_at	E01G4.3	hypothetical protein /// status:Confirmed	---	---	---	-2.02
177816_at	F49H6.3	hypothetical protein /// status:Predicted	---	---	integral to membrane	-4.92
177817_at	W01F3.2	hypothetical protein /// status:Confirmed	---	catalytic activity /// metal ion binding	---	-2.44
177828_at	F02H6.4	hypothetical protein /// status:Predicted	---	---	---	2.48
177834_s_at	patr-1	yeast PAT1(protein associated with topo II) Related /// locus:patr-1	nematode larval development /// embryonic development ending in birth or egg hatching /// growth	---	---	2.04
177860_at	sri-6	Serpentine Receptor, class I /// locus:sri-6	---	---	integral to membrane	-2.57
177882_at	F22B5.6	hypothetical protein /// status:Predicted	---	---	integral to membrane	-2.3
177899_at	T03D8.7	hypothetical protein /// status:Partially_confirmed	---	---	---	-2.58
177902_s_at	pqn-39	Prion-like-(Q/N-rich)-domain-bearing protein /// locus:pqn-39	---	---	integral to membrane	1.88
177903_s_at	oac-14	O-ACyltransferase homolog /// locus:oac-14	positive regulation of growth rate	transferase activity, transferring acyl groups other than amino-acyl groups	integral to membrane	6.15
177907_at	C36E8.4	hypothetical protein /// status:Partially_confirmed	embryonic development ending in birth or egg hatching	---	---	-2.36
177920_at	D1086.3	hypothetical protein /// status:Confirmed	---	---	---	-3.15
177930_at		status:Predicted /// hypothetical protein	---	---	---	-2.86
177937_s_at	cids-2	pol II C-terminal Interaction Domain Suppressor	meiotic chromosome segregation	protein binding	---	1.93
177951_s_at	PDB1.1	hypothetical protein	cation transport	cation transmembrane transporter activity	membrane /// integral to membrane	-2.04
177952_s_at	K02E2.6	hypothetical protein /// status:Confirmed	proteolysis	aspartic-type endopeptidase activity	---	-2.88
177958_at	F36D1.7	hypothetical protein /// status:Confirmed	---	---	---	-2.84
177959_at	C36B1.6	hypothetical protein	embryonic development ending in birth or egg hatching	---	integral to membrane	-2.17
177961_at	F54F7.2	hypothetical protein /// status:Partially_confirmed	---	---	---	-2.67
177973_at	F58G1.1	hypothetical protein	---	---	---	3.64
177974_s_at	F58G1.1	hypothetical protein /// status:Partially_confirmed	---	nucleic acid binding	---	3.36
177994_at	F10B5.8	hypothetical protein /// status:Partially_confirmed	embryonic development ending in birth or egg hatching	hydrolase activity	---	1.84
178000_at	srh-63	Serpentine Receptor, class H /// locus:srh-63	---	---	integral to membrane	-1.86
178004_at	F53A2.9	hypothetical protein /// status:Partially_confirmed	---	---	---	-2.01
178017_s_at	F01D5.1	hypothetical protein /// status:Confirmed	---	protein binding	---	-4.9
178018_at	T23D8.7	hypothetical protein /// status:Partially_confirmed	---	nucleic acid binding	---	2.82
178029_at	C07E3.6	hypothetical protein /// status:Partially_confirmed	regulation of transcription, DNA-dependent /// regulation of transcription	DNA binding /// transcription factor activity /// sequence-specific DNA binding	nucleus	-2.01
178030_at	fbxa-18	F-box A protein /// locus:fbxa-18	---	---	---	-1.86
178040_at	F29G6.2	hypothetical protein /// status:Partially_confirmed	---	protein binding	---	-1.86
178041_at	F16C3.2	hypothetical protein /// status:Confirmed	---	---	---	-2.11
178043_at	sqrd-1	Sulfide Quinone oxidoReDuctase /// locus:sqrd-1	oxidation reduction	oxidoreductase activity	---	-2.85
178078_at	T12D8.9	hypothetical protein	---	---	integral to membrane	2.12
178083_s_at	fcd-2	human FANCD2 (Fanconi's anemia defect) ortholog /// locus:fcd-2	embryonic development ending in birth or egg hatching	---	---	1.82
178087_s_at	lys-5lys-6	LYSozyme /// LYSozyme /// locus:lys-5 /// locus:lys-6	carbohydrate metabolic process /// peptidoglycan catabolic process /// cell wall catabolic process	lysozyme activity /// catalytic activity /// cation binding	---	2.54
178094_at	F41E7.7	hypothetical protein /// status:Partially_confirmed	---	---	integral to membrane	-2
178099_at	F56H6.4	hypothetical protein /// status:Predicted	---	---	---	-2.45
178101_at	F59F5.1	hypothetical protein /// status:Partially_confirmed	---	---	integral to membrane	2.17
178107_at	ZK652.6	hypothetical protein	---	DNA binding /// protein binding /// zinc ion binding /// metal ion binding	intracellular /// nucleus	1.93
178112_at	rrf-3	RNA-dependent RNA polymerase Family /// locus:rrf-3	embryonic development ending in birth or egg hatching	---	---	2.64
178118_at	fbxa-185	F-box A protein /// locus:fbxa-185	---	---	---	-3.08
178136_at	W03C9.6	hypothetical protein /// status:Partially_confirmed	immune response	tumor necrosis factor receptor binding	membrane /// integral to membrane	1.86
178149_s_at	spp-1	SaPosin-like Protein family /// locus:spp-1	determination of adult life span	---	---	-2.12
178186_at	F25H5.8	hypothetical protein /// status:Partially_confirmed	---	---	integral to membrane	-1.93
178211_at	F08G5.1	hypothetical protein /// status:Confirmed	embryonic development ending in birth or egg hatching	protein binding	---	2.1
178212_s_at	pqn-59	Prion-like-(Q/N-rich)-domain-bearing protein /// locus:pqn-59	reproduction /// nematode larval development /// embryonic development ending in birth or egg hatching /// growth /// locomotion	protein binding	---	2.21
178233_at	F49H6.5	hypothetical protein /// status:Partially_confirmed	Mo-molybdopterin cofactor biosynthetic process /// metabolic process /// positive regulation of growth rate	catalytic activity /// metal ion binding /// iron-sulfur cluster binding /// 4 iron, 4 sulfur cluster binding	molybdopterin synthase complex	-4.27
178238_at	fbxa-189	F-box A protein /// locus:fbxa-189	---	---	---	-1.94
178240_at		status:Confirmed /// status:Partially_confirmed /// hypothetical protein /// hypothetical protein	---	---	---	-3.07
178250_at	M01E5.1	hypothetical protein /// status:Predicted	---	---	integral to membrane	-2.02
178259_at	F36A2.3	hypothetical protein /// status:Confirmed	metabolic process /// oviposition /// locomotion	oxidoreductase activity	---	1.92
178276_at	C07H4.1	hypothetical protein /// status:Partially_confirmed	---	---	integral to membrane	-2.7
178290_at	grl-3	GRound-Like (grd related) /// locus:grl-3	---	---	---	-11.3
178291_at	---	---	---	---	---	2.42
178295_at	F47H4.2	hypothetical protein	---	---	---	-3.15
178298_at	F13A7.7	hypothetical protein /// status:Partially_confirmed	---	---	---	-2.09
178312_at	T27C5.8	hypothetical protein /// status:Partially_confirmed	---	---	integral to membrane	-7.67
178315_at	K08C7.7	hypothetical protein /// status:Partially_confirmed	---	---	---	-2.09
178322_at		status:Partially_confirmed /// hypothetical protein	---	hydrolase activity	---	-2.51
178327_s_at	acl-5	ACyLtransferase-like	metabolic process	acyltransferase activity	integral to membrane	2.27
178340_at	K08H2.3	hypothetical protein /// status:Partially_confirmed	---	---	---	1.8
178341_at	T05F1.7	hypothetical protein /// status:Partially_confirmed	---	---	---	1.9
178349_at	F33H2.2	hypothetical protein /// status:Partially_confirmed	morphogenesis of an epithelium /// oviposition /// locomotion	---	---	2.07
178372_at		status:Partially_confirmed /// hypothetical protein	---	---	integral to membrane	-1.97
178375_at	D1053.2	hypothetical protein /// status:Partially_confirmed	chromatin modification	histone-lysine N-methyltransferase activity	nucleus	-1.96
178393_at		status:Partially_confirmed /// hypothetical protein	---	---	---	-2.04
178399_s_at	scc-3	yeast SCC (mitotic condensin subunit) homolog /// locus:scc-3	reproduction /// mitotic sister chromatid segregation /// nematode larval development /// sister chromatid cohesion /// meiosis /// embryonic development /// embryonic development ending in birth or egg hatching /// locomotion /// hermaphrodite genitalia development	binding /// protein binding	---	2.34
178405_at	C05G5.1	hypothetical protein /// status:Partially_confirmed	---	---	integral to membrane	1.84
178409_s_at	lys-6	LYSozyme /// locus:lys-6	carbohydrate metabolic process /// peptidoglycan catabolic process /// cell wall catabolic process	lysozyme activity /// catalytic activity /// cation binding	---	2.13
178412_at	R02D5.3	hypothetical protein /// status:Confirmed	---	---	integral to membrane	-2.48
178414_s_at	dog-1	Deletions Of G-rich DNA /// locus:dog-1	reproduction /// telomere maintenance /// nucleobase, nucleoside, nucleotide and nucleic acid metabolic process /// maintenance of DNA repeat elements	nucleic acid binding /// DNA binding /// ATP-dependent DNA helicase activity /// ATP binding /// ATP-dependent helicase activity /// hydrolase activity, acting on acid anhydrides, in phosphorus-containing anhydrides	nucleus	1.89
178417_s_at	W09C5.7	hypothetical protein /// status:Partially_confirmed	---	---	---	2.08
178419_at	srw-33	Serpentine Receptor, class W /// locus:srw-33	G-protein coupled receptor protein signaling pathway /// hermaphrodite genitalia development	---	integral to membrane	-2.67
178430_at	C35C5.9	hypothetical protein /// status:Confirmed	---	---	---	-1.84
178434_at	F57G4.1	hypothetical protein /// status:Predicted	---	---	integral to membrane	-2.98
178435_at	C17H1.7	hypothetical protein /// status:Partially_confirmed	---	---	---	-10.22
178438_s_at	rnp-8	RNP (RRM RNA binding domain) containing /// locus:rnp-8	---	nucleotide binding /// nucleic acid binding	---	2.11
178441_at	C34C6.7	hypothetical protein /// status:Partially_confirmed	---	protein binding	---	-2.56
178448_at	C03D6.1	hypothetical protein /// status:Partially_confirmed	reproduction /// nematode larval development /// embryonic development ending in birth or egg hatching /// body morphogenesis /// growth /// positive regulation of growth rate /// hermaphrodite genitalia development	---	---	-2.31
178450_at	D1043.1	hypothetical protein /// status:Partially_confirmed	nematode larval development /// embryonic development ending in birth or egg hatching /// body morphogenesis /// growth /// locomotion	binding	---	1.91
178452_s_at	fbxa-69	F-box A protein /// locus:fbxa-69	---	---	---	-2.94
178468_at	srd-70	Serpentine Receptor, class D (delta) /// locus:srd-70	---	---	integral to membrane	-1.89
178487_at		status:Predicted /// hypothetical protein	---	---	membrane /// integral to membrane	-1.98
178503_at	W02D9.6	hypothetical protein /// status:Confirmed	---	---	---	-3.83
178505_s_at	F40F8.4	hypothetical protein /// status:Confirmed	---	---	---	-2.07
178550_at	C33G3.5	hypothetical protein /// status:Partially_confirmed	---	---	---	-2.46
178562_at	F56G4.6	hypothetical protein /// status:Partially_confirmed	---	heat shock protein binding	---	2.02
178571_s_at	fipr-22	FIP (Fungus-Induced Protein) Related /// FIP (Fungus-Induced Protein) Related /// locus:fipr-22 /// locus:fipr-23	---	---	integral to membrane	1.89
178571_s_at	fipr-23	FIP (Fungus-Induced Protein) Related /// FIP (Fungus-Induced Protein) Related /// locus:fipr-22 /// locus:fipr-23	---	---	integral to membrane	1.89
178582_at	C47F8.7	hypothetical protein /// status:Predicted	---	---	---	-2.92
178591_at	grl-17	GRound-Like (grd related) /// locus:grl-17	---	---	---	-11.2
178600_at	F26E4.2	hypothetical protein /// status:Partially_confirmed	mitotic spindle organization /// positive regulation of vulval development	protein binding	integral to membrane	-2.89
178613_at	F36F2.2	hypothetical protein /// status:Partially_confirmed	---	---	---	-2.62
178614_s_at	F36F2.2	hypothetical protein /// status:Partially_confirmed	---	---	---	-2.4
178629_at		status:Confirmed /// hypothetical protein	---	---	---	-1.92
178636_at	che-13	abnormal CHEmotaxis /// locus:che-13	chemosensory behavior /// protein localization /// cilium assembly /// dauer entry	structural molecule activity	cilium /// microtubule basal body /// cell projection	1.85
178639_at	sru-15	Serpentine Receptor, class U /// locus:sru-15	embryonic development ending in birth or egg hatching	---	integral to membrane	-2.45
178648_s_at	F30F8.1	hypothetical protein /// status:Partially_confirmed	---	---	---	2.16
178651_at	F08G2.5	hypothetical protein /// status:Partially_confirmed	---	protein binding	---	-3.27
178654_s_at	W04A8.4	hypothetical protein /// status:Confirmed	nucleobase, nucleoside, nucleotide and nucleic acid metabolic process	nucleic acid binding /// 3'-5' exonuclease activity	intracellular	-1.89
178658_at	C08E8.1	hypothetical protein /// status:Confirmed	---	---	integral to membrane	-1.95
178669_s_at	ins-24	INSulin related /// locus:ins-24	---	hormone activity	extracellular region	-2.08
178671_at	---	---	---	---	---	2.32
178672_s_at	C45E1.4	hypothetical protein /// status:Partially_confirmed	---	---	integral to membrane	2.52
178679_at	fbxa-140	F-box A protein /// locus:fbxa-140	---	---	integral to membrane	1.81
178688_s_at	K08D8.3	hypothetical protein /// status:Partially_confirmed	---	---	---	1.93
178704_s_at	cki-1	CKI family (Cyclin-dependent Kinase Inhibitor) /// locus:cki-1	nematode larval development /// ubiquitin-dependent protein catabolic process /// cell cycle /// cell cycle arrest /// gonad development /// embryonic development ending in birth or egg hatching /// body morphogenesis /// oviposition /// growth /// positive regulation of growth rate /// locomotion /// negative regulation of multicellular organism growth /// hermaphrodite genitalia development ///…	protein kinase inhibitor activity /// cyclin-dependent protein kinase inhibitor activity	nucleus	-1.95
178723_at	F54D5.3	hypothetical protein /// status:Confirmed	---	---	---	-2.14
178724_s_at	F54D5.3	hypothetical protein /// status:Confirmed	---	---	---	-2.53
178737_at	K08C7.6	hypothetical protein /// status:Confirmed	---	---	---	-2.28
178742_s_at	F57C2.5	hypothetical protein /// status:Confirmed	biosynthetic process	strictosidine synthase activity	---	1.91
178767_at	C10C5.2	hypothetical protein /// status:Partially_confirmed	---	---	---	-2.85
178770_at	C14A4.7	hypothetical protein	---	---	integral to membrane	-2.2
178777_s_at	D2085.5	hypothetical protein	metabolic process	---	---	2.23
178780_at	C54C8.3	hypothetical protein /// status:Partially_confirmed	protein amino acid glycosylation	galactosyltransferase activity /// transferase activity /// transferase activity, transferring glycosyl groups	Golgi apparatus /// membrane /// integral to membrane	-2.18
178786_s_at	D1081.7	hypothetical protein	---	---	---	2.33
178789_at	F25B3.2	hypothetical protein /// status:Partially_confirmed	---	---	integral to membrane	-1.92
178790_at	F47B8.3	hypothetical protein /// status:Partially_confirmed	cell redox homeostasis	electron carrier activity /// protein disulfide oxidoreductase activity	---	-1.93
178797_at	C49F5.7	hypothetical protein /// status:Confirmed	---	---	---	-3.48
178798_s_at	K02B7.3	hypothetical protein	---	---	---	-2.43
178799_at	F14D7.7	hypothetical protein /// status:Partially_confirmed /// status:Predicted	---	---	---	-3.56
178809_at		status:Predicted /// hypothetical protein	---	---	integral to membrane	-1.89
178831_at	fbxa-169	F-box A protein /// locus:fbxa-169	---	---	---	1.8
178834_at	F47B8.2	hypothetical protein /// status:Partially_confirmed	---	---	integral to membrane	-2.61
178843_at	F08G5.6	hypothetical protein /// status:Confirmed	defense response	---	---	-1.85
178848_at	str-245	Seven TM Receptor /// locus:str-245	locomotion	---	integral to membrane	-1.91
178854_at	M05B5.2	hypothetical protein /// status:Confirmed	nematode larval development /// growth /// positive regulation of growth rate /// locomotion /// negative regulation of multicellular organism growth /// positive regulation of multicellular organism growth	---	integral to membrane	-2.17
178856_at	srg-45	Serpentine Receptor, class G (gamma) /// locus:srg-45	signal transduction /// sensory perception of chemical stimulus	transmembrane receptor activity	membrane /// integral to membrane	-1.9
178873_at	C43F9.4	hypothetical protein /// status:Partially_confirmed	---	---	integral to membrane	-6
178883_at	F19C7.8	hypothetical protein	---	---	---	-2
178889_at	tag-243	Temporarily Assigned Gene name /// locus:tag-243	positive regulation of growth rate	---	---	-2.16
178892_at	fbxa-172	F-box A protein /// locus:fbxa-172	---	---	---	-3.79
178895_at	R06C7.1	hypothetical protein /// status:Confirmed	multicellular organismal development	nucleic acid binding	---	2.27
178898_at	F55C9.3	hypothetical protein /// status:Partially_confirmed	---	---	---	-1.91
178924_at	C17H1.6	hypothetical protein /// status:Partially_confirmed	---	---	---	-3.15
178927_at	K08D8.5	hypothetical protein /// status:Confirmed	---	---	---	3.71
178961_at	---	---	---	---	---	-4.67
178971_s_at	R10E8.6	hypothetical protein /// status:Partially_confirmed	---	---	---	-1.82
179022_at	C50F4.1	hypothetical protein /// status:Partially_confirmed	---	---	---	-1.95
179031_s_at	F53F4.7	hypothetical protein /// status:Partially_confirmed	---	---	integral to membrane	-5.47
179034_s_at	M03B6.3	hypothetical protein /// status:Confirmed	---	---	---	2.22
179039_at	K08E4.2	hypothetical protein /// status:Confirmed	glycolipid transport	glycolipid transporter activity /// glycolipid binding	cytoplasm	-1.93
179043_at	C09G9.5	hypothetical protein /// status:Confirmed	---	---	integral to membrane	-1.92
179045_at	---	---	---	---	---	2.27
179046_at	F46A9.1	hypothetical protein /// status:Confirmed	---	---	---	-2.09
179048_at		status:Partially_confirmed /// hypothetical protein	---	inositol trisphosphate 3-kinase activity	---	-2.04
179054_at	C43F9.7	hypothetical protein /// status:Partially_confirmed	---	---	integral to membrane	-1.87
179069_at	C08E8.4	hypothetical protein /// status:Partially_confirmed	metabolic process	oxidoreductase activity	---	-7.98
179078_s_at	F54C9.3	hypothetical protein /// status:Confirmed	---	---	---	-3.05
179093_at	T16G1.4	hypothetical protein /// status:Partially_confirmed	---	---	---	4.72
179094_s_at	T16G1.4	hypothetical protein /// status:Partially_confirmed	---	---	---	3.29
179098_at	T19C9.8	hypothetical protein /// status:Partially_confirmed	---	---	---	-7.08
179102_at	T28C6.8	hypothetical protein /// status:Confirmed	---	---	integral to membrane	-2.01
179118_at	fbxa-82	F-box A protein	---	---	---	-2.53
179149_at	F47B8.8	hypothetical protein /// status:Confirmed	---	metallopeptidase activity /// zinc ion binding	---	-2.3
179160_at	T26H5.4	hypothetical protein /// status:Partially_confirmed	---	protein binding	---	-4.23
179164_at	C06G8.1	hypothetical protein /// status:Confirmed	---	---	integral to membrane	-3.41
179169_s_at	W09G3.6	hypothetical protein	---	magnesium ion binding /// protein binding /// zinc ion binding /// transferase activity /// thiamin pyrophosphate binding	---	2.64
179175_at	T04B2.5	hypothetical protein /// status:Confirmed	lipid metabolic process /// metabolic process	hydrolase activity	---	-2.76
179183_at	fbxa-193	F-box A protein /// locus:fbxa-193	carbohydrate metabolic process	hydrolase activity, hydrolyzing O-glycosyl compounds	---	2.5
179187_s_at	F46F2.3	hypothetical protein /// status:Confirmed	embryonic development ending in birth or egg hatching	---	integral to membrane	1.85
179197_s_at	fbxa-136	F-box A protein	embryonic development ending in birth or egg hatching	calcium ion binding	---	-3.29
179199_at	T09F5.1	hypothetical protein /// status:Partially_confirmed	protein amino acid glycosylation	galactosyltransferase activity /// transferase activity /// transferase activity, transferring glycosyl groups	Golgi apparatus /// membrane /// integral to membrane	-2.01
179204_s_at	T27F2.4	hypothetical protein /// status:Confirmed	regulation of transcription, DNA-dependent /// negative regulation of multicellular organism growth	transcription factor activity /// sequence-specific DNA binding /// protein dimerization activity	nucleus	-2.03
179207_at	R06C1.6	hypothetical protein /// status:Partially_confirmed	---	---	---	-2.08
179210_at	T05F1.9	hypothetical protein /// status:Partially_confirmed	---	---	---	1.97
179214_at	F54B8.4	hypothetical protein /// status:Partially_confirmed	---	---	---	-4.36
179217_s_at	K08E7.1	hypothetical protein /// status:Confirmed	---	---	---	1.99
179219_at	unc-80	UNCoordinated	positive regulation of locomotion /// response to drug	---	---	2.63
179228_at	sdz-27	SKN-1 Dependent Zygotic transcript /// locus:sdz-27	---	---	integral to membrane	-3.79
179233_at	F20D1.1	hypothetical protein /// status:Confirmed	---	protein binding	integral to membrane	-2.12
179235_at	C31H5.5	hypothetical protein /// status:Partially_confirmed	---	---	---	-1.93
179245_at	F57B1.6	hypothetical protein	---	---	integral to membrane	-1.99
179266_at	F15D4.5	hypothetical protein /// status:Partially_confirmed	---	nucleic acid binding /// zinc ion binding	---	-3.22
179268_s_at	F15B9.10	hypothetical protein /// status:Partially_confirmed	---	---	integral to membrane	2.29
179301_at	T26F2.3	hypothetical protein /// status:Partially_confirmed	---	---	---	-6.4
179306_at	F32D8.8	hypothetical protein /// status:Partially_confirmed	---	---	integral to membrane	-1.94
179315_at	C50F4.4	hypothetical protein /// status:Partially_confirmed	---	---	---	-1.81
179320_at	inft-2	INverted Formin/formin Three-related /// locus:inft-2	cellular component organization /// actin cytoskeleton organization	actin binding	---	1.88
179337_at	prom-1	PRogression Of Meiosis /// locus:prom-1	---	---	---	1.94
179339_s_at	lgc-20	Ligand-Gated ion Channel /// locus:lgc-20	transport /// ion transport	extracellular ligand-gated ion channel activity	membrane /// integral to membrane /// postsynaptic membrane	-1.98
179346_at	B0284.1	hypothetical protein /// status:Partially_confirmed	nematode larval development /// growth /// positive regulation of multicellular organism growth	---	---	-5.92
179368_at	immt-2	Inner Membrane of MiTochondria protein homolog /// locus:immt-2	positive regulation of multicellular organism growth	---	integral to membrane	1.88
179373_at	C50F4.9	hypothetical protein /// status:Partially_confirmed	---	---	---	-2.41
179376_at	K09C8.2	hypothetical protein /// status:Confirmed	---	---	integral to membrane	-1.9
179394_at	T03E6.2	hypothetical protein /// status:Predicted	---	---	integral to membrane	-1.81
179398_at	F16H6.7	hypothetical protein /// status:Partially_confirmed	---	---	---	1.98
179414_s_at	R06A4.2	hypothetical protein /// status:Partially_confirmed	---	---	---	1.99
179416_at		status:Partially_confirmed /// hypothetical protein	reproduction /// proteolysis /// embryonic development ending in birth or egg hatching /// positive regulation of multicellular organism growth	metalloendopeptidase activity	---	2.38
179418_at		status:Partially_confirmed /// hypothetical protein	---	---	---	-2.45
179424_at	spp-18	SaPosin-like Protein family /// locus:spp-18	---	---	---	-4.06
179428_at		status:Partially_confirmed /// hypothetical protein	---	---	---	-2.54
179435_at	T04B2.3	hypothetical protein	---	---	---	-2.33
179438_at		status:Predicted /// hypothetical protein	---	---	---	-1.89
179439_s_at	F11E6.3	hypothetical protein /// status:Confirmed	positive regulation of growth rate	---	---	2.99
179444_s_at	F11E6.7	hypothetical protein /// status:Partially_confirmed	---	---	---	2.08
179454_at	C49C3.8	hypothetical protein /// status:Confirmed	---	---	---	-2.67
179457_at	B0024.4	hypothetical protein /// status:Confirmed	positive regulation of growth rate	---	---	-5.31
179462_at	fipr-6 fipr-7 fipr-8 fipr-9	FIP (Fungus-Induced Protein) Related /// FIP (Fungus-Induced Protein) Related /// FIP (Fungus-Induced Protein) Related /// FIP (Fungus-Induced Protein) Related /// locus:fipr-8 /// locus:fipr-7 /// locus:fipr-6 /// locus:fipr-9	---	---	integral to membrane	2.13
179483_at	F16H6.5	hypothetical protein /// status:Partially_confirmed	---	---	---	-1.87
179492_at	F47B8.4	hypothetical protein /// status:Partially_confirmed	cell redox homeostasis	electron carrier activity /// protein disulfide oxidoreductase activity	---	-4.02
179498_at	fbxa-157	F-box A protein /// locus:fbxa-157	---	---	---	-2.5
179499_s_at	fbxa-156	F-box A protein /// F-box A protein /// locus:fbxa-156 /// locus:fbxa-157	---	---	---	-2.07
179499_s_at	fbxa-157	F-box A protein /// F-box A protein /// locus:fbxa-156 /// locus:fbxa-157	---	---	---	-2.07
179501_at	fbxb-119	F-box B protein /// locus:fbxb-119	embryonic development ending in birth or egg hatching	---	---	1.88
179502_at	T28D6.3	hypothetical protein /// status:Confirmed	---	---	---	-5.94
179508_s_at	mdt-29	MeDiaTor /// locus:mdt-29	transcription /// regulation of transcription, DNA-dependent /// regulation of cell fate specification /// positive regulation of Notch signaling pathway /// lateral inhibition	protein binding	nucleus	2.17
179511_at	F20G2.5	hypothetical protein /// status:Partially_confirmed	defense response	---	---	-2.16
179525_at	hrg-4	Heme Responsive Gene	transport	---	plasma membrane /// membrane /// integral to membrane	5.93
179528_at		status:Confirmed /// hypothetical protein	---	---	integral to membrane	-2.18
179533_at	C06B8.2	hypothetical protein	---	catalytic activity /// metal ion binding	integral to membrane	2.63
179534_s_at	T23F1.5	hypothetical protein /// status:Partially_confirmed	---	---	integral to membrane	-1.97
179537_at	C50B8.4	hypothetical protein /// status:Confirmed	---	---	integral to membrane	-2.52
179547_at		status:Predicted /// hypothetical protein	---	---	integral to membrane	-2.31
179591_at	far-6	Fatty Acid/Retinol binding protein /// locus:far-6	---	lipid binding	---	-1.88
179608_at	fbxb-70	F-box B protein /// locus:fbxb-70	---	---	---	-2.29
179609_at		status:Confirmed /// hypothetical protein	---	---	---	-2.37
179613_at	C50F4.8	hypothetical protein /// status:Confirmed	---	---	---	-2.29
179618_s_at	---	---	---	---	---	1.92
179620_s_at	T10G3.3	hypothetical protein /// status:Partially_confirmed	---	---	---	-1.95
179623_s_at	B0035.6	hypothetical protein /// status:Confirmed	---	---	---	2.5
179629_at	B0284.2	hypothetical protein /// status:Partially_confirmed	---	---	---	-3.34
179642_at	spp-16	SaPosin-like Protein family /// locus:spp-16	---	---	---	-2.63
179645_s_at	F56A8.8	hypothetical protein /// status:Partially_confirmed	---	---	---	-1.92
179647_s_at	W07G1.7	hypothetical protein /// status:Partially_confirmed	---	---	---	-3.25
179649_s_at	C13B4.1	hypothetical protein	histidine catabolic process	dopamine beta-monooxygenase activity	integral to membrane	2.04
179650_at	K08D8.4	hypothetical protein	---	---	---	1.85
179651_s_at	fbxa-156	F-box A protein /// locus:fbxa-156	---	---	---	-1.94
179671_at	com-1	Completion Of Meiotic recombination (budding yeast Com) related /// locus:com-1	---	---	---	1.97
179685_at	T12G3.7	hypothetical protein	---	---	integral to membrane	1.83
179686_at	tag-297	Temporarily Assigned Gene name /// locus:tag-297	nematode larval development /// molting cycle, collagen and cuticulin-based cuticle /// growth /// locomotion	---	---	1.91
179690_at	W02A2.5	hypothetical protein /// hypothetical protein /// status:Predicted /// status:Predicted	translation	structural constituent of ribosome	intracellular /// ribosome /// integral to membrane	-3.53
179690_at	W02A2.9	hypothetical protein /// hypothetical protein /// status:Predicted /// status:Predicted	translation	structural constituent of ribosome	intracellular /// ribosome /// integral to membrane	-3.53
179693_at	F53H2.1	hypothetical protein /// status:Partially_confirmed	positive regulation of growth rate	---	---	-5.11
179695_at	F35E12.5	hypothetical protein /// status:Predicted	---	---	---	-2.39
179709_at	fut-2	FUcosyl Transferase /// locus:fut-2	carbohydrate metabolic process	galactoside 2-alpha-L-fucosyltransferase activity /// transferase activity	Golgi apparatus /// membrane /// integral to membrane	-1.9
179710_s_at	grl-9	GRound-Like (grd related) /// locus:grl-9	---	---	---	-2.08
179711_s_at	F17A9.4	hypothetical protein /// status:Confirmed	metabolic process	catalytic activity /// FMN binding /// oxidoreductase activity	---	2.35
179725_at	F40H6.6F59H6.3	hypothetical protein /// hypothetical protein /// status:Predicted /// status:Predicted	reproduction /// nematode larval development /// embryonic development ending in birth or egg hatching /// growth	---	integral to membrane	2.11
179727_at		status:Confirmed /// hypothetical protein	---	---	integral to membrane	-2.2
179728_at	fbxa-165	F-box A protein /// locus:fbxa-165	---	---	---	-6.84
179738_at	F10D2.12	hypothetical protein /// status:Partially_confirmed	metabolic process	transferase activity /// transferase activity, transferring glycosyl groups /// transferase activity, transferring hexosyl groups	integral to membrane	3.29
179750_at	D1037.1	hypothetical protein /// status:Partially_confirmed	---	nucleic acid binding /// RNA binding /// double-stranded RNA binding	intracellular	2.28
179768_at	sul-3	SULfatase domain protein	metabolic process	catalytic activity /// sulfuric ester hydrolase activity	---	3.41
179778_at	F27D9.2	hypothetical protein /// status:Confirmed	transport	transporter activity	integral to membrane	5.1
179779_at	fbxa-162	F-box A protein /// locus:fbxa-162	---	---	---	-2.22
179782_s_at	W01F3.1	hypothetical protein	---	---	---	-3.7
179786_at	---	---	---	---	---	-3.42
179804_s_at	F49E7.2	hypothetical protein /// status:Partially_confirmed	---	---	integral to membrane	-2.69
179805_s_at	T04G9.7	hypothetical protein /// status:Confirmed	embryonic development ending in birth or egg hatching	---	---	-1.88
179815_at	T23F4.3	hypothetical protein /// status:Partially_confirmed	---	hydrolase activity	---	-2.42
179818_at	C06G3.3	hypothetical protein /// status:Confirmed	---	---	---	-1.83
179831_at	drsh-1	Ortholog of Drosophila DRoSHa gene	cytokinesis /// rRNA processing /// RNA processing /// mitotic spindle organization /// multicellular organismal development /// gonadal mesoderm development /// embryonic development ending in birth or egg hatching /// sexual reproduction /// primary microRNA processing /// ribosome biogenesis	RNA binding /// double-stranded RNA binding /// nuclease activity /// endonuclease activity /// ribonuclease III activity /// ribonuclease III activity /// hydrolase activity	intracellular /// nucleus /// nucleus	2.18
179837_s_at	cdh-3	CaDHerin family /// locus:cdh-3	cell adhesion /// homophilic cell adhesion /// morphogenesis of embryonic epithelium /// tail tip morphogenesis	calcium ion binding /// protein binding	plasma membrane /// membrane /// integral to membrane /// cell junction	2.27
179841_s_at	zer-1	Zyg Eleven Related	ubiquitin-dependent protein catabolic process /// regulation of ubiquitin-protein ligase activity	ubiquitin-protein ligase activity /// binding	Cul2-RING ubiquitin ligase complex	1.89
179870_at	fbxb-21	F-box B protein /// locus:fbxb-21	---	---	---	-2.08
179871_at	fbxa-54	F-box A protein /// locus:fbxa-54	---	---	---	-2.06
179879_at		status:Partially_confirmed /// hypothetical protein	lipid metabolic process	triacylglycerol lipase activity	---	-1.95
179891_s_at	T07D3.9	hypothetical protein	---	---	---	2.14
179898_s_at	mrg-1	human MRG (Mortality factor-Related Gene) related	reproduction /// negative regulation of transcription from RNA polymerase II promoter /// chromatin assembly or disassembly /// gamete generation /// germ cell development /// embryonic development ending in birth or egg hatching /// body morphogenesis /// hermaphrodite genitalia development /// positive regulation of transcription from RNA polymerase II promoter	chromatin binding	chromatin /// nucleus	2.06
179909_at	oac-20	O-ACyltransferase homolog /// locus:oac-20	regulation of transcription, DNA-dependent	transcription factor activity /// transferase activity, transferring acyl groups other than amino-acyl groups /// sequence-specific DNA binding	nucleus /// integral to membrane	2.72
179911_at	fbxa-59	F-box A protein /// locus:fbxa-59	---	---	---	-2.1
179913_at	E04F6.9	hypothetical protein /// status:Confirmed	---	---	---	-6
179919_at	try-9	TRYpsin-like Protease /// locus:try-9	proteolysis	catalytic activity /// serine-type endopeptidase activity /// peptidase activity	---	-6.38
179927_at	T07D3.4	hypothetical protein /// status:Confirmed	embryonic development ending in birth or egg hatching	---	integral to membrane	-1.91
179933_at	F39E9.1	hypothetical protein /// status:Predicted /// status:Partially_confirmed /// hypothetical protein	---	---	---	-2.83
179934_s_at	C27D9.1	hypothetical protein /// status:Partially_confirmed	reproduction /// embryonic development ending in birth or egg hatching /// body morphogenesis	---	---	2.07
179935_at	C27F2.8	hypothetical protein /// status:Partially_confirmed	nematode larval development /// embryonic development ending in birth or egg hatching /// body morphogenesis /// growth /// positive regulation of growth rate /// locomotion /// positive regulation of multicellular organism growth	protein binding	integral to membrane	1.96
179937_s_at	ketn-1	KETtiN (Drosophila actin-binding) homolog	positive regulation of growth rate	---	---	1.89
179956_at	B0207.9	hypothetical protein /// status:Partially_confirmed	---	---	integral to membrane	-1.95
179960_at	C07G1.6	hypothetical protein /// status:Partially_confirmed	---	---	---	-2.23
179969_at	btb-15	BTB (Broad/complex/Tramtrack/Bric a brac) domain protein /// locus:btb-15	---	protein binding	---	-2.23
179972_at	---	---	---	---	---	-1.99
179986_at		status:Partially_confirmed /// hypothetical protein	---	---	---	2.02
179989_at	fbxa-99	F-box A protein /// locus:fbxa-99	---	---	---	-2.2
179991_s_at	hlh-28hlh-29	Helix Loop Helix /// Helix Loop Helix /// locus:hlh-28 /// locus:hlh-29	morphogenesis of an epithelium /// gonad development /// embryonic development ending in birth or egg hatching /// oviposition /// vulval development /// hermaphrodite genitalia development /// regulation of transcription	transcription regulator activity	nucleus	-2
179993_at	F35C11.6	hypothetical protein /// status:Partially_confirmed	---	---	---	-2.86
180006_s_at	fbxa-161	F-box A protein /// locus:fbxa-161	---	---	---	-1.9
180010_at	C44B7.7	hypothetical protein /// status:Partially_confirmed	---	---	integral to membrane	-1.84
180020_at	T05E11.7	hypothetical protein /// status:Partially_confirmed	---	---	---	-2.01
180025_at	T02G5.2	hypothetical protein /// status:Partially_confirmed	---	calcium ion binding	---	3.96
180032_at	D2092.4	hypothetical protein /// status:Confirmed	cell redox homeostasis	---	integral to membrane	2.42
180047_at		status:Partially_confirmed /// hypothetical protein	transport	binding	membrane	1.87
180055_at		status:Confirmed /// hypothetical protein	nematode larval development /// body morphogenesis /// positive regulation of growth rate /// locomotion	---	integral to membrane	-1.87
180060_at		status:Partially_confirmed /// hypothetical protein	---	---	integral to membrane	-1.95
180067_at	C18E3.2	hypothetical protein /// status:Confirmed	reproduction /// nematode larval development /// embryonic development ending in birth or egg hatching /// growth /// hermaphrodite genitalia development	---	nucleus	1.94
180070_s_at	F10G7.9	hypothetical protein	---	protein binding	---	1.88
180082_at	fbxa-131	F-box A protein /// locus:fbxa-131	---	---	---	-1.95
180100_at	R04E5.9	hypothetical protein /// status:Confirmed	---	---	---	-2.24
180118_at	fbxa-170	F-box A protein /// locus:fbxa-170	---	---	---	1.99
180121_at		status:Predicted /// hypothetical protein	---	---	---	-1.93
180138_at	F36G9.13	hypothetical protein /// status:Partially_confirmed	---	---	integral to membrane	-2.12
180139_at	R08E5.4	hypothetical protein /// status:Partially_confirmed	---	---	---	-2.92
180159_at	fbxc-7	F-box C protein /// locus:fbxc-7	---	---	---	-2.27
180164_at	fbxc-16	F-box C protein /// locus:fbxc-16	---	---	---	-2.06
180179_at	K06A5.8	hypothetical protein	---	protein binding	---	1.84
180211_at	F14H3.12	hypothetical protein /// status:Partially_confirmed	protein amino acid phosphorylation	protein serine/threonine kinase activity /// ATP binding	---	-2.36
180212_at	C44B7.6	hypothetical protein	---	---	membrane /// integral to membrane	-3.28
180221_at	F54E2.5	hypothetical protein /// status:Partially_confirmed	---	---	integral to membrane	-1.93
180223_s_at	T23F4.1T23F4.3	hypothetical protein /// hypothetical protein /// status:Predicted /// status:Partially_confirmed	---	hydrolase activity	---	-5.16
180229_s_at	scl-24scl-25	SCP-Like extracellular protein /// SCP-Like extracellular protein /// locus:scl-24 /// locus:scl-25	---	---	extracellular region	-3.27
180235_at	srt-25	Serpentine Receptor, class T /// locus:srt-25	---	receptor activity	integral to membrane	-2.26
180293_at	clec-108	C-type LECtin /// locus:clec-108	---	binding	---	-5.48
180296_at		status:Partially_confirmed /// hypothetical protein	---	binding	---	-3.22
180306_at	C10G8.4	hypothetical protein /// status:Partially_confirmed	---	---	integral to membrane	-2
180311_at	M04G7.1	hypothetical protein /// status:Partially_confirmed	---	---	integral to membrane	-2.13
180315_at	F44G3.10	hypothetical protein /// status:Confirmed	---	---	integral to membrane	-3.6
180325_at	F14D2.2	hypothetical protein /// status:Partially_confirmed	embryonic development ending in birth or egg hatching	---	---	2.1
180331_at	srt-22	Serpentine Receptor, class T /// locus:srt-22	---	---	integral to membrane	2.02
180341_s_at	grl-20	GRound-Like (grd related) /// locus:grl-20	---	---	---	-2.24
180345_s_at	K07H8.9	hypothetical protein /// status:Confirmed	---	RNA binding	---	1.85
180352_at	F23H12.3	hypothetical protein	---	---	integral to membrane	-1.87
180353_at	T27E4.1	hypothetical protein /// status:Partially_confirmed	---	---	---	-1.99
180370_at	far-8	Fatty Acid/Retinol binding protein /// locus:far-8	---	---	---	-2.23
180376_s_at	dao-2	Dauer or Aging adult Overexpression /// locus:dao-2	---	---	---	-2.22
180379_s_at	C17F4.7	hypothetical protein /// status:Confirmed	---	---	---	6.91
180394_s_at	ekl-6	Enhancer of Ksr-1 Lethality /// locus:ekl-6	reproduction /// morphogenesis of an epithelium /// positive regulation of growth rate /// locomotion /// hermaphrodite genitalia development	binding	integral to membrane	2.46
180406_at	F59D6.7	hypothetical protein /// status:Partially_confirmed	---	calcium ion binding	---	-1.94
180409_at	clec-221	C-type LECtin /// locus:clec-221	---	binding	---	-1.98
180412_at	R05H10.1	hypothetical protein /// status:Confirmed	---	---	---	-2.73
180427_at		status:Confirmed /// hypothetical protein	---	---	---	-2.92
180438_at	F57C9.6	hypothetical protein /// status:Predicted	G-protein coupled receptor protein signaling pathway	---	integral to membrane	-2.01
180443_at	F08B6.1	hypothetical protein /// status:Partially_confirmed	---	---	---	-1.9
180448_s_at	T04C12.1	hypothetical protein /// status:Partially_confirmed	---	---	integral to membrane	-2.65
180449_at	srd-23	Serpentine Receptor, class D (delta) /// locus:srd-23	---	---	integral to membrane	-2.11
180450_at	F52E1.14	hypothetical protein /// status:Confirmed	---	---	---	-2.31
180452_at	clec-228clec-229	C-type LECtin /// C-type LECtin /// locus:clec-229 /// locus:clec-228	---	binding	---	-3.12
180453_at	F53A9.1	hypothetical protein /// status:Partially_confirmed	---	protein binding	---	-3.86
180475_s_at	F20B4.2	hypothetical protein	---	---	---	3.4
180483_at	W02D7.8	hypothetical protein /// status:Partially_confirmed	---	---	integral to membrane	-3.51
180490_s_at	ldb-1	LIM domain Binding Protein	multicellular organismal development /// mechanosensory behavior /// embryonic development ending in birth or egg hatching /// positive regulation of growth rate /// locomotion /// vulval development /// hermaphrodite genitalia development	transcription cofactor activity	nucleus	1.81
180496_at		status:Partially_confirmed /// hypothetical protein	positive regulation of growth rate	---	---	-3.11
180522_at	R11G1.2R11G1.7	hypothetical protein /// hypothetical protein /// status:Predicted /// status:Predicted	---	---	---	-1.87
180523_at	F47B10.5	hypothetical protein /// status:Partially_confirmed	---	---	integral to membrane	-2.15
180544_s_at	fbxa-182	F-box A protein /// locus:fbxa-182	---	---	---	-4.82
180550_at	srz-94	Serpentine Receptor, class Z /// locus:srz-94	---	---	integral to membrane	-1.87
180562_at	clec-52	C-type LECtin /// locus:clec-52	---	binding /// sugar binding	---	-36.54
180563_at	F47G3.3	hypothetical protein /// status:Partially_confirmed	embryonic development ending in birth or egg hatching	---	---	2.09
180569_at	B0507.10	hypothetical protein /// status:Partially_confirmed	---	---	---	-1.92
180575_at	C13A2.4	hypothetical protein /// status:Confirmed	---	---	integral to membrane	-17.08
180583_at	mat-3	Metaphase-to-Anaphase Transition defect /// locus:mat-3	reproduction /// morphogenesis of an epithelium /// nematode larval development /// meiosis /// embryonic development ending in birth or egg hatching /// body morphogenesis /// hermaphrodite genitalia development	binding /// protein binding	---	2.6
180592_s_at	clec-209	C-type LECtin /// hypothetical protein /// status:Predicted /// locus:clec-209	---	binding	---	-2.42
180602_at	T20D4.7	hypothetical protein /// status:Partially_confirmed	cell redox homeostasis	antioxidant activity /// oxidoreductase activity	---	-2.39
180606_at	F40G12.5	hypothetical protein /// status:Partially_confirmed	---	---	---	-6.58
180612_s_at	F53A9.8	hypothetical protein /// status:Confirmed	---	---	---	-2.39
180618_at	F14D2.7	hypothetical protein /// status:Predicted	ubiquitin-dependent protein catabolic process	ubiquitin thiolesterase activity	integral to membrane	2
180622_at	lact-1	beta-LACTamase domain containing /// locus:lact-1	---	---	---	1.86
180626_at	F02E8.4	hypothetical protein /// status:Partially_confirmed	---	---	---	2.08
180627_at	K04F1.9	hypothetical protein /// status:Partially_confirmed	---	---	---	-2.04
180633_at	C53B7.7	hypothetical protein /// status:Partially_confirmed	proteolysis	metalloendopeptidase activity	membrane	1.98
180642_at	F53A9.2	hypothetical protein /// status:Confirmed	---	protein binding	---	-3.56
180659_at	C13A2.6	hypothetical protein /// status:Partially_confirmed	---	---	---	-2.18
180663_s_at	T20D4.3T20D4.4	hypothetical protein /// hypothetical protein /// status:Partially_confirmed /// status:Partially_confirmed	---	---	---	2.17
180665_at	D2021.4	hypothetical protein	acyl-CoA metabolic process	acyl-CoA thioesterase activity	---	2.29
180667_at	T09B4.4	hypothetical protein /// status:Confirmed	---	calcium ion binding	---	-2.95
180721_at	ilys-2	Invertebrate LYSozyme /// locus:ilys-2	---	lysozyme activity	---	-5.18
180727_at	F49F1.5	hypothetical protein /// status:Confirmed	---	---	---	-2.51
180728_at	F17A9.5	hypothetical protein /// status:Partially_confirmed	metabolic process	catalytic activity /// FMN binding /// oxidoreductase activity	---	2.11
180736_s_at	lst-3	Lateral Signaling Target	positive regulation of growth rate /// locomotion /// positive regulation of locomotion	nucleic acid binding /// calcium ion binding /// protein binding	---	2.45
180747_s_at	dsc-4	Defecation Suppressor of Clk-1 /// locus:dsc-4	positive regulation of growth rate /// locomotion	---	---	2.78
180749_at	F22F7.4	hypothetical protein /// status:Partially_confirmed	---	---	integral to membrane	-3.21
180758_at	nlp-6	Neuropeptide-Like Protein /// locus:nlp-6	neuropeptide signaling pathway	---	integral to membrane	-2.9
180766_at	F13B6.3	hypothetical protein /// status:Partially_confirmed	---	---	---	2.6
180778_at	tag-184	Temporarily Assigned Gene name /// locus:tag-184	---	binding	---	2.24
180781_s_at	mut-16	MUTator	RNA interference /// gene silencing	---	---	2.14
180783_at	C25A8.4	hypothetical protein /// status:Partially_confirmed	polysaccharide catabolic process /// carbohydrate metabolic process /// chitin catabolic process /// metabolic process	catalytic activity /// hydrolase activity, hydrolyzing O-glycosyl compounds /// chitinase activity /// hydrolase activity /// hydrolase activity, acting on glycosyl bonds /// cation binding	extracellular region	1.89
180793_at	nol-9	NucleOLar protein /// locus:nol-9	reproduction /// positive regulation of growth rate	---	---	1.8
180797_s_at	F11D11.3F11D11.4	hypothetical protein /// hypothetical protein /// status:Partially_confirmed /// status:Predicted	---	---	---	-3.88
180803_at	sri-70	Serpentine Receptor, class I /// locus:sri-70	---	---	integral to membrane	-1.89
180806_at	F56C3.8	hypothetical protein /// status:Partially_confirmed	---	---	integral to membrane	-2.88
180808_at	W06G6.11	hypothetical protein	---	---	---	-3.74
180813_s_at	C01B4.7	hypothetical protein /// status:Predicted /// status:Predicted /// hypothetical protein	transport	transporter activity	integral to membrane	2.06
180815_at	K01H12.1	hypothetical protein /// status:Partially_confirmed	embryonic development ending in birth or egg hatching	zinc ion binding /// metal ion binding	---	-2.87
180819_at	C35E7.7	hypothetical protein /// status:Predicted	---	---	---	-1.93
180828_at		status:Partially_confirmed /// hypothetical protein	---	---	---	-1.95
180829_at	F23B2.10	hypothetical protein /// status:Partially_confirmed	---	protein binding /// zinc ion binding	---	-4.61
180838_at		status:Partially_confirmed /// hypothetical protein	nematode larval development /// rRNA processing /// embryonic development ending in birth or egg hatching /// growth /// positive regulation of growth rate /// locomotion /// ribosome biogenesis	binding	nucleus /// ribonucleoprotein complex	2.66
180842_s_at	C33A12.7	hypothetical protein /// status:Confirmed	---	hydrolase activity	---	-2.07
180846_at	C27D9.2	hypothetical protein /// status:Confirmed	---	---	---	-5.15
180852_at	F30A10.2	hypothetical protein /// status:Confirmed	nematode larval development /// embryonic development ending in birth or egg hatching /// growth	---	---	-2.25
180889_at	T17H7.1	hypothetical protein /// status:Partially_confirmed	embryonic development ending in birth or egg hatching	---	---	-2.44
180905_at	K02E11.5	hypothetical protein /// status:Partially_confirmed	metabolic process	transferase activity, transferring hexosyl groups	---	-1.99
180909_at	C32H11.4	hypothetical protein /// status:Confirmed	---	---	---	2.44
180913_at	aqp-1	AQuaPorin or aquaglyceroporin related	transport /// determination of adult life span	transporter activity	membrane /// integral to membrane	34.79
180914_at	nlp-35	Neuropeptide-Like Protein /// locus:nlp-35	---	---	integral to membrane	-3.89
180917_at	W02D7.4	hypothetical protein /// status:Partially_confirmed	---	---	---	-2.11
180945_s_at	F49C12.7	hypothetical protein	---	---	---	-2
180946_at	ilys-3	Invertebrate LYSozyme /// locus:ilys-3	---	lysozyme activity	---	-10.53
180948_at	F52E1.5	hypothetical protein /// status:Partially_confirmed	---	---	---	-2.27
180956_at		status:Partially_confirmed /// hypothetical protein	---	---	integral to membrane	-2.3
180965_at	W04B5.1	hypothetical protein /// status:Confirmed	---	---	---	-3.91
180966_s_at	W04B5.1	hypothetical protein /// status:Confirmed	---	---	---	-6.59
180969_s_at	T04C9.1	hypothetical protein	signal transduction	---	intracellular	1.82
180976_s_at	cbd-1	Chitin-Binding Domain protein /// locus:cbd-1	reproduction /// chitin metabolic process /// embryonic development ending in birth or egg hatching	protein binding /// chitin binding	extracellular region	2.22
180977_at	E02H9.2	hypothetical protein /// status:Predicted	---	---	---	-1.95
180988_at		status:Predicted /// hypothetical protein	---	---	integral to membrane	-1.92
180990_at	F14B8.4	hypothetical protein /// status:Partially_confirmed	embryonic development ending in birth or egg hatching	---	integral to membrane	-2.11
181002_at	F42A9.8	hypothetical protein /// status:Partially_confirmed	---	---	---	-1.89
181007_at	F53A9.7	hypothetical protein /// status:Confirmed	---	---	---	-2.92
181010_s_at	ogt-1	O-Linked GlcNAc Transferase	energy reserve metabolic process /// protein amino acid O-linked glycosylation /// positive regulation of growth rate /// dauer larval development	binding /// protein N-acetylglucosaminyltransferase activity /// transferase activity /// transferase activity, transferring glycosyl groups	nucleus /// nucleus /// cytoplasm	1.98
181020_at	rod-1	ROD (Drosophila RoughDeal) homolog /// locus:rod-1	embryonic development ending in birth or egg hatching	---	---	2.06
181028_at		status:Partially_confirmed /// hypothetical protein	---	---	integral to membrane	2.87
181039_at	T16G12.6	hypothetical protein /// status:Partially_confirmed	---	binding	---	1.91
181041_at	F09F9.3	hypothetical protein /// status:Partially_confirmed	---	---	integral to membrane	-6.64
181051_at	T19D7.6	hypothetical protein /// status:Partially_confirmed	---	---	---	-2.66
181058_at		status:Partially_confirmed /// hypothetical protein	vitelline membrane formation	structural constituent of vitelline membrane	---	1.89
181059_at	F54G2.2	hypothetical protein /// status:Predicted	proteolysis	nucleic acid binding /// aspartic-type endopeptidase activity /// zinc ion binding	---	-1.82
181068_at	F31B12.2	hypothetical protein	---	---	---	-2.23
181097_at	T21H3.1	hypothetical protein	lipid metabolic process	triacylglycerol lipase activity	---	-1.81
181117_at	F14B8.2	hypothetical protein /// status:Partially_confirmed	---	---	integral to membrane	-2.44
181122_at	F23F1.7	hypothetical protein /// status:Partially_confirmed	---	---	---	-2.17
181129_at	B0507.6	hypothetical protein /// status:Partially_confirmed	---	---	---	-2.65
181136_s_at	noah-2	NOmpA Homolog (Drosophila nompA: no mechanoreceptor potential A) /// locus:noah-2	reproduction /// nematode larval development /// embryonic development ending in birth or egg hatching /// molting cycle, collagen and cuticulin-based cuticle /// growth /// locomotion	---	integral to membrane	1.97
181138_at	F54F12.2	hypothetical protein	---	---	integral to membrane	-1.89
181152_at	spp-2spp-3	SaPosin-like Protein family /// SaPosin-like Protein family /// locus:spp-2 /// locus:spp-3	---	---	---	-2.11
181158_s_at	T07H6.5	hypothetical protein /// status:Partially_confirmed	---	---	---	-2.18
181163_at	srw-71	Serpentine Receptor, class W /// locus:srw-71	---	receptor activity	integral to membrane	-1.87
181169_at	T16G12.4	hypothetical protein /// status:Partially_confirmed	---	---	integral to membrane	-2.2
181172_s_at	tbc-7	TBC (Tre-2/Bub2/Cdc16) domain family	regulation of Rab GTPase activity	Rab GTPase activator activity	intracellular	-2.19
181173_at	F26G1.3	hypothetical protein /// status:Partially_confirmed	---	---	---	-2.14
181196_at	T05A10.6	hypothetical protein /// status:Confirmed	---	---	---	-2.63
181199_at	C18H7.1	hypothetical protein /// status:Confirmed	---	---	integral to membrane	5
181202_at	F26G1.2	hypothetical protein	---	---	---	-2.62
181203_at		status:Partially_confirmed /// hypothetical protein	reproduction	---	---	-3.35
181206_at	---	---	---	---	---	2.97
181213_s_at	hcp-4	HoloCentric chromosome binding Protein /// locus:hcp-4	reproduction /// mitotic sister chromatid segregation /// cytokinesis /// mitotic spindle organization /// mitotic metaphase plate congression /// embryonic development ending in birth or egg hatching /// cell division /// attachment of spindle microtubules to chromosome /// kinetochore assembly	---	---	1.88
181216_s_at		status:Partially_confirmed /// hypothetical protein	---	---	---	-2.02
181220_at	C53B7.2	hypothetical protein /// status:Confirmed	---	---	---	-2.47
181234_at	C39B10.3	hypothetical protein /// status:Predicted	---	---	---	-2.66
181272_s_at	C18H2.2	hypothetical protein /// status:Partially_confirmed	---	---	---	3.16
181282_at	W03G11.2	hypothetical protein /// status:Confirmed	---	---	membrane /// integral to membrane	-2.17
181308_s_at	nas-9	Nematode AStacin protease	proteolysis /// embryonic development ending in birth or egg hatching	metalloendopeptidase activity /// peptidase activity /// metallopeptidase activity /// zinc ion binding /// hydrolase activity /// metal ion binding	extracellular region	-2.68
181311_s_at	F49C12.9	hypothetical protein /// status:Confirmed	---	---	---	2.57
181315_at	K02E11.3	hypothetical protein /// status:Confirmed	metabolic process	transferase activity, transferring hexosyl groups	---	-2.15
181329_s_at	dao-5	Dauer or Aging adult Overexpression	insulin receptor signaling pathway /// determination of adult life span /// dauer larval development	signal transducer activity	---	2.52
181331_s_at	K09C6.7	hypothetical protein /// hypothetical protein /// status:Confirmed /// status:Partially_confirmed	---	---	---	1.9
181331_s_at	K09C6.8	hypothetical protein /// hypothetical protein /// status:Confirmed /// status:Partially_confirmed	---	---	---	1.9
181336_at	fbxc-54	F-box C protein /// locus:fbxc-54	---	---	---	-2.41
181343_at	C17F4.3	hypothetical protein /// status:Confirmed	---	---	---	-2.03
181353_s_at		status:Partially_confirmed /// hypothetical protein	---	---	---	3.24
181391_at	C08G5.6	hypothetical protein /// status:Partially_confirmed	---	---	integral to membrane	-2.16
181393_at	F17C11.13F17C11.6	hypothetical protein /// hypothetical protein /// status:Confirmed /// status:Confirmed	---	---	integral to membrane	-2.01
181436_at	F40A3.2	hypothetical protein /// status:Confirmed	---	---	integral to membrane	-2.46
181439_at	dsh-2	DiSHevelled related /// locus:dsh-2	reproduction /// morphogenesis of an epithelium /// nematode larval development /// multicellular organismal development /// embryonic development ending in birth or egg hatching /// body morphogenesis /// growth /// positive regulation of growth rate /// locomotion /// hermaphrodite genitalia development	signal transducer activity /// protein binding /// protein binding	intracellular	1.93
181441_s_at	T01D1.3	hypothetical protein /// status:Confirmed	---	---	---	-1.81
181445_s_at	ksr-2	Kinase Suppressor of activated Ras	protein amino acid phosphorylation /// intracellular signaling cascade	protein kinase activity /// protein serine/threonine kinase activity /// protein tyrosine kinase activity /// ATP binding /// zinc ion binding /// metal ion binding	---	2.12
181446_s_at	stip-1	STIP (Septin and Tuftelin Interacting Protein) homolog	nematode larval development /// mRNA processing /// RNA splicing /// embryonic development /// embryonic development ending in birth or egg hatching /// growth /// locomotion /// hermaphrodite genitalia development	nucleic acid binding /// protein binding	intracellular /// nucleus /// spliceosome /// spliceosome	1.85
181447_at	math-38	MATH (meprin-associated Traf homology) domain containing	---	---	---	-2.93
181449_at	clec-21	C-type LECtin /// locus:clec-21	---	binding /// sugar binding	---	-1.82
181459_at	F49H6.13	hypothetical protein /// status:Partially_confirmed	---	---	integral to membrane	-5.65
181460_at	lgc-32	Ligand-Gated ion Channel /// locus:lgc-32	---	---	integral to membrane	-1.82
181462_at	W03D8.8	hypothetical protein /// status:Partially_confirmed	lipid metabolic process /// acyl-CoA metabolic process	protein binding /// palmitoyl-CoA hydrolase activity /// thiolester hydrolase activity	---	3.31
181475_at	spp-20	SaPosin-like Protein family /// locus:spp-20	lipid metabolic process	---	---	-5.22
181485_s_at		status:Confirmed /// hypothetical protein	reproduction /// nematode larval development /// rRNA processing /// embryonic development ending in birth or egg hatching /// growth /// positive regulation of growth rate /// hermaphrodite genitalia development	---	nucleus	2.26
181488_at	F36A2.14	hypothetical protein /// status:Partially_confirmed	---	---	---	-3.34
181494_s_at	T07C4.3	hypothetical protein	---	protein binding	---	1.93
181498_s_at	Y48B6A.6	hypothetical protein	---	calcium ion binding	---	-1.97
181520_at	rhy-1	Regulator of HYpoxia-inducible factor (hif-1) /// locus:rhy-1	---	transferase activity, transferring acyl groups other than amino-acyl groups	integral to membrane	-2.84
181532_at	nmgp-1	Neuronal Membrane GlycoProtein /// locus:nmgp-1	---	---	integral to membrane	-1.89
181535_at		status:Partially_confirmed /// hypothetical protein	reproduction /// morphogenesis of an epithelium /// nematode larval development /// growth /// positive regulation of growth rate /// locomotion /// positive regulation of multicellular organism growth /// hermaphrodite genitalia development	---	---	2.38
181536_at	F52B11.5	hypothetical protein /// status:Confirmed	---	---	---	-2.09
181539_at	F16B4.2	hypothetical protein	---	---	---	-2.33
181555_at	valv-1	VALVe cells defective /// locus:valv-1	cellular process /// oviposition /// digestive system process	protein binding /// zinc ion binding	---	-3.09
181563_at	C13A2.9	hypothetical protein /// status:Partially_confirmed	---	---	integral to membrane	-4.22
181570_at	pqn-16	Prion-like-(Q/N-rich)-domain-bearing protein /// locus:pqn-16	---	---	---	-1.84
181586_at	F42C5.3	hypothetical protein /// status:Partially_confirmed	positive regulation of growth rate	---	---	-8.51
181587_at	R01H10.4	hypothetical protein /// status:Confirmed	---	---	---	-4.65
181599_at	fbxb-19	F-box B protein /// locus:fbxb-19	---	---	---	-1.83
181617_at	fbxa-201	F-box A protein /// locus:fbxa-201	---	---	---	-2.45
181625_s_at	W09C3.7	hypothetical protein /// status:Confirmed	---	---	---	-2.33
181629_at	C31B8.4	hypothetical protein /// status:Partially_confirmed	---	---	---	-3.07
181632_at	B0281.3	hypothetical protein /// status:Partially_confirmed	---	protein binding /// zinc ion binding	intracellular	-1.97
181654_at	K12H6.4	hypothetical protein /// status:Confirmed	---	---	---	-19.25
181661_at	---	---	---	---	---	-2.31
181664_at	R07E4.1	hypothetical protein	signal transduction	---	---	1.94
181665_at		status:Partially_confirmed /// hypothetical protein	---	---	integral to membrane	-1.95
181677_at	fkh-8	ForKHead transcription factor family /// locus:fkh-8	regulation of transcription, DNA-dependent	DNA binding /// transcription factor activity /// sequence-specific DNA binding	nucleus	-1.89
181681_at	spp-13	SaPosin-like Protein family /// locus:spp-13	---	---	integral to membrane	-2.63
181692_at	F44F4.10	hypothetical protein /// status:Partially_confirmed	---	---	---	-2.33
181695_at	C49G7.12	hypothetical protein /// status:Confirmed	---	---	---	-4.36
181697_at	fbxa-163	F-box A protein /// locus:fbxa-163	positive regulation of growth rate	---	---	-8.53
181699_at	fbxb-26	F-box B protein /// locus:fbxb-26	---	---	---	-2.06
181700_at	T25B6.5	hypothetical protein /// status:Predicted	---	---	---	-1.84
181708_s_at	ani-2	ANIllin (actin binding protein) /// locus:ani-2	reproduction /// multicellular organismal development /// gonad development /// embryonic development ending in birth or egg hatching /// body morphogenesis /// cell differentiation /// multicellular organism reproduction /// negative regulation of multicellular organism growth /// oogenesis /// oogenesis	---	---	2.09
181742_s_at	ZC328.3	hypothetical protein	embryonic development ending in birth or egg hatching	---	integral to membrane	1.91
181754_at	C30G4.5	hypothetical protein /// status:Partially_confirmed	---	---	---	1.89
181755_at	srz-19	Serpentine Receptor, class Z /// locus:srz-19	---	receptor activity	integral to membrane	-2.78
181761_at	sfxn-1.4	SideroFleXiN (mitochondrial iron transporter) /// locus:sfxn-1.4	cation transport	cation transmembrane transporter activity	membrane /// integral to membrane	-1.81
181778_at	T14G10.8	hypothetical protein /// status:Confirmed	---	---	---	1.93
181798_at	C25H3.8	hypothetical protein /// status:Partially_confirmed	reproduction /// nematode larval development /// protein localization /// coenzyme A metabolic process /// positive regulation of growth rate /// locomotion	hydroxymethylglutaryl-CoA reductase (NADPH) activity /// coenzyme binding	---	2.5
181801_at	D1022.4	hypothetical protein /// status:Confirmed	---	hydrolase activity	---	-2.03
181821_at	F20A1.6	hypothetical protein	---	---	integral to membrane	-4.67
181822_at	D1022.2	hypothetical protein /// status:Partially_confirmed	---	---	integral to membrane	-3.3
181827_at	F45E1.3	hypothetical protein /// status:Partially_confirmed	metabolic process	catalytic activity	integral to membrane	-3.47
181829_at	C43H8.1helicase	hypothetical protein /// hypothetical protein /// helicase /// status:Confirmed	reproduction /// nematode larval development /// growth /// hermaphrodite genitalia development	nucleic acid binding /// helicase activity /// ATP binding /// ATP-dependent helicase activity	---	-1.96
181848_at	F25G6.2	symk-1	nematode larval development /// embryonic development ending in birth or egg hatching /// growth	---	---	2.41
181857_at	C06E4.8	hypothetical protein /// status:Predicted	---	---	---	-2.45
181860_s_at		status:Partially_confirmed /// hypothetical protein	---	---	---	-2.78
181869_at	C34B2.4	hypothetical protein /// status:Partially_confirmed	meiotic chromosome segregation	zinc ion binding	---	-2.85
181874_at	W03F8.6	hypothetical protein	---	---	integral to membrane	-2.74
181900_at	T05A8.3	hypothetical protein /// status:Confirmed	---	---	---	-2.07
181912_at	F58H10.1	hypothetical protein /// status:Confirmed	---	---	---	-1.83
181929_at	F09C6.10	hypothetical protein /// status:Confirmed	embryonic development ending in birth or egg hatching	---	---	-1.94
181930_at		status:Partially_confirmed /// hypothetical protein	---	---	---	-20.3
181931_at	npp-6	Nuclear Pore complex Protein	nematode larval development /// embryonic development ending in birth or egg hatching /// growth	---	---	2.33
181935_s_at	ril-2	RNAi-Induced Longevity	reproduction /// nematode larval development /// embryonic development ending in birth or egg hatching /// growth /// positive regulation of growth rate	---	---	1.8
181945_s_at	btb-18	BTB (Broad/complex/Tramtrack/Bric a brac) domain protein /// locus:btb-18	---	protein binding	integral to membrane	-2.48
181955_at	K04B12.3	hypothetical protein /// status:Partially_confirmed	---	---	---	2.03
181966_s_at	K02F6.7	hypothetical protein /// status:Partially_confirmed	---	---	---	1.83
181967_at	flp-24	FMRF-Like Peptide /// locus:flp-24	neuropeptide signaling pathway /// embryonic development ending in birth or egg hatching	---	extracellular region /// integral to membrane	-2.02
181978_at	F10E7.1	hypothetical protein /// status:Partially_confirmed	---	---	---	-2.34
181984_at	brc-1	BRCa homolog (tumor suppressor gene Brca1) /// hypothetical protein /// status:Predicted	double-strand break repair via homologous recombination /// DNA repair /// DNA repair /// apoptosis /// response to DNA damage stimulus /// cell death /// positive regulation of growth rate /// meiotic chromosome segregation /// meiotic chromosome separation	DNA binding /// protein binding /// zinc ion binding	intracellular /// nucleus	1.82
181990_at	F22G12.7	hypothetical protein /// status:Predicted	---	---	---	-5.31
182067_at	rmd-5	Regulator of Microtubule Dynamics /// locus:rmd-5	---	---	---	-2.3
182081_s_at	E01A2.10K05F6.11	hypothetical protein /// hypothetical protein /// status:Partially_confirmed /// status:Confirmed	---	arylesterase activity	integral to membrane	2.04
182085_at	C23H3.9	hypothetical protein	---	hydrolase activity	integral to membrane	1.87
182088_s_at	F57F4.4	hypothetical protein /// status:Partially_confirmed	positive regulation of growth rate	---	---	-22.71
182089_at	nfya-2	Nuclear transcription Factor Y, A (alpha) subunit /// locus:nfya-2	regulation of transcription, DNA-dependent	transcription factor activity	nucleus	1.8
182095_at	K07H8.7	hypothetical protein /// status:Predicted	---	---	integral to membrane	2.23
182096_at	dnj-4	DNaJ domain (prokaryotic heat shock protein) /// locus:dnj-4	protein folding /// response to stress	heat shock protein binding /// unfolded protein binding	integral to membrane	1.96
182099_at	C47D12.5	hypothetical protein /// status:Partially_confirmed	---	---	integral to membrane	-2.21
182104_at		status:Confirmed /// hypothetical protein	---	---	integral to membrane	4.26
182119_at	fbxb-98	F-box B protein /// locus:fbxb-98	---	---	integral to membrane	-1.8
182121_at	F11C7.2	hypothetical protein /// status:Confirmed	---	---	---	-1.94
182131_s_at	F29D11.2	hypothetical protein /// status:Partially_confirmed	reproduction /// nematode larval development /// embryonic development ending in birth or egg hatching /// body morphogenesis /// growth /// positive regulation of growth rate /// locomotion /// negative regulation of multicellular organism growth /// positive regulation of locomotion /// positive regulation of multicellular organism growth /// hermaphrodite genitalia development	binding	---	1.88
182143_s_at	grl-4	GRound-Like (grd related) /// locus:grl-4	positive regulation of growth rate	structural constituent of cell wall /// electron carrier activity /// oxidoreductase activity /// nutrient reservoir activity	---	-1.99
182155_at	rom-1	RhOMboid (Drosophila) related /// locus:rom-1	signal transduction	serine-type endopeptidase activity /// peptidase activity /// serine-type peptidase activity /// hydrolase activity	membrane /// integral to membrane	-1.82
182167_at	gld-2	defective in Germ Line Development	reproduction /// morphogenesis of an epithelium /// mRNA processing /// nucleus organization /// meiosis /// multicellular organismal development /// embryonic development ending in birth or egg hatching /// positive regulation of growth rate /// regulation of meiosis /// hermaphrodite genitalia development /// regulation of cell proliferation /// regulation of cell division	polynucleotide adenylyltransferase activity /// protein binding /// transferase activity	cytoplasm	2.15
182168_at	F21E9.6	hypothetical protein /// status:Predicted	---	---	---	-2.4
182177_at	F40G9.7	hypothetical protein /// status:Partially_confirmed	---	---	---	-1.8
182196_s_at		locus:dcaf-1 /// hypothetical protein	reproduction /// morphogenesis of an epithelium /// embryonic development ending in birth or egg hatching /// positive regulation of growth rate /// hermaphrodite genitalia development	binding	---	2.34
182267_at	---	---	---	---	---	-3.02
182274_at	K08D9.4	hypothetical protein /// status:Partially_confirmed	---	---	---	2.3
182277_at	math-34	MATH (meprin-associated Traf homology) domain containing	---	---	---	-2.35
182278_s_at	math-34	MATH (meprin-associated Traf homology) domain containing	---	---	---	-2.34
182282_s_at	F59A3.5	hypothetical protein /// hypothetical protein /// status:Confirmed /// status:Confirmed	---	---	---	1.84
182282_s_at	F59A3.6	hypothetical protein /// hypothetical protein /// status:Confirmed /// status:Confirmed	---	---	---	1.84
182288_at	F18E9.7	hypothetical protein /// status:Partially_confirmed	---	---	---	-2.23
182307_at	srv-5	Serpentine Receptor, class V	---	receptor activity	integral to membrane	-2.2
182312_at	gak-1	Germline-enhanced AT-HooK protein /// locus:xnd-1	reproduction	DNA binding /// protein binding	nucleus	2.45
182317_at	C36C9.1	hypothetical protein /// status:Partially_confirmed	---	protein binding	---	2.03
182318_s_at	gei-12	GEX Interacting protein /// locus:gei-12	embryonic development ending in birth or egg hatching	protein binding	---	2.38
182343_at	F15A8.7	hypothetical protein /// status:Partially_confirmed	---	---	---	-1.84
182348_at	fbxa-12	F-box A protein /// locus:fbxa-12	---	---	---	-4.24
182355_at	K08D9.2	hypothetical protein /// status:Partially_confirmed	---	---	integral to membrane	-3.64
182357_at	nlp-26	Neuropeptide-Like Protein /// locus:nlp-26	---	---	---	1.93
182384_at	ins-31	INSulin related /// locus:ins-31	---	hormone activity	extracellular region	-3.53
182387_at		status:Confirmed /// hypothetical protein	---	---	---	-2.26
182390_at	D1007.4	hypothetical protein /// status:Partially_confirmed	---	---	---	-1.86
182395_at	grl-23	GRound-Like (grd related) /// locus:grl-23	---	---	integral to membrane	-11.63
182409_s_at	vap-1	Venom-Allergen-like Protein	---	---	extracellular region	-1.84
182410_at	T10E9.4	hypothetical protein /// status:Partially_confirmed	---	---	integral to membrane	1.91
182411_at	fbxa-107	F-box A protein /// locus:fbxa-107	---	---	---	-2.01
182419_at	fbxa-203	F-box A protein /// locus:fbxa-203	---	---	---	2
182439_at		status:Confirmed /// hypothetical protein	---	---	---	-4.77
182440_s_at	chtl-1	CHoline Transporter-Like	reproduction /// morphogenesis of an epithelium /// nematode larval development /// collagen and cuticulin-based cuticle development /// growth /// hermaphrodite genitalia development	---	integral to membrane	3.06
182444_at	F18G5.6	hypothetical protein /// status:Confirmed	---	---	---	-2.28
182448_at	F48B9.2	hypothetical protein /// status:Partially_confirmed	---	---	integral to membrane	-1.85
182452_at	B0336.3	hypothetical protein /// status:Partially_confirmed	body morphogenesis /// positive regulation of growth rate	nucleotide binding /// nucleic acid binding /// zinc ion binding /// metal ion binding	---	2.1
182455_at	oac-24	O-ACyltransferase homolog /// locus:oac-24	---	transferase activity, transferring acyl groups other than amino-acyl groups	integral to membrane	-1.82
182460_at	---	---	---	---	---	-1.94
182465_at		status:Partially_confirmed /// hypothetical protein	---	---	---	-2.19
182468_s_at	K05F1.6	hypothetical protein	transport	transporter activity	membrane /// integral to membrane	2.07
182471_at	tag-299	Temporarily Assigned Gene name /// locus:tag-299	---	---	integral to membrane	-2.8
182474_at		status:Partially_confirmed /// hypothetical protein	reproduction /// nuclear mRNA splicing, via spliceosome /// nematode larval development /// RNA processing /// embryonic development ending in birth or egg hatching /// molting cycle, collagen and cuticulin-based cuticle /// growth /// positive regulation of growth rate /// locomotion /// negative regulation of multicellular organism growth	binding	intracellular /// nucleus	1.92
182479_at	B0454.5	hypothetical protein /// status:Confirmed	---	---	integral to membrane	-2.08
182480_at	K10D11.3	hypothetical protein /// status:Partially_confirmed	---	---	---	-2.32
182484_at	nlp-5	Neuropeptide-Like Protein /// locus:nlp-5	---	---	---	-2.28
182486_at	E04F6.8	hypothetical protein /// status:Confirmed	---	---	---	-2.25
182490_at		status:Partially_confirmed /// hypothetical protein	---	---	---	-1.99
182491_at	F53F4.13	hypothetical protein /// status:Confirmed	---	---	integral to membrane	-3.41
182492_at	math-14	MATH (meprin-associated Traf homology) domain containing /// locus:math-14	---	protein binding	---	1.91
182506_at	F58G11.4	hypothetical protein /// status:Partially_confirmed	---	---	integral to membrane	-1.93
182508_at	F10G2.1	hypothetical protein /// status:Partially_confirmed	---	---	membrane /// integral to membrane	-1.9
182509_at	F40F11.2	hypothetical protein	cellular amine metabolic process /// embryonic development ending in birth or egg hatching	copper ion binding /// amine oxidase activity /// quinone binding	---	1.95
182515_at	F13B9.2	hypothetical protein /// status:Partially_confirmed	---	---	---	-1.89
182525_at	pqn-84	Prion-like-(Q/N-rich)-domain-bearing protein /// locus:pqn-84	morphogenesis of an epithelium	sugar binding	---	-1.87
182534_at		status:Partially_confirmed /// hypothetical protein	---	---	---	-2.46
182538_at	C15H9.4	hypothetical protein /// status:Partially_confirmed	positive regulation of growth rate	protein binding	integral to membrane	2.02
182545_at	clec-223	C-type LECtin /// locus:clec-223	---	binding	---	4.21
182551_s_at	phat-6	PHAryngeal gland Toxin-related /// locus:phat-6	---	---	---	-2
182552_at	ttr-35	TransThyretin-Related family domain /// locus:ttr-35	---	---	---	-2.24
182553_at	C54D10.3	hypothetical protein /// status:Confirmed	---	---	---	-3.15
182574_at		status:Partially_confirmed /// hypothetical protein	---	---	---	1.86
182579_at	fbxa-164	F-box A protein /// locus:fbxa-164	translation	structural constituent of ribosome	intracellular /// ribosome	-3.8
182582_at	srh-173	Serpentine Receptor, class H /// locus:srh-173	---	---	integral to membrane	-1.93
182597_at	T07E3.4	hypothetical protein	---	---	---	-2.16
182609_at	B0496.6	hypothetical protein /// status:Partially_confirmed	---	---	integral to membrane	-2.09
182628_s_at	T21F4.1	hypothetical protein /// status:Confirmed	arginine metabolic process	arginase activity /// hydrolase activity /// hydrolase activity, acting on carbon-nitrogen (but not peptide) bonds, in linear amidines /// metal ion binding	---	-3.66
182649_at	srv-11	Serpentine Receptor, class V /// locus:srv-11	---	---	integral to membrane	-2.5
182653_at	R07E4.3	hypothetical protein /// status:Confirmed	---	ubiquinol-cytochrome-c reductase activity	---	-2.76
182654_at	dct-3	DAF-16/FOXO Controlled, germline Tumor affecting /// locus:dct-3	---	---	---	-1.97
182657_s_at	npp-3	Nuclear Pore complex Protein /// locus:npp-3	establishment of mitotic spindle orientation /// morphogenesis of an epithelium /// embryonic development ending in birth or egg hatching /// locomotion	---	---	2.16
182688_at		status:Partially_confirmed /// hypothetical protein	---	---	---	-1.82
182691_s_at	C36A4.5F25D7.4	claustrin like	---	---	integral to membrane	2.59
182697_s_at	F53C11.5	hypothetical protein	---	protein binding	---	1.85
182700_at	C49G7.1	hypothetical protein /// status:Partially_confirmed	---	---	intracellular /// integral to membrane	-1.94
182708_s_at		status:Confirmed /// hypothetical protein	positive regulation of growth rate	---	---	2.23
182726_s_at	srbc-61srbc-62	Serpentine Receptor, class BC (class B-like) /// Serpentine Receptor, class BC (class B-like) /// locus:srbc-61 /// locus:srbc-62	---	---	integral to membrane	-1.91
182747_at	R08E5.3	hypothetical protein /// status:Confirmed	metabolic process	methyltransferase activity	---	-2.19
182770_at	D2096.5	hypothetical protein /// status:Partially_confirmed	---	---	integral to membrane	-1.96
182772_at	F48G7.2	hypothetical protein /// status:Partially_confirmed	---	---	---	-5.47
182793_at	C11G10.1	hypothetical protein /// status:Confirmed	---	---	integral to membrane	-2.04
182798_at	T04A6.1	hypothetical protein	---	---	integral to membrane	-2.29
182806_at	sru-37	Serpentine Receptor, class U /// locus:sru-37	---	---	integral to membrane	-2.23
182808_s_at	F55B11.4	hypothetical protein /// status:Confirmed	---	zinc ion binding	intracellular	-2.18
182814_at	prg-2	Piwi (fruitfly) Related Gene /// locus:prg-2	embryonic development ending in birth or egg hatching	nucleic acid binding	---	3.58
182815_at	T24C4.4	hypothetical protein /// status:Confirmed	---	---	integral to membrane	-2.39
182822_s_at	ntl-2	NOT-Like (yeast CCR4/NOT complex component)	reproduction /// morphogenesis of an epithelium /// nematode larval development /// determination of adult life span /// embryonic development ending in birth or egg hatching /// growth /// positive regulation of growth rate /// locomotion /// positive regulation of multicellular organism growth /// hermaphrodite genitalia development /// regulation of transcription	protein binding /// transcription regulator activity /// identical protein binding	nucleus	2.38
182828_at	F10G2.4	hypothetical protein /// status:Partially_confirmed	---	---	---	-1.93
182836_at	C29G2.6	hypothetical protein /// status:Confirmed	---	---	membrane /// integral to membrane	-2.56
182838_s_at	T05E12.3	hypothetical protein /// status:Confirmed	potassium ion transport	voltage-gated potassium channel activity /// protein binding	voltage-gated potassium channel complex /// membrane	-3.98
182844_s_at	anc-1	abnormal nuclear ANChorage /// locus:anc-1	nematode larval development /// cytoskeleton organization /// embryonic development ending in birth or egg hatching /// molting cycle, collagen and cuticulin-based cuticle /// growth /// positive regulation of growth rate /// localization	actin binding	nucleus /// nuclear outer membrane /// cytoplasm /// cytoskeleton /// membrane /// integral to membrane	3.3
182847_at	---	---	---	---	---	2.15
182852_at	F57F4.2	hypothetical protein /// status:Partially_confirmed	---	---	integral to membrane	-5.5
182858_at	T15B7.1	hypothetical protein /// status:Confirmed	signal transduction /// embryonic development ending in birth or egg hatching	receptor binding /// binding	---	-1.96
182895_at	nhr-109	Nuclear Hormone Receptor family	transcription /// regulation of transcription, DNA-dependent	DNA binding /// transcription factor activity /// steroid hormone receptor activity /// receptor activity /// ligand-dependent nuclear receptor activity /// zinc ion binding /// sequence-specific DNA binding /// metal ion binding	nucleus	-1.86
182901_at	F20A1.8	hypothetical protein /// status:Partially_confirmed	---	---	---	-3.38
182904_at	W03D2.6	hypothetical protein /// status:Partially_confirmed	---	---	integral to membrane	-3.55
182905_at	cpin-1	CyPIN (guanine aminohydrolase) homolog) /// locus:cpin-1	---	hydrolase activity /// hydrolase activity, acting on carbon-nitrogen (but not peptide) bonds	---	-2
182946_at	fbxa-145	F-box A protein /// locus:fbxa-145	embryonic development ending in birth or egg hatching	---	integral to membrane	-2.03
182947_at		status:Partially_confirmed /// hypothetical protein	---	---	---	1.84
182950_at	T23B3.2	hypothetical protein /// status:Confirmed	---	---	integral to membrane	-2.79
182960_at	hlh-13	Helix Loop Helix /// locus:hlh-13	nematode larval development /// embryonic development ending in birth or egg hatching /// growth /// locomotion /// regulation of transcription	transcription regulator activity	nucleus	-4.31
182962_at	F40H3.2	hypothetical protein /// status:Confirmed	---	protein binding	---	-1.87
182963_at	F23D12.1	hypothetical protein /// status:Confirmed	---	---	integral to membrane	-3.8
182964_s_at	ergo-1	Endogenous-RNAi deficient arGOnaute /// locus:ergo-1	---	nucleic acid binding	---	2.14
182967_at	nlp-7	Neuropeptide-Like Protein /// locus:nlp-7	neuropeptide signaling pathway	---	integral to membrane	-2.06
182974_at	T01C8.3	hypothetical protein /// status:Partially_confirmed	---	---	---	-2.01
182980_at	T08B1.4	hypothetical protein	---	---	---	-2.81
183002_at	grl-19	GRound-Like (grd related) /// locus:grl-19	---	---	---	-14.41
183004_at		status:Partially_confirmed /// hypothetical protein	---	zinc ion binding	intracellular	-1.9
183007_at	F59A7.5	hypothetical protein	---	---	---	-1.8
183018_at	F16B4.7	hypothetical protein /// status:Partially_confirmed	---	---	---	-2.28
183022_at	T25B6.3	hypothetical protein /// status:Partially_confirmed	---	---	---	-2.83
183030_at	C16C8.7	hypothetical protein /// status:Predicted	---	---	---	-2.57
183034_at	C16C8.8	hypothetical protein /// status:Predicted	---	---	---	-1.82
183037_at	reps-1	REPS (RalBP1-associated Eps domain-containing protein) homolog /// locus:reps-1	---	calcium ion binding	---	1.88
183048_at	T17A3.2	hypothetical protein /// status:Confirmed	---	---	---	-1.96
183052_at	C32H11.1	hypothetical protein /// status:Partially_confirmed	---	---	---	-2.07
183055_at		status:Confirmed /// hypothetical protein	histidine catabolic process /// carbohydrate catabolic process	catalytic activity /// dopamine beta-monooxygenase activity /// carbohydrate binding	---	-6.84
183056_at	T17A3.9	hypothetical protein	---	---	---	-2.2
183073_at		status:Predicted /// hypothetical protein	---	---	membrane	-1.86
183076_at	T15B7.1	hypothetical protein /// status:Confirmed	signal transduction /// embryonic development ending in birth or egg hatching	receptor binding /// binding	---	-2.12
183082_s_at	pqn-65	Prion-like-(Q/N-rich)-domain-bearing protein	---	---	---	3.22
183084_at	C54D10.8	hypothetical protein /// status:Confirmed	---	---	---	-18.19
183089_at	C15C7.5	hypothetical protein /// status:Confirmed	positive regulation of growth rate /// locomotion	---	---	-2.29
183099_s_at	E02H9.6W04B5.6	hypothetical protein /// hypothetical protein /// status:Predicted /// status:Predicted	---	---	integral to membrane	1.96
183106_at	F32B5.3	hypothetical protein /// status:Predicted	---	---	integral to membrane	-2.04
183110_at	F25B4.8	hypothetical protein	metabolic process	carbon-sulfur lyase activity	---	-1.93
183125_at	F25E5.8	hypothetical protein	---	---	---	-2.25
183142_at	B0348.2	hypothetical protein /// status:Partially_confirmed	---	---	integral to membrane	-4.55
183154_at		status:Confirmed /// hypothetical protein	---	---	---	-2.2
183155_at	D2096.1	hypothetical protein /// status:Predicted	protein transport	protein transporter activity	mitochondrial inner membrane	-3.25
183160_at	C08A9.3	hypothetical protein /// status:Partially_confirmed	---	---	integral to membrane	-2.53
183169_s_at	F07B7.8K06C4.1	hypothetical protein /// hypothetical protein /// status:Predicted /// status:Predicted	---	---	---	-2.73
183171_at	math-24	MATH (meprin-associated Traf homology) domain containing /// locus:math-24	---	---	---	-2.91
183178_at	T22E5.1	hypothetical protein	---	---	integral to membrane	-2.4
183192_at	nhr-172	Nuclear Hormone Receptor family /// locus:nhr-172	transcription /// regulation of transcription, DNA-dependent	DNA binding /// transcription factor activity /// steroid hormone receptor activity /// receptor activity /// zinc ion binding /// sequence-specific DNA binding /// metal ion binding	nucleus	-1.91
183194_s_at	F08F3.6	hypothetical protein /// status:Confirmed	---	---	---	1.86
183206_at	F07C3.9	hypothetical protein /// status:Predicted	---	---	integral to membrane	-7.6
183208_at	F34D10.3	hypothetical protein /// status:Partially_confirmed	embryonic development ending in birth or egg hatching	---	integral to membrane	-2.06
183216_at		status:Predicted /// hypothetical protein	---	---	---	-1.93
183232_s_at	K01A2.3K01A2.4	hypothetical protein /// hypothetical protein /// status:Partially_confirmed /// status:Partially_confirmed	---	---	integral to membrane	1.81
183244_at	F58E10.1	hypothetical protein	---	---	---	1.84
183255_at	T22E5.6	hypothetical protein /// status:Partially_confirmed	response to oxidative stress	peroxidase activity /// heme binding	integral to membrane	-1.96
183268_at		status:Partially_confirmed /// hypothetical protein	---	---	---	-1.91
183273_at	C14C6.3	hypothetical protein /// status:Partially_confirmed	---	---	integral to membrane	2.1
183274_at	F28C6.10	hypothetical protein /// status:Confirmed	---	---	---	-3.5
183291_at	F56C9.3	hypothetical protein /// status:Confirmed	cation transport	cation transmembrane transporter activity	membrane /// integral to membrane	1.8
183294_at	F58F9.3	hypothetical protein	---	---	---	-2.04
183295_at	C09B8.5	hypothetical protein /// status:Partially_confirmed	embryonic development ending in birth or egg hatching	---	---	2.48
183297_at	T26A8.1	hypothetical protein /// status:Confirmed	---	---	integral to membrane	2.07
183307_at	F16B12.6	hypothetical protein /// status:Partially_confirmed	---	protein binding	---	2.56
183309_at	K03H6.2	hypothetical protein /// status:Partially_confirmed	lipid metabolic process	triacylglycerol lipase activity	---	-4.85
183324_at	K10D11.5	hypothetical protein /// status:Partially_confirmed	---	---	integral to membrane	-2.11
183328_at		status:Confirmed /// hypothetical protein	---	---	---	-1.86
183333_at	klp-10	Kinesin-Like Protein	cytokinesis /// microtubule-based movement /// embryonic development ending in birth or egg hatching /// meiotic chromosome segregation /// cell division	nucleotide binding /// microtubule motor activity /// ATP binding	microtubule associated complex	2.26
183335_at		status:Partially_confirmed /// hypothetical protein	---	---	integral to membrane	-3.24
183362_s_at	F55B11.2	hypothetical protein /// status:Confirmed	reproduction /// embryonic development ending in birth or egg hatching	---	---	-1.96
183371_at	F58E2.3	hypothetical protein /// status:Partially_confirmed	---	---	---	-2.01
183379_at	K01D12.9	hypothetical protein /// status:Confirmed	---	---	---	-1.99
183394_at	T26A8.3	hypothetical protein /// status:Partially_confirmed	---	---	---	-3.12
183396_s_at	farl-11	FAR (Factor ARrest) Like /// locus:farl-11	embryonic development ending in birth or egg hatching	protein binding	---	1.98
183416_s_at	tgt-2	TRNA Guanine Transglycosylase /// locus:tgt-2	tRNA modification /// queuosine biosynthetic process	queuine tRNA-ribosyltransferase activity	---	2.21
183426_at		status:Partially_confirmed /// hypothetical protein	proteolysis /// positive regulation of growth rate /// locomotion	metalloendopeptidase activity	membrane /// integral to membrane	2.8
183427_s_at		status:Partially_confirmed /// hypothetical protein	proteolysis /// positive regulation of growth rate /// locomotion	metalloendopeptidase activity	membrane /// integral to membrane	1.8
183438_s_at	nlp-20	Neuropeptide-Like Protein /// locus:nlp-20	neuropeptide signaling pathway /// embryonic development ending in birth or egg hatching	---	integral to membrane	-2.41
183442_at	K10D11.2	hypothetical protein /// status:Partially_confirmed	---	---	---	6.49
183450_at	clec-1	C-type LECtin /// locus:clec-1	morphogenesis of an epithelium /// nematode larval development /// body morphogenesis /// growth /// locomotion /// positive regulation of multicellular organism growth /// hermaphrodite genitalia development	binding	---	-3.37
183473_at	D2096.9	hypothetical protein /// status:Partially_confirmed	embryonic development ending in birth or egg hatching	---	integral to membrane	-1.88
183498_s_at	npp-12	Nuclear Pore complex Protein /// locus:npp-12	nematode larval development /// embryonic development ending in birth or egg hatching /// growth	---	integral to membrane	1.85
183526_at	C14C6.5	hypothetical protein /// status:Confirmed	---	---	---	-3.64
183527_s_at	C14C6.5	hypothetical protein /// status:Confirmed	---	---	---	-4.79
183534_at	fbxa-8	F-box A protein /// locus:fbxa-8	---	---	---	-2.59
183537_at	C03G6.6	hypothetical protein /// status:Partially_confirmed	---	---	integral to membrane	-5.33
183549_at	C49A9.5	hypothetical protein /// status:Confirmed	---	---	---	-2.14
183559_s_at	C27A7.6	hypothetical protein /// status:Partially_confirmed /// hypothetical protein /// hypothetical protein	transport	transporter activity	integral to membrane	2.2
183566_at	C14C6.2	hypothetical protein /// status:Confirmed	---	---	---	-2.04
183567_s_at	C14C6.2	hypothetical protein /// status:Confirmed	---	---	---	-3.04
183604_at	T08A11.2	hypothetical protein /// status:Partially_confirmed	reproduction /// nematode larval development /// determination of adult life span /// embryonic development ending in birth or egg hatching /// growth /// positive regulation of growth rate /// locomotion /// hermaphrodite genitalia development	binding	---	1.9
183611_at	C06A5.4	hypothetical protein /// status:Partially_confirmed	---	---	---	1.95
183624_at	dod-22	Downstream Of DAF-16 (regulated by DAF-16) /// locus:dod-22	determination of adult life span	---	---	-1.85
183631_at	fbxa-98	F-box A protein /// locus:fbxa-98	---	---	---	-2.1
183633_at	C49C3.15	hypothetical protein /// status:Partially_confirmed	---	---	---	-1.87
183639_at	F13A7.11	hypothetical protein /// status:Confirmed	---	---	---	-1.98
183641_at	F08B12.4	hypothetical protein	---	---	---	-1.91
183652_at	far-7	Fatty Acid/Retinol binding protein	---	lipid binding	---	-2
183653_at	F41D9.2	hypothetical protein	histidine catabolic process	dopamine beta-monooxygenase activity	---	-1.97
183664_at	F17E9.3	hypothetical protein /// status:Partially_confirmed	---	---	---	-1.96
183676_s_at	numr-1numr-2	NUclear localized Metal Responsive /// NUclear localized Metal Responsive /// locus:numr-2 /// locus:numr-1	---	protein binding	---	-5.51
183683_at	oig-3	One IG domain /// locus:oig-3	reproduction /// nematode larval development /// embryonic development ending in birth or egg hatching /// growth /// positive regulation of multicellular organism growth	---	---	-2.51
183684_at	K03E5.1	hypothetical protein /// status:Predicted	---	---	integral to membrane	-2.07
183694_at	ttr-20	TransThyretin-Related family domain /// locus:ttr-20	reproduction /// transcription /// transcription from RNA polymerase II promoter /// mitotic spindle organization /// embryonic development ending in birth or egg hatching /// positive regulation of growth rate	magnesium ion binding /// DNA binding /// DNA-directed RNA polymerase activity /// protein binding /// zinc ion binding /// transferase activity /// nucleotidyltransferase activity /// metal ion binding	nucleus /// DNA-directed RNA polymerase II, core complex /// integral to membrane	-1.85
183699_at	---	---	---	---	---	-1.91
183713_at	C24G7.2	hypothetical protein /// status:Partially_confirmed	transport /// ion transport /// sodium ion transport	ion channel activity /// sodium channel activity /// sodium ion binding	membrane /// integral to membrane	2.98
183714_at	F42G9.4	hypothetical protein /// status:Partially_confirmed	---	---	integral to membrane	-2.03
183721_at	F17E9.4	hypothetical protein /// status:Confirmed	---	---	integral to membrane	-2.8
183733_at	F44C8.7	hypothetical protein /// status:Confirmed	transport /// carbohydrate transport /// nucleotide-sugar transport	nucleotide-sugar transmembrane transporter activity /// sugar:hydrogen symporter activity /// protein binding	Golgi membrane /// membrane /// integral to membrane	-2.03
183744_at	F59A1.10	hypothetical protein /// status:Partially_confirmed	---	transferase activity, transferring acyl groups other than amino-acyl groups	integral to membrane	-2.42
183762_at	R02F2.7	hypothetical protein /// status:Partially_confirmed	reproduction /// nematode larval development /// growth /// positive regulation of growth rate /// hermaphrodite genitalia development	---	---	1.92
183773_at	K12B6.4	hypothetical protein /// status:Partially_confirmed	---	---	integral to membrane	-1.87
183774_s_at	K12H6.9	hypothetical protein /// status:Partially_confirmed	---	---	---	-14.91
183816_at	K09E2.2	hypothetical protein /// status:Partially_confirmed	---	---	---	1.88
183824_s_at	hif-1	HIF (hypoxia inducible factor) homolog	response to hypoxia /// transcription /// regulation of transcription, DNA-dependent /// signal transduction /// regulation of transcription	DNA binding /// signal transducer activity /// transcription regulator activity	nucleus	1.81
183828_at	C08F11.3	hypothetical protein /// status:Partially_confirmed	---	---	integral to membrane	-3.93
183861_at	W02D9.10	hypothetical protein /// status:Confirmed	---	---	---	-1.86
183878_at	F09F7.3	hypothetical protein /// status:Confirmed	reproduction /// nematode larval development /// transcription /// embryonic development ending in birth or egg hatching /// growth /// positive regulation of growth rate	DNA binding /// DNA-directed RNA polymerase activity /// ribonucleoside binding	---	2.2
183893_s_at	C08F1.6	hypothetical protein /// status:Confirmed	---	---	integral to membrane	-1.87
183895_at	nlp-25	Neuropeptide-Like Protein /// locus:nlp-25	---	protein binding	---	2.24
183912_at	T10C6.6	hypothetical protein	transport	transporter activity	integral to membrane	1.82
183957_s_at	let-711	LEThal /// locus:let-711	reproduction /// morphogenesis of an epithelium /// nematode larval development /// carbohydrate metabolic process /// determination of adult life span /// embryonic development ending in birth or egg hatching /// molting cycle, collagen and cuticulin-based cuticle /// spindle astral microtubule organization /// establishment of mitotic spindle localization /// growth /// locomotion	hydrolase activity, hydrolyzing O-glycosyl compounds	---	1.86
183963_at	C29F9.2	hypothetical protein /// status:Confirmed	---	---	---	-2.29
183970_at	T04C12.3	hypothetical protein /// status:Confirmed	---	---	---	-2.34
183973_at	F17E9.2	hypothetical protein /// status:Partially_confirmed	---	---	---	-2.87
183976_at	ntl-3	NOT-Like (yeast CCR4/NOT complex component)	nematode larval development /// embryonic development ending in birth or egg hatching /// growth /// hermaphrodite genitalia development /// regulation of transcription	transcription regulator activity	nucleus	-2.31
183989_at	fbxa-53	F-box A protein /// locus:fbxa-53	---	---	---	-2.83
184002_at	clc-1	CLaudin-like in Caenorhabditis /// locus:clc-1	molting cycle, collagen and cuticulin-based cuticle	---	integral to membrane	-2.14
184003_s_at	clc-1	CLaudin-like in Caenorhabditis /// locus:clc-1	molting cycle, collagen and cuticulin-based cuticle	---	integral to membrane	-2.46
184013_at	D1005.4	hypothetical protein /// status:Partially_confirmed	---	---	---	-1.89
184017_at	F13H8.3	hypothetical protein /// status:Partially_confirmed	---	---	---	-2.35
184037_at	math-22	MATH (meprin-associated Traf homology) domain containing /// locus:math-22	---	---	---	-2.21
184052_s_at	aco-2	ACOnitase	reproduction /// nematode larval development /// tricarboxylic acid cycle /// metabolic process /// embryonic development ending in birth or egg hatching /// growth /// locomotion /// hermaphrodite genitalia development	aconitate hydratase activity /// iron ion binding /// lyase activity /// metal ion binding /// iron-sulfur cluster binding /// 4 iron, 4 sulfur cluster binding	mitochondrion	2.4
184059_at	clec-206	C-type LECtin /// locus:clec-206	---	binding	---	-1.88
184063_at		status:Predicted /// hypothetical protein	---	---	---	-1.98
184073_at	try-5	TRYpsin-like Protease /// locus:try-5	proteolysis	catalytic activity /// serine-type endopeptidase activity /// peptidase activity	---	-1.81
184075_s_at	ify-1	Interactor of FizzY protein /// locus:ify-1	reproduction /// embryonic development ending in birth or egg hatching /// hermaphrodite genitalia development	protein binding	---	1.83
184079_at	fpn-1.2	FerroPortiN /// locus:fpn-1.2	---	---	integral to membrane	1.89
184088_at	F44E7.7	hypothetical protein /// status:Partially_confirmed	transport	transporter activity	integral to membrane	-1.83
184091_at	grl-10	GRound-Like (grd related) /// locus:grl-10	---	---	integral to membrane	-2.36
184098_s_at		status:Confirmed /// hypothetical protein	histidine catabolic process /// embryonic development ending in birth or egg hatching /// carbohydrate catabolic process	catalytic activity /// dopamine beta-monooxygenase activity /// carbohydrate binding	extracellular region	-3.1
184100_at	math-25	MATH (meprin-associated Traf homology) domain containing /// locus:math-25	locomotion /// positive regulation of locomotion	---	---	-2.09
184102_s_at		status:Predicted /// status:Predicted /// hypothetical protein /// hypothetical protein	---	---	---	4.41
184103_s_at	F07B7.2W09B7.2	hypothetical protein /// hypothetical protein /// status:Predicted /// status:Predicted	---	protein binding	---	-3.09
184106_at	M03F8.1	hypothetical protein /// status:Partially_confirmed	---	---	integral to membrane	-1.92
184114_at	F25E5.7	hypothetical protein /// status:Partially_confirmed	proteolysis	catalytic activity /// serine-type endopeptidase activity	---	-5.45
184129_at	C08F11.1	hypothetical protein /// status:Partially_confirmed	---	---	integral to membrane	-4.48
184130_at	F20D6.2	hypothetical protein /// status:Predicted	---	---	---	-2.68
184132_at	F36H5.8	hypothetical protein /// status:Partially_confirmed	proteolysis	serine-type peptidase activity	membrane	-2.07
184134_at	F49E8.1	hypothetical protein /// status:Confirmed	---	---	---	1.85
184142_s_at	nrde-3	Nuclear RNAi DEfective /// locus:nrde-3	---	nucleic acid binding	---	2.16
184144_at	R193.2	hypothetical protein /// status:Partially_confirmed	positive regulation of growth rate	---	---	13.43
184151_at	F26A1.9	hypothetical protein /// status:Partially_confirmed	positive regulation of growth rate	---	---	-2.7
184156_at	K12B6.8	hypothetical protein /// status:Partially_confirmed	intracellular signaling cascade	protein binding /// zinc ion binding /// metal ion binding	---	2.29
184160_at	rnh-1.3	RNase H /// locus:rnh-1.3	---	nucleic acid binding /// ribonuclease H activity /// protein binding	---	-2.04
184164_at	mif-1	MIF (macrophage migration inhibitory factor) related /// locus:mif-1	---	---	---	-2.31
184170_at	F47B8.10	hypothetical protein /// status:Confirmed	transport /// response to oxidative stress /// positive regulation of growth rate	peroxidase activity /// transporter activity /// heme binding	integral to membrane	-2.43
184174_at		status:Confirmed /// hypothetical protein	---	protein binding	---	-5.15
184175_at	F58E10.7	hypothetical protein /// status:Confirmed	---	---	---	-6.6
184185_at	C49C3.11	hypothetical protein /// status:Partially_confirmed	reproduction /// transport	hormone activity /// binding	extracellular region /// extracellular space /// integral to membrane	-2.43
184191_at	cnc-4	CaeNaCin (Caenorhabditis bacteriocin) /// locus:cnc-4	---	---	integral to membrane	-1.98
184193_at	C04F12.5	hypothetical protein /// status:Partially_confirmed	---	---	---	-1.88
184194_s_at		status:Partially_confirmed /// hypothetical protein	---	---	integral to membrane	3.11
184196_at	K09D9.9	hypothetical protein /// status:Partially_confirmed	---	---	integral to membrane	-2.09
184208_at		status:Partially_confirmed /// hypothetical protein	signal transduction /// sensory perception /// embryonic development ending in birth or egg hatching	protein binding	---	-2.42
184215_at		status:Partially_confirmed /// hypothetical protein	---	---	integral to membrane	-2.83
184219_at	C07F11.2	hypothetical protein /// status:Partially_confirmed	positive regulation of growth rate	---	---	-2
184234_s_at		status:Partially_confirmed /// hypothetical protein	malate metabolic process /// metabolic process	catalytic activity /// malic enzyme activity /// binding /// oxidoreductase activity, acting on the CH-OH group of donors, NAD or NADP as acceptor /// NAD binding	---	1.96
184240_at	F53F10.1	hypothetical protein /// status:Confirmed	---	---	---	-1.81
184243_s_at	nol-5	NucleOLar protein /// locus:nol-5	reproduction /// nematode larval development /// embryonic development ending in birth or egg hatching /// growth /// positive regulation of growth rate /// positive regulation of embryonic development /// negative regulation of vulval development /// hermaphrodite genitalia development	---	---	1.96
184248_at	cey-2	Y-box /// locus:cey-2	regulation of transcription, DNA-dependent	nucleic acid binding /// DNA binding /// protein binding	---	1.8
184258_at		status:Partially_confirmed /// hypothetical protein	---	---	---	-1.81
184260_s_at	C15B12.4	hypothetical protein /// status:Partially_confirmed	---	---	---	-2.34
184262_at	---	---	---	---	---	3.29
184282_s_at		status:Confirmed /// hypothetical protein	---	RNA binding /// protein binding	---	1.83
184291_s_at	T24C12.3	hypothetical protein /// status:Partially_confirmed	---	---	---	-1.84
184295_at		status:Partially_confirmed /// hypothetical protein	---	---	integral to membrane	-5.6
184313_s_at	K11H12.4	hypothetical protein /// status:Partially_confirmed	---	---	---	-2.87
184319_at	cpn-4	CalPoNin /// locus:cpn-4	---	---	---	-2.18
184320_at	C14F11.4	hypothetical protein	---	---	---	2.24
184324_s_at	C13F10.4	hypothetical protein /// status:Partially_confirmed	nematode larval development /// growth /// positive regulation of growth rate /// locomotion	binding	---	2.71
184331_at	F54D11.2	hypothetical protein /// status:Partially_confirmed	embryonic development ending in birth or egg hatching	---	---	3.14
184344_s_at		status:Partially_confirmed /// hypothetical protein	---	---	integral to membrane	2.12
184346_at	dyci-1	DYnein Chain, light Intermediate /// locus:dyci-1	nematode larval development /// embryonic development ending in birth or egg hatching /// pronuclear migration /// growth	protein binding	---	2.08
184347_at	F22H10.6	hypothetical protein /// status:Partially_confirmed	---	---	---	-1.95
184357_at	F29B9.10	hypothetical protein /// status:Partially_confirmed	nematode larval development /// translation /// embryonic development ending in birth or egg hatching /// growth /// positive regulation of growth rate	structural constituent of ribosome	intracellular /// ribosome	-1.86
184367_s_at	---	---	---	---	---	-2.32
184373_at		status:Partially_confirmed /// hypothetical protein	---	---	---	-2.05
184393_at	C33H5.13	hypothetical protein /// status:Confirmed	---	---	---	-2.8
184394_s_at		status:Partially_confirmed /// hypothetical protein	reproduction /// DNA repair /// regulation of transcription, DNA-dependent /// embryonic development ending in birth or egg hatching /// hermaphrodite genitalia development	RNA polymerase II transcription factor activity	nucleus	2.02
184397_s_at	C46H11.2	hypothetical protein /// status:Partially_confirmed	metabolic process	catalytic activity /// flavin-containing monooxygenase activity /// binding /// electron carrier activity /// oxidoreductase activity /// FAD binding /// NADP binding	---	2.03
184427_s_at	T23E7.2	hypothetical protein	---	---	integral to membrane	3.5
184433_at	K04F10.1	hypothetical protein /// status:Partially_confirmed	---	binding	---	-2.36
184434_at	hypothetical protein	status:Partially_confirmed /// hypothetical protein	protein amino acid phosphorylation	protein serine/threonine kinase activity /// ATP binding	---	-1.92
184448_at	F41G3.10F41G3.20	hypothetical protein /// hypothetical protein /// status:Confirmed /// status:Predicted	---	protein binding	---	-2.45
184450_at	fbxa-65	F-box A protein /// locus:fbxa-65	---	---	---	-1.87
184451_at		status:Confirmed /// hypothetical protein	---	---	---	-1.92
184473_at		status:Partially_confirmed /// hypothetical protein	---	---	---	2.99
184475_s_at	H17B01.4	hypothetical protein	positive regulation of growth rate	---	---	2.16
184489_s_at	C50E3.13	hypothetical protein /// status:Confirmed	---	protein binding	---	1.94
184508_s_at	W09G12.7	hypothetical protein /// status:Partially_confirmed	---	protein binding	---	-2.12
184516_at	C46E10.3	hypothetical protein /// status:Predicted	---	---	---	-1.97
184531_s_at	W10G11.1	hypothetical protein /// status:Partially_confirmed	---	---	---	-1.96
184533_at	C17H12.8	hypothetical protein /// status:Confirmed	---	---	---	1.89
184535_s_at	T23B12.4	hypothetical protein /// status:Partially_confirmed	embryonic development ending in birth or egg hatching	---	---	2.1
184547_at	K12C11.6	hypothetical protein /// hypothetical protein /// status:Predicted /// status:Partially_confirmed	copper ion transport	copper ion transmembrane transporter activity	integral to membrane	-2.43
184547_at	K12C11.7	hypothetical protein /// hypothetical protein /// status:Predicted /// status:Partially_confirmed	copper ion transport	copper ion transmembrane transporter activity	integral to membrane	-2.43
184549_at	K05F6.10	hypothetical protein /// status:Predicted	---	---	---	-2.53
184555_at	T20D4.12	hypothetical protein /// status:Predicted	---	---	---	3.71
184561_at	F07G11.4	hypothetical protein /// status:Partially_confirmed	---	---	---	-10.87
184562_at	C18A11.2	hypothetical protein /// status:Partially_confirmed	---	---	---	-2.74
184569_at	W08A12.4	hypothetical protein /// status:Partially_confirmed	positive regulation of growth rate	---	---	-13.64
184573_at	C12D12.5	hypothetical protein /// status:Partially_confirmed	regulation of transcription, DNA-dependent	DNA binding	nucleus	-1.94
184579_at	C04E12.4	hypothetical protein /// status:Partially_confirmed	---	---	integral to membrane	3.09
184585_at		status:Partially_confirmed /// hypothetical protein	---	---	---	-3.79
184612_s_at	wapl-1	WAPL (Drosophila Wings APart-Like cohesin interactor)	embryonic development ending in birth or egg hatching /// oviposition /// positive regulation of growth rate /// locomotion	binding	---	1.85
184616_at		status:Predicted /// hypothetical protein	---	---	integral to membrane	-2.12
184619_at	clec-137	C-type LECtin /// locus:clec-137	---	binding	---	-18.68
184624_s_at	C25H3.10	hypothetical protein	---	---	---	-1.97
184636_at	F48G7.10	hypothetical protein /// status:Partially_confirmed	protein amino acid phosphorylation /// intracellular signaling cascade	protein kinase C activity /// ATP binding /// zinc ion binding /// metal ion binding	---	-1.82
184644_at		status:Partially_confirmed /// hypothetical protein	nematode larval development /// regulation of transcription, DNA-dependent /// embryonic development ending in birth or egg hatching /// growth /// locomotion	DNA binding /// transcription factor activity	nucleus	2.78
184656_at	T19D12.3	hypothetical protein /// status:Predicted	---	---	---	3.36
184674_at	scl-12	SCP-Like extracellular protein /// locus:scl-12	---	---	extracellular region	-3.26
184695_at	clec-193	C-type LECtin /// locus:clec-193	---	binding	---	-1.8
184698_at		status:Confirmed /// hypothetical protein	lipid metabolic process	triacylglycerol lipase activity	---	-1.92
184711_at	C49G7.10	hypothetical protein /// status:Confirmed	---	---	---	-2.1
184752_at	---	---	---	---	---	-2.06
184755_at	csr-1	Chromosome-Segregation and RNAi deficient	reproduction /// nematode larval development /// embryonic development ending in birth or egg hatching /// growth	nucleic acid binding	---	2.67
184771_at	H02F09.2	hypothetical protein /// status:Partially_confirmed	---	---	---	2.23
184777_s_at	K06A9.1	hypothetical protein	---	---	integral to membrane	3.39
184787_at	F46G11.2	hypothetical protein /// status:Confirmed	---	---	---	-1.94
184788_at	F49H12.5	hypothetical protein /// status:Confirmed	---	---	---	-2.09
184789_at		status:Confirmed /// hypothetical protein	---	protein binding	---	1.86
184819_s_at	Y66H1B.2	hypothetical protein	reproduction /// embryonic development ending in birth or egg hatching /// body morphogenesis	---	---	1.97
184822_at		status:Partially_confirmed /// hypothetical protein	---	---	---	-2.35
184829_at	F07G11.1	hypothetical protein /// status:Partially_confirmed	---	---	integral to membrane	-15.58
184833_at		status:Confirmed /// hypothetical protein	positive regulation of multicellular organism growth	protein binding	---	-2.12
184840_at		status:Confirmed /// hypothetical protein	---	protein binding	---	-4.92
184843_at	Y42G9A.3	hypothetical protein	---	protein binding	---	-2.14
184849_at	T28A11.2	hypothetical protein	---	---	---	-1.84
184853_at	C18A11.1	hypothetical protein /// status:Confirmed	---	---	---	-3.39
184855_at	T23B12.8	hypothetical protein	---	hormone activity	extracellular region	-2.38
184861_at	sax-2	Sensory AXon guidance	embryonic development ending in birth or egg hatching /// neurite development /// positive regulation of growth rate	protein binding	---	2.4
184868_at	F12A10.1	hypothetical protein /// status:Confirmed	---	---	integral to membrane	-3.56
184874_at	W04H10.2	hypothetical protein /// status:Predicted	---	---	---	-1.93
184876_at	math-41	MATH (meprin-associated Traf homology) domain containing /// locus:math-41	---	protein binding	---	2.94
184888_at	math-39	MATH (meprin-associated Traf homology) domain containing /// locus:math-39	---	---	---	-1.96
184890_at		status:Confirmed /// hypothetical protein	---	---	---	-2.55
184904_at	---	---	---	---	---	1.94
184912_s_at	clec-118clec-144	C-type LECtin /// C-type LECtin /// locus:clec-144 /// locus:clec-118	---	binding	---	-2.04
184913_s_at	T22F3.11	hypothetical protein	transport	transporter activity	integral to membrane	38.96
184933_at	clec-194	C-type LECtin /// locus:clec-194	---	binding	---	-1.84
184978_at	map-2	Methionine AminoPeptidase /// locus:map-2	reproduction /// proteolysis /// gamete generation /// gonad development /// embryonic development ending in birth or egg hatching /// cellular process /// positive regulation of growth rate /// positive regulation of multicellular organism growth	aminopeptidase activity /// hormone activity /// metalloexopeptidase activity	extracellular region	1.92
184992_at	C33E10.1	hypothetical protein /// status:Confirmed	---	---	---	-2.01
184995_s_at	C04E6.11	hypothetical protein /// status:Partially_confirmed	---	---	---	2.34
185017_at	C49H3.12	hypothetical protein /// status:Partially_confirmed	---	---	---	-2.1
185023_at		status:Partially_confirmed /// hypothetical protein	---	nucleic acid binding /// exonuclease activity	intracellular	-2.25
185024_s_at		status:Partially_confirmed /// hypothetical protein	---	nucleic acid binding /// exonuclease activity	intracellular	-2.22
185046_at	F19F10.3	hypothetical protein /// status:Predicted	---	---	---	-2.65
185070_s_at	pqn-22	Prion-like-(Q/N-rich)-domain-bearing protein	embryonic development ending in birth or egg hatching	protein binding	---	2.04
185071_at	F26D11.2	hypothetical protein /// status:Partially_confirmed	---	---	---	-2.58
185073_at	K07C11.3	hypothetical protein /// status:Confirmed	---	protein binding /// metalloendopeptidase inhibitor activity	extracellular region /// proteinaceous extracellular matrix	-2.43
185078_at	rga-3	Rho GTPase Activating protein /// locus:rga-3	reproduction /// cytokinesis /// signal transduction /// embryonic development ending in birth or egg hatching /// cortical actin cytoskeleton organization /// regulation of actin filament-based process /// regulation of actin filament-based process /// asymmetric protein localization during cell fate commitment /// cell division	Rho GTPase activator activity	intracellular	2.34
185101_at	T28A11.6	hypothetical protein /// status:Partially_confirmed	---	---	integral to membrane	1.89
185117_at	C44E12.1	hypothetical protein /// status:Confirmed	proteolysis	metallopeptidase activity /// hydrolase activity /// protein dimerization activity	---	-2.02
185124_at	T10B11.5	hypothetical protein /// status:Partially_confirmed	---	---	---	-3.42
185130_at	K11D12.8	hypothetical protein /// status:Partially_confirmed	---	---	integral to membrane	-1.81
185138_s_at		status:Confirmed /// hypothetical protein	potassium ion transport	voltage-gated potassium channel activity /// protein binding	voltage-gated potassium channel complex /// membrane /// integral to membrane	-2.23
185145_at		status:Partially_confirmed /// hypothetical protein	---	---	---	-3.23
185158_s_at	C33C12.4	hypothetical protein /// status:Partially_confirmed	embryonic development ending in birth or egg hatching	---	integral to membrane	-1.95
185166_s_at	flp-18	FMRF-Like Peptide /// locus:flp-18	neuropeptide signaling pathway /// neuropeptide signaling pathway /// embryonic development ending in birth or egg hatching /// oviposition	---	extracellular region /// extracellular region	-2.56
185173_at	F41E6.12	hypothetical protein /// status:Confirmed	---	---	---	-4.28
185185_at	F59E11.7	hypothetical protein	---	---	integral to membrane	-2.62
185195_at		status:Predicted /// hypothetical protein	---	---	---	-1.9
185216_at		status:Partially_confirmed /// hypothetical protein	---	---	---	-2.35
185220_s_at	D2096.11	hypothetical protein /// hypothetical protein /// status:Partially_confirmed /// status:Partially_confirmed	cell cycle arrest	actin binding	---	2.49
185220_s_at	M116.5	hypothetical protein /// hypothetical protein /// status:Partially_confirmed /// status:Partially_confirmed	cell cycle arrest	actin binding	---	2.49
185223_at	K02F3.12	hypothetical protein	DNA recombination	nucleic acid binding /// helicase activity /// ATP binding /// ATP-dependent helicase activity	---	2.19
185229_at		status:Confirmed /// hypothetical protein	---	---	integral to membrane	-3.06
185233_at	scrm-8	SCRaMblase (phospholipid scramblase) /// locus:scrm-8	---	protein binding	---	-2.12
185257_at		status:Predicted /// hypothetical protein	---	---	---	-2.2
185263_at	C35A11.1	hypothetical protein /// status:Partially_confirmed	G-protein coupled receptor protein signaling pathway	---	integral to membrane	-1.82
185270_at	F53E10.4	hypothetical protein /// status:Confirmed	---	---	---	-2.71
185273_at	E02C12.8	hypothetical protein	---	---	---	4.96
185275_at	cdr-5	CaDmium Responsive /// locus:cdr-5	---	---	integral to membrane	5.98
185280_at	H43E16.1	hypothetical protein /// status:Partially_confirmed	---	---	integral to membrane	2.03
185282_s_at	F56A11.5	hypothetical protein /// status:Confirmed	neuropeptide signaling pathway	catalytic activity /// neuropeptide hormone activity /// protein binding /// molybdenum ion binding /// pyridoxal phosphate binding	integral to membrane	1.84
185290_at		status:Partially_confirmed /// hypothetical protein	---	---	---	-3.09
185295_s_at	C01B10.3	hypothetical protein /// status:Partially_confirmed	---	protein binding	---	-2.05
185296_at	C24H12.6	hypothetical protein /// status:Partially_confirmed	---	---	---	2.23
185302_s_at		status:Confirmed /// hypothetical protein	reproduction /// embryonic development ending in birth or egg hatching	binding	---	1.91
185309_at	clec-92	C-type LECtin /// locus:clec-92	---	binding	integral to membrane	-2.05
185324_at	F46F5.16	hypothetical protein /// status:Partially_confirmed	---	---	integral to membrane	-4.5
185333_at	btb-9	BTB (Broad/complex/Tramtrack/Bric a brac) domain protein /// locus:btb-9	---	protein binding	---	-1.99
185338_at	fbxb-11	F-box B protein /// locus:fbxb-11	---	---	integral to membrane	-3.08
185339_at	F15E11.5	hypothetical protein /// status:Partially_confirmed	---	---	membrane	-1.84
185341_s_at	bcc-1	BiCaudal C (Drosophila) homolog /// locus:bcc-1	embryonic development ending in birth or egg hatching	RNA binding /// phosphopantetheine binding	---	-3.03
185357_at		status:Confirmed /// hypothetical protein	nematode larval development /// growth /// positive regulation of growth rate /// locomotion	---	integral to membrane	-2.4
185361_at	C17G10.7	hypothetical protein /// status:Partially_confirmed	---	---	integral to membrane	-3.87
185369_at	ugt-27	UDP-GlucuronosylTransferase /// locus:ugt-27	metabolic process	transferase activity /// transferase activity, transferring glycosyl groups /// transferase activity, transferring hexosyl groups	integral to membrane	-2.17
185376_s_at	M01B12.4	hypothetical protein	---	---	---	1.87
185383_at	C41D11.3	hypothetical protein	---	---	---	2.98
185387_s_at		status:Confirmed /// hypothetical protein	post-translational protein modification /// regulation of protein metabolic process	small conjugating protein ligase activity	integral to membrane	1.84
185389_at	D2096.10	hypothetical protein /// status:Partially_confirmed	---	---	---	4.07
185413_at		status:Partially_confirmed /// hypothetical protein	---	---	---	-3.08
185418_at		status:Partially_confirmed /// hypothetical protein	metabolic process	transferase activity, transferring hexosyl groups	---	1.87
185434_at	fbxa-158	F-box A protein	positive regulation of growth rate	---	---	-5.12
185446_at		status:Confirmed /// hypothetical protein	---	protein binding /// zinc ion binding	intracellular	-1.85
185448_at	gip-1	Gamma-tubulin Interacting Protein	microtubule cytoskeleton organization /// embryonic development ending in birth or egg hatching	protein binding	spindle pole /// microtubule organizing center /// integral to membrane	1.98
185453_at	H14A12.5	hypothetical protein /// status:Partially_confirmed	---	---	---	-2.96
185456_at	H41C03.3	hypothetical protein /// status:Partially_confirmed	---	acetylglucosaminyltransferase activity	membrane /// integral to membrane	1.88
185458_s_at	F19B10.2	hypothetical protein /// status:Confirmed	---	---	---	1.96
185466_at	F59E12.1	hypothetical protein /// status:Confirmed	---	---	---	2.43
185494_at	F42A10.6	hypothetical protein /// status:Confirmed	---	---	---	-3.92
185495_at	C25E10.4	hypothetical protein /// status:Partially_confirmed	---	---	integral to membrane	-1.81
185497_at	F43B10.1	hypothetical protein /// status:Partially_confirmed	---	---	integral to membrane	-2.24
185498_at		status:Confirmed /// hypothetical protein	---	---	integral to membrane	-2.96
185512_at	F35H10.2	hypothetical protein /// status:Partially_confirmed	---	---	---	-3.58
185519_at	swm-1	Sperm activation Without Mating	---	peptidase activity	---	-2.56
185525_at	cyp-35A1	CYtochrome P450 family /// locus:cyp-35A1	---	monooxygenase activity /// iron ion binding /// electron carrier activity /// heme binding	---	2.45
185534_at	clec-138	C-type LECtin /// locus:clec-138	---	---	---	-3.93
185552_s_at	clec-135	C-type LECtin /// locus:clec-135	---	binding	---	-2.08
185554_s_at		status:Confirmed /// hypothetical protein	---	protein binding	---	7.74
185556_at	C32E12.1	hypothetical protein /// status:Partially_confirmed	---	---	---	-1.93
185557_s_at	lys-7	LYSozyme /// locus:lys-7	carbohydrate metabolic process /// determination of adult life span	catalytic activity /// cation binding	---	-3.36
185573_at	spp-6	SaPosin-like Protein family /// locus:spp-6	---	---	---	-2.08
185578_at	C45H4.13	hypothetical protein /// status:Partially_confirmed	---	---	integral to membrane	2.41
185579_at	R09F10.8	hypothetical protein /// status:Confirmed	embryonic development ending in birth or egg hatching	---	---	2.45
185593_at	H23N18.5	hypothetical protein /// status:Partially_confirmed	phospholipid metabolic process /// lipid catabolic process	phospholipase A2 activity	---	-2.02
185601_s_at	---	---	---	---	---	-1.92
185604_s_at	C44E4.1	hypothetical protein	DNA replication	---	---	1.99
185616_at	F55A12.1	hypothetical protein /// status:Partially_confirmed	embryonic development ending in birth or egg hatching	nucleic acid binding	---	2.94
185622_at		status:Partially_confirmed /// hypothetical protein	---	---	---	-1.97
185631_at	C01B12.5	hypothetical protein /// status:Partially_confirmed	---	---	integral to membrane	-1.86
185641_at		status:Partially_confirmed /// hypothetical protein	---	---	integral to membrane	-3.4
185653_at	cwp-2	Coexpressed With Polycystins /// locus:cwp-2	---	---	---	-2.18
185660_s_at	T12A2.15	hypothetical protein	---	---	integral to membrane	2.1
185662_at	srh-154	Serpentine Receptor, class H /// locus:srh-154	---	---	integral to membrane	-1.97
185666_at	rsa-2	Regulator of Spindle Assembly	reproduction /// mitotic spindle organization /// embryonic development ending in birth or egg hatching /// protein localization in organelle /// positive regulation of growth rate /// locomotion /// hermaphrodite genitalia development	protein binding	---	2.45
185667_s_at	rsa-2	Regulator of Spindle Assembly	reproduction /// mitotic spindle organization /// embryonic development ending in birth or egg hatching /// protein localization in organelle /// positive regulation of growth rate /// locomotion /// hermaphrodite genitalia development	protein binding	---	1.83
185670_at	R03H10.1	hypothetical protein /// status:Predicted	---	---	---	-2.39
185675_at		status:Partially_confirmed /// hypothetical protein	---	protein binding	---	-1.96
185679_at	aakb-2	AMP-Activated Kinase Beta subunit /// locus:aakb-2	---	---	---	2.05
185690_at	C25E10.8	hypothetical protein /// status:Confirmed	---	protein binding	---	-4.75
185716_at	math-10	MATH (meprin-associated Traf homology) domain containing /// locus:math-10	---	---	---	4.25
185717_s_at	F21C10.7	hypothetical protein /// status:Partially_confirmed	---	---	---	3.46
185723_at	ttr-47	TransThyretin-Related family domain /// locus:ttr-47	transport	transporter activity	extracellular region	-2.25
185756_at		status:Partially_confirmed /// hypothetical protein	---	---	---	2.65
185774_s_at	spp-8	SaPosin-like Protein family /// locus:spp-8	---	---	---	-1.93
185779_at	T05B11.4	hypothetical protein /// status:Predicted	---	---	integral to membrane	1.97
185791_s_at	R09E12.3	hypothetical protein /// status:Confirmed	---	binding	---	2.52
185795_at	pqn-13	Prion-like-(Q/N-rich)-domain-bearing protein	---	---	---	-1.85
185797_s_at	pme-5	Poly(ADP-ribose) Metabolism Enzyme	DNA repair /// protein amino acid ADP-ribosylation /// response to DNA damage stimulus	NAD+ ADP-ribosyltransferase activity /// transferase activity /// transferase activity, transferring glycosyl groups	nucleus	2.2
185798_at	F28A12.3	hypothetical protein /// status:Partially_confirmed	---	---	integral to membrane	-3.15
185804_at		status:Partially_confirmed /// hypothetical protein	---	O-methyltransferase activity	---	-1.93
185811_at		status:Confirmed /// hypothetical protein	---	---	---	-2.04
185816_at	F45E12.6	hypothetical protein /// status:Partially_confirmed	---	---	---	-2.35
185818_at	T17A3.10	hypothetical protein /// status:Partially_confirmed	---	---	integral to membrane	-2.57
185822_s_at	T19H12.3	hypothetical protein /// status:Confirmed	metabolic process	transferase activity, transferring hexosyl groups	---	-1.95
185826_at	T03F1.11	hypothetical protein /// status:Confirmed	---	calcium ion binding	---	-3.01
185837_at	F21C10.4	hypothetical protein /// status:Partially_confirmed	---	---	integral to membrane	-2.09
185866_at		status:Partially_confirmed /// hypothetical protein	---	---	integral to membrane	-3.21
185869_at	F35H10.3	hypothetical protein /// status:Partially_confirmed	---	---	---	-1.95
185910_at	fbxa-6	F-box A protein /// locus:fbxa-6	cytokinesis /// oogenesis /// cell division	---	---	-2.05
185911_at	F56C9.10	hypothetical protein	---	protein binding	---	2.56
185913_at	sec-23	yeast SEC homolog /// locus:sec-23	reproduction /// nematode larval development /// transport /// intracellular protein transport /// ER to Golgi vesicle-mediated transport /// embryonic development ending in birth or egg hatching /// protein transport /// molting cycle, collagen and cuticulin-based cuticle /// defecation /// positive regulation of growth rate	protein binding /// zinc ion binding	COPII vesicle coat	2.26
185923_at	R01B10.3	hypothetical protein /// status:Partially_confirmed	reproduction	---	integral to membrane	-2.39
185927_s_at	C17B7.13K02B7.2K02E7.2R09E12.5W03G1.3	hypothetical protein /// hypothetical protein /// hypothetical protein /// hypothetical protein /// hypothetical protein /// status:Predicted /// status:Predicted /// status:Predicted /// status:Predicted	---	---	---	1.86
185928_s_at	plk-2	POLO Kinase /// locus:plk-2	protein amino acid phosphorylation /// cell cycle /// cell cycle	nucleotide binding /// protein kinase activity /// protein serine/threonine kinase activity /// protein tyrosine kinase activity /// protein binding /// ATP binding /// kinase activity /// transferase activity /// polo kinase kinase activity	nucleus /// nucleus	2.79
185929_at	F45D11.1	hypothetical protein /// status:Partially_confirmed	---	---	---	-3.4
185938_at		status:Partially_confirmed /// hypothetical protein	---	---	---	-1.83
185960_at	F55E10.4	hypothetical protein /// status:Predicted	---	---	integral to membrane	1.82
185995_at	srw-130	Serpentine Receptor, class W /// locus:srw-130	---	receptor activity	integral to membrane	-2.17
185997_s_at	pdk-1	PDK-class protein kinase	protein amino acid phosphorylation /// multicellular organismal development /// learning or memory /// dauer larval development /// dauer larval development /// regulation of chemotaxis	nucleotide binding /// protein kinase activity /// protein serine/threonine kinase activity /// protein tyrosine kinase activity /// ATP binding /// kinase activity /// transferase activity	cytoplasm	1.83
185999_at	C03G6.17	hypothetical protein /// status:Confirmed	---	---	---	-4.63
186006_at	clec-122	C-type LECtin /// locus:clec-122	---	binding	---	1.81
186010_at	C32E8.11	hypothetical protein /// status:Partially_confirmed	ubiquitin-dependent protein catabolic process /// protein catabolic process	ubiquitin-protein ligase activity /// protein binding /// zinc ion binding /// ligase activity /// metal ion binding	---	2.6
186016_s_at	met-1	histone METhyltransferase-like	negative regulation of transcription from RNA polymerase II promoter /// histone H3-K36 methylation /// positive regulation of growth rate /// locomotion /// negative regulation of vulval development /// histone H3-K9 methylation	protein binding /// methyltransferase activity /// transferase activity /// histone-lysine N-methyltransferase activity	nucleus	4.56
186024_s_at	K11D12.7	hypothetical protein /// status:Confirmed	---	serine-type endopeptidase inhibitor activity	---	-1.88
186025_at	R03H10.4	hypothetical protein /// status:Partially_confirmed	---	---	---	-2.37
186042_at		status:Partially_confirmed /// hypothetical protein	---	---	---	2.54
186043_at	F20A1.10	hypothetical protein /// status:Confirmed	---	---	---	-3.13
186049_at	F52C12.4	hypothetical protein /// status:Partially_confirmed	---	---	---	-1.95
186055_at	grd-10	GRounDhog (hedgehog-like family) /// locus:grd-10	molting cycle, collagen and cuticulin-based cuticle /// locomotion /// positive regulation of multicellular organism growth	---	---	1.89
186060_at	C44B12.3	hypothetical protein /// status:Predicted /// status:Confirmed /// hypothetical protein	positive regulation of growth rate /// protein insertion into membrane	---	membrane /// integral to membrane	2.89
186079_at	sdz-35	SKN-1 Dependent Zygotic transcript /// locus:sdz-35	potassium ion transport	voltage-gated potassium channel activity /// protein binding	voltage-gated potassium channel complex /// membrane	-1.92
186081_s_at	F33G12.6	hypothetical protein	---	catalytic activity	---	-2.47
186082_at		status:Partially_confirmed /// hypothetical protein	nematode larval development /// DNA methylation /// rRNA processing /// embryonic development ending in birth or egg hatching /// growth /// positive regulation of growth rate	DNA binding	small-subunit processome	3.16
186088_s_at	F41H10.3	hypothetical protein	---	---	---	2.62
186108_at		status:Confirmed /// hypothetical protein	---	---	---	2.27
186118_at	F35H12.1	hypothetical protein /// status:Predicted	---	---	---	1.81
186120_at	moc-2	MOlybdenum Cofactor biosynthesis /// locus:moc-2	Mo-molybdopterin cofactor biosynthetic process	---	---	-2.17
186124_at	T02B11.4	hypothetical protein /// status:Confirmed	---	---	---	-7.51
186133_s_at	F39C12.1	hypothetical protein /// status:Partially_confirmed	---	---	---	2.31
186139_at	scl-15	SCP-Like extracellular protein /// locus:scl-15	---	---	extracellular region	-2.12
186143_at	H20E11.3	hypothetical protein	---	---	---	-3.67
186146_s_at	Y37D8A.11	hypothetical protein	reproduction /// chromatin assembly or disassembly /// gamete generation /// body morphogenesis /// hermaphrodite genitalia development	chromatin binding	chromatin /// nucleus	2
186157_at	ttr-40ttr-49	TransThyretin-Related family domain /// TransThyretin-Related family domain /// locus:ttr-40 /// locus:ttr-49	---	---	---	-2.76
186171_at	Y44E3A.1	hypothetical protein	---	---	---	-2.28
186182_s_at	hrg-1	Heme Responsive Gene /// locus:hrg-1	transport	---	lysosome /// lysosomal membrane /// endosome /// endosome membrane /// membrane /// integral to membrane	7.32
186186_at	T22F3.10	hypothetical protein /// status:Partially_confirmed	transport	transporter activity	integral to membrane	2.3
186190_at	F49F1.11	hypothetical protein /// status:Predicted	---	sugar binding	---	-7.93
186198_at	EEED8.13	hypothetical protein /// status:Partially_confirmed	---	---	---	-1.91
186199_at	acs-16	fatty Acid CoA Synthetase family /// locus:acs-4	reproduction /// morphogenesis of an epithelium /// metabolic process /// embryonic development ending in birth or egg hatching /// locomotion	catalytic activity	---	2.13
186205_at		status:Partially_confirmed /// hypothetical protein	---	---	---	2.36
186211_at		status:Partially_confirmed /// hypothetical protein	---	---	integral to membrane	-3.1
186221_at		status:Partially_confirmed /// hypothetical protein	embryonic development ending in birth or egg hatching	---	---	-5.5
186229_at	F45F2.10	hypothetical protein /// status:Partially_confirmed	reproduction /// embryonic development ending in birth or egg hatching	---	---	2.12
186239_at	clec-53	C-type LECtin /// locus:clec-53	---	binding /// sugar binding	---	-2.51
186241_s_at	F49C12.14	hypothetical protein /// status:Confirmed	---	---	---	-2.76
186249_at	C03A7.12	hypothetical protein /// status:Partially_confirmed	metabolic process	transferase activity /// transferase activity, transferring glycosyl groups /// transferase activity, transferring hexosyl groups	integral to membrane	3.29
186260_at		status:Confirmed /// hypothetical protein	---	protein binding /// zinc ion binding	---	-1.97
186261_at	Y71F9B.9	hypothetical protein	fatty acid metabolic process /// metabolic process	catalytic activity /// binding /// oxidoreductase activity	---	1.88
186263_at	F43C11.7	hypothetical protein /// status:Confirmed	---	protein binding /// protein binding /// zinc ion binding	intracellular	-1.95
186271_at	efl-2	E2F-like (mammalian transcription factor)	regulation of transcription, DNA-dependent /// negative regulation of vulval development	transcription factor activity /// protein binding	nucleus /// transcription factor complex	-1.95
186272_at		status:Predicted /// hypothetical protein	---	protein binding /// zinc ion binding	intracellular	-4.46
186274_at	C17H11.1	hypothetical protein /// status:Partially_confirmed	G-protein coupled receptor protein signaling pathway	---	integral to membrane	1.84
186275_s_at	tbx-34	T BoX family /// locus:tbx-34	regulation of transcription, DNA-dependent /// regulation of transcription	DNA binding /// transcription factor activity	nucleus	-1.88
186299_at	H20E11.2	hypothetical protein /// status:Partially_confirmed	---	---	---	-2.33
186309_s_at	T05H4.15	hypothetical protein	embryonic development ending in birth or egg hatching	---	---	-3.87
186318_s_at	F55G1.12	hypothetical protein /// status:Partially_confirmed	sodium ion transport	sodium channel activity	membrane /// integral to membrane	1.88
186328_at	vig-1	VIG (Drosophila Vasa Intronic Gene) ortholog	embryonic development ending in birth or egg hatching	---	integral to membrane	2.18
186342_at	C07D10.5	hypothetical protein /// status:Confirmed	---	---	---	-2.4
186349_at		status:Partially_confirmed /// hypothetical protein	---	---	---	2.09
186356_at		status:Partially_confirmed /// hypothetical protein	potassium ion transport	voltage-gated potassium channel activity /// protein binding	voltage-gated potassium channel complex /// membrane /// integral to membrane	-2.53
186365_at	C53C11.2	hypothetical protein /// status:Partially_confirmed	---	---	integral to membrane	-3.81
186371_at	set-24	SET (trithorax/polycomb) domain containing /// locus:set-24	---	protein binding	nucleus	3.09
186389_at	hcp-1	HoloCentric chromosome binding Protein /// locus:hcp-1	mitotic sister chromatid segregation /// protein localization /// sister chromatid biorientation /// kinetochore assembly	protein binding	---	2.5
186391_s_at	C23G10.7	hypothetical protein	---	methyltransferase activity /// transferase activity	---	1.84
186392_at	grl-28	GRound-Like (grd related) /// locus:grl-28	---	---	integral to membrane	-2.23
186394_s_at	tag-149	Temporarily Assigned Gene name	---	---	integral to membrane	1.92
186399_at	T07C4.10	hypothetical protein /// status:Partially_confirmed	---	---	---	2.12
186413_at	H20E11.1	hypothetical protein	---	---	integral to membrane	-2.27
186419_at	---	---	---	---	---	2.95
186421_at	F21C10.3	hypothetical protein	---	---	integral to membrane	-2
186436_at	set-24	SET (trithorax/polycomb) domain containing /// locus:set-24	---	protein binding	nucleus	2.58
186440_at		status:Confirmed /// hypothetical protein	---	---	---	-1.9
186443_at	F42A10.7	hypothetical protein /// status:Confirmed	---	---	---	-3.07
186446_at	pnk-1	PaNtothenate Kinase	reproduction /// nematode larval development /// embryonic development ending in birth or egg hatching /// coenzyme A biosynthetic process /// growth /// positive regulation of growth rate	pantothenate kinase activity /// ATP binding /// kinase activity	---	1.87
186452_at		status:Predicted /// hypothetical protein	---	---	---	-3.82
186463_at	pqn-24	Prion-like-(Q/N-rich)-domain-bearing protein /// locus:pqn-24	---	---	---	-1.89
186476_at	math-44	MATH (meprin-associated Traf homology) domain containing /// locus:math-44	---	---	---	-1.83
186506_s_at	C48B4.12	hypothetical protein	---	---	integral to membrane	-2.78
186507_at	clec-217	C-type LECtin /// locus:clec-217	---	binding	---	-2.37
186516_at	fbxa-64	F-box A protein /// locus:fbxa-64	---	---	---	-2.51
186519_at	F15E11.12	hypothetical protein /// status:Confirmed	positive regulation of growth rate	---	---	-2.08
186520_at		status:Partially_confirmed /// hypothetical protein	---	nucleic acid binding /// zinc ion binding	---	-2.2
186521_at	F21C10.10	hypothetical protein /// status:Confirmed	---	---	---	2.29
186528_s_at	F46E10.11	hypothetical protein /// status:Confirmed	nematode larval development /// positive regulation of growth rate /// locomotion	protease inhibitor activity	extracellular region	-1.94
186529_at	Y116A8C.28	hypothetical protein	carbon utilization	carbonate dehydratase activity /// zinc ion binding	---	1.92
186530_at		status:Partially_confirmed /// hypothetical protein	---	---	---	-2.01
186537_at		status:Predicted /// status:Predicted /// hypothetical protein /// hypothetical protein	---	---	---	-1.86
186542_at	srh-131	Serpentine Receptor, class H /// locus:srh-131	---	---	integral to membrane	-2.07
186558_at		status:Partially_confirmed /// hypothetical protein	---	---	---	-1.95
186581_at		status:Partially_confirmed /// hypothetical protein	regulation of apoptosis	protein binding	intracellular	-1.95
186600_at		status:Partially_confirmed /// hypothetical protein	---	protein binding /// zinc ion binding /// metal ion binding	intracellular	1.82
186609_s_at	lpd-3	LiPid Depleted /// locus:lpd-3	nematode larval development /// lipid metabolic process /// sequestering of lipid /// growth	---	---	2.44
186638_s_at		status:Partially_confirmed /// hypothetical protein	embryonic development ending in birth or egg hatching	protein binding	---	2.6
186670_at	---	---	---	---	---	-3.55
186676_s_at	F35H10.10	hypothetical protein /// status:Confirmed	signal transduction /// G-protein coupled receptor protein signaling pathway	signal transducer activity /// receptor activity /// G-protein coupled receptor activity	membrane /// integral to membrane	1.92
186682_at	R144.5	hypothetical protein /// status:Partially_confirmed	---	---	integral to membrane	1.83
186687_at	hke-4.1	Histidine-rich membrane protein KE4 (mouse) homolog /// locus:hke-4.1	transport /// metal ion transport	metal ion transmembrane transporter activity	membrane /// integral to membrane	1.84
186698_s_at	cdc-14	Cell Division Cycle related	protein amino acid dephosphorylation /// protein amino acid dephosphorylation /// cell cycle /// dephosphorylation /// positive regulation of growth rate /// cell division	nucleic acid binding /// phosphoprotein phosphatase activity /// protein tyrosine phosphatase activity /// protein tyrosine phosphatase activity /// protein tyrosine/serine/threonine phosphatase activity /// zinc ion binding /// hydrolase activity /// phosphatase activity /// metal ion binding	microtubule	1.94
186700_at	fbxb-111	F-box B protein /// locus:fbxb-111	---	---	---	-2.27
186713_at		status:Confirmed /// hypothetical protein	reproduction	---	---	-3.72
186714_s_at		status:Confirmed /// hypothetical protein	reproduction	---	---	-3.59
186720_at	T28A11.19	hypothetical protein /// status:Partially_confirmed	---	---	---	1.94
186726_at		locus:nspe-1 /// hypothetical protein	---	---	integral to membrane	3.5
186728_s_at	F19B10.10	hypothetical protein /// status:Partially_confirmed	---	---	---	1.83
186742_at	sre-51	Serpentine Receptor, class E (epsilon) /// locus:sre-51	sensory perception of chemical stimulus	transmembrane receptor activity	integral to membrane	-2.35
186749_at		status:Partially_confirmed /// hypothetical protein	methylation	nucleic acid binding /// methyltransferase activity	---	2.05
186757_s_at	F42A8.1	hypothetical protein /// status:Confirmed	nematode larval development /// embryonic development ending in birth or egg hatching /// body morphogenesis /// molting cycle, collagen and cuticulin-based cuticle /// growth /// positive regulation of growth rate	---	---	1.94
186762_s_at		status:Confirmed /// hypothetical protein	---	protein binding	integral to membrane	1.84
186766_at	tbc-2	TBC (Tre-2/Bub2/Cdc16) domain family /// locus:tbc-2	embryonic development ending in birth or egg hatching /// regulation of Rab GTPase activity	Rab GTPase activator activity /// protein binding	intracellular	2.04
186781_at	F35F10.13	hypothetical protein /// status:Partially_confirmed	---	---	---	-1.94
186790_at	nuc-1	abnormal NUClease /// locus:nuc-1	DNA metabolic process /// DNA fragmentation during apoptosis /// apoptosis /// determination of adult life span	deoxyribonuclease II activity /// hydrolase activity	intracellular /// nucleus	-1.97
186792_at	C18E9.6	hypothetical protein /// status:Confirmed	reproduction /// transport /// ion transport /// anion transport /// embryonic development ending in birth or egg hatching /// protein transport /// positive regulation of growth rate /// positive regulation of multicellular organism growth /// protein import into mitochondrion	voltage-gated anion channel activity	mitochondrion /// mitochondrial outer membrane /// membrane /// integral to membrane	2.43
186799_at		status:Confirmed /// hypothetical protein	---	acid phosphatase activity /// hydrolase activity /// metal ion binding	---	-2.77
186801_s_at	F45D11.14F45D11.15F45D11.16	hypothetical protein /// hypothetical protein /// hypothetical protein /// status:Predicted /// status:Predicted /// status:Predicted	---	---	---	-1.8
186806_at	fbxb-42	F-box B protein /// locus:fbxb-42	---	---	---	-2.02
186812_s_at		status:Partially_confirmed /// hypothetical protein	---	---	---	1.94
186834_at	VW02B12L.2	hypothetical protein /// status:Partially_confirmed	protein amino acid dephosphorylation /// dephosphorylation	protein tyrosine phosphatase activity /// phosphatase activity	---	-2.57
186836_at		status:Partially_confirmed /// hypothetical protein	nematode larval development /// RNA metabolic process /// growth /// positive regulation of multicellular organism growth	binding /// protein binding	---	2.46
186837_at	acs-13	fatty Acid CoA Synthetase family /// locus:acs-13	metabolic process	catalytic activity	---	2.13
186841_at	Y57G11C.9	hypothetical protein	---	nucleotide binding /// nucleic acid binding /// protein binding	---	1.96
186859_at	C05B5.2	hypothetical protein /// status:Partially_confirmed	---	---	integral to membrane	-2.19
186862_at		status:Partially_confirmed /// hypothetical protein	---	protein binding	integral to membrane	-2.21
186880_at	C25E10.10	hypothetical protein /// status:Partially_confirmed	---	---	---	-2.37
186888_s_at	eif-3.C	Eukaryotic Initiation Factor /// locus:eif-3.C	reproduction /// translation /// translational initiation	translation initiation factor activity	eukaryotic translation initiation factor 3 complex	2.46
186890_at		status:Confirmed /// hypothetical protein	---	---	integral to membrane	1.96
186903_at		status:Confirmed /// hypothetical protein	---	---	integral to membrane	-3.63
186915_at	car-1	Cytokinesis, Apoptosis, RNA-associated /// locus:car-1	reproduction /// cytokinesis /// cell death /// embryonic development ending in birth or egg hatching /// positive regulation of locomotion	protein binding	---	1.9
186917_at	clec-129	C-type LECtin /// locus:clec-129	---	binding	---	-2.11
186921_s_at	---	---	---	---	---	2.06
186922_s_at	H14E04.2	hypothetical protein	---	---	---	1.92
186923_at		status:Partially_confirmed /// hypothetical protein	---	---	integral to membrane	-1.84
186935_at	dos-1	Delta and OSM-11-like /// locus:dos-1	---	---	---	-3.62
186950_at	C05B5.8	hypothetical protein /// status:Confirmed	---	---	membrane /// integral to membrane	-2.29
186951_s_at		status:Confirmed /// hypothetical protein	morphogenesis of an epithelium /// positive regulation of growth rate /// locomotion	---	---	1.82
186952_at	deps-1	DEfective P granules and Sterile /// locus:deps-1	reproduction /// nematode larval development /// embryonic development ending in birth or egg hatching /// growth	---	---	2.11
186956_s_at		status:Confirmed /// hypothetical protein	regulation of cyclin-dependent protein kinase activity	---	---	2.12
186969_at	hypothetical protein	status:Partially_confirmed /// hypothetical protein	---	---	integral to membrane	-2.06
186971_at	C23G10.11	hypothetical protein /// status:Confirmed	---	---	integral to membrane	22.99
186978_at	---	---	---	---	---	-1.97
186994_at	ral-1	RAL (Ras-related GTPase) homolog /// locus:ral-1	reproduction /// intracellular protein transport /// nucleocytoplasmic transport /// signal transduction /// small GTPase mediated signal transduction /// protein transport	nucleotide binding /// GTPase activity /// protein binding /// GTP binding	intracellular	-1.82
186995_at	lpr-1	LiPocalin-Related protein /// locus:lpr-1	transport	transporter activity /// binding	integral to membrane	-1.87
187003_at	hypothetical protein	status:Partially_confirmed /// hypothetical protein	embryonic development ending in birth or egg hatching	nucleic acid binding /// DNA binding /// helicase activity /// ATP binding /// oxidoreductase activity	---	1.9
187018_at		status:Confirmed /// hypothetical protein	nucleotide-excision repair	DNA binding	---	-1.99
187019_at	F37C12.10	hypothetical protein /// status:Predicted	positive regulation of growth rate	---	integral to membrane	-2.55
187023_s_at	npp-16	Nuclear Pore complex Protein	intracellular transport	---	---	2.1
187026_s_at	pvf-1	PDGF/VEGF growth factor related /// locus:pvf-1	---	growth factor activity	membrane	-2.3
187028_s_at	C33E10.10dehydrogenase	dehydrogenase	metabolic process	catalytic activity /// binding /// protein binding /// oxidoreductase activity	---	2.6
187029_at	C17H12.10	hypothetical protein /// status:Confirmed	---	---	integral to membrane	-2.24
187030_at		status:Confirmed /// hypothetical protein	---	---	---	1.82
187073_at		status:Confirmed /// hypothetical protein	cell redox homeostasis	---	---	-1.88
187081_s_at	tba-2	TuBulin, Alpha /// locus:tba-2	cytokinesis /// nematode larval development /// microtubule-based process /// microtubule-based movement /// mitotic spindle organization /// protein localization /// embryonic development ending in birth or egg hatching /// pronuclear migration /// growth /// protein polymerization /// centrosome localization	nucleotide binding /// GTPase activity /// structural molecule activity /// GTP binding	microtubule /// protein complex	1.97
187084_at	gst-10	Glutathione S-Transferase /// locus:gst-10	glutathione metabolic process /// response to stress /// determination of adult life span /// response to UV-C /// response to hydrogen peroxide	glutathione transferase activity /// glutathione transferase activity /// transferase activity	---	-2.32
187085_s_at	gst-10	Glutathione S-Transferase /// locus:gst-10	glutathione metabolic process /// response to stress /// determination of adult life span /// response to UV-C /// response to hydrogen peroxide	glutathione transferase activity /// glutathione transferase activity /// transferase activity	---	-1.8
187089_s_at		locus:zif-1 /// ZInc Finger-interacting protein	ubiquitin-dependent protein catabolic process /// ubiquitin-dependent protein catabolic process /// multicellular organismal development /// embryonic development ending in birth or egg hatching	protein binding	---	1.86
187100_s_at		status:Partially_confirmed /// hypothetical protein	nucleobase, nucleoside, nucleotide and nucleic acid metabolic process	nucleic acid binding /// 3'-5' exonuclease activity	intracellular	2.25
187106_s_at	Y48B6A.13	hypothetical protein	reproduction /// nematode larval development /// isoprenoid biosynthetic process /// embryonic development ending in birth or egg hatching /// phosphorylation /// growth /// locomotion	diphosphomevalonate decarboxylase activity /// ATP binding /// kinase activity	---	1.87
187110_at	---	---	---	---	---	-2.14
187113_at	apb-1	hypothetical protein	reproduction /// nematode larval development /// intracellular protein transport /// receptor-mediated endocytosis /// embryonic development ending in birth or egg hatching /// protein transport /// vesicle-mediated transport /// growth	binding /// protein binding /// protein binding /// protein transporter activity	membrane coat /// clathrin adaptor complex	2.14
187123_at	T09B9.3	hypothetical protein /// status:Partially_confirmed	glycerol metabolic process /// lipid metabolic process	phosphoric diester hydrolase activity /// glycerophosphodiester phosphodiesterase activity	membrane /// integral to membrane	-1.9
187136_s_at	acl-4	ACyLtransferase-like	metabolic process	acyltransferase activity /// transferase activity	integral to membrane	2.04
187138_at	elpc-2	ELongator complex Protein Component /// locus:elpc-2	translation	structural constituent of ribosome	intracellular /// ribosome	2.73
187144_at	ulp-4	Ubiquitin-Like Protease /// locus:ulp-4	proteolysis /// embryonic development ending in birth or egg hatching /// body morphogenesis /// oviposition /// positive regulation of growth rate /// hermaphrodite genitalia development	peptidase activity /// cysteine-type peptidase activity /// hydrolase activity	---	2.01
187150_at		status:Partially_confirmed /// hypothetical protein	---	---	integral to membrane	-2.03
187151_s_at	F54C8.7	hypothetical protein	---	---	---	1.85
187155_at		status:Partially_confirmed /// hypothetical protein	---	---	---	3.07
187164_at		status:Partially_confirmed /// hypothetical protein	---	nucleic acid binding /// protein binding	nucleus	1.87
187170_at	F59B2.12	hypothetical protein /// status:Partially_confirmed	---	---	---	-21.17
187175_s_at	mat-1	Metaphase-to-Anaphase Transition defect	nematode larval development /// embryonic development ending in birth or egg hatching /// positive regulation of growth rate /// hermaphrodite genitalia development	binding /// protein binding	---	1.96
187184_s_at	F56D2.6	hypothetical protein	reproduction /// morphogenesis of an epithelium /// nematode larval development /// mRNA processing /// RNA splicing /// embryonic development ending in birth or egg hatching /// growth /// positive regulation of growth rate /// locomotion /// hermaphrodite genitalia development	nucleotide binding /// nucleic acid binding /// helicase activity /// ATP binding /// hydrolase activity /// nucleoside-triphosphatase activity	nucleus	1.92
187192_at	C02B8.5	hypothetical protein /// status:Partially_confirmed	signal transduction /// G-protein coupled receptor protein signaling pathway	signal transducer activity /// receptor activity /// G-protein coupled receptor activity	plasma membrane /// membrane /// integral to membrane	-2.02
187195_at		status:Confirmed /// hypothetical protein	reproduction	---	nucleus	2.37
187197_s_at	C13B9.1	hypothetical protein /// hypothetical protein /// status:Predicted /// status:Confirmed	morphogenesis of an epithelium /// nematode larval development /// body morphogenesis /// growth /// negative regulation of vulval development	---	---	2.2
187197_s_at	F23A7.7	hypothetical protein /// hypothetical protein /// status:Predicted /// status:Confirmed	morphogenesis of an epithelium /// nematode larval development /// body morphogenesis /// growth /// negative regulation of vulval development	---	---	2.2
187222_at	D1044.1	hypothetical protein /// status:Partially_confirmed	---	kinase activity /// transferase activity	---	-1.86
187227_at	rom-5	RhOMboid (Drosophila) related /// locus:rom-5	---	---	integral to membrane	1.94
187233_s_at	clp-7	CaLPain family /// locus:clp-7	proteolysis /// cell death	cysteine-type endopeptidase activity /// calcium-dependent cysteine-type endopeptidase activity	intracellular	2.42
187234_s_at		status:Partially_confirmed /// hypothetical protein	---	---	---	-10.04
187235_at	SR-famA	SR-famA	signal transduction /// G-protein coupled receptor protein signaling pathway	signal transducer activity /// receptor activity /// G-protein coupled receptor activity	plasma membrane /// membrane /// integral to membrane	-2.5
187244_at	B0228.1	hypothetical protein /// status:Partially_confirmed	---	---	---	-3.34
187257_s_at	pme-1	Poly(ADP-ribose) Metabolism Enzyme /// locus:pme-1	DNA repair /// protein amino acid ADP-ribosylation /// response to DNA damage stimulus	DNA binding /// NAD+ ADP-ribosyltransferase activity /// zinc ion binding /// transferase activity /// transferase activity, transferring glycosyl groups /// metal ion binding /// NAD binding	nucleus	1.84
187260_s_at		status:Confirmed /// hypothetical protein	---	---	---	-2.8
187265_at	F30B5.4	hypothetical protein /// status:Confirmed	reproduction	monooxygenase activity	---	1.96
187280_s_at	ppw-2	PAZ/PIWI domain-containing /// locus:ppw-2	---	nucleic acid binding	---	2.72
187282_at	F22B7.9	hypothetical protein /// status:Confirmed	---	---	---	-2.94
187283_at		status:Partially_confirmed /// hypothetical protein	---	---	---	-10.79
187297_s_at	B0495.7	hypothetical protein /// status:Confirmed	proteolysis /// locomotion	peptidase activity	membrane /// integral to membrane	2.12
187307_at	knl-1	Kinetochore NuLl /// locus:knl-1	reproduction /// embryonic development ending in birth or egg hatching /// hermaphrodite genitalia development	protein binding	---	2.58
187312_at		status:Partially_confirmed /// hypothetical protein	---	---	integral to membrane	-5.11
187318_at	lon-1	LONg	reproduction /// transforming growth factor beta receptor signaling pathway /// embryonic development ending in birth or egg hatching /// negative regulation of DNA endoreduplication /// positive regulation of growth rate /// positive regulation of growth rate /// negative regulation of multicellular organism growth /// negative regulation of multicellular organism growth	protein binding	extracellular region	-1.82
187321_s_at	elpc-1	ELongator complex Protein Component /// locus:elpc-1	embryonic development ending in birth or egg hatching	---	---	2.68
187327_at	C13B9.2	hypothetical protein /// status:Partially_confirmed	---	---	---	1.81
187336_at	Y110A7A.15	hypothetical protein	---	---	---	2.14
187338_at	C45G9.7	hypothetical protein /// status:Partially_confirmed	---	protein binding /// protein binding	---	-2.02
187346_at	C16C10.3	hypothetical protein /// status:Partially_confirmed	nematode larval development /// growth	nucleic acid binding	---	2.73
187353_s_at	ptc-3	PaTChed family	nematode larval development /// embryonic development ending in birth or egg hatching /// molting cycle, collagen and cuticulin-based cuticle /// growth /// locomotion /// positive regulation of multicellular organism growth	hedgehog receptor activity	membrane /// integral to membrane	1.91
187358_at	dct-5	DAF-16/FOXO Controlled, germline Tumor affecting /// locus:dct-5	---	---	membrane /// integral to membrane	1.84
187364_at	B0302.2	hypothetical protein /// status:Partially_confirmed	---	---	---	2.22
187366_s_at	rfp-1	Ring Finger Protein, UBC associated	reproduction /// morphogenesis of an epithelium /// nematode larval development /// ubiquitin-dependent protein catabolic process /// glycolipid metabolic process /// embryonic development ending in birth or egg hatching /// chromatin modification /// growth /// positive regulation of growth rate /// locomotion /// vulval development /// hermaphrodite genitalia development	protein binding /// protein binding /// zinc ion binding /// ligase activity /// metal ion binding	nucleus /// nucleus /// chromosome	1.86
187384_s_at	let-767	LEThal /// locus:let-767	reproduction /// nematode larval development /// steroid biosynthetic process /// metabolic process /// determination of adult life span /// lipid biosynthetic process /// embryonic development /// embryonic development ending in birth or egg hatching /// female genitalia development /// regulation of hormone metabolic process /// growth /// positive regulation of growth rate /// locomotion /// m…	catalytic activity /// alcohol dehydrogenase activity /// binding /// protein binding /// proteasome activator activity /// oxidoreductase activity	proteasome complex /// nucleus /// cytoplasm /// cytosol /// integral to membrane /// protein complex	1.94
187391_at	F40B5.1	hypothetical protein /// status:Confirmed	proteolysis	metalloendopeptidase activity	membrane	2.36
187398_s_at	F55F8.3	hypothetical protein /// status:Partially_confirmed	nematode larval development /// protein amino acid phosphorylation /// growth	protein kinase activity /// ATP binding	---	2.45
187403_at	alx-1	ALIX (Apoptosis-linked gene 2 interacting protein X) homolog	endosome organization /// endocytic recycling /// protein localization in organelle /// regulation of protein catabolic process	---	---	2.12
187404_at	B0416.2	hypothetical protein /// status:Partially_confirmed	---	---	---	-2.65
187410_at	his-10 his-14 his-26 his-31 his-46 his-56 his-60 his-64	HIStone /// HIStone /// HIStone /// HIStone /// HIStone /// HIStone /// HIStone /// HIStone /// locus:his-10 /// locus:his-14 /// locus:his-26 /// locus:his-31 /// locus:his-46 /// locus:his-56 /// locus:his-60 /// locus:his-64	reproduction /// nematode larval development /// nucleosome assembly /// defense response /// embryonic development ending in birth or egg hatching /// body morphogenesis /// growth /// positive regulation of growth rate /// locomotion /// hermaphrodite genitalia development	DNA binding	nucleosome /// nucleus /// chromosome	-1.88
187420_at	srxa-10	Serpentine Receptor, class XA /// locus:srxa-10	embryonic development ending in birth or egg hatching	---	membrane /// integral to membrane	-2
187430_at	K10D2.1	hypothetical protein /// hypothetical protein /// status:Confirmed	transcription /// regulation of transcription, DNA-dependent /// sulfur metabolic process /// embryonic development ending in birth or egg hatching /// chromatin modification /// positive regulation of growth rate /// regulation of transcription	transcription regulator activity	nucleus	-2.35
187430_at	K10D2.7	hypothetical protein /// hypothetical protein /// status:Confirmed	transcription /// regulation of transcription, DNA-dependent /// sulfur metabolic process /// embryonic development ending in birth or egg hatching /// chromatin modification /// positive regulation of growth rate /// regulation of transcription	transcription regulator activity	nucleus	-2.35
187433_at		status:Confirmed /// hypothetical protein	---	---	---	-1.87
187436_s_at	F02A9.4	hypothetical protein	nematode larval development /// RNA processing /// embryonic development ending in birth or egg hatching /// growth /// positive regulation of growth rate	RNA binding /// methylcrotonoyl-CoA carboxylase activity /// ribonuclease III activity /// ligase activity	mitochondrion /// mitochondrial matrix	1.93
187438_s_at	B0361.9	hypothetical protein /// status:Confirmed	positive regulation of growth rate	---	---	-3.03
187444_at	clec-158	C-type LECtin /// locus:clec-158	---	binding	---	-3.03
187447_at	tag-209	Temporarily Assigned Gene name /// locus:tag-209	---	---	---	-2.63
187452_at	C31H2.4	4-hydroxyphenylpyruvate dioxygenase (4HPPD)	aromatic amino acid family metabolic process	4-hydroxyphenylpyruvate dioxygenase activity /// iron ion binding /// metal ion binding	---	2.16
187470_s_at	R06F6.8	hypothetical protein	---	protein binding	membrane /// integral to membrane	2.69
187477_s_at	F19F10.11	hypothetical protein	---	---	---	3.28
187497_at	C02C2.4	hypothetical protein /// status:Partially_confirmed	transport /// ion transport /// sodium ion transport	transporter activity /// symporter activity /// sodium ion binding	membrane /// integral to membrane	2.29
187502_s_at	D1022.3	hypothetical protein /// hypothetical protein /// status:Partially_confirmed /// status:Predicted	---	hydrolase activity	---	-2.19
187502_s_at	K02A2.1	hypothetical protein /// hypothetical protein /// status:Partially_confirmed /// status:Predicted	---	hydrolase activity	---	-2.19
187505_at	B0310.3	hypothetical protein /// status:Partially_confirmed	---	---	membrane /// integral to membrane	-1.97
187508_at	apc-2	Anaphase Promoting Complex; see also mat /// locus:apc-2	reproduction /// ubiquitin-dependent protein catabolic process /// cell cycle /// mitosis /// meiosis /// embryonic development ending in birth or egg hatching /// hermaphrodite genitalia development /// cell division	protein binding /// ubiquitin protein ligase binding	cullin-RING ubiquitin ligase complex	2.27
187516_at	K06H7.2	hypothetical protein /// status:Partially_confirmed	---	---	---	-1.83
187519_at	B0303.2	hypothetical protein /// status:Confirmed	---	methyltransferase activity /// transferase activity	---	-1.81
187537_s_at	dcap-1	mRNA DeCAPping enzyme /// locus:dcap-1	---	---	---	1.83
187543_s_at	nmt-1	N-Myristoyl Transferase homolog	reproduction /// nematode larval development /// N-terminal protein myristoylation /// embryonic development ending in birth or egg hatching /// growth /// positive regulation of growth rate /// locomotion	glycylpeptide N-tetradecanoyltransferase activity /// acyltransferase activity /// transferase activity	cytoplasm	2.11
187544_at	K07E3.7	hypothetical protein	ATP biosynthetic process /// cation transport	nucleotide binding /// magnesium ion binding /// ATP binding /// ATPase activity, coupled to transmembrane movement of ions, phosphorylative mechanism /// hydrolase activity /// hydrolase activity, acting on acid anhydrides, catalyzing transmembrane movement of substances /// ATPase activity /// metal ion binding	membrane /// integral to membrane	-2.02
187557_s_at	T12A2.2	hypothetical protein /// status:Confirmed	reproduction /// nematode larval development /// protein amino acid glycosylation /// embryonic development ending in birth or egg hatching /// growth /// locomotion /// negative regulation of multicellular organism growth	oligosaccharyl transferase activity	membrane /// integral to membrane	1.84
187567_at	F59E12.6	hypothetical protein /// status:Predicted /// hypothetical protein	protein amino acid phosphorylation /// ubiquitin-dependent protein catabolic process /// embryonic development ending in birth or egg hatching	ubiquitin thiolesterase activity /// protein kinase activity /// ATP binding	membrane /// integral to membrane	3.57
187572_at		status:Partially_confirmed /// hypothetical protein	---	---	integral to membrane	-2.55
187582_at	nlp-11	Neuropeptide-Like Protein /// locus:nlp-11	neuropeptide signaling pathway	---	---	-2.21
187589_at	C35C5.8	hypothetical protein	---	---	integral to membrane	4.12
187596_at	T20B12.3	hypothetical protein /// status:Partially_confirmed	reproduction /// nematode larval development /// embryonic development ending in birth or egg hatching /// growth /// positive regulation of growth rate /// locomotion /// positive regulation of multicellular organism growth	---	---	1.94
187598_at	C35C5.8	hypothetical protein	---	---	integral to membrane	3.84
187605_at	sys-1	SYmmetrical Sister cell hermaphrodite gonad defect	reproduction /// gastrulation with mouth forming first /// morphogenesis of an epithelium /// nematode larval development /// male gonad development /// female gonad development /// regulation of asymmetric cell division /// embryonic development /// embryonic development ending in birth or egg hatching /// proximal/distal pattern formation /// polarity specification of proximal/distal axis /// p…	binding	---	1.83
187606_at	nas-28	Nematode AStacin protease /// locus:nas-28	proteolysis	metalloendopeptidase activity /// peptidase activity /// metallopeptidase activity /// zinc ion binding /// hydrolase activity /// metal ion binding	extracellular region	-1.81
187618_at	gsy-1	Glycogen SYnthase /// locus:gsy-1	nematode larval development /// glycogen biosynthetic process /// embryonic development ending in birth or egg hatching /// body morphogenesis /// locomotion	glycogen (starch) synthase activity /// protein binding /// transferase activity /// transferase activity, transferring glycosyl groups	---	1.96
187619_s_at	ccf-1	yeast CCR4 Associated Factor family /// locus:ccf-1	reproduction /// nematode larval development /// transcription /// regulation of transcription, DNA-dependent /// embryonic development ending in birth or egg hatching /// body morphogenesis /// hermaphrodite genitalia development /// germline cell cycle switching, mitotic to meiotic cell cycle	nucleic acid binding	nucleus	1.83
187628_s_at	C30G12.6	hypothetical protein	embryonic development ending in birth or egg hatching	---	---	2.29
187629_at	coq-8	COenzyme Q (ubiquinone) biosynthesis /// locus:coq-8	reproduction /// ubiquinone biosynthetic process /// ubiquinone biosynthetic process /// determination of adult life span /// positive regulation of growth rate	---	---	1.89
187640_s_at	E04D5.1	hypothetical protein	translation /// regulation of translation /// proteolysis /// embryonic development ending in birth or egg hatching	translation initiation factor activity /// serine-type endopeptidase activity	---	2.12
187642_s_at	eif-3.E	Eukaryotic Initiation Factor /// locus:eif-3.E	reproduction /// nematode larval development /// translation /// embryonic development ending in birth or egg hatching /// growth /// hermaphrodite genitalia development	translation initiation factor activity	---	2.2
187644_at	C44B7.11	hypothetical protein /// status:Partially_confirmed	proteolysis	peptidase activity /// metallopeptidase activity /// zinc ion binding /// hydrolase activity	membrane /// integral to membrane	1.84
187645_at	C46C2.5	hypothetical protein /// status:Partially_confirmed	---	---	integral to membrane	-2.63
187646_s_at	C46C2.5	hypothetical protein /// status:Partially_confirmed	---	---	integral to membrane	-1.98
187648_s_at	dnj-5	DNaJ domain (prokaryotic heat shock protein)	response to stress	heat shock protein binding	integral to membrane	1.91
187649_at	C05D11.5	hypothetical protein /// status:Confirmed	---	hydroxypyruvate isomerase activity /// isomerase activity	---	2.82
187653_at	K07C11.7	hypothetical protein	---	hydrolase activity	---	2.26
187662_at	F32H5.3	hypothetical protein	---	---	integral to membrane	-3.01
187664_s_at	F11E6.1	hypothetical protein	carbohydrate metabolic process /// sphingolipid metabolic process /// lysosome organization	catalytic activity /// glucosylceramidase activity /// cation binding	lysosome	-1.84
187665_at	C30G12.4	hypothetical protein /// status:Partially_confirmed	---	---	integral to membrane	-2.48
187668_at	F47D12.6	hypothetical protein /// status:Confirmed	---	---	integral to membrane	-2.44
187681_at	T25D10.4	hypothetical protein /// status:Partially_confirmed	---	---	---	-1.83
187686_at	gop-1	Gro-1 OPeron gene /// locus:gop-1	---	---	---	2.01
187689_at	T20B12.4	hypothetical protein /// status:Predicted	---	---	---	-2.04
187701_at	spp-11	SaPosin-like Protein family /// locus:spp-11	---	---	---	-1.92
187705_at	T25D10.1	hypothetical protein /// status:Confirmed	---	---	membrane /// integral to membrane	-2.31
187711_s_at	dli-1	Dynein Light Intermediate chain	morphogenesis of an epithelium /// embryonic development ending in birth or egg hatching /// pronuclear migration /// locomotion /// negative regulation of vulval development /// hermaphrodite genitalia development	motor activity /// protein binding	---	1.86
187724_s_at	F12A10.2F59E12.6	hypothetical protein /// hypothetical protein /// status:Partially_confirmed /// status:Predicted /// hypothetical protein	protein amino acid phosphorylation /// ubiquitin-dependent protein catabolic process /// embryonic development ending in birth or egg hatching	ubiquitin thiolesterase activity /// protein kinase activity /// ATP binding	membrane /// integral to membrane	3.37
187752_at	pgl-3	P GranuLe abnormality	embryonic development ending in birth or egg hatching	---	---	2.14
187756_at	dgk-5	DiacylGlycerol Kinase /// locus:dgk-5	activation of protein kinase C activity /// intracellular signaling cascade	diacylglycerol kinase activity /// kinase activity /// transferase activity	---	-1.89
187760_at	C05D2.8	hypothetical protein /// status:Confirmed	positive regulation of growth rate	---	integral to membrane	2.84
187761_s_at	C05D2.8	hypothetical protein /// status:Confirmed	positive regulation of growth rate	---	integral to membrane	2.17
187774_s_at		status:Partially_confirmed /// hypothetical protein	---	---	integral to membrane	-20.59
187779_s_at	T12C9.7	hypothetical protein	reproduction /// positive regulation of multicellular organism growth	---	nucleus	2.41
187802_at	cgh-1	Conserved Germline Helicase /// locus:cgh-1	reproduction /// morphogenesis of an epithelium /// nematode larval development /// apoptosis /// anti-apoptosis /// multicellular organismal development /// gamete generation /// spermatogenesis /// determination of adult life span /// embryonic development ending in birth or egg hatching /// mRNA metabolic process /// cell differentiation /// growth /// positive regulation of growth rate /// he…	nucleotide binding /// nucleic acid binding /// RNA binding /// helicase activity /// protein binding /// ATP binding /// ATP-dependent helicase activity /// hydrolase activity	cytoplasm	3.35
187824_at		status:Partially_confirmed /// hypothetical protein	---	---	---	-2.05
187836_s_at	C24H12.5	hypothetical protein	reproduction /// morphogenesis of an epithelium /// nematode larval development /// embryonic development ending in birth or egg hatching /// body morphogenesis /// growth /// locomotion /// hermaphrodite genitalia development	---	---	2.31
187839_s_at	---	---	---	---	---	-1.81
187840_s_at		status:Partially_confirmed /// hypothetical protein /// hypothetical protein	reproduction /// nematode larval development /// body morphogenesis /// growth /// locomotion /// hermaphrodite genitalia development	protein binding	---	2.57
187863_s_at	F26F12.3	hypothetical protein	---	---	---	2.22
187871_s_at	R102.4	hypothetical protein	amino acid metabolic process	catalytic activity /// lyase activity /// pyridoxal phosphate binding	---	-2.04
187891_at	Y71H10B.1	hypothetical protein	reproduction /// nematode larval development /// embryonic development ending in birth or egg hatching /// growth /// positive regulation of growth rate	---	---	1.97
187894_at	lim-6	LIM domain family /// locus:lim-6	regulation of transcription, DNA-dependent /// regulation of transcription	DNA binding /// transcription factor activity /// zinc ion binding /// transcription regulator activity /// sequence-specific DNA binding /// metal ion binding	nucleus	-1.83
187904_at	tlp-1	T lineage defect, LePtoderan tail /// locus:tlp-1	---	zinc ion binding	intracellular	-2.07
187912_at	R02F2.2	hypothetical protein /// status:Partially_confirmed	intracellular signaling cascade /// regulation of Rho protein signal transduction	guanyl-nucleotide exchange factor activity /// Rho guanyl-nucleotide exchange factor activity	intracellular	-2.13
187913_at	mab-10	Male ABnormal /// locus:mab-10	morphogenesis of an epithelium /// negative regulation of transcription /// hermaphrodite genitalia development	transcription repressor activity	nucleus	-2
187936_s_at	dig-1	DIsplaced Gonad	phosphate metabolic process /// cell adhesion /// multicellular organismal development /// nervous system development /// gonad development /// hermaphrodite genitalia development	magnesium ion binding /// inorganic diphosphatase activity /// copper ion binding /// calcium ion binding /// protein binding /// electron carrier activity	extracellular region /// proteinaceous extracellular matrix /// cytoplasm	3.43
187952_at	taf-4	TAF (TBP-associated transcription factor) family /// locus:taf-4	reproduction /// nematode larval development /// transcription initiation /// regulation of transcription, DNA-dependent /// embryonic development ending in birth or egg hatching /// growth /// positive regulation of growth rate /// locomotion	transcription factor activity /// protein binding /// transcription initiation factor activity	nucleus /// transcription factor TFIID complex	1.86
187953_at	kqt-2	potassium channel, KvQLT family /// locus:kqt-2	transport /// ion transport /// defecation	ion channel activity	membrane /// integral to membrane	-2.19
187956_at	rbr-2	RB (Retinoblastoma Binding protein) Related /// locus:rbr-2	transcription /// regulation of transcription, DNA-dependent /// chromatin modification /// positive regulation of growth rate /// negative regulation of vulval development /// oxidation reduction	DNA binding /// iron ion binding /// protein binding /// zinc ion binding /// oxidoreductase activity /// oxidoreductase activity, acting on single donors with incorporation of molecular oxygen, incorporation of two atoms of oxygen /// metal ion binding	intracellular /// nucleus	1.86
187962_at	ins-35	INSulin related /// locus:ins-35	---	---	integral to membrane	-8.57
187971_at	mes-6	Maternal Effect Sterile /// locus:mes-6	reproduction /// nematode larval development /// transcription /// regulation of transcription, DNA-dependent /// multicellular organismal development	---	nucleus	1.89
187974_s_at	pgl-1	P GranuLe abnormality	reproduction /// multicellular organismal development /// gamete generation /// cell differentiation /// P granule organization /// germ-line stem cell division /// oogenesis /// oogenesis	RNA binding /// protein binding /// identical protein binding	cytoplasm /// integral to membrane	1.81
187978_at	grd-7	GRounDhog (hedgehog-like family) /// locus:grd-7	molting cycle, collagen and cuticulin-based cuticle /// collagen and cuticulin-based cuticle development /// locomotion /// positive regulation of multicellular organism growth /// vulval development	structural constituent of cell wall	---	-1.87
187986_s_at	dpy-22	DumPY : shorter than wild-type /// locus:dpy-22	nematode larval development /// transcription /// regulation of transcription, DNA-dependent /// multicellular organismal development /// embryonic development ending in birth or egg hatching /// body morphogenesis /// oviposition /// positive regulation of growth rate /// locomotion /// positive regulation of multicellular organism growth /// hermaphrodite genitalia development	---	nucleus	1.95
187987_at	fkb-7	FK506-Binding protein family /// locus:fkb-7	protein folding	calcium ion binding	---	-2.1
187992_at	skr-5	SKp1 Related (ubiquitin ligase complex component) /// locus:skr-5	ubiquitin-dependent protein catabolic process	protein binding	---	-5.06
187994_at	ttn-1	TiTiN family	protein amino acid phosphorylation /// regulation of Rho protein signal transduction	nucleotide binding /// protein kinase activity /// protein serine/threonine kinase activity /// protein tyrosine kinase activity /// Rho guanyl-nucleotide exchange factor activity /// structural constituent of cell wall /// ATP binding /// kinase activity /// transferase activity	intracellular	6.4
187999_at	lea-1	plant Late Embryo Abundant (LEA) related /// locus:lea-1	response to stress	---	---	1.93
188001_s_at	him-17	High Incidence of Males (increased X chromosome loss) /// locus:him-17	reciprocal meiotic recombination /// embryonic development ending in birth or egg hatching /// meiotic chromosome segregation	structural molecule activity /// calcium ion binding	vesicle membrane	2.34
188010_at		status:Partially_confirmed /// hypothetical protein	proteolysis	aspartic-type endopeptidase activity /// peptidase activity /// hydrolase activity	---	-2.4
188028_at	grd-6	GRounDhog (hedgehog-like family) /// locus:grd-6	---	---	---	1.89
188032_at	R07A4.2	hypothetical protein /// status:Confirmed	---	---	integral to membrane	-2.09
188034_s_at	sax-3	Sensory AXon guidance	positive regulation of growth rate /// locomotion	---	integral to membrane	1.88
188042_at	sra-4	Serpentine Receptor, class A (alpha) /// locus:sra-4	sensory perception of chemical stimulus	transmembrane receptor activity	membrane /// integral to membrane	-2.02
188046_s_at	gfi-1	GEI-4(Four) Interacting protein /// locus:gfi-1	positive regulation of growth rate	---	---	6.44
188052_s_at	ced-6	CEll Death abnormality /// locus:ced-6	phagocytosis /// apoptosis /// multicellular organismal development /// programmed cell death /// engulfment of apoptotic cell	---	cytoplasm	1.87
188068_at	nlp-10	Neuropeptide-Like Protein /// locus:nlp-10	---	---	---	-2.01
188069_s_at	dpy-26	DumPY : shorter than wild-type /// locus:dpy-26	body morphogenesis /// oviposition /// positive regulation of growth rate /// dosage compensation, by hypoactivation of X chromosome /// meiotic chromosome segregation	transcription regulator activity	---	1.91
188072_at	---	---	---	---	---	2.2
188078_at	lipase	lipase	lipid metabolic process	---	---	-3.34
188084_s_at	plx-2	PLeXin /// locus:plx-2	signal transduction /// multicellular organismal development /// cell differentiation	receptor activity	intracellular /// membrane /// integral to membrane	1.83
188091_at	gpc-2	G Protein, Gamma subunit /// locus:gpc-2	signal transduction /// G-protein coupled receptor protein signaling pathway /// embryonic development ending in birth or egg hatching /// pronuclear migration	signal transducer activity	heterotrimeric G-protein complex /// membrane	-2.09
188105_s_at	mup-4	MUscle Positioning /// locus:mup-4	reproduction /// nematode larval development /// determination of adult life span /// molting cycle, collagen and cuticulin-based cuticle /// growth /// positive regulation of growth rate /// locomotion	receptor activity /// calcium ion binding /// protein binding	integral to membrane	2.56
188106_at	lipase	lipase	---	---	---	-3.87
188112_at	glb-17	GLoBin /// locus:glb-17	oxygen transport	iron ion binding /// oxygen binding /// heme binding	---	1.98
188113_s_at		YER141W /// hypothetical protein	reproduction /// protein complex assembly /// embryonic development ending in birth or egg hatching /// positive regulation of growth rate	---	membrane	2.42
188116_at	ora-1	Onchocerca Related Antigen family /// locus:ora-1	---	---	---	-1.87
188120_at	ehs-1	Eps15 (endocytosis protein) Homologous Sequence	synaptic transmission /// synaptic vesicle endocytosis	calcium ion binding	---	2.02
188123_at	lipase	lipase	lipid metabolic process	triacylglycerol lipase activity	---	-1.95
188130_s_at	klp-10	Kinesin-Like Protein /// Kinesin-Like Protein /// locus:klp-18	cytokinesis /// microtubule-based movement /// embryonic development ending in birth or egg hatching /// meiotic chromosome segregation /// cell division	nucleotide binding /// microtubule motor activity /// ATP binding	microtubule associated complex	2.19
188130_s_at	klp-18	Kinesin-Like Protein /// Kinesin-Like Protein /// locus:klp-18	cytokinesis /// microtubule-based movement /// embryonic development ending in birth or egg hatching /// meiotic chromosome segregation /// cell division	nucleotide binding /// microtubule motor activity /// ATP binding	microtubule associated complex	2.19
188158_at	gei-16	GEX Interacting protein	nematode larval development /// embryonic development ending in birth or egg hatching /// molting cycle, collagen and cuticulin-based cuticle /// growth /// positive regulation of growth rate	protein binding	---	2.2
188169_at	hmg-12	HMG /// locus:hmg-12	embryonic development ending in birth or egg hatching	DNA binding	nucleus	1.94
188172_at	lipase	lipase	lipid metabolic process	triacylglycerol lipase activity	---	-2.1
188177_at	lipase	lipase	lipid metabolic process /// positive regulation of growth rate	---	---	2.24
188185_at	lin-25	abnormal cell LINeage /// locus:lin-25	cytokinesis /// cell fate specification /// nematode larval development /// defense response /// multicellular organismal development /// cell differentiation /// defecation /// positive regulation of growth rate /// vulval development /// positive regulation of vulval development /// hermaphrodite genitalia development	---	nucleus /// cytoplasm	2.02
188190_at	tat-3	Transbilayer Amphipath Transporters (subfamily IV P-type ATPase) /// locus:tat-3	ATP biosynthetic process /// transport /// phospholipid transport	magnesium ion binding /// phospholipid-translocating ATPase activity /// ATP binding /// ATPase activity, coupled to transmembrane movement of ions, phosphorylative mechanism /// hydrolase activity, acting on acid anhydrides, catalyzing transmembrane movement of substances	membrane /// integral to membrane	2.32
188199_s_at	tra-2	TRAnsformer : XX animals transformed into males	reproduction /// morphogenesis of an epithelium /// multicellular organismal development /// spermatogenesis /// sex determination /// sex determination /// cell differentiation /// positive regulation of growth rate /// hermaphrodite germ-line sex determination /// hermaphrodite genitalia development /// hermaphrodite somatic sex determination /// hermaphrodite somatic sex determination	receptor activity /// receptor activity /// protein binding	cytoplasm /// membrane /// integral to membrane /// integral to membrane	1.87
188217_at	ptr-22	PaTched Related family /// locus:ptr-22	molting cycle, collagen and cuticulin-based cuticle /// locomotion /// positive regulation of multicellular organism growth	hedgehog receptor activity	membrane /// integral to membrane	-1.86
188227_at	ssq-2	Sperm-Specific family, class Q /// locus:ssq-2	locomotion	---	---	2.07
188234_s_at	snf-5	Sodium:Neurotransmitter symporter Family /// locus:snf-5	transport /// neurotransmitter transport	neurotransmitter:sodium symporter activity /// symporter activity	integral to plasma membrane /// membrane /// integral to membrane	1.84
188239_s_at	mab-21	Male ABnormal /// locus:mab-21	multicellular organismal development /// embryonic development /// embryonic development ending in birth or egg hatching /// cell differentiation /// positive regulation of growth rate /// cell fate commitment	---	---	-1.84
188240_at	ptr-6	PaTched Related family /// locus:ptr-6	embryonic development ending in birth or egg hatching /// molting cycle, collagen and cuticulin-based cuticle /// locomotion /// positive regulation of multicellular organism growth	hedgehog receptor activity	membrane /// integral to membrane	2.42
188250_at	col-158	COLlagen /// locus:col-158	embryonic development ending in birth or egg hatching	structural constituent of cuticle	integral to membrane	-2.34
188271_at	let-363	LEThal	reproduction /// nematode larval development /// regulation of translation /// regulation of translation /// determination of adult life span /// embryonic development ending in birth or egg hatching /// growth /// positive regulation of growth rate	binding /// kinase activity /// transferase activity /// transferase activity, transferring phosphorus-containing groups /// phosphotransferase activity, alcohol group as acceptor	nucleus	3.12
188278_s_at	tni-3	TropoNin I /// locus:tni-3	nematode larval development /// muscle contraction /// oviposition /// post-embryonic body morphogenesis	actin binding /// protein binding	---	-1.94
188281_s_at	col-81	COLlagen /// locus:col-81	---	---	integral to membrane	2.33
188282_at	hsp-16.2	Heat Shock Protein /// locus:hsp-16.2	response to stress /// determination of adult life span /// response to heat /// endoplasmic reticulum unfolded protein response /// positive regulation of growth rate	---	---	-11.6
188296_at	ags-3	Activator of G protein Signalling	signal transduction	GTPase activator activity /// binding /// protein binding	---	1.89
188308_s_at	DnaJ	DnaJ	---	---	---	2.28
188311_s_at	ram-2	abnormal RAy Morphology /// locus:ram-2	sensory organ development /// embryonic development ending in birth or egg hatching /// cell migration	structural constituent of cuticle	integral to membrane	4.63
188314_at	ins-4	INSulin related /// locus:ins-4	---	hormone activity	extracellular region	-1.97
188339_at	col-123	COLlagen /// locus:col-123	---	structural constituent of cuticle	integral to membrane	-3.63
188353_s_at	flp-12	FMRF-Like Peptide	---	---	---	-4.12
188356_at	col-98	COLlagen /// locus:col-98	body morphogenesis /// locomotion	structural constituent of cuticle	integral to membrane	3.17
188360_at	clu-1	yeast CLU (mitochondrial clustering) related /// locus:clu-1	translation /// embryonic development ending in birth or egg hatching	translation initiation factor activity	---	4.26
188373_at	tbx-32	T BoX family /// locus:tbx-32	regulation of transcription, DNA-dependent /// regulation of transcription	DNA binding /// transcription factor activity	nucleus	-1.95
188375_at	col-153	COLlagen /// locus:col-153	---	structural constituent of cuticle	integral to membrane	-2.04
188379_at	fibrillin	fibrillin	---	---	---	-4.33
188380_at	chitinase	chitinase	carbohydrate metabolic process	catalytic activity /// hydrolase activity, hydrolyzing O-glycosyl compounds /// cation binding	---	-3.09
188390_at	ptr-11	PaTched Related family /// locus:ptr-11	locomotion /// positive regulation of multicellular organism growth /// vulval development	hedgehog receptor activity	membrane /// integral to membrane	1.86
188393_at	flp-10	FMRF-Like Peptide /// locus:flp-10	---	---	integral to membrane	-2.61
[truncated: 817 more rows]
