# Supplementary material for: A Two-tiered compensatory response to loss of DNA repair modulates aging and stress response pathways
Source: Aging (Albany NY). 2010 Mar 29;2(3):133–59. doi: 10.18632/aging.100127 (PMC2871243; doi:10.18632/aging.100127)
Supplement: Supplementary Table 4 [file aging-02-133-s004.xls]

## Sheet: N2 vs nth-1;xpa-1
Comparative results from wildtype N2 vs nth-1;xpa-1
Probe Set ID	Gene Symbol	Gene Title	go biological process term	go molecular function term	go cellular component term	fold change
171723_x_at	vit-4	VITellogenin structural genes (yolk protein genes) /// locus:vit-4	lipid transport /// embryonic development ending in birth or egg hatching /// positive regulation of growth rate	lipid transporter activity /// nutrient reservoir activity	extracellular region	-2.19
171728_x_at	ncx-2	Na/Ca eXchangers	calcium ion transport /// cell communication /// positive regulation of growth rate	calcium:sodium antiporter activity	membrane /// integral to membrane	4.07
171738_x_at	unc-44	UNCoordinated	carbohydrate metabolic process /// signal transduction /// body morphogenesis /// positive regulation of growth rate /// locomotion /// positive regulation of locomotion /// positive regulation of multicellular organism growth	hydrolase activity, hydrolyzing O-glycosyl compounds /// protein binding /// protein binding	---	2.27
171739_x_at	F35A5.1	hypothetical protein /// status:Partially_confirmed	---	---	---	2.17
171751_x_at	C38D4.1	hypothetical protein	---	---	integral to membrane	-1.83
171754_x_at	Y15E3A.4	status:Confirmed /// hypothetical protein	transport	transporter activity	integral to membrane	3.28
171758_x_at	F49E2.5	hypothetical protein	nematode larval development	---	---	1.84
171764_x_at	clh-1	CLC-type chloride cHannel	chloride transport	ion channel activity /// voltage-gated chloride channel activity	membrane /// integral to membrane	1.99
171769_x_at	F23F12.12	hypothetical protein /// status:Confirmed	---	---	integral to membrane	1.81
171783_x_at	ubc-1	UBiquitin Conjugating enzyme /// locus:ubc-1	nematode larval development /// ubiquitin-dependent protein catabolic process /// growth /// post-translational protein modification /// regulation of protein metabolic process	ubiquitin-protein ligase activity /// protein binding /// ligase activity /// small conjugating protein ligase activity	---	3.63
171791_at	lrp-1	Low-density lipoprotein Receptor Related /// locus:lrp-1	morphogenesis of an epithelium /// nematode larval development /// endocytosis /// metabolic process /// body morphogenesis /// sterol transport /// cell migration /// molting cycle, collagen and cuticulin-based cuticle /// growth /// positive regulation of growth rate /// locomotion /// positive regulation of locomotion /// positive regulation of multicellular organism growth /// ecdysis, collag…	receptor activity /// calcium ion binding /// sterol transporter activity /// transferase activity	coated pit /// membrane /// integral to membrane	1.9
171792_x_at	tni-3	TropoNin I /// locus:tni-3	nematode larval development /// muscle contraction /// oviposition /// post-embryonic body morphogenesis	actin binding /// protein binding	---	2.6
171808_x_at	F11C1.5	hypothetical protein	translation	nucleotide binding /// structural constituent of ribosome /// ATP binding /// ATPase activity /// nucleoside-triphosphatase activity	intracellular /// ribosome	2.3
171811_s_at	K01D12.15	hypothetical protein /// hypothetical protein /// status:Confirmed /// status:Confirmed	---	---	---	3.13
171811_s_at	K01D12.7	hypothetical protein /// hypothetical protein /// status:Confirmed /// status:Confirmed	---	---	---	3.13
171839_x_at	ztf-3	locus:ztf-3 /// Zinc finger Transcription Factor family	embryonic development ending in birth or egg hatching /// collagen and cuticulin-based cuticle development /// positive regulation of multicellular organism growth	nucleic acid binding /// zinc ion binding	intracellular	2.09
171840_x_at	ifc-2	Intermediate Filament, C	morphogenesis of an epithelium /// determination of adult life span /// body morphogenesis /// molting cycle, collagen and cuticulin-based cuticle /// collagen and cuticulin-based cuticle development /// positive regulation of growth rate /// locomotion /// positive regulation of multicellular organism growth	structural molecule activity /// protein binding	cytoplasm /// intermediate filament	-2.02
171841_x_at	hlh-11	Helix Loop Helix	transcription /// regulation of transcription, DNA-dependent /// regulation of transcription	DNA binding /// transcription regulator activity	nucleus	2.1
171848_x_at	tdc-1	Tyrosine DeCarboxylase	cellular amino acid and derivative metabolic process /// carboxylic acid metabolic process	catalytic activity /// carboxy-lyase activity /// pyridoxal phosphate binding	---	-2.02
171849_x_at	flp-15	FMRF-Like Peptide /// locus:flp-15	---	---	---	2.27
171858_x_at	rfc-2	RFC (DNA replication factor) family /// locus:rfc-2	reproduction /// DNA replication /// embryonic development ending in birth or egg hatching /// locomotion	nucleotide binding /// DNA binding /// DNA clamp loader activity /// protein binding /// ATP binding /// nucleoside-triphosphatase activity	nucleus /// DNA replication factor C complex	-1.97
171862_s_at	R08E3.1	hypothetical protein	---	---	---	-1.89
171877_x_at	ida-1	related to Islet cell Diabetes Autoantigen /// locus:ida-1	protein amino acid dephosphorylation /// proteolysis /// exocytosis /// dephosphorylation	serine-type endopeptidase activity /// protein tyrosine phosphatase activity /// phosphatase activity	integral to membrane /// trans-Golgi network transport vesicle	2.15
171880_x_at	nspd-3 nspd-6	Nematode Specific Peptide family, group D /// Nematode Specific Peptide family, group D /// locus:nspd-3 /// locus:nspd-6	body morphogenesis /// positive regulation of growth rate	---	---	2.14
171883_x_at	K02F6.7	hypothetical protein /// status:Partially_confirmed	---	---	---	-2.54
171890_x_at	klp-4	Kinesin-Like Protein	microtubule-based movement	nucleotide binding /// microtubule motor activity /// protein binding /// ATP binding	microtubule associated complex	1.9
171893_x_at	mcm-3	yeast MCM (licensing factor) related /// locus:mcm-3	reproduction /// cytokinesis /// DNA replication initiation /// embryonic development ending in birth or egg hatching /// hermaphrodite genitalia development /// cell division	nucleotide binding /// DNA binding /// ATP binding /// nucleoside-triphosphatase activity	nucleus	-1.89
171896_x_at	F44D12.3	hypothetical protein /// hypothetical protein /// hypothetical protein /// status:Confirmed /// status:Confirmed /// status:Predicted	---	structural molecule activity	---	2.12
171896_x_at	F44D12.5	hypothetical protein /// hypothetical protein /// hypothetical protein /// status:Confirmed /// status:Confirmed /// status:Predicted	---	structural molecule activity	---	2.12
171896_x_at	F44D12.7	hypothetical protein /// hypothetical protein /// hypothetical protein /// status:Confirmed /// status:Confirmed /// status:Predicted	---	structural molecule activity	---	2.12
171899_x_at	rpa-1	Replication Protein A homolog /// locus:rpa-1	DNA replication /// embryonic development ending in birth or egg hatching	nucleic acid binding /// DNA binding /// protein binding /// zinc ion binding /// metal ion binding	nucleus	-1.84
171900_s_at	helicase	hypothetical protein /// helicase	nematode larval development /// growth	nucleic acid binding /// helicase activity /// ATP binding /// ATP-dependent helicase activity	---	1.86
171903_x_at	C16C10.3	Hypothetical protein (C16C10.3)	nematode larval development /// growth	---	---	-2.18
171911_x_at	F53F4.11	hypothetical protein /// status:Confirmed	reproduction /// nematode larval development /// RNA processing /// translation /// embryonic development ending in birth or egg hatching /// growth /// positive regulation of growth rate /// hermaphrodite genitalia development	RNA binding /// structural constituent of ribosome	intracellular /// ribosome	1.96
171918_x_at	Y17G7B.10	hypothetical protein	metabolic process	NAD+ kinase activity	---	1.84
171932_x_at	F09C8.1	hypothetical protein /// phospholipase precursor	lipid metabolic process	hydrolase activity, acting on ester bonds	integral to membrane	-6.06
171935_s_at	D1044.2	hypothetical protein	cell-matrix adhesion	calcium ion binding	membrane /// integral to membrane	-1.87
171956_s_at	ptr-23	PaTched Related family /// locus:ptr-23	molting cycle, collagen and cuticulin-based cuticle /// locomotion /// vulval development	hedgehog receptor activity	membrane /// integral to membrane	1.93
171965_x_at	tag-349	Temporarily Assigned Gene name	---	zinc ion binding	---	-1.83
171970_x_at	H39E23.3	hypothetical protein /// status:Partially_confirmed	---	---	---	-2.61
171980_x_at	T22B3.2	hypothetical protein /// Temporarily Assigned Gene name	---	nucleic acid binding /// hydrogen ion transmembrane transporter activity	proton-transporting two-sector ATPase complex	2.7
171985_x_at	hda-1	Histone DeAcetylase family member (hda-1) (hda-1)	reproduction /// negative regulation of transcription from RNA polymerase II promoter /// gonad development /// embryonic development ending in birth or egg hatching /// histone deacetylation /// positive regulation of growth rate /// negative regulation of vulval development /// negative regulation of vulval development /// hermaphrodite genitalia development /// regulation of cell differentiati…	histone deacetylase activity	nucleus	-2.26
171989_x_at	puf-12	PUF (Pumilio/FBF) domain-containing /// locus:puf-12	oviposition	RNA binding /// binding	---	2.12
171993_x_at	daf-5	abnormal DAuer Formation /// locus:daf-5	negative regulation of transcription from RNA polymerase II promoter	binding /// protein binding	nucleus	2.08
171996_x_at	egl-15	EGg Laying defective	nematode larval development /// protein amino acid phosphorylation /// multicellular organismal development /// muscle development /// fibroblast growth factor receptor signaling pathway /// embryonic development ending in birth or egg hatching /// cell migration /// oviposition /// regulation of cell projection organization /// positive regulation of growth rate /// locomotion /// hermaphrodite …	nucleotide binding /// protein kinase activity /// protein serine/threonine kinase activity /// protein tyrosine kinase activity /// transmembrane receptor protein tyrosine kinase activity /// receptor activity /// ATP binding /// kinase activity /// transferase activity /// manganese ion binding /// metal ion binding	membrane /// integral to membrane	2.28
171998_x_at	unc-13	UNCoordinated	intracellular signaling cascade /// positive regulation of growth rate /// locomotion /// regulation of pharyngeal pumping /// regulation of pharyngeal pumping /// regulation of oviposition /// regulation of oviposition	zinc ion binding /// diacylglycerol binding /// metal ion binding	---	2.55
172004_x_at	unc-87	UNCoordinated	locomotion	protein binding	---	1.93
172009_x_at	Y56A3A.18	status:Confirmed /// hypothetical protein	reproduction /// nematode larval development /// embryonic development ending in birth or egg hatching /// growth /// positive regulation of growth rate	zinc ion binding /// metal ion binding	intracellular	3.02
172015_x_at	Y82E9BR.17	hypothetical protein	---	zinc ion binding	intracellular	-2.87
172024_x_at	clh-1	CLC-type chloride cHannel	chloride transport	ion channel activity /// voltage-gated chloride channel activity	membrane /// integral to membrane	2.1
172027_x_at	csp-2	CaSPase /// locus:csp-2	proteolysis /// apoptosis	cysteine-type endopeptidase activity /// cysteine-type peptidase activity	integral to membrane	2.61
172053_x_at	---	---	---	---	---	1.93
172055_x_at	his-12 his-16 his-19 his-20 his-21 his-22 his-29 his-3 his-30 his-33 his-34 his-4 his-43 his-51 his-52 his-53 his-54 his-57 his-65 his-7 his-8	HIStone /// HIStone /// HIStone /// HIStone /// HIStone /// HIStone /// HIStone /// HIStone /// HIStone /// HIStone /// HIStone /// HIStone /// HIStone /// HIStone /// HIStone /// HIStone /// HIStone /// HIStone /// HIStone /// HIStone /// HIStone /// locus:his-3 /// locus:his-4 /// locus:his-7 /// locus:his-8 /// locus:his-12 /// locus:his-16 /// locus:his-19 /// locus:his-20 /// locus:his-21 //…	reproduction /// nematode larval development /// nucleosome assembly /// defense response /// nucleus organization /// embryonic development ending in birth or egg hatching /// oviposition /// growth /// positive regulation of growth rate /// locomotion /// hermaphrodite genitalia development	DNA binding	nucleosome /// nucleus /// chromosome	2.26
172075_x_at	---	---	---	---	---	1.86
172078_x_at	---	---	---	---	---	2.5
172093_x_at	Y54B9A.1	status:Predicted /// hypothetical protein	---	---	---	2.33
172098_x_at	Y47D7A.2	status:Partially_confirmed /// hypothetical protein	---	---	---	1.89
172101_x_at	ptl-1	Protein with Tau-Like repeats	negative regulation of microtubule depolymerization	protein binding	---	3.08
172102_x_at	---	---	---	---	---	2.35
172107_x_at	Y54F10AM.7	status:Confirmed /// hypothetical protein	lipid catabolic process	hydrolase activity	extracellular region	2.16
172127_x_at	ptl-1	Protein with Tau-Like repeats	negative regulation of microtubule depolymerization	protein binding	---	2.26
172133_x_at	vit-3	VITellogenin structural genes (yolk protein genes) /// locus:vit-3	lipid transport /// embryonic development ending in birth or egg hatching /// positive regulation of growth rate	lipid transporter activity /// nutrient reservoir activity	extracellular region	-2.2
172134_x_at	vit-4	VITellogenin structural genes (yolk protein genes) /// locus:vit-4	lipid transport /// embryonic development ending in birth or egg hatching /// positive regulation of growth rate	lipid transporter activity /// nutrient reservoir activity	extracellular region	-2.15
172136_x_at	Y71D11A.4	---	---	---	---	2.16
172140_x_at	dlc-4	Dynein Light Chain /// locus:dlc-4	microtubule-based process	microtubule motor activity	microtubule associated complex	3.61
172146_x_at	F38H4.6	hypothetical protein /// hypothetical protein /// status:Predicted /// status:Predicted /// status:Predicted /// hypothetical protein	---	structural molecule activity	---	4.4
172146_x_at	R05D3.5	hypothetical protein /// hypothetical protein /// status:Predicted /// status:Predicted /// status:Predicted /// hypothetical protein	---	structural molecule activity	---	4.4
172148_x_at	Y54F10AM.7	---	---	---	---	2.2
172154_x_at	---	---	---	---	---	2.36
172156_x_at		status:Confirmed /// hypothetical protein	---	---	integral to membrane	-2.21
172184_x_at	clec-174	C-type LECtin /// locus:clec-174	---	binding	---	-9.98
172194_x_at	ZK262.4	status:Partially_confirmed /// hypothetical protein	---	---	---	1.83
172200_x_at	C28D4.5	hypothetical protein /// status:Partially_confirmed	---	---	---	2.34
172201_x_at	ZC376.8	status:Partially_confirmed /// hypothetical protein	reproduction	---	integral to membrane	2.93
172213_x_at	C27C7.1	hypothetical protein /// status:Confirmed	---	---	---	-2.52
172214_x_at	flp-15	FMRF-Like Peptide /// locus:flp-15	---	---	---	2.06
172218_x_at	dod-6	Downstream Of DAF-16 (regulated by DAF-16) /// locus:dod-6	determination of adult life span	---	integral to membrane	-1.94
172229_x_at	T16A9.5	hypothetical protein /// status:Confirmed	---	---	integral to membrane	2.75
172232_x_at	nspa-9	Nematode Specific Peptide family/group A /// locus:nspa-9	---	---	integral to membrane	2.98
172233_at	T02D1.7	hypothetical protein /// status:Partially_confirmed	---	---	---	-3.5
172234_x_at	C41G7.6	hypothetical protein /// status:Confirmed	---	---	---	2.21
172235_x_at	ZK84.5	status:Partially_confirmed /// hypothetical protein	---	---	---	1.98
172239_x_at	---	---	---	---	---	-1.99
172245_x_at	nspd-2	Nematode Specific Peptide family, group D /// locus:nspd-2	---	---	---	2.5
172248_x_at	T20G5.8	hypothetical protein /// status:Confirmed	determination of adult life span	---	integral to membrane	-2.76
172254_x_at	nspd-7	Nematode Specific Peptide family, group D /// locus:nspd-7	---	---	---	1.91
172296_x_at	nuo-1	NADH Ubiquinone Oxidoreductase /// locus:nuo-1	reproduction /// nematode larval development /// mitochondrial electron transport, NADH to ubiquinone /// mitochondrial electron transport, NADH to ubiquinone /// determination of adult life span /// gonad development /// embryonic development ending in birth or egg hatching /// defecation /// mitochondrial respiratory chain complex assembly /// growth /// positive regulation of growth rate /// p…	NADH dehydrogenase (ubiquinone) activity /// FMN binding /// oxidoreductase activity, acting on NADH or NADPH /// NAD binding /// 4 iron, 4 sulfur cluster binding	---	1.92
172297_x_at	T23F11.2	hypothetical protein /// status:Confirmed	---	---	---	2.36
172298_x_at	F49E2.5	hypothetical protein	nematode larval development	---	---	1.91
172302_x_at	F07E5.4	hypothetical protein /// status:Partially_confirmed	---	---	---	2.39
172317_x_at	Y67A6A.1	status:Partially_confirmed /// hypothetical protein	---	---	---	2.1
172327_x_at	F44D12.3	hypothetical protein /// hypothetical protein /// status:Confirmed /// status:Predicted	---	structural molecule activity	---	1.96
172327_x_at	F44D12.7	hypothetical protein /// hypothetical protein /// status:Confirmed /// status:Predicted	---	structural molecule activity	---	1.96
172330_x_at	---	---	---	---	---	1.9
172332_at	T24D8.6	hypothetical protein /// status:Partially_confirmed	---	---	---	2.44
172333_x_at	F44D12.5	hypothetical protein /// status:Confirmed	---	structural molecule activity	---	2
172335_x_at	F56A4.8	---	---	---	---	2.28
172340_x_at	C35B1.3	hypothetical protein /// status:Confirmed	---	---	integral to membrane	-15.9
172351_x_at	T02H6.3	---	---	---	---	2.43
172352_at	C33A12.4	hypothetical protein /// status:Confirmed	---	---	---	2.13
172367_x_at	math-26	MATH (meprin-associated Traf homology) domain containing /// locus:math-26	---	---	---	1.86
172371_x_at	F44E7.3	hypothetical protein /// status:Partially_confirmed	---	---	---	3.73
172380_x_at	F47B3.2	hypothetical protein /// hypothetical protein /// status:Partially_confirmed /// status:Partially_confirmed	protein amino acid dephosphorylation /// dephosphorylation	protein tyrosine phosphatase activity /// phosphatase activity	---	2.9
172380_x_at	F47B3.7	hypothetical protein /// hypothetical protein /// status:Partially_confirmed /// status:Partially_confirmed	protein amino acid dephosphorylation /// dephosphorylation	protein tyrosine phosphatase activity /// phosphatase activity	---	2.9
172381_x_at	nspd-1	Nematode Specific Peptide family, group D /// locus:nspd-1	---	---	---	1.93
172384_x_at	---	---	---	---	---	-4.41
172385_x_at	F41G3.1	hypothetical protein /// status:Confirmed	---	---	integral to membrane	2.09
172387_x_at	---	---	---	---	---	1.88
172388_x_at	nlp-27	Neuropeptide-Like Protein /// locus:nlp-27	neuropeptide signaling pathway	---	integral to membrane	2.12
172389_x_at	Y43D4A.3	hypothetical protein /// hypothetical protein	transport	transporter activity	integral to membrane	-2.02
172389_x_at	Y43D4A.4	hypothetical protein /// hypothetical protein	transport	transporter activity	integral to membrane	-2.02
172396_at	F27C1.10	hypothetical protein /// status:Partially_confirmed	---	---	---	1.84
172400_x_at	ilys-5	Invertebrate LYSozyme	embryonic development ending in birth or egg hatching	lysozyme activity	---	-4.7
172403_x_at	math-27	MATH (meprin-associated Traf homology) domain containing	---	---	---	2.1
172405_x_at	cnc-3	CaeNaCin (Caenorhabditis bacteriocin) /// locus:cnc-3	---	---	integral to membrane	-3.17
172408_x_at	ZK402.1	status:Predicted /// hypothetical protein	---	---	integral to membrane	2.15
172411_x_at	T24A6.1	hypothetical protein /// status:Predicted	---	---	---	-2.03
172413_at	F52E10.3	hypothetical protein /// status:Predicted	---	---	---	2.67
172418_x_at	F47B3.4	hypothetical protein /// hypothetical protein /// status:Partially_confirmed /// status:Predicted	---	---	integral to membrane	2.09
172418_x_at	F47B3.5	hypothetical protein /// hypothetical protein /// status:Partially_confirmed /// status:Predicted	---	---	integral to membrane	2.09
172425_x_at	cyp-42A1	CYtochrome P450 family /// locus:cyp-42A1	nematode larval development /// embryonic development ending in birth or egg hatching /// body morphogenesis /// growth /// locomotion /// positive regulation of multicellular organism growth	monooxygenase activity /// iron ion binding /// electron carrier activity /// heme binding	integral to membrane	1.96
172429_x_at	F52E10.4	hypothetical protein /// status:Partially_confirmed	---	---	---	2.82
172431_x_at	nspa-1 nspa-2 nspa-3 nspa-4 nspa-5 nspa-8	Nematode Specific Peptide family/group A /// Nematode Specific Peptide family/group A /// Nematode Specific Peptide family/group A /// Nematode Specific Peptide family/group A /// Nematode Specific Peptide family/group A /// Nematode Specific Peptide family/group A /// locus:nspa-1 /// locus:nspa-8 /// locus:nspa-5 /// locus:nspa-3 /// locus:nspa-2 /// locus:nspa-4	---	---	integral to membrane	2.79
172437_x_at	cnc-2	CaeNaCin (Caenorhabditis bacteriocin) /// locus:cnc-2	---	---	integral to membrane	2.36
172446_x_at	T16A1.5	hypothetical protein /// status:Predicted	---	---	---	3.08
172454_x_at	F18E9.6	hypothetical protein /// status:Predicted	---	---	---	1.83
172467_x_at	C34G6.3	hypothetical protein /// status:Confirmed	---	---	---	3.02
172468_x_at	K01A2.9	hypothetical protein /// status:Predicted	---	---	integral to membrane	-1.81
172477_x_at	K01D12.7	hypothetical protein /// status:Confirmed /// status:Confirmed	---	---	---	2.84
172481_x_at	math-3	MATH (meprin-associated Traf homology) domain containing	---	---	---	2.14
172486_x_at	nspd-4	Nematode Specific Peptide family, group D /// locus:nspd-4	body morphogenesis /// positive regulation of growth rate	---	---	2.1
172490_at	F39F10.4	hypothetical protein /// status:Confirmed	---	---	---	-2.12
172499_x_at	F07G11.2	hypothetical protein /// status:Predicted	---	---	---	-2.25
172500_x_at	---	---	---	---	---	-3.48
172519_x_at	F52F10.1	hypothetical protein /// status:Confirmed	---	---	---	2.64
172527_x_at	nspd-6	Nematode Specific Peptide family, group D /// locus:nspd-3 /// locus:nspd-6	---	---	---	2.3
172546_x_at	nspd-5	Nematode Specific Peptide family, group D /// locus:nspd-5 /// locus:nspd-4	body morphogenesis /// positive regulation of growth rate	---	---	2.14
172550_x_at	H11L12.1	hypothetical protein /// status:Partially_confirmed	---	---	---	-2.84
172555_x_at	K01D12.15	hypothetical protein /// status:Confirmed /// status:Confirmed	---	---	---	3.19
172561_x_at	F52E1.12	---	---	---	---	1.98
172562_x_at	---	---	---	---	---	2.01
172564_x_at	F26A10.1	hypothetical protein /// status:Partially_confirmed	---	---	integral to membrane	3.15
172569_x_at	nspd-3	Nematode Specific Peptide family, group D /// locus:nspd-3 /// locus:nspd-6	---	---	---	2.22
172575_x_at	C13A2.10	hypothetical protein /// status:Partially_confirmed	---	---	---	-2.69
172579_x_at	F59E12.6	hypothetical protein	ubiquitin-dependent protein catabolic process /// embryonic development ending in birth or egg hatching	ubiquitin thiolesterase activity	---	1.8
172581_s_at	F32D8.12	hypothetical protein	---	catalytic activity /// oxidoreductase activity /// FAD binding	---	2.12
172583_x_at	fbxa-24	F-box A protein /// locus:fbxa-24	---	---	---	4.12
172588_x_at	flp-21	FMRF-Like Peptide /// locus:flp-21	---	---	---	3.26
172589_x_at	fbxa-67	F-box A protein /// locus:fbxa-67	---	---	---	2.23
172593_x_at	F45D11.2	---	---	---	---	-3.09
172606_x_at	Y59E9AL.6	status:Confirmed /// hypothetical protein	---	---	---	2.49
172610_x_at	ZC239.14	status:Partially_confirmed /// hypothetical protein	potassium ion transport	voltage-gated potassium channel activity /// protein binding	voltage-gated potassium channel complex /// membrane	-1.99
172615_x_at	cyb-2.2	CYclin B /// locus:cyb-2.2	reproduction /// cytokinesis /// oocyte maturation /// nematode larval development /// embryonic development ending in birth or egg hatching /// growth /// locomotion /// negative regulation of multicellular organism growth /// cell division	---	nucleus	-2.02
172616_x_at	Y116A8C.41	---	---	---	---	2.31
172622_x_at	W04E12.7	hypothetical protein /// status:Confirmed	---	---	---	6.24
172623_at	Y105C5A.10	status:Partially_confirmed /// hypothetical protein	---	---	---	-2.16
172628_x_at	nspe-5	locus:nspe-5 /// hypothetical protein	---	---	integral to membrane	3.8
172630_x_at	C35D10.11	hypothetical protein /// status:Confirmed	---	structural molecule activity	---	2.13
172635_x_at	nspe-7	locus:nspe-7 /// hypothetical protein	---	---	integral to membrane	1.87
172653_at	C28H8.2	hypothetical protein /// status:Confirmed	---	---	---	4.6
172654_x_at	Y71F9B.13	hypothetical protein	---	---	---	2.12
172656_x_at	Y71F9B.13	hypothetical protein	---	---	---	2.44
172657_x_at	C03B8.2	hypothetical protein /// status:Predicted	embryonic development ending in birth or egg hatching	---	---	-1.86
172676_x_at	---	---	---	---	---	2.22
172682_x_at	ZC155.4	status:Partially_confirmed /// hypothetical protein	glycerol metabolic process /// lipid metabolic process /// positive regulation of growth rate	phosphoric diester hydrolase activity /// glycerophosphodiester phosphodiesterase activity	integral to membrane	-1.89
172685_x_at	his-20 his-22 his-52 his-54 his-8	HIStone /// HIStone /// HIStone /// HIStone /// HIStone /// locus:his-8 /// locus:his-20 /// locus:his-22 /// locus:his-52 /// locus:his-54	nematode larval development /// nucleosome assembly /// embryonic development ending in birth or egg hatching /// growth /// positive regulation of growth rate /// locomotion	DNA binding	nucleosome /// nucleus /// chromosome	1.91
172686_x_at	F12A10.7	hypothetical protein /// status:Predicted	---	---	---	2.1
172689_x_at	---	---	---	---	---	1.86
172695_x_at	ssq-3	Sperm-Specific family, class Q /// locus:ssq-3	---	---	---	1.86
172696_x_at	vit-5	VITellogenin structural genes (yolk protein genes) /// locus:vit-5	lipid transport /// determination of adult life span /// embryonic development ending in birth or egg hatching /// positive regulation of growth rate	lipid transporter activity /// nutrient reservoir activity	extracellular region	-2.16
172702_x_at	his-62	HIStone /// locus:his-62	reproduction /// nematode larval development /// nucleosome assembly /// embryonic development ending in birth or egg hatching /// growth /// positive regulation of growth rate /// locomotion /// hermaphrodite genitalia development	DNA binding	nucleosome /// nucleus /// chromosome	2.94
172708_x_at	---	---	---	---	---	2.24
172712_x_at	W02B3.6	---	---	---	---	2.14
172719_x_at	ssp-31	Sperm-Specific family, class P /// locus:ssp-31	---	structural molecule activity /// protein binding	---	1.92
172731_x_at	T27E7.7	---	---	---	---	2.25
172737_x_at	efk-1	Elongation Factor Kinase	protein amino acid phosphorylation	nucleotide binding /// protein serine/threonine kinase activity /// elongation factor-2 kinase activity /// binding /// calcium ion binding /// calmodulin binding /// ATP binding /// kinase activity /// transferase activity	---	2
172738_x_at	cyb-2.1	CYclin B /// locus:cyb-2.1	reproduction /// cytokinesis /// oocyte maturation /// nematode larval development /// embryonic development ending in birth or egg hatching /// growth /// locomotion /// negative regulation of multicellular organism growth /// cell division	protein binding	nucleus	-2.1
172747_x_at	T26H8.1	---	---	---	---	2.23
172748_x_at	C14A6.4	---	---	---	---	2.27
172758_x_at	his-48	HIStone /// locus:his-48 /// locus:his-58 /// locus:his-66	reproduction /// nematode larval development /// nucleosome assembly /// embryonic development ending in birth or egg hatching /// growth /// positive regulation of growth rate /// locomotion /// hermaphrodite genitalia development	DNA binding	nucleosome /// nucleus /// chromosome	3.28
172760_x_at	---	---	---	---	---	2.34
172762_x_at	B0564.5	---	---	---	---	2.05
172765_x_at	ZK1225.3	---	---	---	---	2.25
172766_x_at	ZK563.3	---	---	---	---	2.18
172767_x_at	ZC132.1	---	---	---	---	2.13
172772_x_at	skr-13	SKp1 Related (ubiquitin ligase complex component) /// locus:skr-13	reproduction /// ubiquitin-dependent protein catabolic process /// meiotic chromosome segregation	protein binding	---	-3.51
172773_x_at	nhr-88	Clone yk667b12 nuclear receptor NHR-88	transcription /// regulation of transcription, DNA-dependent	DNA binding /// transcription factor activity /// steroid hormone receptor activity /// receptor activity /// ligand-dependent nuclear receptor activity /// zinc ion binding /// sequence-specific DNA binding /// metal ion binding	nucleus	4.63
172775_x_at	F25D7.4	hypothetical protein /// claustrin like	---	---	---	-2.11
172776_x_at	C36A4.5	hypothetical protein /// claustrin like	---	---	integral to membrane	-2.03
172778_x_at	his-68	HIStone /// locus:his-68	reproduction /// nematode larval development /// nucleosome assembly /// defense response /// nucleus organization /// embryonic development ending in birth or egg hatching /// oviposition /// growth /// positive regulation of growth rate /// locomotion /// hermaphrodite genitalia development	DNA binding	nucleosome /// nucleus /// chromosome	1.89
172781_x_at	skr-8	SKp1 Related (ubiquitin ligase complex component) /// locus:skr-8	reproduction /// nematode larval development /// ubiquitin-dependent protein catabolic process /// embryonic development ending in birth or egg hatching /// body morphogenesis /// growth /// positive regulation of growth rate	protein binding	---	-1.82
172782_x_at	skr-9	SKp1 Related (ubiquitin ligase complex component) /// locus:skr-9	reproduction /// nematode larval development /// ubiquitin-dependent protein catabolic process /// embryonic development ending in birth or egg hatching /// body morphogenesis /// growth /// positive regulation of growth rate	protein binding	---	-2
172790_x_at	cyp-13B1	CYtochrome P450 family	oxidation reduction	monooxygenase activity /// iron ion binding /// electron carrier activity /// oxidoreductase activity /// oxidoreductase activity /// heme binding /// metal ion binding	integral to membrane	4.79
172793_x_at	cpr-3	Cysteine PRotease related /// locus:cpr-3	proteolysis /// embryonic development ending in birth or egg hatching	cysteine-type endopeptidase activity /// peptidase activity /// cysteine-type peptidase activity /// hydrolase activity	---	-1.82
172797_x_at	C54H2.2	---	---	---	---	2.18
172824_x_at	his-4	HIStone /// locus:his-4	nematode larval development /// nucleosome assembly /// embryonic development ending in birth or egg hatching /// growth /// positive regulation of growth rate /// locomotion	DNA binding	nucleosome /// nucleus /// chromosome	2.15
172825_x_at	his-39	HIStone /// locus:his-39	nematode larval development /// nucleosome assembly /// embryonic development ending in birth or egg hatching /// growth /// positive regulation of growth rate /// locomotion	DNA binding	nucleosome /// nucleus /// chromosome	2.27
172835_x_at	his-12 his-16 his-43	HIStone /// HIStone /// HIStone /// locus:his-12 /// locus:his-16 /// locus:his-43	reproduction /// nematode larval development /// nucleosome assembly /// defense response /// nucleus organization /// embryonic development ending in birth or egg hatching /// oviposition /// growth /// positive regulation of growth rate /// locomotion /// hermaphrodite genitalia development	DNA binding	nucleosome /// nucleus /// chromosome	2.11
172849_x_at	C39D10.8	---	---	---	---	2.98
172851_x_at	his-29	HIStone /// HIStone /// locus:his-29 /// locus:his-34	reproduction /// nematode larval development /// nucleosome assembly /// embryonic development ending in birth or egg hatching /// growth /// locomotion	DNA binding	nucleosome /// nucleus /// chromosome	4.35
172851_x_at	his-34	HIStone /// HIStone /// locus:his-29 /// locus:his-34	reproduction /// nematode larval development /// nucleosome assembly /// embryonic development ending in birth or egg hatching /// growth /// locomotion	DNA binding	nucleosome /// nucleus /// chromosome	4.35
172856_x_at	egg-4	EGG sterile (unfertilizable) /// EGG sterile (unfertilizable) /// locus:egg-5 /// locus:egg-4	reproduction /// nematode larval development /// protein amino acid dephosphorylation /// embryonic development ending in birth or egg hatching /// dephosphorylation /// growth	protein tyrosine phosphatase activity /// phosphatase activity	---	-2.39
172856_x_at	egg-5	EGG sterile (unfertilizable) /// EGG sterile (unfertilizable) /// locus:egg-5 /// locus:egg-4	reproduction /// nematode larval development /// protein amino acid dephosphorylation /// embryonic development ending in birth or egg hatching /// dephosphorylation /// growth	protein tyrosine phosphatase activity /// phosphatase activity	---	-2.39
172858_x_at	C53C11.4	hypothetical protein /// S. muris microneme antigen	---	---	---	2.43
172860_x_at	his-30	HIStone /// HIStone /// locus:his-30 /// locus:his-33	reproduction /// nematode larval development /// nucleosome assembly /// defense response /// nucleus organization /// embryonic development ending in birth or egg hatching /// oviposition /// growth /// positive regulation of growth rate /// locomotion /// hermaphrodite genitalia development	DNA binding	nucleosome /// nucleus /// chromosome	2.08
172860_x_at	his-33	HIStone /// HIStone /// locus:his-30 /// locus:his-33	reproduction /// nematode larval development /// nucleosome assembly /// defense response /// nucleus organization /// embryonic development ending in birth or egg hatching /// oviposition /// growth /// positive regulation of growth rate /// locomotion /// hermaphrodite genitalia development	DNA binding	nucleosome /// nucleus /// chromosome	2.08
172871_x_at	his-13 his-17 his-2 his-25 his-27 his-32 his-42 his-45 his-49 his-55 his-59 his-6 his-63 his-9	HIStone /// HIStone /// HIStone /// HIStone /// HIStone /// HIStone /// HIStone /// HIStone /// HIStone /// HIStone /// HIStone /// HIStone /// HIStone /// HIStone /// locus:his-9 /// locus:his-13 /// locus:his-25	reproduction /// nematode larval development /// nucleosome assembly /// embryonic development ending in birth or egg hatching /// body morphogenesis /// growth /// positive regulation of growth rate /// locomotion	DNA binding	nucleosome /// nucleus /// chromosome	1.96
172874_x_at	his-8	HIStone /// locus:his-8 /// locus:his-20 /// locus:his-22 /// locus:his-52 /// locus:his-54	nematode larval development /// nucleosome assembly /// embryonic development ending in birth or egg hatching /// growth /// positive regulation of growth rate /// locomotion	DNA binding	nucleosome /// nucleus /// chromosome	2.81
172877_x_at	fkh-4	ForKHead transcription factor family /// locus:fkh-3 /// locus:fkh-4	regulation of transcription, DNA-dependent	DNA binding /// transcription factor activity /// sequence-specific DNA binding	nucleus	-1.89
172880_x_at	C55C3.4	hypothetical protein /// tyrosine-protein kinase	protein amino acid phosphorylation	nucleotide binding /// protein kinase activity /// protein serine/threonine kinase activity /// protein tyrosine kinase activity /// protein binding /// ATP binding /// kinase activity /// transferase activity	---	1.85
172891_x_at	his-48 his-58 his-66	HIStone /// HIStone /// HIStone /// locus:his-48 /// locus:his-58 /// locus:his-66	reproduction /// nematode larval development /// nucleosome assembly /// embryonic development ending in birth or egg hatching /// growth /// positive regulation of growth rate /// locomotion /// hermaphrodite genitalia development	DNA binding	nucleosome /// nucleus /// chromosome	3.12
172899_x_at	his-42	HIStone /// locus:his-42	reproduction /// nematode larval development /// nucleosome assembly /// embryonic development ending in birth or egg hatching /// body morphogenesis /// growth /// positive regulation of growth rate /// locomotion	DNA binding	nucleosome /// nucleus /// chromosome	1.85
172909_x_at	brc-1	BRCa homolog (tumor suppressor gene Brca1)	double-strand break repair via homologous recombination /// DNA repair /// DNA repair /// apoptosis /// response to DNA damage stimulus /// cell death /// positive regulation of growth rate /// meiotic chromosome segregation /// meiotic chromosome separation	DNA binding /// protein binding /// zinc ion binding	intracellular /// nucleus	-2.15
172912_x_at	clh-1	CLC-type chloride cHannel	chloride transport	ion channel activity /// voltage-gated chloride channel activity	membrane /// integral to membrane	2.13
172913_x_at	F11D11.9	---	---	---	---	2.17
172926_x_at	T05A7.9	hypothetical protein /// small histidine-alanine-rich protein precursor (SHARP)	---	---	---	2.05
172933_x_at	gsp-3	yeast Glc Seven-like Phosphatases /// locus:gsp-3	reproduction	phosphoprotein phosphatase activity /// hydrolase activity	---	1.91
172935_x_at	gsp-4	yeast Glc Seven-like Phosphatases /// locus:gsp-4	---	phosphoprotein phosphatase activity /// hydrolase activity	---	2
172961_x_at	mig-5	abnormal cell MIGration	morphogenesis of an epithelium /// mitotic spindle organization /// intracellular signaling cascade /// multicellular organismal development /// embryonic development ending in birth or egg hatching /// cell migration /// oviposition /// positive regulation of growth rate	signal transducer activity /// protein binding /// protein binding /// identical protein binding	intracellular	-1.82
172968_x_at	Y45F10C.5	---	---	---	---	2.31
172969_x_at	T05A7.9	---	---	---	---	2.35
172970_x_at	Y116A8B.2	---	---	---	---	2.21
172974_s_at	F19C7.1	hypothetical protein /// status:Confirmed	positive regulation of growth rate	---	---	-2.54
172986_s_at	ZC247.1	status:Partially_confirmed /// hypothetical protein	reproduction /// positive regulation of growth rate /// positive regulation of multicellular organism growth	---	---	2.12
172997_s_at	F56C9.7	hypothetical protein /// status:Confirmed	positive regulation of growth rate	---	---	-2.35
173008_s_at	nhr-88	Clone yk667b12 nuclear receptor NHR-88	transcription /// regulation of transcription, DNA-dependent	DNA binding /// transcription factor activity /// steroid hormone receptor activity /// receptor activity /// ligand-dependent nuclear receptor activity /// zinc ion binding /// sequence-specific DNA binding /// metal ion binding	nucleus	4.1
173018_s_at	pqn-59	Prion-like-(Q/N-rich)-domain-bearing protein /// locus:pqn-59	reproduction /// nematode larval development /// embryonic development ending in birth or egg hatching /// growth /// locomotion	protein binding	---	2.41
173019_s_at	kup-1	Kinase UPstream gene (in operon) /// locus:kup-1	---	---	---	-2.06
173027_s_at	Y67A10A.9	status:Partially_confirmed /// hypothetical protein	---	---	integral to membrane	1.82
173032_at	---	---	---	---	---	-2.08
173035_s_at	nas-9	Nematode AStacin protease	proteolysis /// embryonic development ending in birth or egg hatching	metalloendopeptidase activity /// peptidase activity /// metallopeptidase activity /// zinc ion binding /// hydrolase activity /// metal ion binding	extracellular region	2.42
173039_s_at	K07A12.2	hypothetical protein /// Rat insulin-like growth factor binding protien complex acid labile chain like	embryonic development ending in birth or egg hatching	protein binding	integral to membrane	-2
173051_s_at	ilys-5	Invertebrate LYSozyme	embryonic development ending in birth or egg hatching	lysozyme activity	---	-5.86
173058_s_at	R74.8	hypothetical protein	---	---	---	-1.8
173060_s_at	C34D4.3	hypothetical protein /// status:Confirmed	---	structural molecule activity	---	2.38
173068_at	scd-2	Suppressor of Constitutive Dauer formation /// locus:scd-2	protein amino acid phosphorylation /// positive regulation of growth rate /// dauer larval development	nucleotide binding /// protein kinase activity /// protein serine/threonine kinase activity /// protein tyrosine kinase activity /// ATP binding /// kinase activity /// transferase activity	membrane /// integral to membrane	2.26
173075_at	ptp-1	Protein Tyrosine Phosphatase	protein amino acid dephosphorylation /// dephosphorylation	phosphoprotein phosphatase activity /// protein tyrosine phosphatase activity /// binding /// protein binding /// cytoskeletal protein binding /// hydrolase activity /// phosphatase activity	cytoplasm /// cytoskeleton	2.71
173085_at	klc-2	Kinesin Light Chain	embryonic development ending in birth or egg hatching /// oviposition /// locomotion	motor activity /// microtubule motor activity /// binding /// protein binding	kinesin complex /// microtubule	1.87
173088_s_at	twk-5	TWiK family of potassium channels	transport /// ion transport /// potassium ion transport	ion channel activity /// potassium channel activity	membrane /// integral to membrane	2.76
173097_at	Y105E8A.3	status:Partially_confirmed /// hypothetical protein	cation transport	cation transmembrane transporter activity	membrane /// integral to membrane	-1.81
173103_s_at	K07B1.4	hypothetical protein	---	transferase activity, transferring acyl groups other than amino-acyl groups	integral to membrane	-1.98
173109_s_at	Y41D4B.26	status:Partially_confirmed /// hypothetical protein	---	---	---	-2.09
173120_s_at	npp-5	Nuclear Pore complex Protein /// locus:npp-5	transport	---	nuclear pore	-1.98
173121_s_at	K10B3.6	hypothetical protein	carbohydrate metabolic process /// glycerol metabolic process /// lipid metabolic process	catalytic activity /// phosphoric diester hydrolase activity /// glycerophosphodiester phosphodiesterase activity /// carbohydrate binding	integral to membrane	4.31
173125_s_at	unc-44	UNCoordinated	carbohydrate metabolic process /// signal transduction /// body morphogenesis /// positive regulation of growth rate /// locomotion /// positive regulation of locomotion /// positive regulation of multicellular organism growth	hydrolase activity, hydrolyzing O-glycosyl compounds /// protein binding /// protein binding	---	2.06
173127_at	Y15E3A.4	status:Confirmed /// hypothetical protein	transport	transporter activity	integral to membrane	3.51
173132_s_at	T06A1.1	hypothetical protein /// status:Partially_confirmed	---	---	integral to membrane	3.2
173134_at	---	---	---	---	---	-2.05
173143_s_at	M03C11.1	hypothetical protein /// cAMP-dependant protein kinase	protein amino acid phosphorylation	protein kinase activity /// protein serine/threonine kinase activity /// protein tyrosine kinase activity /// ATP binding	---	2.06
173144_at	clec-85	C-type LECtin /// locus:clec-85	---	binding /// sugar binding	---	-4.33
173154_s_at	T26F2.2	hypothetical protein /// status:Partially_confirmed	---	---	---	-3.43
173155_at	C31H1.8	hypothetical protein /// status:Partially_confirmed	embryonic development ending in birth or egg hatching	---	---	-2.02
173161_at	C06H5.7	hypothetical protein /// status:Confirmed	---	receptor activity	integral to membrane	1.91
173163_s_at	mnk-1	MAP kinase iNtegrating Kinase (MNK) homolog	protein amino acid phosphorylation	protein kinase activity /// protein serine/threonine kinase activity /// protein tyrosine kinase activity /// ATP binding	---	1.84
173170_s_at	viln-1	VILliN related /// locus:viln-1	cytoskeleton organization /// meiotic chromosome segregation	actin binding	---	-2.05
173199_at	Y82E9BR.5	status:Partially_confirmed /// hypothetical protein	---	---	---	1.85
173200_s_at	inx-2	INneXin /// locus:inx-2	---	---	plasma membrane /// gap junction /// membrane /// integral to membrane /// cell junction	-2.1
173204_s_at	ugt-46	UDP-GlucuronosylTransferase /// locus:ugt-46	metabolic process	protein binding /// glucuronosyltransferase activity /// transferase activity /// transferase activity, transferring glycosyl groups /// transferase activity, transferring hexosyl groups	membrane /// integral to membrane	4.88
173217_at	ldb-1	LIM domain Binding Protein	multicellular organismal development /// mechanosensory behavior /// embryonic development ending in birth or egg hatching /// positive regulation of growth rate /// locomotion /// vulval development /// hermaphrodite genitalia development	transcription cofactor activity	nucleus	1.97
173229_s_at	Y54E10BR.4	status:Confirmed /// hypothetical protein	reproduction /// nematode larval development /// growth /// positive regulation of growth rate /// hermaphrodite genitalia development	---	---	1.91
173230_s_at	snf-5	Sodium:Neurotransmitter symporter Family /// locus:snf-5	transport /// neurotransmitter transport	neurotransmitter:sodium symporter activity /// symporter activity	integral to plasma membrane /// membrane /// integral to membrane	2.03
173234_s_at	Y52B11A.10	status:Partially_confirmed /// hypothetical protein	nematode larval development /// RNA metabolic process /// growth /// positive regulation of multicellular organism growth	binding /// protein binding	---	2.19
173238_s_at	cpt-4	Carnitine Palmitoyl Transferase /// locus:cpt-4	proteolysis	cysteine-type endopeptidase activity /// acyltransferase activity /// transferase activity	---	-3.46
173277_at	K07B1.8	---	---	---	---	2.73
173283_s_at	T04D3.5	hypothetical protein /// status:Confirmed	nematode larval development /// embryonic development ending in birth or egg hatching /// growth	---	---	-1.96
173287_s_at	hex-1	HEXosaminidase /// locus:hex-1	carbohydrate metabolic process /// carbohydrate metabolic process /// metabolic process	catalytic activity /// beta-N-acetylhexosaminidase activity /// beta-N-acetylhexosaminidase activity /// hydrolase activity /// hydrolase activity, acting on glycosyl bonds /// cation binding	lysosome	-2.01
173296_at	dig-1	DIsplaced Gonad	phosphate metabolic process /// cell adhesion /// multicellular organismal development /// nervous system development /// gonad development /// hermaphrodite genitalia development	magnesium ion binding /// inorganic diphosphatase activity /// copper ion binding /// calcium ion binding /// protein binding /// electron carrier activity	extracellular region /// proteinaceous extracellular matrix /// cytoplasm	2.83
173297_at	Y48G8AL.13	status:Confirmed /// hypothetical protein	---	---	membrane /// integral to membrane	2.82
173302_at	rod-1	ROD (Drosophila RoughDeal) homolog /// locus:rod-1	embryonic development ending in birth or egg hatching	---	---	-1.8
173307_s_at	F53B7.5	hypothetical protein	---	---	---	2.02
173311_s_at	grl-20	GRound-Like (grd related) /// locus:grl-20	---	---	---	-7.06
173323_at	C35E7.1	hypothetical protein /// status:Partially_confirmed	---	protein binding	---	-2.51
173335_s_at	dod-3	Downstream Of DAF-16 (regulated by DAF-16) /// locus:dod-3	determination of adult life span	---	integral to membrane	-3.03
173341_at	haf-6	HAlF transporter (PGP related) /// locus:haf-6	transport	nucleotide binding /// ATP binding /// ATPase activity /// nucleoside-triphosphatase activity /// ATPase activity, coupled to transmembrane movement of substances	integral to membrane	-2.2
173346_at	npp-13	Nuclear Pore complex Protein	establishment of mitotic spindle orientation /// transport /// embryonic development ending in birth or egg hatching	---	nuclear pore /// integral to membrane	-1.83
173348_s_at	cpg-9	Chondroitin ProteoGlycan /// locus:cpg-9	---	---	---	-2.81
173362_s_at	M03C11.2	hypothetical protein /// CHL1 protein	nucleobase, nucleoside, nucleotide and nucleic acid metabolic process /// embryonic development ending in birth or egg hatching	nucleic acid binding /// DNA binding /// ATP-dependent DNA helicase activity /// ATP binding /// ATP-dependent helicase activity /// hydrolase activity, acting on acid anhydrides, in phosphorus-containing anhydrides	nucleus	-2.02
173373_s_at	Y48G10A.2	status:Partially_confirmed /// hypothetical protein	---	protein binding	---	-1.82
173387_at	mab-5	Male ABnormal /// locus:mab-5	negative regulation of transcription from RNA polymerase II promoter /// regulation of transcription, DNA-dependent /// multicellular organismal development /// anterior/posterior pattern formation /// anterior/posterior pattern formation /// regulation of cell migration /// regulation of cell fate specification /// tail tip morphogenesis /// tail tip morphogenesis /// regulation of transcription…	DNA binding /// transcription factor activity /// transcription regulator activity /// sequence-specific DNA binding	nucleus	2.91
173393_s_at	T26E3.4	hypothetical protein /// status:Confirmed	positive regulation of growth rate	---	---	1.92
173399_s_at	lin-17	abnormal cell LINeage	morphogenesis of an epithelium /// morphogenesis of an epithelium /// signal transduction /// cell surface receptor linked signal transduction /// G-protein coupled receptor protein signaling pathway /// multicellular organismal development /// gonad development /// regulation of asymmetric cell division /// regulation of asymmetric cell division /// polarity specification of anterior/posterior a…	signal transducer activity /// receptor activity /// transmembrane receptor activity /// non-G-protein coupled 7TM receptor activity /// G-protein coupled receptor activity	membrane /// integral to membrane	2.1
173404_s_at	R186.1	hypothetical protein /// status:Confirmed	embryonic development ending in birth or egg hatching	---	---	2.39
173411_s_at	vit-6	VITellogenin structural genes (yolk protein genes)	lipid transport	lipid transporter activity /// nutrient reservoir activity	extracellular region	-2.89
173416_at	ZK507.6	G2/M Cyclin A /// hypothetical protein	cell cycle /// mitosis /// embryonic development ending in birth or egg hatching /// hermaphrodite genitalia development /// cell division	---	nucleus	-1.92
173428_at	lin-59	abnormal cell LINeage	reproduction /// ectodermal cell fate specification /// nematode larval development /// transcription /// regulation of transcription, DNA-dependent /// embryonic development ending in birth or egg hatching /// chromatin modification /// oviposition /// positive regulation of growth rate /// locomotion /// regulation of multicellular organism growth /// tail tip morphogenesis /// positive regulat…	DNA binding /// protein binding /// methyltransferase activity /// zinc ion binding /// transferase activity /// histone-lysine N-methyltransferase activity /// metal ion binding	nucleus	2.2
173431_at	egl-3	EGg Laying defective	proteolysis	serine-type endopeptidase activity	---	2.31
173443_s_at	mei-2	defective MEIosis /// locus:mei-2	meiotic spindle organization /// cell cycle /// meiosis /// meiosis /// embryonic development /// embryonic development ending in birth or egg hatching /// positive regulation of growth rate /// cell division	protein binding	microtubule	-2
173456_at	aex-3	Aboc, EXpulsion defective	apoptosis /// synaptic transmission /// mating /// oviposition /// defecation	guanyl-nucleotide exchange factor activity	membrane /// integral to membrane	2.39
173466_s_at	flp-9	FMRF-Like Peptide /// locus:flp-9	neuropeptide signaling pathway /// locomotory behavior	---	extracellular region	2.02
173488_at	T05E7.5	hypothetical protein /// status:Partially_confirmed	---	---	---	-1.96
173489_at	sdz-14	SKN-1 Dependent Zygotic transcript /// locus:sdz-14	---	---	---	-2.04
173496_s_at	T23G7.3	hypothetical protein /// status:Confirmed	---	nucleic acid binding	intracellular	1.8
173501_s_at	M70.4	hypothetical protein /// status:Partially_confirmed	---	---	integral to membrane	-1.95
173507_s_at	mig-13	abnormal cell MIGration	positive regulation of cell migration	---	integral to membrane	-2.16
173510_s_at	mdt-6	MeDiaTor /// locus:mdt-6	transcription /// regulation of transcription, DNA-dependent /// multicellular organismal development /// gonad development /// embryonic development ending in birth or egg hatching /// regulation of transcription	protein binding /// transcription regulator activity	nucleus	-1.81
173526_at	F13H6.5	hypothetical protein /// status:Partially_confirmed	---	---	integral to membrane	1.81
173547_s_at	imp-1	IntraMembrane Protease (IMPAS) family	---	aspartic-type endopeptidase activity /// protein binding	integral to membrane	-2.02
173551_at	F32B5.7	hypothetical protein /// status:Partially_confirmed	---	electron carrier activity	---	2.32
173557_s_at	clec-157	C-type LECtin /// locus:clec-157	---	binding	---	-2.21
173568_at	C27A12.6	hypothetical protein /// status:Partially_confirmed	---	zinc ion binding	---	-2.95
173571_s_at	oac-50	O-ACyltransferase homolog /// locus:oac-50	---	---	integral to membrane	6.89
173572_s_at	T05H10.3	hypothetical protein /// status:Confirmed	---	protein binding	---	-2.83
173576_at	ZK180.5	hypothetical protein	---	---	---	2.04
173578_s_at	C33D9.3	hypothetical protein	---	---	---	2.08
173580_s_at	twk-42	TWiK family of potassium channels /// locus:twk-42	transport /// ion transport /// potassium ion transport	ion channel activity /// potassium channel activity	membrane /// integral to membrane	2.06
173588_s_at	T13F2.6	hypothetical protein /// status:Partially_confirmed	embryonic development ending in birth or egg hatching	---	---	-2.19
173609_at	Y39B6A.1	status:Confirmed /// hypothetical protein	---	protein binding	---	-6.12
173636_at	rpm-1	Regulator of Presynaptic Morphology /// locus:rpm-1	transcription /// regulation of transcription, DNA-dependent /// ubiquitin-dependent protein catabolic process /// body morphogenesis /// oviposition /// regulation of mitotic metaphase/anaphase transition /// regulation of protein stability /// locomotion /// negative regulation of MAPKKK cascade /// regulation of synapse organization /// regulation of synapse organization	protein binding /// zinc ion binding /// hydrolase activity /// ligase activity /// metal ion binding	intracellular /// nucleus /// anaphase-promoting complex	1.93
173638_s_at	ZK177.8	hypothetical protein	reproduction	catalytic activity	---	-1.84
173642_at	Y22D7AR.6	status:Partially_confirmed /// hypothetical protein	---	inositol trisphosphate 3-kinase activity	---	1.86
173649_at	peptidase	hypothetical protein	proteolysis	metalloendopeptidase activity /// peptidase activity /// metallopeptidase activity /// zinc ion binding /// hydrolase activity /// metal ion binding	membrane /// integral to membrane	2.04
173659_s_at	peroxidase	hypothetical protein /// peroxidase	response to oxidative stress /// hermaphrodite genitalia development	peroxidase activity /// heme binding	---	-2.24
173660_at	R90.1	hypothetical protein /// casein Kinase I	nematode larval development /// protein amino acid phosphorylation /// growth /// locomotion	protein kinase activity /// protein serine/threonine kinase activity /// protein tyrosine kinase activity /// ATP binding	---	2.14
173669_s_at	K10B3.6	hypothetical protein	carbohydrate metabolic process /// glycerol metabolic process /// lipid metabolic process	catalytic activity /// phosphoric diester hydrolase activity /// glycerophosphodiester phosphodiesterase activity /// carbohydrate binding	integral to membrane	5.69
173688_s_at	T22B7.7	hypothetical protein /// status:Confirmed	---	---	---	-10.84
173691_s_at	ZK688.2	status:Partially_confirmed /// hypothetical protein	locomotion /// positive regulation of multicellular organism growth	---	integral to membrane	3.4
173696_at	fbf-2	Fem-3 mRNA Binding Factor /// locus:fbf-2	reproduction /// morphogenesis of an epithelium /// multicellular organismal development /// sex determination /// embryonic development ending in birth or egg hatching /// negative regulation of translation /// cell differentiation /// locomotion /// feminization of hermaphroditic germ-line /// hermaphrodite genitalia development /// meiotic chromosome segregation /// germline cell cycle switchi…	RNA binding /// binding	cytoplasm	-2.01
173704_s_at	W07B8.4	hypothetical protein /// thiol protease	proteolysis	cysteine-type endopeptidase activity /// cysteine-type peptidase activity	---	-2.26
173708_s_at	dnj-2	hypothetical protein /// DNaJ domain (prokaryotic heat shock protein) /// locus:dnj-2 /// status:Predicted	---	heat shock protein binding	membrane /// integral to membrane	-1.92
173710_at	F58G11.3	hypothetical protein	---	---	---	-2.14
173718_s_at	B0457.2	hypothetical protein /// elastin precusor	---	---	---	2.75
173729_at	T22F3.11	hypothetical protein	transport	transporter activity	integral to membrane	1.81
173745_s_at	Y111B2A.3	status:Partially_confirmed /// hypothetical protein	embryonic development ending in birth or egg hatching	---	---	-2.22
173747_at	cdc-14	Cell Division Cycle related	protein amino acid dephosphorylation /// protein amino acid dephosphorylation /// cell cycle /// dephosphorylation /// positive regulation of growth rate /// cell division	nucleic acid binding /// phosphoprotein phosphatase activity /// protein tyrosine phosphatase activity /// protein tyrosine phosphatase activity /// protein tyrosine/serine/threonine phosphatase activity /// zinc ion binding /// hydrolase activity /// phosphatase activity /// metal ion binding	microtubule	2.16
173762_s_at	tag-341	Temporarily Assigned Gene name	nematode larval development /// signal transduction /// intracellular signaling cascade /// embryonic development ending in birth or egg hatching /// body morphogenesis	zinc ion binding /// metal ion binding	intracellular	2.07
173767_s_at	col-62	COLlagen /// COLlagen /// locus:col-7 /// locus:col-62	embryonic development ending in birth or egg hatching	structural constituent of cuticle	integral to membrane	-1.95
173767_s_at	col-7	COLlagen /// COLlagen /// locus:col-7 /// locus:col-62	embryonic development ending in birth or egg hatching	structural constituent of cuticle	integral to membrane	-1.95
173769_s_at	M176.8	---	---	---	---	2.32
173774_s_at	carboxypeptidase	hypothetical protein	proteolysis	carboxypeptidase activity /// metallocarboxypeptidase activity /// zinc ion binding	---	2.01
173775_at	rab-8	RAB family /// locus:rab-8	reproduction /// regulation of transcription, DNA-dependent /// intracellular protein transport /// nucleocytoplasmic transport /// signal transduction /// small GTPase mediated signal transduction /// protein secretion /// embryonic development ending in birth or egg hatching /// protein transport /// embryonic genitalia morphogenesis	nucleotide binding /// GTPase activity /// protein binding /// ATP binding /// GTP binding /// transcription factor binding	intracellular	1.95
173776_s_at	rab-8	RAB family /// locus:rab-8	reproduction /// regulation of transcription, DNA-dependent /// intracellular protein transport /// nucleocytoplasmic transport /// signal transduction /// small GTPase mediated signal transduction /// protein secretion /// embryonic development ending in birth or egg hatching /// protein transport /// embryonic genitalia morphogenesis	nucleotide binding /// GTPase activity /// protein binding /// ATP binding /// GTP binding /// transcription factor binding	intracellular	2.02
173783_at	Aminopeptidase	hypothetical protein /// Aminopeptidase	proteolysis /// embryonic development ending in birth or egg hatching /// pronuclear migration	metallopeptidase activity /// zinc ion binding	---	-4.75
173784_at	C50E3.11	hypothetical protein /// status:Partially_confirmed	transport	folic acid binding /// reduced folate carrier activity	membrane	-2.11
173787_at	Y47G7B.2	status:Partially_confirmed /// hypothetical protein	---	---	integral to membrane	-2.29
173798_at	T16A9.4	hypothetical protein /// endothelin converting enzyme 1	proteolysis	metalloendopeptidase activity /// peptidase activity /// metallopeptidase activity /// zinc ion binding /// hydrolase activity /// metal ion binding	membrane /// integral to membrane	1.83
173804_s_at	gyg-2	hypothetical protein /// locus:gyg-2	---	transferase activity, transferring glycosyl groups	---	-1.95
173812_at	ast-1	Axon STeering defect /// locus:ast-1	nematode larval development /// regulation of transcription, DNA-dependent /// embryonic development ending in birth or egg hatching /// oviposition /// growth	DNA binding /// transcription factor activity /// sequence-specific DNA binding	nucleus	2.47
173815_s_at	tnt-3	TropoNin T	defense response	---	---	2.82
173818_at	scd-1	Suppressor of Constitutive Dauer formation	positive regulation of growth rate	---	---	1.81
173825_at	T21B6.3	hypothetical protein /// f-spondin like protein	---	protein binding	---	1.84
173827_at	unc-68	UNCoordinated /// locus:unc-68	ion transport /// calcium ion transport /// cellular calcium ion homeostasis /// coenzyme A metabolic process /// locomotion /// positive regulation of non-apoptotic programmed cell death	hydroxymethylglutaryl-CoA reductase (NADPH) activity /// ion channel activity /// ryanodine-sensitive calcium-release channel activity /// calcium channel activity /// calcium ion binding /// coenzyme binding	membrane /// integral to membrane	1.82
173840_s_at	clec-13	C-type LECtin /// C-type LECtin /// locus:clec-13 /// locus:clec-15	positive regulation of growth rate	binding	integral to membrane	-3.46
173840_s_at	clec-15	C-type LECtin /// C-type LECtin /// locus:clec-13 /// locus:clec-15	positive regulation of growth rate	binding	integral to membrane	-3.46
173844_s_at	Y22D7AL.9	status:Partially_confirmed /// hypothetical protein	---	binding	---	-2.56
173853_at	dop-1	DOPamine receptor	G-protein coupled receptor protein signaling pathway /// dopamine receptor signaling pathway /// mechanosensory behavior /// response to food /// locomotion /// regulation of locomotion /// habituation	receptor activity	integral to membrane	2.25
173861_at	mre-11	yeast MRE recombination/repair homolog /// locus:mre-11	DNA metabolic process /// DNA repair /// double-strand break repair /// response to DNA damage stimulus /// meiosis /// embryonic development ending in birth or egg hatching /// positive regulation of growth rate /// meiotic chromosome segregation /// germline cell cycle switching, mitotic to meiotic cell cycle	nuclease activity /// endonuclease activity /// exonuclease activity /// hydrolase activity /// manganese ion binding	nucleus	-1.94
173877_s_at	bath-38	BTB and MATH domain containing /// locus:bath-38	---	protein binding	---	2.2
173879_at	F52B5.2	hypothetical protein /// serine/threonine kinase (2 domains)	protein amino acid phosphorylation	protein kinase activity /// protein serine/threonine kinase activity /// protein tyrosine kinase activity /// ATP binding	---	-2.88
173890_at	unc-41	UNCoordinated /// locus:unc-41	intracellular protein transport /// endocytosis /// embryonic development ending in birth or egg hatching /// vesicle-mediated transport /// locomotion /// positive regulation of locomotion	protein binding	cytoplasm /// clathrin adaptor complex	1.96
173900_s_at	B0331.2	hypothetical protein /// phosphate permease like	phosphate transport	inorganic phosphate transmembrane transporter activity	membrane /// integral to membrane	2.68
173905_s_at	ugt-46	UDP-GlucuronosylTransferase /// locus:ugt-46	metabolic process	protein binding /// glucuronosyltransferase activity /// transferase activity /// transferase activity, transferring glycosyl groups /// transferase activity, transferring hexosyl groups	membrane /// integral to membrane	4.44
173914_s_at	F21D5.2	hypothetical protein /// Yeast YHB3-like protein	---	---	---	-1.85
173924_at	shn-1	SHaNk (SH3/ankyrin domain scaffold protein) related	rhythmic behavior /// defecation /// positive regulation of growth rate	protein binding	---	2.26
173925_s_at	C16C10.8	hypothetical protein /// cell growth regulating protein	---	zinc ion binding /// metal ion binding	nucleus	2.86
173937_at	F30F8.1	hypothetical protein /// status:Partially_confirmed	---	---	---	-1.83
173951_s_at	Y106G6H.5	status:Partially_confirmed /// hypothetical protein	glycine catabolic process /// metabolic process	catalytic activity /// aminomethyltransferase activity /// binding /// oxidoreductase activity	cytoplasm	1.91
173954_at	plc-1	PhosphoLipase C	reproduction /// lipid metabolic process /// signal transduction /// intracellular signaling cascade /// small GTPase mediated signal transduction /// positive regulation of growth rate	phosphoinositide phospholipase C activity /// phospholipase C activity /// signal transducer activity /// guanyl-nucleotide exchange factor activity /// calcium ion binding /// phosphoric diester hydrolase activity /// hydrolase activity	intracellular	2.24
173968_s_at	brc-1	BRCa homolog (tumor suppressor gene Brca1)	double-strand break repair via homologous recombination /// DNA repair /// DNA repair /// apoptosis /// response to DNA damage stimulus /// cell death /// positive regulation of growth rate /// meiotic chromosome segregation /// meiotic chromosome separation	DNA binding /// protein binding /// zinc ion binding	intracellular /// nucleus	-2.21
173993_s_at	F47H4.1	hypothetical protein /// Zinc finger, C2H2 type (2 domains)	---	zinc ion binding	intracellular	-1.9
174015_at	W02B12.9	hypothetical protein /// mitochondrial RNA splicing MSR4 like protein	transport /// ion transport /// iron ion transport /// embryonic development ending in birth or egg hatching /// positive regulation of growth rate	binding /// iron ion binding	mitochondrion /// mitochondrial inner membrane /// membrane /// integral to membrane	2.29
174033_at	unc-44	UNCoordinated family member (unc-44) (unc-44)	carbohydrate metabolic process /// signal transduction /// body morphogenesis /// positive regulation of growth rate /// locomotion /// positive regulation of locomotion /// positive regulation of multicellular organism growth	hydrolase activity, hydrolyzing O-glycosyl compounds /// protein binding /// protein binding	---	2.19
174068_s_at	rab-8	RAB family /// locus:rab-8	reproduction /// regulation of transcription, DNA-dependent /// intracellular protein transport /// nucleocytoplasmic transport /// signal transduction /// small GTPase mediated signal transduction /// protein secretion /// embryonic development ending in birth or egg hatching /// protein transport /// embryonic genitalia morphogenesis	nucleotide binding /// GTPase activity /// protein binding /// ATP binding /// GTP binding /// transcription factor binding	intracellular	2.49
174077_at	C05D9.9	hypothetical protein	---	---	---	4.26
174088_at	C14F11.7	hypothetical protein /// status:Confirmed	---	---	---	-1.89
174092_at	C16D9.9	hypothetical protein /// status:Confirmed	---	---	integral to membrane	8.39
174099_s_at	Y39G10AR.20	status:Confirmed /// hypothetical protein	tubulin complex assembly	unfolded protein binding	microtubule	-1.82
174112_at	cogc-2	Conserved Oligomeric Golgi (COG) Component family member (cogc-2) (cogc-2)	nematode larval development /// transport /// Golgi organization /// embryonic development ending in birth or egg hatching /// protein transport /// regulation of cell migration /// gonad morphogenesis /// growth /// positive regulation of growth rate /// hermaphrodite genitalia development /// oogenesis	protein binding	Golgi membrane /// Golgi apparatus /// membrane	-1.83
174116_at	Y71F9AL.1	status:Partially_confirmed /// hypothetical protein	methylation	nucleic acid binding /// methyltransferase activity	---	-2.57
174119_at	---	---	---	---	---	2.49
174121_at	---	---	---	---	---	-1.93
174123_s_at	C25G4.11	hypothetical protein /// status:Partially_confirmed	---	---	---	2.19
174137_s_at	cst-1	Caenorhabditis STE20-like kinase /// Caenorhabditis STE20-like kinase /// locus:cst-2	protein amino acid phosphorylation /// signal transduction /// locomotion /// positive regulation of locomotion	nucleotide binding /// protein kinase activity /// protein serine/threonine kinase activity /// protein tyrosine kinase activity /// protein binding /// ATP binding /// kinase activity /// transferase activity	---	1.85
174137_s_at	cst-2	Caenorhabditis STE20-like kinase /// Caenorhabditis STE20-like kinase /// locus:cst-2	protein amino acid phosphorylation /// signal transduction /// locomotion /// positive regulation of locomotion	nucleotide binding /// protein kinase activity /// protein serine/threonine kinase activity /// protein tyrosine kinase activity /// protein binding /// ATP binding /// kinase activity /// transferase activity	---	1.85
174156_s_at	Y111B2A.12	status:Confirmed /// hypothetical protein	reproduction /// nematode larval development /// glucose metabolic process /// embryonic development ending in birth or egg hatching /// growth /// positive regulation of multicellular organism growth	glyceraldehyde-3-phosphate dehydrogenase (phosphorylating) activity /// NAD binding	---	1.83
174162_s_at	hcp-6	HoloCentric chromosome binding Protein	mitotic sister chromatid segregation /// nematode larval development /// mitotic chromosome condensation /// embryonic development ending in birth or egg hatching /// growth /// hermaphrodite genitalia development /// attachment of spindle microtubules to kinetochore during mitosis	binding	---	-2.05
174167_at	F53C3.6	hypothetical protein	---	---	integral to membrane	3.07
174169_at	gcy-12	Guanylyl CYclase /// locus:gcy-12	protein amino acid phosphorylation /// intracellular signaling cascade /// cyclic nucleotide biosynthetic process	guanylate cyclase activity /// protein kinase activity /// protein serine/threonine kinase activity /// protein tyrosine kinase activity /// ATP binding /// phosphorus-oxygen lyase activity	membrane /// integral to membrane	1.83
174179_s_at	ekl-4	Enhancer of Ksr-1 Lethality	reproduction /// gastrulation with mouth forming first /// embryonic development /// embryonic development ending in birth or egg hatching /// negative regulation of transcription /// positive regulation of growth rate /// locomotion /// hermaphrodite genitalia development	DNA binding	nucleus	-1.89
174180_at	T02E9.5	hypothetical protein /// status:Confirmed	---	---	---	1.81
174183_at	F08D12.7	hypothetical protein /// status:Partially_confirmed	---	---	---	5.39
174184_at	Y54G2A.10	hypothetical protein	---	---	---	3.83
174189_at	alg-1	Argonaute (plant)-Like Gene	nematode larval development /// nematode larval development /// determination of adult life span /// embryonic development /// molting cycle, collagen and cuticulin-based cuticle /// positive regulation of growth rate /// locomotion /// positive regulation of locomotion /// positive regulation of multicellular organism growth /// vulval development /// hermaphrodite genitalia development	nucleic acid binding	---	1.94
174192_at	---	---	---	---	---	-1.83
174197_s_at	F23D12.2	hypothetical protein /// status:Partially_confirmed	---	---	---	-1.85
174215_s_at	B0507.8	hypothetical protein /// status:Partially_confirmed	---	---	---	-4.04
174220_at	F35D11.3	hypothetical protein /// status:Partially_confirmed	---	---	membrane /// integral to membrane	2.07
174221_at	tag-260	Temporarily Assigned Gene name	---	protein binding	---	2.19
174223_s_at	T05A7.6	hypothetical protein /// casein kinase	protein amino acid phosphorylation	protein kinase activity /// protein serine/threonine kinase activity /// ATP binding	---	1.99
174228_at	K08C7.4	hypothetical protein /// status:Partially_confirmed	---	---	---	-3.28
174248_at	vab-15	Variable ABnormal morphology /// locus:vab-15	reproduction /// transcription /// regulation of transcription, DNA-dependent /// multicellular organismal development /// parturition /// locomotory behavior /// locomotion /// regulation of transcription /// embryonic morphogenesis	DNA binding /// transcription factor activity /// transcription factor activity /// transcription regulator activity /// sequence-specific DNA binding /// sequence-specific DNA binding	nucleus /// nucleus	4.9
174249_at	---	---	---	---	---	-2.04
174260_at	srsx-34	Serpentine Receptor, class SX	---	receptor activity	integral to membrane	-2.25
174274_at	ced-3	CEll Death abnormality /// locus:ced-3	reproduction /// proteolysis /// apoptosis /// cell death /// apoptotic program /// programmed cell death /// regulation of apoptosis	cysteine-type endopeptidase activity /// protein binding /// protein binding /// peptidase activity /// cysteine-type peptidase activity /// hydrolase activity	intracellular	-2.14
174275_at	dmd-7	DM (Doublesex/MAB-3) Domain family	regulation of transcription, DNA-dependent /// sex differentiation	DNA binding /// transcription factor activity	nucleus	1.81
174281_at	Y77E11A.14	status:Confirmed /// hypothetical protein	---	---	---	3.03
174282_at	sys-1	SYmmetrical Sister cell hermaphrodite gonad defect	reproduction /// gastrulation with mouth forming first /// morphogenesis of an epithelium /// nematode larval development /// male gonad development /// female gonad development /// regulation of asymmetric cell division /// embryonic development /// embryonic development ending in birth or egg hatching /// proximal/distal pattern formation /// polarity specification of proximal/distal axis /// p…	binding	---	-2.43
174286_at	alg-1	Argonaute (plant)-Like Gene	nematode larval development /// nematode larval development /// determination of adult life span /// embryonic development /// molting cycle, collagen and cuticulin-based cuticle /// positive regulation of growth rate /// locomotion /// positive regulation of locomotion /// positive regulation of multicellular organism growth /// vulval development /// hermaphrodite genitalia development	nucleic acid binding	---	2.98
174288_at	F40A3.5	hypothetical protein /// protein kinase	protein amino acid phosphorylation	protein kinase activity /// protein serine/threonine kinase activity /// protein tyrosine kinase activity /// ATP binding	integral to membrane	1.98
174296_at	F10C5.2	hypothetical protein /// status:Confirmed	---	protein binding	integral to membrane	-2.14
174306_at	alr-1	AristaLess (Drosophila homeodomain) Related /// locus:alr-1	regulation of transcription, DNA-dependent /// regulation of transcription	DNA binding /// transcription factor activity /// transcription regulator activity /// sequence-specific DNA binding	nucleus	2.52
174322_s_at	F33E11.2	hypothetical protein /// status:Partially_confirmed	embryonic development ending in birth or egg hatching	---	---	-2.48
174331_at	rgs-6	Regulator of G protein Signaling /// locus:rgs-6	negative regulation of signal transduction	signal transducer activity	---	2.75
174337_at	nac-3	NADC (Na+-coupled dicarboxylate transporter) family	transport /// ion transport /// sodium ion transport /// determination of adult life span	transporter activity /// symporter activity /// sodium ion binding	membrane /// integral to membrane	1.98
174339_at	---	---	---	---	---	1.99
174340_at	Y18H1A.8	status:Partially_confirmed /// hypothetical protein	cell wall modification	pectinesterase activity	cell wall	-2.02
174349_at	EEED8.15	hypothetical protein /// status:Partially_confirmed	---	---	---	-2.52
174351_at	grl-25	GRound-Like (grd related) /// locus:grl-25	---	---	integral to membrane	-5.55
174355_at	clec-219	C-type LECtin /// locus:clec-219	embryonic development ending in birth or egg hatching	sugar binding	---	-9.47
174361_at	F43G6.4	hypothetical protein /// transcriptional regulatory protein (RPD3)	---	---	---	1.82
174362_at	---	---	---	---	---	2.04
174364_at	scpl-3	SCP(Small C-terminal domain Phosphatase)-Like phosphatase	---	phosphoprotein phosphatase activity /// hydrolase activity /// phosphatase activity	---	1.93
174391_at	R13H7.2	hypothetical protein	G-protein coupled receptor protein signaling pathway	---	integral to membrane	1.94
174394_at	---	---	---	---	---	-1.81
174396_at	unc-82	UNCoordinated	protein amino acid phosphorylation	protein kinase activity /// protein serine/threonine kinase activity /// protein tyrosine kinase activity /// ATP binding	---	2.42
174399_at	Y102A11A.3	status:Partially_confirmed /// hypothetical protein	reproduction	protein binding	---	2.02
174401_at	ags-3	Activator of G protein Signalling	signal transduction	GTPase activator activity /// binding /// protein binding	---	1.85
174413_at	---	---	---	---	---	2.01
174418_at	T19F4.1	hypothetical protein	G-protein coupled receptor protein signaling pathway	---	integral to membrane	2.89
174420_at	F29C6.1	hypothetical protein	reproduction	---	---	2.07
174426_at	F13H6.1	hypothetical protein	gastrulation with mouth forming first /// embryonic development /// positive regulation of growth rate /// locomotion	nucleic acid binding /// zinc ion binding	intracellular	2.22
174428_s_at	F45G2.3	hypothetical protein /// XPG N-terminal domain, XPG I-region	DNA repair	DNA binding /// catalytic activity /// nuclease activity	nucleus	-2.03
174442_s_at	unc-30	UNCoordinated	regulation of transcription, DNA-dependent /// multicellular organismal development /// locomotion /// regulation of transcription /// positive regulation of transcription from RNA polymerase II promoter	DNA binding /// transcription factor activity /// transcription regulator activity /// sequence-specific DNA binding	nucleus	1.83
174445_at	Y48G1C.5	status:Partially_confirmed /// hypothetical protein	translation /// protein amino acid dephosphorylation /// dephosphorylation	structural constituent of ribosome /// protein tyrosine phosphatase activity /// phosphatase activity	intracellular /// ribosome /// integral to membrane	2.03
174446_s_at	dur-1	Dauer Up-Regulated	---	---	---	2.31
174459_at	grl-25	GRound-Like (grd related) /// locus:grl-25	---	---	integral to membrane	-2.71
174466_at	icp-1	InCenP homolog /// locus:icp-1	reproduction /// cytokinesis /// embryonic development ending in birth or egg hatching	protein binding	---	-2
174475_s_at	F45F2.10	hypothetical protein /// status:Partially_confirmed	reproduction /// embryonic development ending in birth or egg hatching	---	---	-2.05
174479_at	mdt-17	MeDiaTor /// locus:mdt-17	reproduction /// transcription /// regulation of transcription, DNA-dependent /// multicellular organismal development /// embryonic development ending in birth or egg hatching /// body morphogenesis /// oviposition /// positive regulation of growth rate /// locomotion /// hermaphrodite genitalia development	---	nucleus	-2.11
174481_at	C45G9.6	hypothetical protein	---	---	---	2.56
174487_s_at	C41G7.3	hypothetical protein /// status:Partially_confirmed	meiotic chromosome segregation	RNA binding	---	-2.6
174492_at	unc-89	UNCoordinated	carbohydrate metabolic process /// protein amino acid phosphorylation /// regulation of Rho protein signal transduction /// locomotion	protein kinase activity /// protein serine/threonine kinase activity /// protein tyrosine kinase activity /// vascular endothelial growth factor receptor activity /// Rho guanyl-nucleotide exchange factor activity /// ATP binding /// kinase activity /// transferase activity	intracellular	2.33
174498_at	let-19	LEThal /// locus:let-19	transcription /// regulation of transcription, DNA-dependent /// multicellular organismal development /// embryonic development ending in birth or egg hatching	---	nucleus	1.87
174510_at	---	---	---	---	---	2.82
174514_at	F26F12.3	hypothetical protein	---	---	---	1.9
174522_at	F56D6.13	hypothetical protein /// status:Confirmed	---	---	integral to membrane	3
174528_s_at	fbxb-8	F-box B protein /// locus:fbxb-8	---	---	---	-1.81
174529_at	H28G03.1	hypothetical protein	---	nucleotide binding /// nucleic acid binding	---	1.86
174533_at	T09E8.1	Hypothetical protein (T09E8.1)	reproduction	---	---	6.85
174536_s_at	clec-136	C-type LECtin /// locus:clec-136	---	---	---	-6.92
174540_s_at	F47B3.2	hypothetical protein /// hypothetical protein /// status:Partially_confirmed /// status:Partially_confirmed	protein amino acid dephosphorylation /// dephosphorylation	protein tyrosine phosphatase activity /// phosphatase activity	---	2.9
174540_s_at	F47B3.7	hypothetical protein /// hypothetical protein /// status:Partially_confirmed /// status:Partially_confirmed	protein amino acid dephosphorylation /// dephosphorylation	protein tyrosine phosphatase activity /// phosphatase activity	---	2.9
174563_at	---	---	---	---	---	2.72
174568_s_at	fbxc-50	F-box C protein /// locus:fbxc-50	positive regulation of multicellular organism growth	---	---	-1.9
174584_s_at	miz-1	MIZ-type zinc finger transcription factor /// locus:miz-1	nematode larval development	zinc ion binding	---	2.13
174589_at	sax-7	Sensory AXon guidance	embryonic development	---	integral to membrane	-2.18
174595_at	ain-1	ALG-1 INteracting protein /// locus:ain-1	oviposition /// regulation of protein localization /// locomotion	---	---	1.94
174597_at	ldb-1	LIM domain Binding Protein	multicellular organismal development /// mechanosensory behavior /// embryonic development ending in birth or egg hatching /// positive regulation of growth rate /// locomotion /// vulval development /// hermaphrodite genitalia development	transcription cofactor activity	nucleus	1.95
174604_at	C16C10.3	hypothetical protein /// status:Partially_confirmed	nematode larval development /// growth	nucleic acid binding	---	-2.05
174610_at	tsp-14	TetraSPanin family	---	---	membrane /// integral to membrane	2.77
174620_at	tag-241	Temporarily Assigned Gene name /// locus:tag-241	---	protein binding	---	1.91
174623_at	ztf-19	locus:ztf-19 /// Zinc finger Transcription Factor family	nematode larval development /// embryonic development ending in birth or egg hatching /// body morphogenesis /// growth /// locomotion	nucleic acid binding /// zinc ion binding	intracellular	2.73
174626_at	kcc-1	K+/Cl- Cotransporter /// locus:kcc-1	transport /// embryonic development ending in birth or egg hatching	---	membrane /// integral to membrane	1.86
174633_at	ketn-1	KETtiN (Drosophila actin-binding) homolog	positive regulation of growth rate	---	---	2.13
174636_at	---	---	---	---	---	3.27
174639_at	sad-1	Synapses of Amphids Defective	protein amino acid phosphorylation /// axon guidance /// synaptogenesis /// regulation of axon extension /// locomotion /// synaptic vesicle transport	protein kinase activity /// protein serine/threonine kinase activity /// protein tyrosine kinase activity /// ATP binding /// kinase activity	---	2.19
174641_at	F08B12.1	hypothetical protein /// status:Partially_confirmed	---	---	integral to membrane	1.81
174651_s_at	knl-2	Kinetochore NuLl /// locus:knl-2	reproduction /// cytokinesis /// nucleus organization /// embryonic development ending in birth or egg hatching /// cell division	---	---	-2.16
174665_at	syd-1	SYnapse Defective	signal transduction /// multicellular organismal development /// nervous system development /// cell projection organization /// cell differentiation /// activation of Rho GTPase activity /// locomotion	GTPase activator activity /// Rho GTPase activator activity /// protein binding	intracellular /// cell junction /// synapse /// synapse	2.06
174675_at	acs-2	fatty Acid CoA Synthetase family /// locus:acs-2	metabolic process	catalytic activity	---	2.48
174679_at	R04E5.9	hypothetical protein /// status:Confirmed	---	---	---	1.83
174695_s_at	F33G12.5	hypothetical protein /// status:Confirmed	---	protein binding	---	-1.84
174696_s_at	clec-208	C-type LECtin /// locus:clec-208	reproduction	binding	---	-6.06
174716_at	B0222.10	hypothetical protein /// status:Partially_confirmed	translation	structural constituent of ribosome	intracellular /// ribosome /// integral to membrane	-2.71
174720_at	ist-1	Insulin receptor SubsTrate homolog /// locus:ist-1	positive regulation of growth rate	receptor activity	---	2.54
174741_at	frm-3	FERM domain (protein4.1-ezrin-radixin-moesin) family /// locus:frm-3	---	binding /// cytoskeletal protein binding	cytoplasm /// cytoskeleton /// extrinsic to membrane	2.36
174748_at	T06D8.1	hypothetical protein	---	---	---	3.17
174749_s_at	Y46E12BL.3	status:Confirmed /// hypothetical protein	intracellular signaling cascade	---	---	-1.87
174755_s_at	Y6D1A.1	status:Partially_confirmed /// hypothetical protein	---	---	---	-1.84
174785_at	unc-52	UNCoordinated	nematode larval development /// cell adhesion /// epidermal growth factor receptor signaling pathway /// muscle development /// determination of adult life span /// embryonic development ending in birth or egg hatching /// embryonic development ending in birth or egg hatching /// cell migration /// molting cycle, collagen and cuticulin-based cuticle /// myofibril assembly /// positive regulation …	calcium ion binding	extracellular region /// proteinaceous extracellular matrix /// proteinaceous extracellular matrix /// basement membrane /// extracellular matrix	2.17
174800_s_at	C37E2.1	hypothetical protein /// isocitrate dehydrogenase	tricarboxylic acid cycle /// metabolic process /// oxidation reduction	magnesium ion binding /// isocitrate dehydrogenase (NAD+) activity /// protein binding /// oxidoreductase activity /// oxidoreductase activity, acting on the CH-OH group of donors, NAD or NADP as acceptor /// manganese ion binding /// metal ion binding	mitochondrion	2.54
174812_at	---	---	reproduction /// one-carbon compound metabolic process /// positive regulation of growth rate /// locomotion /// negative regulation of multicellular organism growth /// positive regulation of multicellular organism growth	nucleotide binding /// magnesium ion binding /// methionine adenosyltransferase activity /// ATP binding /// transferase activity /// potassium ion binding /// metal ion binding /// cobalt ion binding	---	2.54
174818_at	tag-192	Temporarily Assigned Gene name /// locus:tag-192	chromatin assembly or disassembly	nucleic acid binding /// DNA binding /// chromatin binding /// helicase activity /// ATP binding	chromatin /// nucleus	1.81
174819_at	unc-2	UNCoordinated	regulation of neurotransmitter levels /// DNA methylation /// transport /// ion transport /// calcium ion transport /// locomotory behavior /// response to heat /// negative regulation of transforming growth factor beta receptor signaling pathway /// locomotion /// response to starvation	DNA binding /// ion channel activity /// voltage-gated calcium channel activity /// calcium ion binding /// N-methyltransferase activity	voltage-gated calcium channel complex /// membrane /// integral to membrane	3.27
174826_at	casy-1	CAlSYntenin/Alcadein homolog	homophilic cell adhesion /// associative learning /// olfactory learning /// embryonic development ending in birth or egg hatching	calcium ion binding /// protein binding	membrane /// integral to membrane	2.12
174830_at	pqn-62	Prion-like-(Q/N-rich)-domain-bearing protein /// locus:pqn-62	---	nucleic acid binding	---	3.04
174839_at	fkh-7	ForKHead transcription factor family	regulation of transcription, DNA-dependent	DNA binding /// transcription factor activity /// zinc ion binding /// sequence-specific DNA binding	intracellular /// nucleus	1.87
174860_at	somi-1	Suppressor of Overexpressed MIcro-RNA	---	zinc ion binding	intracellular	2.18
174862_at	hlh-30	Helix Loop Helix	regulation of transcription	transcription regulator activity	nucleus	1.83
174865_at	F54G2.1	hypothetical protein	---	---	---	2.06
174869_at	tbx-2	T BoX family /// locus:tbx-2	nematode larval development /// regulation of transcription, DNA-dependent /// multicellular organismal development /// muscle development /// regulation of protein localization /// growth /// positive regulation of growth rate /// locomotion /// olfactory behavior /// muscle cell fate specification /// regulation of transcription	DNA binding /// transcription factor activity	nucleus	1.88
174877_at	such-1	SUppressor of spindle CHeckpoint defect /// locus:such-1	embryonic development ending in birth or egg hatching	---	---	-2.34
174878_at	T19D2.1	hypothetical protein /// status:Partially_confirmed	proteolysis	metalloendopeptidase activity	---	1.88
174886_at	ham-2	HSN Abnormal Migration	cell fate determination /// cell migration /// regulation of neuron differentiation	zinc ion binding	intracellular	1.97
174892_at	lin-66	abnormal cell LINeage /// locus:lin-66	nematode larval development /// locomotion /// positive regulation of locomotion /// hermaphrodite genitalia development	protein binding	---	2.02
174913_s_at	C34D4.14	hypothetical protein /// status:Partially_confirmed	protein modification process /// ubiquitin-dependent protein catabolic process /// protein ubiquitination	ubiquitin-protein ligase activity /// binding /// acid-amino acid ligase activity /// metal ion binding	intracellular	1.86
174919_at	ttx-1	abnormal ThermoTaXis	regulation of transcription, DNA-dependent /// thermosensory behavior /// regulation of transcription	DNA binding /// transcription factor activity /// protein binding /// transcription regulator activity /// sequence-specific DNA binding	nucleus	1.95
174920_at	Y57G11C.37	status:Partially_confirmed /// hypothetical protein	---	---	integral to membrane	1.89
174922_at	Y105C5A.15	status:Partially_confirmed /// hypothetical protein	---	DNA binding	---	1.88
174937_at	---	---	---	---	---	-1.93
174947_s_at	dct-9	DAF-16/FOXO Controlled, germline Tumor affecting /// locus:dct-9	embryonic development ending in birth or egg hatching	structural molecule activity	---	2.54
174958_at	---	---	---	---	---	2.37
174989_at	puf-9	PUF (Pumilio/FBF) domain-containing /// locus:puf-9	positive regulation of growth rate /// locomotion /// positive regulation of locomotion	RNA binding /// binding	---	1.9
174995_s_at	ptr-6	PaTched Related family /// locus:ptr-6	embryonic development ending in birth or egg hatching /// molting cycle, collagen and cuticulin-based cuticle /// locomotion /// positive regulation of multicellular organism growth	hedgehog receptor activity	membrane /// integral to membrane	3.16
175006_at	eff-1	Epithelial Fusion Failure	syncytium formation by plasma membrane fusion /// syncytium formation by plasma membrane fusion /// morphogenesis of an epithelium /// phospholipid metabolic process /// multicellular organismal development /// embryonic development ending in birth or egg hatching /// body morphogenesis /// embryonic body morphogenesis /// lipid catabolic process /// oviposition /// tail morphogenesis /// locomot…	phospholipase A2 activity	integral to membrane	2.18
175014_at	---	---	---	---	---	-2.25
175018_at	C36C9.1	hypothetical protein /// status:Partially_confirmed	---	protein binding	---	-2.25
175024_s_at	clec-161	C-type LECtin /// locus:clec-161	---	binding /// sugar binding	extracellular region	-4.85
175027_at	F14D12.1	hypothetical protein	---	---	---	2.29
175049_s_at	deg-3	DEGeneration of certain neurons /// locus:deg-3	transport /// ion transport /// regulation of non-apoptotic programmed cell death	ion channel activity /// extracellular ligand-gated ion channel activity /// neurotransmitter receptor activity	plasma membrane /// membrane /// integral to membrane /// cell junction /// synapse /// postsynaptic membrane	1.8
175053_at	ajm-1	Apical Junction Molecule	embryonic development /// embryonic development ending in birth or egg hatching /// positive regulation of growth rate /// locomotion /// cell-cell junction organization	cytoskeletal protein binding /// zinc ion binding	integral to membrane	1.89
175059_at	C35B1.7	hypothetical protein /// status:Confirmed	---	---	integral to membrane	1.92
175061_s_at	T08B6.5	hypothetical protein /// RNA binding protein	---	nucleotide binding /// nucleic acid binding	---	-1.85
175074_s_at	F18A1.7	hypothetical protein /// status:Confirmed	embryonic development ending in birth or egg hatching	---	---	-2.46
175077_s_at	C05D12.3	hypothetical protein	---	---	---	-2.59
175089_at	Y71H2AM.1	status:Confirmed /// hypothetical protein	proteolysis	endopeptidase activity /// metalloendopeptidase activity /// zinc ion binding	---	2.1
175103_s_at	C34B7.1	hypothetical protein /// status:Partially_confirmed	---	---	---	-2.42
175113_at	Y113G7A.15	status:Confirmed /// hypothetical protein	---	---	---	4.18
175114_s_at	F08F3.4	hypothetical protein /// status:Confirmed	metabolic process /// cellular metabolic process	catalytic activity /// binding /// coenzyme binding	---	2.77
175126_s_at	K08D8.5	hypothetical protein /// status:Confirmed	---	---	---	-3.37
175140_at	M03A8.3	hypothetical protein /// status:Partially_confirmed	---	---	---	1.83
175141_at	C35E7.11	hypothetical protein /// status:Confirmed	---	---	---	2.07
175156_at	---	---	---	---	---	2.07
175158_s_at	T12A7.6	hypothetical protein /// status:Partially_confirmed	---	---	---	2.45
175162_s_at	C08F1.10	hypothetical protein /// status:Confirmed	---	---	integral to membrane	-2.27
175166_at	flp-8	FMRF-Like Peptide	neuropeptide signaling pathway	---	---	1.94
175167_at	C40A11.6	hypothetical protein /// status:Partially_confirmed	potassium ion transport	voltage-gated potassium channel activity /// protein binding	voltage-gated potassium channel complex /// membrane	-2.25
175169_at	gld-3	defective in Germ Line Development	reproduction /// nuclear division /// cytokinesis /// nematode larval development /// spermatogenesis /// embryonic development ending in birth or egg hatching /// germ-line sex determination /// positive regulation of multicellular organism growth /// regulation of meiosis /// feminization of hermaphroditic germ-line /// vulval development /// masculinization of hermaphroditic germ-line /// germ…	protein binding	---	-2.5
175171_at	Y69A2AR.31	status:Partially_confirmed /// hypothetical protein	---	---	integral to membrane	1.86
175181_at	unc-44	UNCoordinated family member (unc-44) (unc-44)	carbohydrate metabolic process /// signal transduction /// body morphogenesis /// positive regulation of growth rate /// locomotion /// positive regulation of locomotion /// positive regulation of multicellular organism growth	hydrolase activity, hydrolyzing O-glycosyl compounds /// protein binding	---	1.95
175192_at	C35A11.1	hypothetical protein /// status:Partially_confirmed	G-protein coupled receptor protein signaling pathway	---	integral to membrane	2.12
175195_at	---	---	---	---	---	2.19
175210_at	C43G2.1	hypothetical protein /// status:Partially_confirmed	regulation of transcription, DNA-dependent /// lipid metabolic process /// fatty acid metabolic process /// signal transduction /// hormone-mediated signaling /// fatty acid oxidation	receptor activity /// hormone binding	membrane /// integral to membrane	1.85
175211_at	pdfr-1	PDF Receptor homolog	signal transduction /// cell surface receptor linked signal transduction /// G-protein coupled receptor protein signaling pathway /// locomotion	signal transducer activity /// receptor activity /// transmembrane receptor activity /// G-protein coupled receptor activity	plasma membrane /// membrane /// integral to membrane	2.16
175221_at	dyc-1	DYstrophin-like phenotype and CAPON related	positive regulation of locomotion /// regulation of oviposition /// muscle maintenance	protein binding /// protein binding /// nitric-oxide synthase regulator activity	dystrophin-associated glycoprotein complex	2.26
175222_at	K09F5.6	hypothetical protein /// status:Partially_confirmed	---	---	integral to membrane	1.93
175223_at	T20G5.4	hypothetical protein /// Putative membrane protein	---	---	integral to membrane	1.86
175224_at	Y67D8B.4	status:Confirmed /// hypothetical protein	---	---	---	2.92
175225_at	Y54F10AM.8	status:Confirmed /// hypothetical protein	lipid catabolic process	hydrolase activity	extracellular region	1.81
175228_at	nhl-3	NHL (ring finger b-box coiled coil) domain containing	---	protein binding /// zinc ion binding /// metal ion binding	intracellular	1.99
175231_s_at	C17E7.9	hypothetical protein	---	---	integral to membrane	-2.06
175235_at	clec-57	C-type LECtin /// locus:clec-57	---	binding	---	-1.82
175239_at	F15E11.15	hypothetical protein	positive regulation of growth rate	---	---	-6.58
175270_at	nhr-101	Nuclear Hormone Receptor family	transcription /// regulation of transcription, DNA-dependent	DNA binding /// transcription factor activity /// steroid hormone receptor activity /// receptor activity /// ligand-dependent nuclear receptor activity /// zinc ion binding /// sequence-specific DNA binding /// metal ion binding	nucleus	1.8
175278_at	Y37F4.2	---	---	---	---	2.03
175279_s_at	sek-1	SAPK/ERK kinase /// locus:sek-1	protein amino acid phosphorylation /// defense response /// oviposition /// innate immune response	protein kinase activity /// protein serine/threonine kinase activity /// protein tyrosine kinase activity /// protein binding /// ATP binding /// kinase activity	---	2.02
175284_at	F07A5.4	hypothetical protein /// status:Partially_confirmed	---	---	---	1.96
175286_at	---	---	---	---	---	-2.09
175288_at	K02F3.12	hypothetical protein	DNA recombination	nucleic acid binding /// helicase activity /// ATP binding /// ATP-dependent helicase activity	---	-1.87
175290_at	---	---	---	---	---	1.87
175297_at	D1046.5	hypothetical protein /// status:Partially_confirmed	---	---	membrane /// integral to membrane	1.85
175299_at	F10B5.8	hypothetical protein /// status:Partially_confirmed	embryonic development ending in birth or egg hatching	hydrolase activity	---	-1.82
175300_s_at	C11D9.1	hypothetical protein /// status:Partially_confirmed	regulation of Rho protein signal transduction	Rho guanyl-nucleotide exchange factor activity	intracellular	2.07
175304_at	F07H5.10	hypothetical protein /// status:Partially_confirmed	---	---	---	-1.88
175314_s_at	crn-6	Cell-death-Related Nuclease	DNA metabolic process /// DNA fragmentation during apoptosis /// DNA fragmentation during apoptosis /// apoptosis	nuclease activity /// deoxyribonuclease II activity /// hydrolase activity	---	-2.91
175323_at	gld-3	defective in Germ Line Development	reproduction /// nuclear division /// cytokinesis /// nematode larval development /// spermatogenesis /// embryonic development ending in birth or egg hatching /// germ-line sex determination /// positive regulation of multicellular organism growth /// regulation of meiosis /// feminization of hermaphroditic germ-line /// vulval development /// masculinization of hermaphroditic germ-line /// germ…	protein binding	---	-1.92
175324_s_at	zhp-3	locus:zhp-3 /// Zip (yeast meiotic zipper) Homologous Protein	meiotic chromosome segregation	protein binding /// zinc ion binding	---	-1.88
175329_s_at	cah-2	Carbonic AnHydrase /// locus:cah-2	one-carbon compound metabolic process	carbonate dehydratase activity /// protein binding /// zinc ion binding	extracellular region	2.49
175353_s_at	unc-89	UNCoordinated	carbohydrate metabolic process /// protein amino acid phosphorylation /// regulation of Rho protein signal transduction /// locomotion	protein kinase activity /// protein serine/threonine kinase activity /// protein tyrosine kinase activity /// vascular endothelial growth factor receptor activity /// Rho guanyl-nucleotide exchange factor activity /// ATP binding /// kinase activity /// transferase activity	intracellular	2.62
175354_at	olrn-1	Olfactory LeaRNing defective	olfactory learning	---	integral to membrane	1.87
175356_s_at	F56A11.6	hypothetical protein /// status:Partially_confirmed	---	---	integral to membrane	2.44
175358_s_at	T03F1.6	hypothetical protein	---	---	---	2.03
175370_at	lin-31	abnormal cell LINeage /// locus:lin-31	transcription /// regulation of transcription, DNA-dependent /// multicellular organismal development /// positive regulation of multicellular organism growth /// vulval development /// vulval development /// positive regulation of vulval development /// negative regulation of vulval development /// hermaphrodite genitalia development	DNA binding /// transcription factor activity /// sequence-specific DNA binding	nucleus	2.34
175371_at	R04E5.8	hypothetical protein	---	---	---	2.06
175375_at	Y65B4BR.8	status:Partially_confirmed /// hypothetical protein	embryonic development ending in birth or egg hatching /// body morphogenesis /// locomotion /// hermaphrodite genitalia development	---	---	-1.95
175381_at	mex-6	Muscle EXcess /// locus:mex-6	morphogenesis of an epithelium /// embryonic development ending in birth or egg hatching /// body morphogenesis /// regulation of protein localization /// positive regulation of growth rate /// locomotion	nucleic acid binding /// DNA binding /// protein binding /// zinc ion binding /// metal ion binding	nucleus	-1.82
175389_at	F53H4.4	hypothetical protein /// status:Partially_confirmed	---	---	---	1.91
175398_s_at	dhs-4	DeHydrogenases, Short chain /// locus:dhs-4	metabolic process /// enterobactin biosynthetic process	catalytic activity /// binding /// 2,3-dihydro-2,3-dihydroxybenzoate dehydrogenase activity /// oxidoreductase activity	---	-2.67
175403_s_at	K02C4.2	hypothetical protein /// status:Confirmed	---	---	---	-2.12
175411_at	---	---	---	---	---	-3.23
175418_s_at	F26H11.4	hypothetical protein /// status:Partially_confirmed	---	---	---	-1.89
175424_at	C40H1.7	hypothetical protein /// status:Partially_confirmed	lipid metabolic process	triacylglycerol lipase activity	---	-3.77
175425_at	aat-5	Amino Acid Transporter	transport /// amino acid transport	amino acid transmembrane transporter activity	membrane /// integral to membrane	2.5
175426_s_at	W06B11.1	hypothetical protein /// status:Confirmed	---	---	---	1.84
175428_at	srsx-34	Serpentine Receptor, class SX	---	receptor activity	integral to membrane	1.88
175430_s_at	glh-1	Germ-Line Helicase /// locus:glh-1	germ cell development /// post-embryonic development /// positive regulation of growth rate	nucleotide binding /// nucleic acid binding /// RNA binding /// helicase activity /// protein binding /// ATP binding /// ATP-dependent helicase activity /// zinc ion binding /// hydrolase activity /// identical protein binding /// metal ion binding	---	-1.86
175438_at	glb-11	GLoBin /// locus:glb-11	oxygen transport	iron ion binding /// oxygen binding /// heme binding	---	1.83
175441_s_at	Y54H5A.2	status:Confirmed /// hypothetical protein	reproduction /// embryonic development ending in birth or egg hatching	binding	---	1.85
175452_at	M176.5	hypothetical protein /// status:Confirmed	---	---	---	2.02
175461_at	his-2	HIStone /// locus:his-2	reproduction /// nematode larval development /// nucleosome assembly /// embryonic development ending in birth or egg hatching /// body morphogenesis /// growth /// positive regulation of growth rate /// locomotion	DNA binding	nucleosome /// nucleus /// chromosome	2.73
175463_at	nhr-109	Nuclear Hormone Receptor family	transcription /// regulation of transcription, DNA-dependent	DNA binding /// transcription factor activity /// steroid hormone receptor activity /// receptor activity /// ligand-dependent nuclear receptor activity /// zinc ion binding /// sequence-specific DNA binding /// metal ion binding	nucleus	3.26
175464_s_at	T11G6.5	hypothetical protein	---	---	---	-2.38
175471_s_at	T24D1.5	hypothetical protein /// status:Confirmed	---	protein binding /// zinc ion binding	---	-2.02
175480_at	---	---	---	---	---	-2.68
175481_at	F56B3.6	Hypothetical protein (F56B3.6)	---	---	integral to membrane	1.84
175486_at	---	---	---	---	---	2.19
175489_at	F18E3.11	hypothetical protein /// status:Confirmed	---	---	---	-1.91
175496_s_at	T23D8.7	hypothetical protein /// status:Partially_confirmed	---	nucleic acid binding	---	-1.86
175499_s_at	inx-21	INneXin /// locus:inx-21	embryonic development ending in birth or egg hatching	---	gap junction /// integral to membrane	-1.97
175502_at	F44D12.9	hypothetical protein /// status:Partially_confirmed	transport	nucleoside transmembrane transporter activity	membrane /// integral to membrane	-2.28
175504_at	F17C11.11	hypothetical protein /// status:Confirmed	---	---	---	-2.04
175512_s_at	C12C8.2	hypothetical protein	amino acid metabolic process	catalytic activity /// pyridoxal phosphate binding	---	-2.61
175531_s_at	Y37E11B.1	hypothetical protein	---	nucleic acid binding /// zinc ion binding	intracellular	2.37
175537_at	---	---	---	---	---	1.86
175546_at	R06C1.6	hypothetical protein /// status:Partially_confirmed	---	---	---	3.74
175549_s_at	ztf-15	Zinc finger Transcription Factor family	---	zinc ion binding	intracellular	-1.87
175550_at	tpxl-1	TPX2 (Targeting Protein for Xenopus Klp2)-Like	reproduction /// nematode larval development /// mitotic spindle organization /// embryonic development ending in birth or egg hatching	protein binding	---	-2.55
175555_s_at	ctg-2	CRAL/TRIO and GOLD domain containing /// locus:ctg-2	---	---	---	-1.88
175561_s_at	unc-44	UNCoordinated	carbohydrate metabolic process /// signal transduction /// body morphogenesis /// positive regulation of growth rate /// locomotion /// positive regulation of locomotion /// positive regulation of multicellular organism growth	hydrolase activity, hydrolyzing O-glycosyl compounds /// protein binding /// protein binding	---	2.53
175574_at	puf-11	PUF (Pumilio/FBF) domain-containing /// locus:puf-11	reproduction /// embryonic development ending in birth or egg hatching	RNA binding /// binding	---	-2.02
175580_s_at	F57C9.4	hypothetical protein	embryonic development ending in birth or egg hatching	nucleic acid binding /// protein binding /// zinc ion binding	intracellular	-1.97
175584_s_at	K05F1.5	hypothetical protein /// status:Partially_confirmed	---	zinc ion binding	intracellular	2.61
175588_s_at	F38E9.5	hypothetical protein /// protein tyrosine kinase	---	actin binding	intracellular	1.92
175603_at	unc-9	UNCoordinated /// locus:unc-9	locomotion	---	plasma membrane /// gap junction /// membrane /// integral to membrane /// cell junction	1.96
175614_at	mec-2	MEChanosensory abnormality	mechanosensory behavior /// response to mechanical stimulus	---	membrane /// integral to membrane	2.81
175628_at	eat-4	EATing: abnormal pharyngeal pumping /// locus:eat-4	reproduction /// transport /// ion transport /// sodium ion transport /// neurotransmitter transport /// regulation of pharyngeal pumping	transporter activity /// symporter activity /// sodium ion binding	plasma membrane /// membrane /// integral to membrane /// cell junction /// synapse	3.24
175640_at	jnk-1	Jun N-terminal Kinase	protein amino acid phosphorylation /// hyperosmotic response /// JNK cascade /// vesicle transport along actin filament	nucleotide binding /// protein kinase activity /// protein serine/threonine kinase activity /// MAP kinase activity /// protein tyrosine kinase activity /// protein binding /// ATP binding /// kinase activity /// transferase activity	---	2.03
175643_s_at	dbl-1	DPP/BMP-Like /// locus:dbl-1	nematode larval development /// positive regulation of DNA endoreduplication /// positive regulation of growth rate /// positive regulation of multicellular organism growth /// positive regulation of multicellular organism growth /// tail tip morphogenesis /// positive regulation of cell size /// positive regulation of organ growth	growth factor activity	extracellular region /// integral to membrane	3.14
175644_s_at	mdf-1	MAD (yeast Mitosis Arrest DeFicient) related /// locus:mdf-1	positive regulation of growth rate /// locomotion /// hermaphrodite genitalia development /// germline cell cycle switching, mitotic to meiotic cell cycle	---	---	-1.9
175648_at	mef-2	CeMef-2 (mef-2)	transcription /// regulation of transcription, DNA-dependent /// homoiothermy /// response to freezing	DNA binding /// transcription factor activity /// sequence-specific DNA binding /// ice binding	nucleus	2.27
175660_at	ptl-1	Protein with Tau-Like repeats	negative regulation of microtubule depolymerization	protein binding	---	2.76
175661_s_at	ptl-1	Protein with Tau-Like repeats	negative regulation of microtubule depolymerization	protein binding	---	2.01
175663_at	nhr-25	Nuclear Hormone Receptor family	reproduction /// nematode larval development /// transcription /// regulation of transcription, DNA-dependent /// multicellular organismal development /// gonad development /// embryonic development ending in birth or egg hatching /// body morphogenesis /// oviposition /// molting cycle, collagen and cuticulin-based cuticle /// positive regulation of growth rate /// locomotion /// positive regula…	DNA binding /// transcription factor activity /// steroid hormone receptor activity /// receptor activity /// ligand-dependent nuclear receptor activity /// zinc ion binding /// sequence-specific DNA binding /// metal ion binding	nucleus	2.07
175664_s_at	sma-2	SMAll /// locus:sma-2	transcription /// regulation of transcription, DNA-dependent /// transforming growth factor beta receptor signaling pathway /// positive regulation of growth rate /// positive regulation of multicellular organism growth /// positive regulation of multicellular organism growth /// tail tip morphogenesis	transcription factor activity /// protein binding /// protein binding	intracellular /// nucleus /// transcription factor complex /// cytoplasm	2.57
175684_at	lin-46	abnormal cell LINeage /// locus:lin-46	Mo-molybdopterin cofactor biosynthetic process /// molybdopterin cofactor biosynthetic process	---	---	1.98
175707_s_at	sem-4	SEx Muscle abnormal /// locus:sem-4	oviposition /// positive regulation of growth rate	nucleic acid binding /// protein binding /// zinc ion binding	intracellular	2.57
175710_s_at	lec-8	gaLECtin /// locus:lec-8	---	sugar binding	---	-2.28
175722_s_at	sax-1	Sensory AXon guidance	protein amino acid phosphorylation /// establishment or maintenance of cell polarity /// regulation of cell shape /// cell projection assembly /// negative regulation of cell growth /// neurite development	nucleotide binding /// protein kinase activity /// protein serine/threonine kinase activity /// protein tyrosine kinase activity /// ATP binding /// kinase activity /// transferase activity	---	1.85
175739_s_at	unc-26	UNCoordinated	positive regulation of neurotransmitter secretion /// muscle contraction /// cytoskeleton organization /// endosome organization /// gamma-aminobutyric acid transport /// acetylcholine transport /// vesicle organization /// synaptic vesicle budding from presynaptic membrane /// synaptic vesicle uncoating /// dephosphorylation /// locomotion /// positive regulation of multicellular organism growth…	nucleotide binding /// RNA binding /// inositol or phosphatidylinositol phosphatase activity /// phosphatidylinositol-4,5-bisphosphate 5-phosphatase activity	---	-1.89
175755_at	unc-3	UNCoordinated /// locus:unc-3	transcription /// regulation of transcription, DNA-dependent /// multicellular organismal development /// locomotion /// dauer larval development /// regulation of transcription	DNA binding /// zinc ion binding /// transcription regulator activity /// metal ion binding	nucleus	2.03
175760_at	fibrulin-1D	hypothetical protein	multicellular organismal development	calcium ion binding /// protein binding	extracellular region /// proteinaceous extracellular matrix /// basement membrane	2.79
175770_s_at	flp-11	FMRF-Like Peptide	neuropeptide signaling pathway	---	extracellular region /// integral to membrane	2.01
175771_at	nob-1	kNOB-like posterior (NO Backside)	regulation of transcription, DNA-dependent /// embryonic development ending in birth or egg hatching /// embryonic pattern specification /// anterior/posterior pattern formation /// body morphogenesis /// embryonic body morphogenesis /// positive regulation of growth rate /// tail tip morphogenesis /// regulation of transcription	DNA binding /// transcription factor activity /// protein binding /// transcription regulator activity /// sequence-specific DNA binding	nucleus	1.87
175772_s_at	ser-4	SERotonin/octopamine receptor family /// locus:ser-4	signal transduction /// G-protein coupled receptor protein signaling pathway /// negative regulation of locomotion	signal transducer activity /// receptor activity /// G-protein coupled receptor activity	plasma membrane /// membrane /// integral to membrane	1.82
175776_s_at	aqp-4	AQuaPorin or aquaglyceroporin related /// locus:aqp-4	transcription /// regulation of transcription, DNA-dependent /// transport /// signal transduction /// multicellular organismal development /// regulation of transcription	DNA binding /// transcription factor activity /// signal transducer activity /// transporter activity /// protein binding	nucleus /// cytoplasm /// membrane /// integral to membrane	2.13
175780_at	pkc-2	Protein Kinase C	protein amino acid phosphorylation /// intracellular signaling cascade	nucleotide binding /// protein kinase activity /// protein serine/threonine kinase activity /// protein kinase C activity /// protein tyrosine kinase activity /// ATP binding /// zinc ion binding /// kinase activity /// transferase activity /// diacylglycerol binding /// metal ion binding	integral to membrane	2.36
175791_at	gar-3	G-protein-linked Acetylcholine Receptor	regulation of action potential /// signal transduction /// G-protein coupled receptor protein signaling pathway /// acetylcholine receptor signaling, muscarinic pathway /// acetylcholine receptor signaling, muscarinic pathway /// regulation of pharyngeal pumping /// regulation of pharyngeal pumping	signal transducer activity /// receptor activity /// G-protein coupled receptor activity /// muscarinic acetylcholine receptor activity	plasma membrane /// membrane /// integral to membrane	2.42
175798_at	opt-3	OligoPeptide Transporter /// locus:opt-3	transport /// oligopeptide transport /// meiotic chromosome segregation	transporter activity /// oligopeptide transporter activity	membrane /// integral to membrane	2.3
175801_at	elt-3	Erythroid-Like Transcription factor family /// locus:elt-3	regulation of transcription, DNA-dependent /// defense response /// determination of adult life span /// embryonic development ending in birth or egg hatching	transcription factor activity /// zinc ion binding /// sequence-specific DNA binding /// metal ion binding	nucleus	1.9
175827_at	des-2	DEgeneration Suppressor /// locus:des-2	transport /// ion transport	receptor activity /// ion channel activity /// extracellular ligand-gated ion channel activity /// neurotransmitter receptor activity	plasma membrane /// membrane /// integral to membrane /// postsynaptic membrane	2.24
175830_at	lin-48	abnormal cell LINeage	regulation of transcription, DNA-dependent /// hindgut morphogenesis /// tail tip morphogenesis	nucleic acid binding /// zinc ion binding	intracellular	1.83
175832_s_at	ego-1	Enhancer of Glp-One (glp-1) /// locus:ego-1	cytokinesis /// nematode larval development /// G-protein coupled receptor protein signaling pathway /// embryonic development ending in birth or egg hatching /// body morphogenesis /// positive regulation of growth rate	RNA-directed RNA polymerase activity	integral to membrane	-1.97
175837_s_at	efk-1	Elongation Factor Kinase	protein amino acid phosphorylation	nucleotide binding /// protein serine/threonine kinase activity /// elongation factor-2 kinase activity /// binding /// calcium ion binding /// calmodulin binding /// ATP binding /// kinase activity /// transferase activity	---	2.18
175850_at	R05G9.2	hypothetical protein	---	---	integral to membrane	2.13
175852_at	R05G9.3	hypothetical protein /// status:Partially_confirmed	embryonic development ending in birth or egg hatching	---	integral to membrane	-1.81
175871_at	---	---	---	---	---	-3.59
175897_at	ZK105.5	status:Partially_confirmed /// hypothetical protein	---	---	---	2.28
175898_at	ZK105.1	status:Partially_confirmed /// hypothetical protein	---	---	---	-2.45
175904_s_at	fbxa-152	F-box A protein /// F-box A protein /// locus:fbxa-152 /// locus:fbxa-222	---	---	---	2.06
175904_s_at	fbxa-222	F-box A protein /// F-box A protein /// locus:fbxa-152 /// locus:fbxa-222	---	---	---	2.06
175928_at	---	---	---	---	---	-2.26
175953_at	F41G4.8	hypothetical protein /// status:Partially_confirmed	---	---	---	2.29
175960_s_at	R13A5.9	hypothetical protein /// status:Partially_confirmed	---	---	integral to membrane	1.87
175993_at	gsto-1	Glutathione S-Transferase, Omega class /// locus:gsto-1	morphogenesis of an epithelium /// metabolic process /// embryonic development ending in birth or egg hatching /// oviposition /// positive regulation of growth rate /// locomotion /// hermaphrodite genitalia development	glutathione transferase activity /// transferase activity	cytoplasm	-2.08
176002_at	M02H5.8	hypothetical protein /// status:Partially_confirmed	---	---	---	-2.35
176021_at	ekl-4	Enhancer of Ksr-1 Lethality	reproduction /// gastrulation with mouth forming first /// embryonic development /// embryonic development ending in birth or egg hatching /// negative regulation of transcription /// positive regulation of growth rate /// locomotion /// hermaphrodite genitalia development	DNA binding	nucleus	-1.82
176022_at	npp-15	Nuclear Pore complex Protein /// locus:npp-15	transport /// multicellular organismal development /// embryonic development ending in birth or egg hatching /// protein transport /// mRNA transport /// intracellular protein transmembrane transport	---	nucleus /// nuclear pore /// integral to membrane	-2.12
176044_at	Y41D4B.16	status:Confirmed /// hypothetical protein	---	---	---	-2.58
176053_s_at	clec-160	C-type LECtin /// locus:clec-160	---	binding /// sugar binding	---	-3.47
176069_s_at	C07H6.3	hypothetical protein /// status:Partially_confirmed	reproduction /// positive regulation of multicellular organism growth	binding	cytoplasm /// cytoskeleton /// microtubule	2
176072_at	nhr-122	Nuclear Hormone Receptor family /// locus:nhr-122	transcription /// regulation of transcription, DNA-dependent	DNA binding /// transcription factor activity /// steroid hormone receptor activity /// receptor activity /// zinc ion binding /// sequence-specific DNA binding /// metal ion binding	nucleus	2
176104_at	Y41D4B.17	status:Confirmed /// hypothetical protein	---	---	---	-2.54
176105_s_at	C08C3.4	hypothetical protein	reproduction	protein binding	---	-2
176108_at	nhr-274	Nuclear Hormone Receptor family /// locus:nhr-274	transcription /// regulation of transcription, DNA-dependent	DNA binding /// transcription factor activity /// steroid hormone receptor activity /// receptor activity /// zinc ion binding /// sequence-specific DNA binding /// metal ion binding	nucleus	4.49
176119_at	vps-20	locus:vps-20 /// hypothetical protein	nematode larval development /// protein transport /// growth /// positive regulation of growth rate /// locomotion	---	---	1.83
176120_s_at	E01A2.7	hypothetical protein /// status:Confirmed	---	arylesterase activity	integral to membrane	-2.76
176123_at	Y65B4A.7	status:Confirmed /// hypothetical protein	---	protein binding /// zinc ion binding	---	1.82
176142_at	glb-32	GLoBin /// locus:glb-32	oxygen transport	iron ion binding /// oxygen binding /// heme binding	---	2.08
176151_at	ZK688.9	status:Confirmed /// hypothetical protein	oviposition /// locomotion	---	---	1.91
176152_at	bath-15	BTB and MATH domain containing /// locus:bath-15	ubiquitin-dependent protein catabolic process	protein binding	---	-1.96
176154_at	F42A9.7	hypothetical protein /// status:Partially_confirmed	---	structural molecule activity	---	2.82
176191_at	Y71H2AM.7	status:Confirmed /// hypothetical protein	---	---	---	-1.89
176212_at	fbxa-151	F-box A protein /// F-box A protein /// locus:fbxa-151 /// locus:fbxa-78	---	---	---	-7.54
176212_at	fbxa-78	F-box A protein /// F-box A protein /// locus:fbxa-151 /// locus:fbxa-78	---	---	---	-7.54
176258_at	Y52E8A.2	status:Confirmed /// hypothetical protein	---	protein binding /// zinc ion binding	---	-1.82
176271_at	C52D10.1	hypothetical protein /// status:Partially_confirmed	---	---	---	-1.92
176293_at	Y71G12B.17	status:Partially_confirmed /// hypothetical protein	transport	---	intracellular	1.83
176369_s_at	Y22D7AL.10	status:Confirmed /// hypothetical protein	protein folding /// embryonic development ending in birth or egg hatching	ATP binding	---	-1.89
176374_at	Y22D7AL.6	hypothetical protein	---	---	---	1.83
176393_s_at	Y105E8B.3	status:Confirmed /// hypothetical protein	protein amino acid phosphorylation /// embryonic development ending in birth or egg hatching	protein serine/threonine kinase activity /// ATP binding	---	2
176401_s_at	Y57E12B.4	status:Partially_confirmed /// hypothetical protein	---	---	integral to membrane	-2.24
176407_at	F28A10.1	hypothetical protein /// status:Predicted	---	---	---	4.89
176414_s_at	C30F12.2	hypothetical protein /// status:Partially_confirmed	embryonic development ending in birth or egg hatching	ATP binding	---	-2.49
176419_at	Y71G12B.27	status:Partially_confirmed /// hypothetical protein	cell cycle	protein binding /// cyclin-dependent protein kinase regulator activity	---	2.45
176432_at	Y105E8B.7	status:Confirmed /// hypothetical protein	regulation of transcription, DNA-dependent	---	nucleus	2.38
176439_at	F54H12.8	hypothetical protein /// status:Partially_confirmed	---	---	integral to membrane	1.93
176451_at	siah-1	SInA (Drosophila Seven In Absentia) Homolog /// locus:siah-1	ubiquitin-dependent protein catabolic process /// multicellular organismal development	protein binding /// zinc ion binding /// acid-amino acid ligase activity	nucleus	2.04
176457_at	icp-1	InCenP homolog /// locus:icp-1	reproduction /// cytokinesis /// embryonic development ending in birth or egg hatching	protein binding	---	-1.99
176468_s_at	Y102A11A.2	hypothetical protein	---	protein binding	---	2.75
176472_s_at	Y54F10AM.11	status:Confirmed /// hypothetical protein	---	protein binding	---	-2.3
176490_s_at	Y39G10AR.16	status:Partially_confirmed /// hypothetical protein	---	---	integral to membrane	1.81
176500_at	zwl-1	locus:zwl-1 /// ZWiLch (Drosophila) homolog	transport /// cell cycle /// mitosis /// mitotic cell cycle checkpoint /// embryonic development ending in birth or egg hatching /// cell division	transporter activity /// lipid binding	condensed chromosome kinetochore	-1.92
176513_s_at	afd-1	AFaDin (actin filament binding protein) homolog	signal transduction /// positive regulation of growth rate	protein binding /// protein binding	---	2.85
176542_at	---	status:Partially_confirmed /// hypothetical protein	---	---	integral to membrane	-2.47
176544_at	Y71G12B.4	status:Confirmed /// hypothetical protein	peptide metabolic process /// cellular process /// oxidation reduction	catalytic activity /// monooxygenase activity /// peptidylglycine monooxygenase activity /// copper ion binding /// oxidoreductase activity /// metal ion binding	extracellular region /// membrane	2.22
176555_at	Y39H10A.1	status:Confirmed /// hypothetical protein	---	---	integral to membrane	2.65
176571_at	ncr-2	NPC1 (human Niemann Pick C disease) Related /// locus:ncr-2	multicellular organismal development	hedgehog receptor activity	membrane /// integral to membrane	3.38
176573_s_at	mec-4	MEChanosensory abnormality /// locus:mec-4	transport /// ion transport /// sodium ion transport /// mechanosensory behavior /// cell death /// response to mechanical stimulus /// regulation of non-apoptotic programmed cell death	ion channel activity /// sodium channel activity /// sodium ion binding	membrane /// integral to membrane	1.84
176576_at	cup-5	Coelomocyte UPtake defective	ion transport /// apoptosis /// regulation of endocytosis	ion channel activity /// calcium channel activity /// protein binding	membrane /// integral to membrane	-1.93
176583_at	Y97E10AL.1	status:Partially_confirmed /// hypothetical protein	---	---	integral to membrane	7.37
176600_s_at	gpd-2	GPD (glyceraldehyde 3-phosphate dehydrogenase) /// Mitochondrial ATPase Inhibitor family /// locus:gpd-2 /// locus:mai-1	glucose metabolic process /// glycolysis /// metabolic process /// determination of adult life span /// negative regulation of nucleotide metabolic process /// oxidation reduction	catalytic activity /// glyceraldehyde-3-phosphate dehydrogenase (phosphorylating) activity /// enzyme inhibitor activity /// binding /// protein binding /// glyceraldehyde-3-phosphate dehydrogenase activity /// oxidoreductase activity /// NAD binding	cytoplasm /// mitochondrion	3.27
176600_s_at	mai-1	GPD (glyceraldehyde 3-phosphate dehydrogenase) /// Mitochondrial ATPase Inhibitor family /// locus:gpd-2 /// locus:mai-1	glucose metabolic process /// glycolysis /// metabolic process /// determination of adult life span /// negative regulation of nucleotide metabolic process /// oxidation reduction	catalytic activity /// glyceraldehyde-3-phosphate dehydrogenase (phosphorylating) activity /// enzyme inhibitor activity /// binding /// protein binding /// glyceraldehyde-3-phosphate dehydrogenase activity /// oxidoreductase activity /// NAD binding	cytoplasm /// mitochondrion	3.27
176606_at	spe-11	defective SPErmatogenesis /// locus:spe-11	multicellular organismal development /// spermatogenesis /// cell differentiation	---	cytoplasm	3.48
176619_s_at	lin-44	abnormal cell LINeage	Wnt receptor signaling pathway, calcium modulating pathway /// multicellular organismal development /// Wnt receptor signaling pathway /// positive regulation of growth rate	signal transducer activity	extracellular region /// proteinaceous extracellular matrix	2.25
176628_at	ceh-1	Homeobox /// locus:ceh-1	regulation of transcription, DNA-dependent /// multicellular organismal development /// regulation of transcription	DNA binding /// transcription factor activity /// transcription regulator activity /// sequence-specific DNA binding	nucleus	1.95
176633_at	JC8.5	hypothetical protein /// status:Confirmed	reproduction /// positive regulation of growth rate	copper ion binding	integral to membrane	-1.81
176640_s_at	sdz-25	SKN-1 Dependent Zygotic transcript /// locus:sdz-25	---	---	---	-2.06
176641_at	Y92H12BL.4	---	---	---	---	1.9
176642_at	F58H1.5	hypothetical protein /// status:Confirmed	---	---	integral to membrane	1.9
176663_s_at	unc-44	UNCoordinated	carbohydrate metabolic process /// signal transduction /// body morphogenesis /// positive regulation of growth rate /// locomotion /// positive regulation of locomotion /// positive regulation of multicellular organism growth	hydrolase activity, hydrolyzing O-glycosyl compounds /// protein binding /// protein binding	---	3.38
176673_at	C18B2.1	hypothetical protein /// status:Partially_confirmed	embryonic development ending in birth or egg hatching	---	membrane /// integral to membrane	1.91
176682_at	F35B3.7	hypothetical protein /// status:Partially_confirmed	---	---	---	2.7
176697_at	C52E2.4	hypothetical protein /// status:Partially_confirmed	---	---	---	2.4
176704_at	Y66A7A.5	status:Partially_confirmed /// hypothetical protein	reproduction /// regulation of transcription, DNA-dependent /// hermaphrodite genitalia development /// regulation of transcription	DNA binding /// transcription factor activity /// sequence-specific DNA binding	nucleus	-2.42
176710_at	B0361.2	hypothetical protein	reproduction	---	---	-1.83
176731_at	Y54H5A.2	status:Confirmed /// hypothetical protein	reproduction /// embryonic development ending in birth or egg hatching	binding	---	1.92
176739_at	D2062.1	hypothetical protein /// status:Partially_confirmed	---	---	extracellular region	2.17
176747_s_at	gsp-2	yeast Glc Seven-like Phosphatases /// locus:gsp-2	cytokinesis /// cell cycle /// mitosis /// meiosis /// meiosis /// multicellular organismal development /// embryonic development ending in birth or egg hatching /// chromatin modification /// oviposition /// molting cycle, collagen and cuticulin-based cuticle /// locomotion /// meiotic chromosome segregation /// cell division	phosphoprotein phosphatase activity /// iron ion binding /// hydrolase activity /// manganese ion binding /// metal ion binding	nucleus /// cytoplasm	2.09
176778_s_at	rrf-2	RNA-dependent RNA polymerase Family /// locus:rrf-2	---	---	---	1.81
176796_at	C17G10.3	hypothetical protein /// hypothetical protein /// status:Confirmed /// status:Partially_confirmed	---	---	---	2.54
176796_at	R09E10.1	hypothetical protein /// hypothetical protein /// status:Confirmed /// status:Partially_confirmed	---	---	---	2.54
176801_s_at	Y51H7C.9	status:Partially_confirmed /// hypothetical protein	morphogenesis of an epithelium /// metabolic process /// positive regulation of growth rate /// locomotion /// hermaphrodite genitalia development	catalytic activity /// amino acid binding /// pyridoxal phosphate binding	---	2.22
176806_at	F45E4.3	hypothetical protein	---	protein binding	---	2.01
176811_s_at	H31G24.3	hypothetical protein /// BTB (also known as BR-C/Ttk) domain. /// status:Partially_confirmed /// hypothetical protein	embryonic development ending in birth or egg hatching	protein binding	---	-2.99
176818_s_at	tag-278	Temporarily Assigned Gene name /// locus:tag-278	---	---	---	2.07
176851_at	Y40B10A.6	status:Partially_confirmed /// hypothetical protein	---	O-methyltransferase activity	---	-5.97
176863_at	ZK616.7	status:Partially_confirmed /// hypothetical protein	protein amino acid dephosphorylation /// dephosphorylation	protein tyrosine phosphatase activity /// phosphatase activity	---	2.27
176890_at	Y23H5B.1	status:Predicted /// hypothetical protein	---	---	integral to membrane	2.74
176930_at	spd-1	SPindle Defective /// locus:spd-1	reproduction /// morphogenesis of an epithelium /// cytokinesis, completion of separation /// gonad development /// embryonic development ending in birth or egg hatching /// body morphogenesis /// oviposition /// positive regulation of growth rate /// locomotion /// regulation of multicellular organism growth /// negative regulation of multicellular organism growth /// positive regulation of loco…	---	---	-1.97
176938_at	Y48G9A.12	status:Predicted /// hypothetical protein	---	---	---	2
176940_at	Y42H9B.3	status:Confirmed /// hypothetical protein	---	---	---	-1.82
176945_at	adpr-1	ADiPose (Drosophila obesity gene) Related /// locus:adpr-1	---	binding	---	-1.83
176955_at	ech-7	Enoyl-CoA Hydratase /// locus:ech-7	metabolic process	catalytic activity	---	2.12
176965_at	cpt-3	Carnitine Palmitoyl Transferase /// locus:cpt-3	proteolysis	cysteine-type endopeptidase activity /// acyltransferase activity /// transferase activity	integral to membrane	-2.02
176970_at	Y105E8A.8	status:Partially_confirmed /// hypothetical protein	---	---	---	-1.88
176973_s_at	M7.9	hypothetical protein /// status:Partially_confirmed	---	---	---	-14.52
176988_at	Y105E8A.8	status:Partially_confirmed /// hypothetical protein	---	---	---	-2.68
176996_at	Y54G2A.15	status:Partially_confirmed /// hypothetical protein	reproduction	---	---	3.42
177000_at	Y54G2A.26	hypothetical protein	---	protein binding	---	3.54
177006_s_at	Y54G2A.29	status:Partially_confirmed /// hypothetical protein	---	---	---	1.8
177051_at	mif-4	MIF (macrophage migration inhibitory factor) related /// locus:mif-4	---	---	---	3.3
177053_at	Y42H9AR.2	status:Partially_confirmed /// hypothetical protein	---	---	integral to membrane	2.2
177065_at	vit-1	VITellogenin structural genes (yolk protein genes) /// locus:vit-1	lipid transport	lipid transporter activity /// nutrient reservoir activity	extracellular region	-2.45
177066_at	Y34B4A.5	status:Confirmed /// status:Confirmed /// hypothetical protein /// hypothetical protein	---	---	---	-1.8
177090_at	vps-32.2	hypothetical protein /// related to yeast Vacuolar Protein Sorting factor /// status:Predicted /// status:Predicted /// locus:vps-32.2 /// status:Partially_confirmed /// hypothetical protein /// hypothetical protein	nematode larval development /// embryonic development ending in birth or egg hatching /// protein transport /// molting cycle, collagen and cuticulin-based cuticle /// growth /// positive regulation of growth rate /// locomotion	---	---	-1.98
177094_s_at	clec-73	C-type LECtin /// locus:clec-73	---	binding /// protein binding /// sugar binding	integral to membrane	2.72
177104_at	clec-70	C-type LECtin /// locus:clec-70	---	binding /// sugar binding	---	-5.09
177115_at	M28.10	hypothetical protein /// status:Confirmed	---	---	---	-3.12
177120_s_at	nlp-15	Neuropeptide-Like Protein /// locus:nlp-15	---	---	integral to membrane	2.49
177124_at	Y19D10B.6	status:Partially_confirmed /// hypothetical protein	proteolysis	metalloendopeptidase activity	membrane	3.37
177131_s_at	F15E11.13	hypothetical protein /// status:Partially_confirmed /// status:Partially_confirmed /// hypothetical protein	---	---	---	-11.27
177147_at	spe-10	defective SPErmatogenesis /// locus:spe-10	membrane fusion /// organelle organization /// spermatid development /// sperm motility /// pseudopodium organization /// establishment of nucleus localization /// positive regulation of cell size /// localization	zinc ion binding /// metal ion binding	integral to membrane	3.4
177148_s_at	gcy-28	Guanylyl CYclase	protein amino acid phosphorylation /// intracellular signaling cascade /// cyclic nucleotide biosynthetic process	guanylate cyclase activity /// protein kinase activity /// protein serine/threonine kinase activity /// protein tyrosine kinase activity /// ATP binding /// peptide receptor activity, G-protein coupled /// phosphorus-oxygen lyase activity	membrane /// integral to membrane	2.61
177160_at	Y38C1AA.7	status:Confirmed /// hypothetical protein	---	protein binding	integral to membrane	1.94
177179_at	sos-1	Drosophila SOS homolog /// locus:sos-1	small GTPase mediated signal transduction /// female gamete generation /// embryonic development /// embryonic development ending in birth or egg hatching /// body morphogenesis /// cell migration /// oviposition /// regulation of Rho protein signal transduction /// positive regulation of growth rate /// positive regulation of vulval development /// regulation of small GTPase mediated signal tran…	DNA binding /// guanyl-nucleotide exchange factor activity /// Rho guanyl-nucleotide exchange factor activity	intracellular	1.81
177199_s_at	M28.9	hypothetical protein /// status:Partially_confirmed	---	---	integral to membrane	2.14
177213_at	Y53G8AM.1	---	---	---	---	3.29
177224_at	mfb-1	MAFBx (F-box protein) homolog /// locus:mfb-1	proteolysis /// dauer entry	aspartic-type endopeptidase activity /// protein binding	---	2.19
177233_s_at	Y54E10BR.4	status:Confirmed /// hypothetical protein	reproduction /// nematode larval development /// growth /// positive regulation of growth rate /// hermaphrodite genitalia development	---	---	2.29
177250_at	M162.5	hypothetical protein /// status:Partially_confirmed	transport	transporter activity	integral to membrane	3.03
177253_at	R186.1	hypothetical protein /// status:Confirmed	embryonic development ending in birth or egg hatching	---	---	2.2
177264_at	M110.3	hypothetical protein /// status:Confirmed	---	zinc ion binding	---	-1.81
177265_s_at	ztf-23	locus:ztf-23 /// Zinc finger Transcription Factor family	negative regulation of multicellular organism growth	nucleic acid binding /// protein binding /// zinc ion binding	intracellular	-2.04
177276_at	ZK6.8	status:Partially_confirmed /// hypothetical protein	---	---	integral to membrane	3.91
177293_s_at	Y37E11AL.3	hypothetical protein	---	---	---	-2.06
177312_at	Y59H11AR.4	status:Predicted /// hypothetical protein	---	---	membrane /// integral to membrane	2.11
177316_at	sdz-28	SKN-1 Dependent Zygotic transcript /// locus:sdz-28	embryonic development ending in birth or egg hatching	protein binding	---	-2.88
177369_at	math-35	MATH (meprin-associated Traf homology) domain containing /// locus:math-35	---	---	---	2
177373_s_at	JC8.11T23B5.1	hypothetical protein /// hypothetical protein	---	---	---	-2
177374_at	LLC1.2	hypothetical protein /// status:Confirmed	---	---	---	-2.1
177378_at	math-36	MATH (meprin-associated Traf homology) domain containing /// locus:math-36	---	---	---	-2.44
177397_at	srg-32	Serpentine Receptor, class G (gamma) /// locus:srg-32	signal transduction /// sensory perception of chemical stimulus	transmembrane receptor activity	membrane /// integral to membrane	1.88
177415_s_at	B0546.5	hypothetical protein /// hypothetical protein /// hypothetical protein /// status:Partially_confirmed /// status:Predicted /// status:Partially_confirmed	---	---	integral to membrane	-2.05
177415_s_at	F16D3.6	hypothetical protein /// hypothetical protein /// hypothetical protein /// status:Partially_confirmed /// status:Predicted /// status:Partially_confirmed	---	---	integral to membrane	-2.05
177415_s_at	F35E2.1	hypothetical protein /// hypothetical protein /// hypothetical protein /// status:Partially_confirmed /// status:Predicted /// status:Partially_confirmed	---	---	integral to membrane	-2.05
177416_at	sru-40	Serpentine Receptor, class U /// locus:sru-40	---	---	integral to membrane	-3.11
177424_at	T01E8.1	hypothetical protein /// status:Partially_confirmed	---	---	---	2.31
177447_s_at	F32H2.7	hypothetical protein /// status:Confirmed	---	---	---	2.65
177457_at	C07B5.3	hypothetical protein /// status:Partially_confirmed	---	---	---	2.38
177477_at	F58A3.4	hypothetical protein /// status:Partially_confirmed	---	structural molecule activity	---	2.43
177478_at	D1086.2	hypothetical protein	---	---	---	3.13
177486_s_at	F31C3.6	hypothetical protein	---	---	integral to membrane	2.66
177496_at	D1086.1	hypothetical protein /// status:Confirmed	---	---	---	-1.97
177498_at	D2030.8	hypothetical protein /// status:Partially_confirmed	metabolic process	catalytic activity /// ATP binding /// hydrolase activity	---	-2.07
177518_at	T28F3.9	hypothetical protein /// status:Partially_confirmed	---	acetylglucosaminyltransferase activity	membrane /// integral to membrane	1.85
177539_at	ZK858.2	status:Partially_confirmed /// hypothetical protein	---	protein binding	---	2.43
177543_s_at	F13A7.1	hypothetical protein /// status:Confirmed	---	structural molecule activity	---	1.99
177555_at	F09B9.4	hypothetical protein /// status:Confirmed	---	---	---	1.83
177558_at	F41E7.2	hypothetical protein /// status:Partially_confirmed	regulation of pH	solute:hydrogen antiporter activity	integral to membrane	3.51
177579_at	K03D3.5	hypothetical protein /// status:Partially_confirmed	---	---	---	-18.8
177592_at	F55C5.4	hypothetical protein /// status:Partially_confirmed	embryonic development ending in birth or egg hatching /// collagen and cuticulin-based cuticle development /// positive regulation of growth rate /// locomotion /// hermaphrodite genitalia development	binding	---	-1.92
177607_s_at	F22B5.5	hypothetical protein /// status:Partially_confirmed	---	---	---	3.7
177622_at	hcp-2	HoloCentric chromosome binding Protein /// locus:hcp-2	protein localization /// embryonic development ending in birth or egg hatching /// meiotic chromosome segregation /// mitotic sister chromatid separation	protein binding	---	-2.57
177627_at	F10A3.1	hypothetical protein /// status:Partially_confirmed	---	---	integral to membrane	-1.85
177644_s_at	F58E6.5	hypothetical protein /// status:Confirmed	---	structural molecule activity	---	1.97
177646_at	ZK809.5	hypothetical protein	G-protein coupled receptor protein signaling pathway /// embryonic development ending in birth or egg hatching	signal transducer activity	heterotrimeric G-protein complex	-1.96
177658_at	F46C3.2	hypothetical protein /// status:Partially_confirmed	---	---	integral to membrane	-2.23
177662_at	ZC443.4	status:Confirmed /// hypothetical protein	---	---	---	1.87
177663_at	F35H8.4	hypothetical protein /// status:Partially_confirmed	---	---	integral to membrane	1.81
177666_at	D1086.5	hypothetical protein /// status:Confirmed	---	---	---	2.58
177671_at	K03D3.2	hypothetical protein /// status:Predicted	---	---	---	2.42
177687_at	K09G1.2	hypothetical protein /// status:Partially_confirmed	---	---	integral to membrane	1.85
177690_at	ZK593.2	status:Partially_confirmed /// hypothetical protein	---	---	---	2.21
177691_at	srg-47	Serpentine Receptor, class G (gamma) /// locus:srg-47	sensory perception of chemical stimulus	transmembrane receptor activity	membrane /// integral to membrane	2.01
177692_at	R11A8.1	hypothetical protein /// status:Partially_confirmed	---	---	---	-2.45
177698_s_at	T23G4.3	hypothetical protein /// status:Partially_confirmed	---	---	---	-2.11
177706_at	F58D5.7	hypothetical protein /// status:Confirmed	---	---	---	3.44
177731_at	F54F7.6	hypothetical protein /// status:Partially_confirmed	---	---	integral to membrane	-1.84
177735_at	F02H6.2	hypothetical protein /// status:Partially_confirmed	---	---	---	-2.76
177736_at	T01H3.4	hypothetical protein /// status:Confirmed	reproduction /// metabolic process /// embryonic development ending in birth or egg hatching	catalytic activity /// binding	integral to membrane	-2.24
177760_at	ndc-80	Yeast NDC (nuclear division cycle) homolog /// locus:ndc-80	reproduction /// cytokinesis /// morphogenesis of an epithelium /// cell cycle /// mitosis /// meiosis /// embryonic development ending in birth or egg hatching /// regulation of cell migration /// gonad morphogenesis /// locomotion /// hermaphrodite genitalia development /// cell division /// cell division	protein binding	condensed chromosome kinetochore /// nucleus	-2.03
177766_at	F15D3.8	hypothetical protein /// status:Partially_confirmed	---	---	---	-2.51
177769_at	D1086.18	hypothetical protein /// status:Predicted	---	---	---	1.9
177777_at	C04G2.9	hypothetical protein /// status:Confirmed	---	---	---	1.84
177778_at	F15D3.7	hypothetical protein /// status:Confirmed	reproduction /// embryonic development ending in birth or egg hatching /// protein transport /// hermaphrodite genitalia development	protein transporter activity	mitochondrial inner membrane	2.11
177779_s_at	F15D3.7	hypothetical protein /// status:Confirmed	reproduction /// embryonic development ending in birth or egg hatching /// protein transport /// hermaphrodite genitalia development	protein transporter activity	mitochondrial inner membrane	1.86
177785_s_at	T04D3.5	hypothetical protein /// status:Confirmed	nematode larval development /// embryonic development ending in birth or egg hatching /// growth	---	---	-1.89
177794_at	T05B9.1	hypothetical protein /// status:Confirmed	---	---	---	-1.98
177801_at	clec-230	C-type LECtin /// locus:clec-230	---	binding	---	1.96
177803_at	F36D3.8	hypothetical protein /// status:Partially_confirmed	---	---	---	2.26
177808_at	R11H6.4	hypothetical protein /// status:Confirmed	---	---	---	1.9
177810_s_at	F28D1.2	hypothetical protein /// status:Confirmed	embryonic development ending in birth or egg hatching	protein binding	---	-3.21
177823_at	F18H3.1	hypothetical protein /// status:Confirmed	---	---	---	2.07
177827_at	T19C4.5	hypothetical protein	oxygen transport	iron ion binding /// oxygen binding /// heme binding	---	2.43
177828_at	F02H6.4	hypothetical protein /// status:Predicted	---	---	---	-2.51
177836_s_at	R10E9.2	hypothetical protein /// status:Confirmed	---	---	---	2.63
177839_s_at	Y69H2.3	hypothetical protein	---	protein binding	---	1.92
177842_at	T22C8.6	hypothetical protein /// status:Partially_confirmed	---	---	---	3.21
177866_at	T13F2.4	hypothetical protein /// status:Predicted	---	---	---	1.88
177867_at	F23B2.7	hypothetical protein	---	---	integral to membrane	1.92
177873_at	F21D9.4	hypothetical protein /// status:Partially_confirmed	---	---	---	2.92
177874_s_at	sss-1	Sperm-Specific family, class S /// hypothetical protein /// locus:sss-1 /// status:Confirmed	---	protein binding	---	2.89
177891_s_at	acl-3	ACyLtransferase-like /// locus:acl-3	metabolic process	acyltransferase activity	---	-1.94
177897_at	K03H1.7	hypothetical protein /// status:Confirmed	---	---	---	-1.96
177906_s_at	F14F7.4	hypothetical protein /// status:Partially_confirmed	---	---	integral to membrane	2.86
177910_at	C54G4.3	hypothetical protein /// status:Partially_confirmed	---	---	---	4.24
177920_at	D1086.3	hypothetical protein /// status:Confirmed	---	---	---	-18.75
177924_s_at	F21D9.2	hypothetical protein /// status:Partially_confirmed	reproduction	---	integral to membrane	1.92
177930_at	Y7A5A.6	status:Predicted /// hypothetical protein	---	---	---	2.88
177935_at	T05F1.2	hypothetical protein /// status:Confirmed	---	---	---	-2.17
177936_s_at	Y7A5A.1	status:Confirmed /// hypothetical protein	---	catalytic activity /// oxidoreductase activity /// FAD binding	integral to membrane	-2.69
177951_s_at	PDB1.1	hypothetical protein	cation transport	cation transmembrane transporter activity	membrane /// integral to membrane	-2.93
177957_at	C52E4.7	hypothetical protein /// status:Confirmed	---	---	---	2.95
177958_at	F36D1.7	hypothetical protein /// status:Confirmed	---	---	---	1.88
177962_at	K04G2.4	hypothetical protein /// status:Confirmed	embryonic development ending in birth or egg hatching	---	---	2.35
177964_at	F37A8.1	hypothetical protein /// status:Partially_confirmed	---	---	---	2.33
177976_at	C34D1.4	hypothetical protein /// status:Partially_confirmed	---	---	integral to membrane	2.06
177982_at	W03C9.1	hypothetical protein /// status:Partially_confirmed	---	---	integral to membrane	2.06
177987_at	C28D4.7	hypothetical protein /// status:Confirmed	---	---	---	3.43
177991_at	T11B7.1	hypothetical protein /// status:Confirmed	---	protein binding	---	-2.3
177993_at	F59F5.8	hypothetical protein	---	---	---	1.89
177994_at	F10B5.8	hypothetical protein /// status:Partially_confirmed	embryonic development ending in birth or egg hatching	hydrolase activity	---	-2.4
177997_at	F11F1.6	hypothetical protein /// status:Partially_confirmed	---	---	---	2.69
178017_s_at	F01D5.1	hypothetical protein /// status:Confirmed	---	protein binding	---	-3.81
178025_s_at	W09C5.1	hypothetical protein /// status:Confirmed	reproduction /// hermaphrodite genitalia development	---	intracellular	1.93
178030_at	fbxa-18	F-box A protein /// locus:fbxa-18	---	---	---	-1.82
178032_at	acl-13	ACyLtransferase-like /// locus:acl-13	metabolic process	acyltransferase activity	integral to membrane	3.83
178041_at	F16C3.2	hypothetical protein /// status:Confirmed	---	---	---	1.8
178045_at	F35H8.1	hypothetical protein /// status:Partially_confirmed	---	---	---	6.1
178059_s_at	W03C9.2	hypothetical protein /// status:Partially_confirmed	---	---	---	-1.9
178064_at	T23D8.3	hypothetical protein /// status:Confirmed	nematode larval development /// embryonic development ending in birth or egg hatching /// growth /// positive regulation of growth rate /// hermaphrodite genitalia development	protein binding	---	2.72
178069_s_at	ZC247.1	status:Partially_confirmed /// hypothetical protein	reproduction /// positive regulation of growth rate /// positive regulation of multicellular organism growth	---	---	2.47
178073_s_at	F28H7.6	hypothetical protein /// status:Partially_confirmed	---	---	membrane /// integral to membrane	1.92
178074_at	M04D8.7	hypothetical protein /// status:Partially_confirmed	---	---	integral to membrane	2.07
178078_at	T12D8.9	hypothetical protein	---	---	integral to membrane	2.47
178094_at	F41E7.7	hypothetical protein /// status:Partially_confirmed	---	---	integral to membrane	1.85
178104_at	W06D4.2	hypothetical protein /// status:Confirmed	---	---	integral to membrane	4.1
178140_s_at	R04D3.2	hypothetical protein /// status:Partially_confirmed	---	---	---	-1.96
178142_at	F58D2.2	hypothetical protein /// status:Partially_confirmed	---	---	integral to membrane	1.96
178144_s_at	F56D5.5	hypothetical protein /// status:Partially_confirmed	---	---	---	-1.97
178148_at	fbxa-187	F-box A protein /// locus:fbxa-187	---	---	---	-1.91
178161_s_at	F57G4.7	---	---	---	---	1.95
178167_at	C08B6.6	hypothetical protein /// status:Partially_confirmed	---	---	---	2.56
178177_at	F25H5.2	hypothetical protein /// status:Partially_confirmed	---	---	integral to membrane	1.97
178182_at	F44G4.5	hypothetical protein /// status:Partially_confirmed	---	---	---	2.8
178189_at	F28C6.5	hypothetical protein /// status:Partially_confirmed	gastrulation with mouth forming first /// embryonic development	---	---	-1.84
178198_at	glb-22	GLoBin /// locus:glb-22	oxygen transport	iron ion binding /// oxygen binding /// heme binding	integral to membrane	1.96
178211_at	F08G5.1	hypothetical protein /// status:Confirmed	embryonic development ending in birth or egg hatching	protein binding	---	-1.92
178212_s_at	pqn-59	Prion-like-(Q/N-rich)-domain-bearing protein /// locus:pqn-59	reproduction /// nematode larval development /// embryonic development ending in birth or egg hatching /// growth /// locomotion	protein binding	---	2.71
178214_at	ZC443.2	status:Partially_confirmed /// hypothetical protein	---	---	---	1.85
178218_at	K10D6.3	hypothetical protein /// status:Partially_confirmed	---	---	---	3.08
178236_s_at	lys-4	LYSozyme /// locus:lys-4	carbohydrate metabolic process /// peptidoglycan catabolic process /// cell wall catabolic process	lysozyme activity /// catalytic activity /// cation binding	---	-2.71
178243_s_at	F32B6.4	hypothetical protein /// status:Confirmed	---	---	---	3.6
178290_at	grl-3	GRound-Like (grd related) /// locus:grl-3	---	---	---	-11.58
178294_at	T12D8.4	hypothetical protein /// status:Confirmed	---	---	---	2.05
178295_at	F47H4.2	hypothetical protein	---	---	---	-2.92
178297_at	T24B8.5	hypothetical protein /// status:Confirmed	---	---	---	-4.8
178301_at	T05F1.4	hypothetical protein /// status:Confirmed	---	protein binding	---	-1.88
178302_at	F58B4.5	hypothetical protein /// status:Confirmed	---	---	---	1.95
178316_at	C29F7.2	hypothetical protein /// status:Confirmed	positive regulation of growth rate	---	---	1.88
178322_at	ZK856.5	status:Partially_confirmed /// hypothetical protein	---	hydrolase activity	---	-2.13
178332_s_at	K09E4.4	hypothetical protein /// status:Partially_confirmed	---	---	---	1.92
178335_at	Y41E3.3	status:Confirmed /// hypothetical protein	---	GTPase activity /// GTP binding	integral to membrane	2.53
178345_at	psa-3	Phasmid Socket Absent	---	---	---	2.03
178349_at	F33H2.2	hypothetical protein /// status:Partially_confirmed	morphogenesis of an epithelium /// oviposition /// locomotion	---	---	-2.17
178352_at	R05D7.1	hypothetical protein /// status:Confirmed	---	---	integral to membrane	2.07
178403_at	fbxa-88	F-box A protein /// locus:fbxa-88	---	protein binding	---	-2.32
178410_s_at	R04D3.4	hypothetical protein /// status:Confirmed	---	---	---	-2.56
178414_s_at	dog-1	Deletions Of G-rich DNA /// locus:dog-1	reproduction /// telomere maintenance /// nucleobase, nucleoside, nucleotide and nucleic acid metabolic process /// maintenance of DNA repeat elements	nucleic acid binding /// DNA binding /// ATP-dependent DNA helicase activity /// ATP binding /// ATP-dependent helicase activity /// hydrolase activity, acting on acid anhydrides, in phosphorus-containing anhydrides	nucleus	-1.91
178430_at	C35C5.9	hypothetical protein /// status:Confirmed	---	---	---	2.6
178435_at	C17H1.7	hypothetical protein /// status:Partially_confirmed	---	---	---	-11.22
178438_s_at	rnp-8	RNP (RRM RNA binding domain) containing /// locus:rnp-8	---	nucleotide binding /// nucleic acid binding	---	-1.95
178439_s_at	F17C8.7	hypothetical protein /// hypothetical protein /// hypothetical protein /// status:Partially_confirmed /// status:Confirmed /// status:Confirmed	---	---	---	3.01
178439_s_at	R07E5.15	hypothetical protein /// hypothetical protein /// hypothetical protein /// status:Partially_confirmed /// status:Confirmed /// status:Confirmed	---	---	---	3.01
178439_s_at	T23F11.2	hypothetical protein /// hypothetical protein /// hypothetical protein /// status:Partially_confirmed /// status:Confirmed /// status:Confirmed	---	---	---	3.01
178441_at	C34C6.7	hypothetical protein /// status:Partially_confirmed	---	protein binding	---	2.5
178447_s_at	K08C9.2	hypothetical protein /// status:Confirmed	reproduction	---	---	3.54
178448_at	C03D6.1	hypothetical protein /// status:Partially_confirmed	reproduction /// nematode larval development /// embryonic development ending in birth or egg hatching /// body morphogenesis /// growth /// positive regulation of growth rate /// hermaphrodite genitalia development	---	---	1.84
178452_s_at	fbxa-69	F-box A protein /// locus:fbxa-69	---	---	---	2.64
178479_s_at	let-19	LEThal /// locus:let-19	transcription /// regulation of transcription, DNA-dependent /// multicellular organismal development /// embryonic development ending in birth or egg hatching	---	nucleus	1.85
178494_at	C27D8.3	hypothetical protein	---	---	---	2.65
178497_at	C13G3.1	hypothetical protein /// status:Confirmed	---	---	---	1.88
178507_at	F53F4.4	hypothetical protein /// status:Partially_confirmed	---	---	---	-2.62
178523_at	M02B1.4	hypothetical protein /// status:Partially_confirmed	embryonic development ending in birth or egg hatching	---	integral to membrane	2.26
178535_at	C38D4.4	hypothetical protein /// status:Partially_confirmed	---	---	---	-1.83
178541_at	ZK84.2	status:Confirmed /// hypothetical protein	---	---	integral to membrane	1.96
178549_at	K07A1.3	hypothetical protein /// status:Confirmed	reproduction /// proteolysis	ATP binding /// peptidase activity	integral to membrane	2
178550_at	C33G3.5	hypothetical protein /// status:Partially_confirmed	---	---	---	-1.86
178555_at	F13E9.14	hypothetical protein /// hypothetical protein /// status:Predicted /// status:Predicted	---	---	---	3.16
178555_at	F13E9.8	hypothetical protein /// hypothetical protein /// status:Predicted /// status:Predicted	---	---	---	3.16
178568_s_at	C49F5.6	hypothetical protein /// status:Partially_confirmed	---	---	---	-2.02
178572_at	rsa-1	Regulator of Spindle Assembly	reproduction /// cytokinesis /// nematode larval development /// mitotic spindle organization /// embryonic development ending in birth or egg hatching /// body morphogenesis /// protein localization in organelle /// growth /// locomotion /// hermaphrodite genitalia development /// mitotic spindle stabilization /// cell division	calcium ion binding /// protein binding	---	-2.28
178582_at	C47F8.7	hypothetical protein /// status:Predicted	---	---	---	-2.61
178590_at	T01C3.9	hypothetical protein /// status:Confirmed	---	---	---	-2
178591_at	grl-17	GRound-Like (grd related) /// locus:grl-17	---	---	---	-12.68
178607_s_at	F26A3.1	hypothetical protein /// status:Confirmed	---	---	---	1.96
178612_at	T01G1.2	hypothetical protein /// status:Partially_confirmed	---	---	integral to membrane	1.99
178613_at	F36F2.2	hypothetical protein /// status:Partially_confirmed	---	---	---	2.56
178614_s_at	F36F2.2	hypothetical protein /// status:Partially_confirmed	---	---	---	2.06
178625_s_at	F14H3.6	hypothetical protein /// status:Confirmed	embryonic development ending in birth or egg hatching	---	---	-2.18
178638_at	D2089.2	hypothetical protein /// status:Partially_confirmed	nematode larval development /// embryonic development ending in birth or egg hatching /// positive regulation of growth rate /// locomotion /// positive regulation of locomotion	zinc ion binding	integral to membrane	2.12
178645_at	F54C9.7	hypothetical protein /// status:Partially_confirmed	---	---	integral to membrane	2.08
178648_s_at	F30F8.1	hypothetical protein /// status:Partially_confirmed	---	---	---	-2.4
178667_at	W08E3.4	hypothetical protein /// status:Partially_confirmed	---	---	---	2.15
178691_at	K07A1.4	hypothetical protein /// status:Partially_confirmed	---	---	---	2.93
178703_at	T01C3.5	hypothetical protein /// status:Partially_confirmed	---	---	integral to membrane	2.69
178712_at	F38H4.6	hypothetical protein /// status:Predicted	---	structural molecule activity	---	1.95
178713_at	D1046.5	hypothetical protein /// status:Partially_confirmed	---	---	membrane /// integral to membrane	2.21
178721_at	C25F9.4	hypothetical protein /// status:Partially_confirmed	---	---	---	-1.97
178727_s_at	F54D5.9	hypothetical protein /// status:Partially_confirmed	embryonic development ending in birth or egg hatching	---	---	-2.35
178737_at	K08C7.6	hypothetical protein /// status:Confirmed	---	---	---	1.8
178740_at	T22C1.9	hypothetical protein /// status:Confirmed	---	---	integral to membrane	2.82
178761_at	T02E1.6	hypothetical protein /// status:Partially_confirmed	---	---	integral to membrane	3.77
178772_at	F36F2.1	hypothetical protein	---	---	---	2.08
178774_s_at	T13F3.6	hypothetical protein /// status:Confirmed	---	---	---	-6.02
178775_at	C01G6.3	hypothetical protein /// status:Confirmed	reproduction /// embryonic development ending in birth or egg hatching	---	---	-1.92
178786_s_at	D1081.7	hypothetical protein	---	---	---	-2
178797_at	C49F5.7	hypothetical protein /// status:Confirmed	---	---	---	1.85
178799_at	F14D7.7	hypothetical protein /// status:Partially_confirmed /// status:Predicted	---	---	---	2.29
178818_at	T08G3.4	---	---	---	---	2.81
178820_at	F54D5.4	hypothetical protein /// status:Confirmed	---	---	---	-3.97
178839_s_at	npp-22	Nuclear Pore complex Protein /// locus:npp-22	transport /// embryonic development ending in birth or egg hatching /// protein transport /// mRNA transport /// intracellular protein transmembrane transport	---	nucleus /// nuclear pore /// membrane /// integral to membrane /// nuclear membrane	-1.84
178843_at	F08G5.6	hypothetical protein /// status:Confirmed	defense response	---	---	-5.58
178848_at	str-245	Seven TM Receptor /// locus:str-245	locomotion	---	integral to membrane	-2.88
178852_s_at	D1081.9	hypothetical protein /// status:Partially_confirmed	biosynthetic process	iron ion binding /// protein binding /// zinc ion binding /// oxidoreductase activity	---	-2.27
178873_at	C43F9.4	hypothetical protein /// status:Partially_confirmed	---	---	integral to membrane	-3.94
178889_at	tag-243	Temporarily Assigned Gene name /// locus:tag-243	positive regulation of growth rate	---	---	4.05
178892_at	fbxa-172	F-box A protein /// locus:fbxa-172	---	---	---	-1.88
178893_at	C08F8.4	hypothetical protein /// locus:mboa-4	---	acyltransferase activity /// transferase activity	membrane /// integral to membrane	2.05
178895_at	R06C7.1	hypothetical protein /// status:Confirmed	multicellular organismal development	nucleic acid binding	---	-1.89
178911_at	T28A8.3	hypothetical protein /// status:Partially_confirmed	---	protein binding	---	-2.53
178918_at	T06D8.1	hypothetical protein	---	---	---	8.64
178921_at	ZK856.5	status:Partially_confirmed /// hypothetical protein	---	hydrolase activity	---	1.91
178927_at	K08D8.5	hypothetical protein /// status:Confirmed	---	---	---	-2.68
178928_s_at	F39B2.8	hypothetical protein /// status:Partially_confirmed	G-protein coupled receptor protein signaling pathway	G-protein coupled receptor activity	integral to membrane	1.89
178932_at	C17E4.3	hypothetical protein /// status:Partially_confirmed	embryonic development ending in birth or egg hatching	zinc ion binding	integral to membrane	-1.95
178934_at	nlp-8	Neuropeptide-Like Protein /// locus:nlp-8	---	---	integral to membrane	3.59
178945_s_at	F53B6.4	hypothetical protein /// status:Partially_confirmed	---	structural molecule activity	integral to membrane	2.35
178951_at	C27A7.6	hypothetical protein /// status:Partially_confirmed	---	---	integral to membrane	-2.08
178953_s_at	B0001.2	hypothetical protein /// status:Partially_confirmed	embryonic development ending in birth or egg hatching	---	---	-1.82
178956_at	B0024.15	hypothetical protein /// status:Partially_confirmed	protein amino acid glycosylation /// protein amino acid glycosylation	galactosyltransferase activity /// galactosyltransferase activity /// transferase activity /// transferase activity, transferring glycosyl groups	Golgi apparatus /// membrane /// integral to membrane	2.29
178961_at	T06E6.5	---	---	---	---	-3.23
178963_at	F53B6.7	hypothetical protein /// status:Partially_confirmed	---	---	---	1.82
178979_at	K01C8.2	hypothetical protein /// status:Partially_confirmed	embryonic development ending in birth or egg hatching	---	---	2.4
179012_at	K08E4.7	hypothetical protein /// status:Predicted	proteolysis	metallocarboxypeptidase activity /// protein binding /// zinc ion binding	---	3.81
179013_s_at	T20D3.2	hypothetical protein /// status:Confirmed	---	---	integral to membrane	-2.21
179031_s_at	F53F4.7	hypothetical protein /// status:Partially_confirmed	---	---	integral to membrane	-3.85
179038_at	F26A3.5	hypothetical protein /// status:Partially_confirmed	---	---	---	3.23
179052_s_at	B0001.7	hypothetical protein /// status:Partially_confirmed	hermaphrodite genitalia development	---	---	-1.98
179054_at	C43F9.7	hypothetical protein /// status:Partially_confirmed	---	---	integral to membrane	1.96
179065_s_at	T23B5.1	hypothetical protein	---	---	---	-2.23
179069_at	C08E8.4	hypothetical protein /// status:Partially_confirmed	metabolic process	oxidoreductase activity	---	-6.16
179082_s_at	vps-39	related to yeast Vacuolar Protein Sorting factor	morphogenesis of an epithelium /// cell death /// embryonic development ending in birth or egg hatching	small GTPase regulator activity /// binding /// protein binding	---	-1.81
179098_at	T19C9.8	hypothetical protein /// status:Partially_confirmed	---	---	---	-6.89
179123_at	fbxa-153	F-box A protein /// locus:fbxa-153	---	---	---	-1.84
179127_s_at	C17G1.5	hypothetical protein /// status:Confirmed	---	---	---	2.08
179134_s_at	rmd-3	Regulator of Microtubule Dynamics /// locus:rmd-3	---	---	---	4.01
179146_at	T28A8.4	hypothetical protein /// status:Partially_confirmed	---	---	---	-2.16
179149_at	F47B8.8	hypothetical protein /// status:Confirmed	---	metallopeptidase activity /// zinc ion binding	---	4.73
179171_at	T27F6.8	hypothetical protein /// status:Confirmed	---	---	---	2.68
179196_at	amx-3	AMine oXidase family /// locus:amx-3	metabolic process	catalytic activity /// binding /// electron carrier activity /// oxidoreductase activity	---	-1.88
179197_s_at	fbxa-136	F-box A protein	embryonic development ending in birth or egg hatching	calcium ion binding	---	-2.36
179199_at	T09F5.1	hypothetical protein /// status:Partially_confirmed	protein amino acid glycosylation	galactosyltransferase activity /// transferase activity /// transferase activity, transferring glycosyl groups	Golgi apparatus /// membrane /// integral to membrane	-2.11
179205_at	ZC21.8	status:Partially_confirmed /// hypothetical protein	---	---	integral to membrane	2.65
179207_at	R06C1.6	hypothetical protein /// status:Partially_confirmed	---	---	---	3.39
179219_at	unc-80	UNCoordinated	positive regulation of locomotion /// response to drug	---	---	2.47
179264_at	K06G5.1	hypothetical protein	---	---	---	-2.48
179300_at	T28A8.6	hypothetical protein /// status:Partially_confirmed	---	---	---	-2.38
179301_at	T26F2.3	hypothetical protein /// status:Partially_confirmed	---	---	---	-1.94
179304_at	T24F1.2	hypothetical protein /// status:Partially_confirmed	---	protein binding	integral to membrane	-1.89
179305_at	ZK455.5	status:Partially_confirmed /// hypothetical protein	---	---	integral to membrane	-1.92
179316_at	F58H1.6	hypothetical protein /// status:Partially_confirmed	---	---	integral to membrane	2.05
179323_s_at	C14A6.2	hypothetical protein /// hypothetical protein /// status:Partially_confirmed /// status:Partially_confirmed	transport	transporter activity	integral to membrane	4.15
179323_s_at	M162.5	hypothetical protein /// hypothetical protein /// status:Partially_confirmed /// status:Partially_confirmed	transport	transporter activity	integral to membrane	4.15
179325_at	T10G3.1	hypothetical protein /// status:Confirmed	embryonic development ending in birth or egg hatching	---	---	2.59
179337_at	prom-1	PRogression Of Meiosis /// locus:prom-1	---	---	---	-2.48
179348_at	C15C8.1	hypothetical protein /// status:Partially_confirmed	---	---	integral to membrane	2.02
179380_s_at	C18D4.8	hypothetical protein /// status:Partially_confirmed	---	---	---	1.99
179385_s_at	F14H3.3	hypothetical protein /// status:Confirmed	---	---	---	-2.11
179386_at	ZK971.1	status:Predicted /// hypothetical protein	---	---	integral to membrane	6.56
179392_s_at	T26E3.4	hypothetical protein /// status:Confirmed	positive regulation of growth rate	---	---	2.17
179396_at	C35A5.6	hypothetical protein	---	---	extracellular region	2.36
179398_at	F16H6.7	hypothetical protein /// status:Partially_confirmed	---	---	---	9.15
179404_at	srw-22	Serpentine Receptor, class W /// locus:srw-22	---	---	integral to membrane	-1.86
179415_at	srm-6	Serpentine Receptor, class M	---	---	integral to membrane	-1.81
179453_s_at	C01G10.14	hypothetical protein /// hypothetical protein /// status:Confirmed /// status:Partially_confirmed	embryonic development ending in birth or egg hatching	structural molecule activity	---	2.02
179453_s_at	C25D7.1	hypothetical protein /// hypothetical protein /// status:Confirmed /// status:Partially_confirmed	embryonic development ending in birth or egg hatching	structural molecule activity	---	2.02
179454_at	C49C3.8	hypothetical protein /// status:Confirmed	---	---	---	1.84
179457_at	B0024.4	hypothetical protein /// status:Confirmed	positive regulation of growth rate	---	---	2.09
179482_at	F07A5.2	hypothetical protein /// status:Confirmed	---	---	---	3.11
179485_s_at	sun-1	SUN (S. pombe sad1/Ce-UNC-84) domain protein /// locus:sun-1	protein localization /// embryonic development ending in birth or egg hatching /// body morphogenesis /// positive regulation of growth rate /// centrosome localization	---	nucleus /// membrane /// integral to membrane /// nuclear membrane	-1.85
179498_at	fbxa-157	F-box A protein /// locus:fbxa-157	---	---	---	2.16
179502_at	T28D6.3	hypothetical protein /// status:Confirmed	---	---	---	-7.87
179511_at	F20G2.5	hypothetical protein /// status:Partially_confirmed	defense response	---	---	-3.62
179516_at	mat-2	Metaphase-to-Anaphase Transition defect /// locus:mat-2	reproduction /// mitotic metaphase/anaphase transition /// meiosis /// meiotic metaphase I /// embryonic development ending in birth or egg hatching /// polarity specification of anterior/posterior axis	protein binding	anaphase-promoting complex	-1.81
179531_at	R10E4.7	hypothetical protein /// status:Confirmed	---	catalytic activity	---	2.54
179572_at	C06H5.7	hypothetical protein /// status:Confirmed	---	receptor activity	integral to membrane	2.11
179587_at	F44F4.3	hypothetical protein /// status:Partially_confirmed	---	---	integral to membrane	2.88
179595_at	exos-7	EXOSome (multiexonuclease complex) component /// locus:exos-7	nematode larval development /// RNA processing /// embryonic development ending in birth or egg hatching /// growth /// positive regulation of growth rate	3'-5'-exoribonuclease activity /// RNA binding	---	1.99
179623_s_at	B0035.6	hypothetical protein /// status:Confirmed	---	---	---	-2.02
179647_s_at	W07G1.7	hypothetical protein /// status:Partially_confirmed	---	---	---	-2.4
179649_s_at	C13B4.1	hypothetical protein	histidine catabolic process	dopamine beta-monooxygenase activity	integral to membrane	-1.99
179660_at	C36F7.2	hypothetical protein /// status:Confirmed	---	---	---	-1.88
179671_at	com-1	Completion Of Meiotic recombination (budding yeast Com) related /// locus:com-1	---	---	---	-2.23
179679_at	F52H3.4	hypothetical protein /// status:Partially_confirmed	---	protein binding	---	-2.15
179683_at	C44B9.3	hypothetical protein /// status:Partially_confirmed	---	---	integral to membrane	-1.92
179695_at	F35E12.5	hypothetical protein /// status:Predicted	---	---	---	-3.97
179700_at	cpg-4	Chondroitin ProteoGlycan /// locus:cpg-4	---	---	---	-2.66
179701_s_at	cpg-4	Chondroitin ProteoGlycan /// locus:cpg-4	---	---	---	-1.8
179710_s_at	grl-9	GRound-Like (grd related) /// locus:grl-9	---	---	---	-1.81
179726_at	F57A10.4	hypothetical protein /// status:Confirmed	---	---	integral to membrane	-1.81
179727_at	Y43C5A.3	status:Confirmed /// hypothetical protein	---	---	integral to membrane	3.27
179728_at	fbxa-165	F-box A protein /// locus:fbxa-165	---	---	---	-2.48
179730_at	F19C7.1	hypothetical protein /// status:Confirmed	positive regulation of growth rate	---	---	-2.77
179751_at	T08B6.4	hypothetical protein /// status:Partially_confirmed	---	---	integral to membrane	2.19
179753_at	F42C5.5	hypothetical protein /// status:Partially_confirmed	protein amino acid dephosphorylation	protein tyrosine phosphatase activity	---	3.54
179756_at	bath-19	BTB and MATH domain containing /// locus:bath-19	---	protein binding	---	-2.48
179758_at	K02D7.5	hypothetical protein /// status:Confirmed	---	---	membrane /// integral to membrane	2.63
179783_at	C50D2.3	hypothetical protein /// status:Partially_confirmed	---	protein binding	---	4.06
179786_at	Y51A2B.1	---	---	---	---	-2.08
179788_s_at	T22B3.2	hypothetical protein	---	nucleic acid binding /// hydrogen ion transmembrane transporter activity	proton-transporting two-sector ATPase complex	2.53
179790_at	T24C4.5	hypothetical protein /// status:Partially_confirmed	nematode larval development /// DNA replication, synthesis of RNA primer /// embryonic development ending in birth or egg hatching /// growth	DNA primase activity /// nucleotidyltransferase activity	---	-1.87
179791_s_at	brd-1	BaRD homolog (tumor suppressor gene Bard1) /// locus:brd-1	DNA repair /// response to DNA damage stimulus /// cell death /// meiotic chromosome segregation	protein binding /// zinc ion binding	intracellular	-1.85
179801_at	T24C4.3	hypothetical protein /// status:Partially_confirmed	---	---	---	3.14
179813_at	F17A9.2	hypothetical protein /// status:Confirmed	---	catalytic activity	---	-1.9
179815_at	T23F4.3	hypothetical protein /// status:Partially_confirmed	---	hydrolase activity	---	-2.07
179818_at	C06G3.3	hypothetical protein /// status:Confirmed	---	---	---	3.74
179823_at	tag-151	Temporarily Assigned Gene name /// locus:tag-151	embryonic development ending in birth or egg hatching /// positive regulation of growth rate /// locomotion /// ribosome biogenesis /// ribosome assembly	---	nucleus /// nucleolus	2.43
179826_s_at	F23C8.9	hypothetical protein /// status:Confirmed	DNA replication checkpoint /// response to DNA damage stimulus /// cell cycle /// mitosis /// positive regulation of cell proliferation /// intra-S DNA damage checkpoint /// regulation of S phase /// replication fork protection /// cell division	---	nuclear chromatin /// nucleus /// nucleus /// cytoplasm	-2.11
179831_at	drsh-1	Ortholog of Drosophila DRoSHa gene	cytokinesis /// rRNA processing /// RNA processing /// mitotic spindle organization /// multicellular organismal development /// gonadal mesoderm development /// embryonic development ending in birth or egg hatching /// sexual reproduction /// primary microRNA processing /// ribosome biogenesis	RNA binding /// double-stranded RNA binding /// nuclease activity /// endonuclease activity /// ribonuclease III activity /// ribonuclease III activity /// hydrolase activity	intracellular /// nucleus /// nucleus	-2.42
179837_s_at	cdh-3	CaDHerin family /// locus:cdh-3	cell adhesion /// homophilic cell adhesion /// morphogenesis of embryonic epithelium /// tail tip morphogenesis	calcium ion binding /// protein binding	plasma membrane /// membrane /// integral to membrane /// cell junction	2.12
179840_at	F40F9.10	hypothetical protein /// status:Partially_confirmed	---	---	---	2.07
179844_at	C49C8.3	hypothetical protein /// status:Partially_confirmed	---	---	---	-1.92
179849_s_at	F32D1.3	hypothetical protein /// status:Partially_confirmed	---	binding	integral to membrane	2.1
179870_at	fbxb-21	F-box B protein /// locus:fbxb-21	---	---	---	-1.8
179871_at	fbxa-54	F-box A protein /// locus:fbxa-54	---	---	---	-2.32
179879_at	Y51H4A.5	status:Partially_confirmed /// hypothetical protein	lipid metabolic process	triacylglycerol lipase activity	---	-7.73
179886_at	unc-85	UNCoordinated /// locus:unc-85	chromatin assembly or disassembly /// transcription /// regulation of transcription, DNA-dependent /// post-embryonic development /// embryonic development ending in birth or egg hatching /// chromatin modification /// oviposition /// locomotion	---	nucleus	-2.14
179888_at	C30A5.4	hypothetical protein /// hypothetical protein /// status:Predicted /// Protein phosphatase	---	phosphoprotein phosphatase activity /// hydrolase activity	---	2.61
179888_at	R13A5.11	hypothetical protein /// hypothetical protein /// status:Predicted /// Protein phosphatase	---	phosphoprotein phosphatase activity /// hydrolase activity	---	2.61
179892_at	K06A5.2	hypothetical protein /// status:Confirmed	meiosis /// embryonic development ending in birth or egg hatching	---	integral to membrane	2.94
179893_s_at	K06A5.2	hypothetical protein /// status:Confirmed	meiosis /// embryonic development ending in birth or egg hatching	---	integral to membrane	2.75
179897_s_at	dpf-7	Dipeptidyl Peptidase Four (IV) family	---	---	---	-1.88
179903_at	ZK354.7	status:Partially_confirmed /// hypothetical protein	---	structural molecule activity	---	2.93
179909_at	oac-20	O-ACyltransferase homolog /// locus:oac-20	regulation of transcription, DNA-dependent	transcription factor activity /// transferase activity, transferring acyl groups other than amino-acyl groups /// sequence-specific DNA binding	nucleus /// integral to membrane	-2.56
179912_at	T27A1.2	hypothetical protein /// status:Partially_confirmed	---	---	---	1.81
179919_at	try-9	TRYpsin-like Protease /// locus:try-9	proteolysis	catalytic activity /// serine-type endopeptidase activity /// peptidase activity	---	-2.27
179926_at	math-32	MATH (meprin-associated Traf homology) domain containing /// locus:math-32	---	---	integral to membrane	2.2
179928_s_at	T27C4.1	hypothetical protein /// status:Confirmed	---	---	integral to membrane	2.63
179934_s_at	C27D9.1	hypothetical protein /// status:Partially_confirmed	reproduction /// embryonic development ending in birth or egg hatching /// body morphogenesis	---	---	-2.48
179960_at	C07G1.6	hypothetical protein /// status:Partially_confirmed	---	---	---	1.97
179977_at	Y47D3A.1	status:Partially_confirmed /// hypothetical protein	---	---	---	-1.86
179981_at	K06A5.3	hypothetical protein /// status:Partially_confirmed	---	structural molecule activity	---	4.68
179987_at	Y39E4B.5	status:Partially_confirmed /// hypothetical protein	nematode larval development /// transport /// growth	transporter activity	membrane /// integral to membrane	-2.35
179988_s_at	F42G4.6	hypothetical protein /// status:Partially_confirmed /// status:Predicted /// hypothetical protein	---	---	---	3.52
180002_at	T02G5.1	hypothetical protein /// status:Predicted	---	---	---	2.34
180009_at	F59A6.5	hypothetical protein /// status:Partially_confirmed	intracellular signaling cascade /// embryonic development ending in birth or egg hatching	small GTPase regulator activity /// zinc ion binding /// metal ion binding	---	-2.66
180025_at	T02G5.2	hypothetical protein /// status:Partially_confirmed	---	calcium ion binding	---	2.55
180037_at	W04E12.7	hypothetical protein /// status:Confirmed	---	---	---	5.89
180065_s_at	Y62H9A.5	status:Confirmed /// hypothetical protein	---	---	---	-1.92
180067_at	C18E3.2	hypothetical protein /// status:Confirmed	reproduction /// nematode larval development /// embryonic development ending in birth or egg hatching /// growth /// hermaphrodite genitalia development	---	nucleus	-2.52
180068_s_at	ooc-3	abnormal OOCyte formation	establishment of mitotic spindle orientation /// protein localization /// embryonic development ending in birth or egg hatching /// regulation of small GTPase mediated signal transduction	GTPase activator activity	intracellular /// integral to membrane	-1.84
180073_s_at	F32D1.7	hypothetical protein /// status:Confirmed	embryonic development ending in birth or egg hatching	---	---	-2.09
180080_at	W05F2.7	hypothetical protein /// status:Predicted	---	---	---	1.92
180081_s_at	hpl-2	hypothetical protein /// HP1 Like (heterochromatin protein) /// hypothetical protein /// status:Predicted	reproduction /// reproduction /// nematode larval development /// chromatin assembly or disassembly /// germ cell development /// germ cell development /// gonad development /// gonad development /// positive regulation of growth rate /// positive regulation of growth rate /// negative regulation of vulval development /// negative regulation of vulval development /// regulation of cell differenti…	chromatin binding /// protein binding	chromatin /// nucleus	-2
180083_at	F10G7.5	hypothetical protein	transport /// positive regulation of growth rate	transporter activity	integral to membrane	2.57
180084_s_at	F10G7.5	hypothetical protein	transport /// positive regulation of growth rate	transporter activity	integral to membrane	2.22
180097_at	unc-2	UNCoordinated	regulation of neurotransmitter levels /// DNA methylation /// transport /// ion transport /// calcium ion transport /// locomotory behavior /// response to heat /// negative regulation of transforming growth factor beta receptor signaling pathway /// locomotion /// response to starvation	DNA binding /// ion channel activity /// voltage-gated calcium channel activity /// calcium ion binding /// N-methyltransferase activity	voltage-gated calcium channel complex /// membrane /// integral to membrane	2.22
180099_s_at	Y54E5A.5	status:Confirmed /// hypothetical protein	---	---	---	1.8
180105_at	F32D1.6	hypothetical protein /// status:Partially_confirmed	nematode larval development /// embryonic development ending in birth or egg hatching /// body morphogenesis	---	---	-2.23
180118_at	fbxa-170	F-box A protein /// locus:fbxa-170	---	---	---	-1.84
180128_at	Y51H4A.8	status:Confirmed /// hypothetical protein	---	protein binding	---	1.84
180137_s_at	knl-3	Kinetochore NuLl /// locus:knl-3	cytokinesis /// embryonic development ending in birth or egg hatching /// locomotion /// hermaphrodite genitalia development /// cell division /// kinetochore assembly	---	---	-2.08
180143_at	F14F9.5	hypothetical protein /// status:Confirmed	---	---	extracellular region	2.87
180145_s_at	Y51H4A.7	status:Confirmed /// hypothetical protein	histidine metabolic process /// histidine catabolic process	urocanate hydratase activity /// lyase activity	---	2.07
180151_s_at	C09E7.8	hypothetical protein	---	protein binding /// zinc ion binding	---	-2.3
180159_at	fbxc-7	F-box C protein /// locus:fbxc-7	---	---	---	-1.89
180169_at	C54D2.2	hypothetical protein /// status:Partially_confirmed	---	---	integral to membrane	2.03
180182_at	K03B4.4	hypothetical protein /// status:Partially_confirmed	---	---	---	1.87
180213_at	fbxb-107	F-box B protein /// locus:fbxb-107	---	---	---	-1.87
180223_s_at	T23F4.1	hypothetical protein /// hypothetical protein /// status:Predicted /// status:Partially_confirmed	---	hydrolase activity	---	-4.27
180223_s_at	T23F4.3	hypothetical protein /// hypothetical protein /// status:Predicted /// status:Partially_confirmed	---	hydrolase activity	---	-4.27
180229_s_at	scl-24	SCP-Like extracellular protein /// SCP-Like extracellular protein /// locus:scl-24 /// locus:scl-25	---	---	extracellular region	-2
180229_s_at	scl-25	SCP-Like extracellular protein /// SCP-Like extracellular protein /// locus:scl-24 /// locus:scl-25	---	---	extracellular region	-2
180231_at	C37C3.9	hypothetical protein /// status:Confirmed	---	protein binding	---	-2.03
180256_at	sdz-24	SKN-1 Dependent Zygotic transcript /// locus:sdz-24	nematode larval development /// embryonic development ending in birth or egg hatching /// body morphogenesis /// oviposition /// growth /// locomotion	nucleic acid binding	---	-2.1
180260_at	C04E6.5	hypothetical protein /// status:Partially_confirmed	ubiquitin-dependent protein catabolic process	ubiquitin thiolesterase activity	---	1.84
180263_s_at	C35E7.5	hypothetical protein	---	---	---	-2.04
180264_at	D2092.6	hypothetical protein /// status:Partially_confirmed	---	---	---	2.38
180268_at	C31G12.1	hypothetical protein /// status:Partially_confirmed	---	---	integral to membrane	-2.72
180273_at	Y44A6D.3	status:Confirmed /// hypothetical protein	---	---	---	1.84
180277_at	T22D1.1	hypothetical protein /// status:Predicted	lipid metabolic process /// signal transduction /// intracellular signaling cascade /// embryonic development ending in birth or egg hatching	phosphoinositide phospholipase C activity /// protein binding	---	-2.1
180281_s_at	B0244.9	hypothetical protein /// status:Confirmed	translation	structural constituent of ribosome	intracellular /// ribosome /// integral to membrane	3
180293_at	clec-108	C-type LECtin /// locus:clec-108	---	binding	---	-3.35
180295_s_at	Y63D3A.4	status:Confirmed /// hypothetical protein	---	protein binding	---	-1.8
180296_at	Y26D4A.2	status:Partially_confirmed /// hypothetical protein	---	binding	---	-2.42
180297_at	C06A8.6	hypothetical protein /// status:Confirmed	---	protein binding	extracellular region	4.45
180298_s_at	ent-3	Equilibrative Nucleoside Transporter /// locus:ent-3	transport	nucleoside transmembrane transporter activity	membrane /// integral to membrane	1.91
180303_at	C49C8.2	hypothetical protein /// status:Partially_confirmed	---	---	integral to membrane	5.1
180312_at	F17C11.4	hypothetical protein /// status:Confirmed	---	---	---	2.37
180315_at	F44G3.10	hypothetical protein /// status:Confirmed	---	---	integral to membrane	-4
180317_at	T05E11.2	hypothetical protein	---	---	integral to membrane	1.9
180341_s_at	grl-20	GRound-Like (grd related) /// locus:grl-20	---	---	---	-2.04
180342_at	F35E12.6	hypothetical protein /// status:Confirmed	---	---	---	-2.08
180370_at	far-8	Fatty Acid/Retinol binding protein /// locus:far-8	---	---	---	-2.99
180376_s_at	dao-2	Dauer or Aging adult Overexpression /// locus:dao-2	---	---	---	-2.18
180379_s_at	C17F4.7	hypothetical protein /// status:Confirmed	---	---	---	2.45
180406_at	F59D6.7	hypothetical protein /// status:Partially_confirmed	---	calcium ion binding	---	2.57
180409_at	clec-221	C-type LECtin /// locus:clec-221	---	binding	---	-2.61
180412_at	R05H10.1	hypothetical protein /// status:Confirmed	---	---	---	2.04
180416_at	fbxc-47	F-box C protein /// locus:fbxc-47	---	---	---	-1.88
180423_at	htp-3	Him-Three Paralog /// locus:htp-3	nematode larval development /// mitosis /// embryonic development ending in birth or egg hatching /// growth /// meiotic chromosome segregation	---	---	-1.95
180430_at	C17B7.5	hypothetical protein /// status:Partially_confirmed	transport	transporter activity /// binding	integral to membrane	-2.08
180434_s_at	spe-39	defective SPErmatogenesis	---	---	---	-1.89
180436_s_at	bath-3	BTB and MATH domain containing /// BTB and MATH domain containing /// locus:bath-4 /// locus:bath-3	---	protein binding	---	-2.82
180436_s_at	bath-4	BTB and MATH domain containing /// BTB and MATH domain containing /// locus:bath-4 /// locus:bath-3	---	protein binding	---	-2.82
180442_at	T19D7.5	hypothetical protein /// status:Partially_confirmed	---	---	integral to membrane	2.12
180452_at	clec-228	C-type LECtin /// C-type LECtin /// locus:clec-229 /// locus:clec-228	---	binding	---	-2.44
180452_at	clec-229	C-type LECtin /// C-type LECtin /// locus:clec-229 /// locus:clec-228	---	binding	---	-2.44
180458_at	ZC196.4	status:Partially_confirmed /// hypothetical protein	---	---	---	-1.95
180476_at	K07E1.1	hypothetical protein /// status:Confirmed	methionine salvage	metal ion binding /// dioxygenase activity	---	2.95
180489_at	brp-1	Bypass of Response to Pheromone in yeast	---	protein binding	integral to membrane	1.93
180501_s_at	F44D12.4	hypothetical protein /// status:Confirmed	---	protein binding	---	2.65
180505_at	pqn-32	Prion-like-(Q/N-rich)-domain-bearing protein	---	protein binding	---	-1.85
180513_at	snt-6	SyNapTotagmin /// locus:snt-6	transport	transporter activity	synaptic vesicle /// membrane /// integral to membrane	2.12
180520_at	T28H10.2	hypothetical protein /// status:Confirmed	---	---	---	3.21
180532_s_at	hex-5	HEXosaminidase /// locus:hex-5	carbohydrate metabolic process	catalytic activity /// cation binding	---	1.8
180535_at	flp-5	FMRF-Like Peptide /// locus:flp-5	neuropeptide signaling pathway	---	extracellular region	1.94
180544_s_at	fbxa-182	F-box A protein /// locus:fbxa-182	---	---	---	-4.24
180561_at	W04B5.2	hypothetical protein /// status:Partially_confirmed	---	zinc ion binding	intracellular /// integral to membrane	3.26
180562_at	clec-52	C-type LECtin /// locus:clec-52	---	binding /// sugar binding	---	-3.2
180569_at	B0507.10	hypothetical protein /// status:Partially_confirmed	---	---	---	-1.95
180575_at	C13A2.4	hypothetical protein /// status:Confirmed	---	---	integral to membrane	-14.67
180592_s_at	clec-209	C-type LECtin /// hypothetical protein /// status:Predicted /// locus:clec-209	---	binding	---	-14.51
180594_at	F54C1.8	hypothetical protein /// status:Partially_confirmed	---	---	integral to membrane	3.82
180600_at	ZC132.3	hypothetical protein	---	---	integral to membrane	2.39
180606_at	F40G12.5	hypothetical protein /// status:Partially_confirmed	---	---	---	2.94
180615_at	F49C12.6	hypothetical protein /// status:Confirmed	---	---	integral to membrane	3.11
180616_at	T22B7.3	hypothetical protein /// status:Partially_confirmed	---	hydrolase activity, acting on carbon-nitrogen (but not peptide) bonds, in linear amidines	cytoplasm	-1.83
180618_at	F14D2.7	hypothetical protein /// status:Predicted	ubiquitin-dependent protein catabolic process	ubiquitin thiolesterase activity	integral to membrane	2.04
180626_at	F02E8.4	hypothetical protein /// status:Partially_confirmed	---	---	---	-2.18
180639_at	K10C9.7	hypothetical protein /// status:Partially_confirmed	---	---	---	2.59
180644_at	C42D4.1	hypothetical protein /// status:Confirmed	---	---	---	-1.84
180654_at	eri-1	Enhanced RNAI (RNA interference)	RNA interference /// gene silencing by RNA /// meiotic chromosome segregation /// reproductive process in a multicellular organism	nucleic acid binding /// RNA binding /// nuclease activity /// exonuclease activity /// protein binding /// hydrolase activity	intracellular /// cytoplasm	-2.04
180657_at	str-250	Seven TM Receptor /// locus:str-250	---	---	integral to membrane	3.72
180661_at	W04E12.4	hypothetical protein /// status:Partially_confirmed	---	---	integral to membrane	2.43
180669_s_at	Y4C6B.6	status:Confirmed /// hypothetical protein	carbohydrate metabolic process /// sphingolipid metabolic process /// lysosome organization	catalytic activity /// glucosylceramidase activity /// cation binding	lysosome	-3.89
180679_at	T06E6.10	hypothetical protein /// status:Partially_confirmed	---	protein binding	---	3.09
180715_at	Y48B6A.5	status:Partially_confirmed /// hypothetical protein	---	structural molecule activity	---	2.37
180721_at	ilys-2	Invertebrate LYSozyme /// locus:ilys-2	---	lysozyme activity	---	-5.26
180730_at	F31E8.5	hypothetical protein /// status:Partially_confirmed	---	---	---	2.3
180735_at	T22D1.5	hypothetical protein /// status:Confirmed	embryonic development ending in birth or egg hatching	---	---	-2.06
180749_at	F22F7.4	hypothetical protein /// status:Partially_confirmed	---	---	integral to membrane	1.84
180754_at	C31H1.5	hypothetical protein /// status:Partially_confirmed	phospholipid metabolic process /// lipid catabolic process	phospholipase A2 activity	---	3.45
180758_at	nlp-6	Neuropeptide-Like Protein /// locus:nlp-6	neuropeptide signaling pathway	---	integral to membrane	2
180759_at	F36H9.2	hypothetical protein /// status:Partially_confirmed	---	transmembrane receptor protein serine/threonine kinase activity /// transforming growth factor beta receptor activity	membrane	1.87
180763_at	ZC266.1	status:Partially_confirmed /// hypothetical protein	---	protein binding	integral to membrane	1.87
180765_at	clec-218	C-type LECtin /// hypothetical protein /// locus:clec-218 /// status:Confirmed	---	binding /// sugar binding	---	-2.04
180797_s_at	F11D11.3	hypothetical protein /// hypothetical protein /// status:Partially_confirmed /// status:Predicted	---	---	---	-2.64
180797_s_at	F11D11.4	hypothetical protein /// hypothetical protein /// status:Partially_confirmed /// status:Predicted	---	---	---	-2.64
180806_at	F56C3.8	hypothetical protein /// status:Partially_confirmed	---	---	integral to membrane	-2.49
180815_at	K01H12.1	hypothetical protein /// status:Partially_confirmed	embryonic development ending in birth or egg hatching	zinc ion binding /// metal ion binding	---	2.02
180823_at	Y43F8B.9	status:Partially_confirmed /// hypothetical protein	---	---	---	3.02
180852_at	F30A10.2	hypothetical protein /// status:Confirmed	nematode larval development /// embryonic development ending in birth or egg hatching /// growth	---	---	-2.16
180853_at	K02F2.5	hypothetical protein /// status:Confirmed	---	---	---	1.86
180866_at	fbxa-196	F-box A protein /// locus:fbxa-196	---	protein binding	---	2.64
180875_at	F37E3.3	hypothetical protein /// status:Partially_confirmed	protein amino acid phosphorylation	protein kinase activity /// ATP binding	---	3.16
180894_at	F52D1.2	hypothetical protein /// status:Partially_confirmed	---	---	---	2.08
180905_at	K02E11.5	hypothetical protein /// status:Partially_confirmed	metabolic process	transferase activity, transferring hexosyl groups	---	1.9
180906_s_at	dct-16	DAF-16/FOXO Controlled, germline Tumor affecting /// locus:dct-16	---	---	---	-3.25
180909_at	C32H11.4	hypothetical protein /// status:Confirmed	---	---	---	2.13
180914_at	nlp-35	Neuropeptide-Like Protein /// locus:nlp-35	---	---	integral to membrane	2.13
180916_at	C09D4.2	hypothetical protein /// status:Confirmed	---	---	---	1.97
180920_s_at	ZK1037.6	status:Partially_confirmed /// hypothetical protein	---	---	integral to membrane	-2.38
180936_at	ZC196.5	status:Partially_confirmed /// hypothetical protein	---	---	integral to membrane	-1.91
180939_s_at	C01B7.7	hypothetical protein /// hypothetical protein /// status:Predicted /// status:Predicted	---	---	---	4.06
180939_s_at	F07B7.13	hypothetical protein /// hypothetical protein /// status:Predicted /// status:Predicted	---	---	---	4.06
180940_s_at	C18H7.7	hypothetical protein /// status:Partially_confirmed	---	---	integral to membrane	2.27
180945_s_at	F49C12.7	hypothetical protein	---	---	---	-3.51
180946_at	ilys-3	Invertebrate LYSozyme /// locus:ilys-3	---	lysozyme activity	---	-4.9
180948_at	F52E1.5	hypothetical protein /// status:Partially_confirmed	---	---	---	2.99
180965_at	W04B5.1	hypothetical protein /// status:Confirmed	---	---	---	-1.86
180980_at	F52B11.1	hypothetical protein	---	---	---	-1.91
180985_s_at	F46G10.2	hypothetical protein /// status:Confirmed	---	---	integral to membrane	1.85
180997_at	C34D4.3	hypothetical protein /// status:Confirmed	---	structural molecule activity	---	1.93
181008_at	C15C6.2	hypothetical protein	---	---	---	2.38
181011_at	C35E7.9	hypothetical protein /// status:Partially_confirmed	---	structural molecule activity	---	3.17
181017_at	C16A3.4	hypothetical protein /// status:Confirmed	reproduction /// embryonic development ending in birth or egg hatching /// positive regulation of growth rate	nucleic acid binding /// zinc ion binding /// metal ion binding	intracellular	1.84
181020_at	rod-1	ROD (Drosophila RoughDeal) homolog /// locus:rod-1	embryonic development ending in birth or egg hatching	---	---	-2.23
181041_at	F09F9.3	hypothetical protein /// status:Partially_confirmed	---	---	integral to membrane	-2.73
181056_at	lntl-1	LIN-24 (Twenty-four) Like	---	protein binding	---	2
181058_at	Y9C9A.1	status:Partially_confirmed /// hypothetical protein	vitelline membrane formation	structural constituent of vitelline membrane	---	6.21
181064_at	bath-26	BTB and MATH domain containing /// locus:bath-26	---	protein binding	---	-2.17
181071_at	E02H9.7	hypothetical protein /// status:Confirmed	---	---	---	-2.85
181090_at	T16G12.8	hypothetical protein /// status:Partially_confirmed	---	---	integral to membrane	-2.11
181091_at	Y69E1A.2	status:Confirmed /// hypothetical protein	embryonic development ending in birth or egg hatching	---	---	1.86
181099_at	F54C1.1	hypothetical protein /// status:Partially_confirmed	metabolic process	transferase activity /// transferase activity, transferring glycosyl groups /// transferase activity, transferring hexosyl groups	integral to membrane	2.22
181101_at	F55F8.9	hypothetical protein /// status:Partially_confirmed	embryonic development ending in birth or egg hatching /// metal ion transport	metal ion transmembrane transporter activity	membrane /// integral to membrane	-2.12
181109_at	B0507.2	hypothetical protein /// status:Confirmed	---	---	---	1.9
181115_at	Y69E1A.8	status:Partially_confirmed /// hypothetical protein	---	---	---	2.34
181116_at	F36A2.10	hypothetical protein /// status:Confirmed	---	---	---	1.85
181121_at	C46F2.1	hypothetical protein /// status:Predicted	---	---	---	-1.8
181130_s_at	T16A9.5	hypothetical protein /// status:Confirmed /// status:Confirmed /// hypothetical protein	---	---	integral to membrane	2.7
181139_at	F13G11.2	hypothetical protein /// status:Partially_confirmed	---	---	integral to membrane	2.23
181140_at	T19D2.3	hypothetical protein /// status:Partially_confirmed	---	---	integral to membrane	3.55
181159_s_at	F15E6.9	hypothetical protein /// status:Partially_confirmed	reproduction	---	---	3.92
181192_at	F36A2.11	hypothetical protein /// status:Partially_confirmed	---	---	---	2.32
181195_at	F56H11.2	hypothetical protein	---	---	integral to membrane	1.85
181199_at	C18H7.1	hypothetical protein /// status:Confirmed	---	---	integral to membrane	5.88
181203_at	ZC395.4	status:Partially_confirmed /// hypothetical protein	reproduction	---	---	4.92
181213_s_at	hcp-4	HoloCentric chromosome binding Protein /// locus:hcp-4	reproduction /// mitotic sister chromatid segregation /// cytokinesis /// mitotic spindle organization /// mitotic metaphase plate congression /// embryonic development ending in birth or egg hatching /// cell division /// attachment of spindle microtubules to chromosome /// kinetochore assembly	---	---	-1.9
181217_at	C31H1.8	hypothetical protein /// status:Partially_confirmed	embryonic development ending in birth or egg hatching	---	---	-2.94
181221_s_at	skpt-1	SKP2 (S phase Kinase associated Protein Two) homolog	---	kinase activity	---	-1.87
181231_at	---	status:Confirmed /// status:Partially_confirmed /// hypothetical protein /// hypothetical protein	---	---	integral to membrane	2.29
181234_at	C39B10.3	hypothetical protein /// status:Predicted	---	---	---	4.36
181243_at	C38C3.3	hypothetical protein /// status:Partially_confirmed	---	---	---	2.45
181257_at	F17C11.2	hypothetical protein /// status:Confirmed	---	---	---	1.83
181259_at	clec-51	C-type LECtin /// locus:clec-51	---	binding /// sugar binding	---	-3.02
181270_at	dct-7	DAF-16/FOXO Controlled, germline Tumor affecting /// locus:dct-7	---	---	integral to membrane	-2.11
181288_at	H02I12.5	hypothetical protein /// status:Confirmed	embryonic development ending in birth or egg hatching	protein binding	---	-2.48
181302_s_at	bath-29	BTB and MATH domain containing /// BTB and MATH domain containing /// locus:bath-30	---	protein binding /// protein binding	---	-1.93
181302_s_at	bath-30	BTB and MATH domain containing /// BTB and MATH domain containing /// locus:bath-30	---	protein binding /// protein binding	---	-1.93
181308_s_at	nas-9	Nematode AStacin protease	proteolysis /// embryonic development ending in birth or egg hatching	metalloendopeptidase activity /// peptidase activity /// metallopeptidase activity /// zinc ion binding /// hydrolase activity /// metal ion binding	extracellular region	2.62
181312_at	egg-2	EGG sterile (unfertilizable) /// locus:egg-2	---	---	integral to membrane	-1.81
181325_s_at	C17B7.2	hypothetical protein /// hypothetical protein /// status:Partially_confirmed	---	---	membrane /// integral to membrane	5.03
181325_s_at	T28A11.2	hypothetical protein /// hypothetical protein /// status:Partially_confirmed	---	---	membrane /// integral to membrane	5.03
181331_s_at	K09C6.7	hypothetical protein /// hypothetical protein /// status:Confirmed /// status:Partially_confirmed	---	---	---	2.92
181331_s_at	K09C6.8	hypothetical protein /// hypothetical protein /// status:Confirmed /// status:Partially_confirmed	---	---	---	2.92
181332_at	F55G1.6	hypothetical protein /// status:Confirmed	---	protein binding /// zinc ion binding	integral to membrane	-2.09
181348_at	F26A1.1	hypothetical protein /// status:Confirmed	positive regulation of growth rate	---	---	-2.22
181360_s_at	bath-29	BTB and MATH domain containing /// BTB and MATH domain containing /// locus:bath-30	---	protein binding /// protein binding	---	-2.42
181360_s_at	bath-30	BTB and MATH domain containing /// BTB and MATH domain containing /// locus:bath-30	---	protein binding /// protein binding	---	-2.42
181364_s_at	bath-27	BTB and MATH domain containing /// hypothetical protein /// hypothetical protein /// locus:bath-27 /// status:Partially_confirmed /// status:Predicted	embryonic development ending in birth or egg hatching	protein binding	---	-1.81
181414_at	F41C3.1	hypothetical protein /// status:Partially_confirmed	---	---	---	2.17
181439_at	dsh-2	DiSHevelled related /// locus:dsh-2	reproduction /// morphogenesis of an epithelium /// nematode larval development /// multicellular organismal development /// embryonic development ending in birth or egg hatching /// body morphogenesis /// growth /// positive regulation of growth rate /// locomotion /// hermaphrodite genitalia development	signal transducer activity /// protein binding /// protein binding	intracellular	-2.63
181440_at	D1014.5	hypothetical protein /// status:Confirmed	---	---	integral to membrane	-1.88
181441_s_at	T01D1.3	hypothetical protein /// status:Confirmed	---	---	---	1.94
181450_at	K02F3.9	hypothetical protein /// status:Confirmed	---	---	---	2.29
181453_at	C39E9.12	hypothetical protein /// status:Partially_confirmed	---	nucleic acid binding	---	-1.85
181455_s_at	rpm-1	Regulator of Presynaptic Morphology /// locus:rpm-1	transcription /// regulation of transcription, DNA-dependent /// ubiquitin-dependent protein catabolic process /// body morphogenesis /// oviposition /// regulation of mitotic metaphase/anaphase transition /// regulation of protein stability /// locomotion /// negative regulation of MAPKKK cascade /// regulation of synapse organization /// regulation of synapse organization	protein binding /// zinc ion binding /// hydrolase activity /// ligase activity /// metal ion binding	intracellular /// nucleus /// anaphase-promoting complex	2.33
181460_at	lgc-32	Ligand-Gated ion Channel /// locus:lgc-32	---	---	integral to membrane	-1.82
181467_at	C17B7.4	hypothetical protein /// status:Partially_confirmed	body morphogenesis	---	---	4.66
181475_at	spp-20	SaPosin-like Protein family /// locus:spp-20	lipid metabolic process	---	---	1.82
181494_s_at	T07C4.3	hypothetical protein	---	protein binding	---	-2.46
181497_at	C09B9.2	hypothetical protein /// status:Partially_confirmed	---	---	integral to membrane	2.49
181499_s_at	F26F4.5	hypothetical protein /// status:Confirmed	---	protein binding	---	-1.81
181502_s_at	oac-54	O-ACyltransferase homolog /// Regulator of HYpoxia-inducible factor (hif-1) /// locus:oac-54 /// locus:rhy-1	oviposition	transferase activity, transferring acyl groups other than amino-acyl groups	integral to membrane	1.9
181502_s_at	rhy-1	O-ACyltransferase homolog /// Regulator of HYpoxia-inducible factor (hif-1) /// locus:oac-54 /// locus:rhy-1	oviposition	transferase activity, transferring acyl groups other than amino-acyl groups	integral to membrane	1.9
181531_s_at	F18A11.5	hypothetical protein /// status:Partially_confirmed	ubiquitin-dependent protein catabolic process /// potassium ion transport	voltage-gated potassium channel activity /// protein binding	voltage-gated potassium channel complex /// membrane	2.08
181540_s_at	fncm-1	FANCM (Fanconi anemia complex component M) homolog /// locus:fncm-1	embryonic development ending in birth or egg hatching	---	---	-2.62
181543_at	C43G2.1	hypothetical protein /// status:Partially_confirmed	regulation of transcription, DNA-dependent /// lipid metabolic process /// fatty acid metabolic process /// signal transduction /// hormone-mediated signaling /// fatty acid oxidation	receptor activity /// hormone binding	membrane /// integral to membrane	2.82
181553_at	bath-1	BTB and MATH domain containing /// locus:bath-1	embryonic development ending in birth or egg hatching	protein binding	---	-2.59
181563_at	C13A2.9	hypothetical protein /// status:Partially_confirmed	---	---	integral to membrane	-2.65
181565_at	clec-67	C-type LECtin /// locus:clec-67	---	binding /// sugar binding	---	-3.67
181567_at	F10D11.3	hypothetical protein /// status:Predicted	---	---	---	4.45
181573_at	K05F1.8	hypothetical protein /// status:Partially_confirmed	---	---	integral to membrane	3.12
181580_at	K07B1.7	hypothetical protein	---	nucleic acid binding	intracellular	-1.99
181586_at	F42C5.3	hypothetical protein /// status:Partially_confirmed	positive regulation of growth rate	---	---	-3.59
181607_at	B0273.1	hypothetical protein /// status:Confirmed	---	---	---	2.18
181618_at	ZK418.2	hypothetical protein	---	protein binding	---	3.91
181626_at	ZK546.7	status:Predicted /// hypothetical protein	---	---	---	2.06
181629_at	C31B8.4	hypothetical protein /// status:Partially_confirmed	---	---	---	1.93
181630_at	Y37D8A.5	status:Partially_confirmed /// hypothetical protein	---	---	integral to membrane	1.92
181644_at	T21C9.13	hypothetical protein /// status:Confirmed	---	---	integral to membrane	-1.9
181654_at	K12H6.4	hypothetical protein /// status:Confirmed	---	---	---	-17.32
181667_s_at	F58A6.5	hypothetical protein /// status:Confirmed	---	---	integral to membrane	2.01
181670_at	fbxa-38	F-box A protein /// locus:fbxa-38	---	---	---	1.87
181671_s_at	F56C9.7	hypothetical protein /// status:Confirmed	positive regulation of growth rate	---	---	-2.81
181681_at	spp-13	SaPosin-like Protein family /// locus:spp-13	---	---	integral to membrane	-1.98
181694_at	F48D6.4	hypothetical protein	---	---	---	-2.13
181695_at	C49G7.12	hypothetical protein /// status:Confirmed	---	---	---	-1.82
181708_s_at	ani-2	ANIllin (actin binding protein) /// locus:ani-2	reproduction /// multicellular organismal development /// gonad development /// embryonic development ending in birth or egg hatching /// body morphogenesis /// cell differentiation /// multicellular organism reproduction /// negative regulation of multicellular organism growth /// oogenesis /// oogenesis	---	---	-1.9
181709_at	sdz-3	SKN-1 Dependent Zygotic transcript /// locus:sdz-3	---	---	---	2.02
181711_at	ZK546.4	status:Partially_confirmed /// hypothetical protein	---	---	integral to membrane	2.15
181736_s_at	K05F1.9	hypothetical protein /// status:Confirmed	---	structural molecule activity	---	3.28
181763_at	K04G2.10	hypothetical protein /// status:Partially_confirmed	---	protein binding	integral to membrane	-2.04
181764_at	Y51B9A.7	status:Predicted /// hypothetical protein	---	---	integral to membrane	2.24
181767_at	Y48C3A.5	hypothetical protein	---	---	integral to membrane	2.41
181768_s_at	F29C4.6	hypothetical protein /// status:Confirmed	tRNA processing	ATP binding	---	2.18
181769_s_at	B0261.7	hypothetical protein /// status:Partially_confirmed	---	---	---	-1.99
181779_at	C53D5.2	hypothetical protein /// status:Partially_confirmed	---	zinc ion binding	integral to membrane	1.8
181785_at	ZC308.4	hypothetical protein	---	---	---	-1.82
181791_at	T06A1.5	hypothetical protein /// status:Partially_confirmed	---	---	integral to membrane	2.13
181802_at	ttr-56	TransThyretin-Related family domain /// locus:ttr-56	---	---	integral to membrane	1.84
181805_at	Y48C3A.3	status:Partially_confirmed /// hypothetical protein	---	---	---	2.7
181812_at	Y54G9A.5	status:Partially_confirmed /// hypothetical protein	embryonic development ending in birth or egg hatching /// negative regulation of multicellular organism growth	---	integral to membrane	-1.83
181822_at	D1022.2	hypothetical protein /// status:Partially_confirmed	---	---	integral to membrane	-3
181842_at	F56A3.2	hypothetical protein /// status:Partially_confirmed	nematode larval development /// DNA repair /// embryonic development ending in birth or egg hatching /// growth	nuclease activity /// protein binding /// zinc ion binding	intracellular	-2.13
181843_s_at	K10D2.1	hypothetical protein	transcription /// regulation of transcription, DNA-dependent /// embryonic development ending in birth or egg hatching /// chromatin modification /// positive regulation of growth rate /// regulation of transcription	transcription regulator activity	nucleus	-1.88
181854_at	W07G9.2	hypothetical protein /// locus:glct-6	---	galactosylgalactosylxylosylprotein 3-beta-glucuronosyltransferase activity	membrane	4
181860_s_at	ZC328.5	status:Partially_confirmed /// hypothetical protein	---	---	---	-3.1
181866_at	ZC581.3	status:Partially_confirmed /// hypothetical protein	---	---	integral to membrane	4.65
181867_s_at	W03F8.4	hypothetical protein /// status:Confirmed	---	---	---	-1.81
181869_at	C34B2.4	hypothetical protein /// status:Partially_confirmed	meiotic chromosome segregation	zinc ion binding	---	3.05
181874_at	W03F8.6	hypothetical protein	---	---	integral to membrane	2.39
181895_s_at	T06D10.2	hypothetical protein /// status:Partially_confirmed	embryonic development ending in birth or egg hatching	---	---	-2.05
181912_at	F58H10.1	hypothetical protein /// status:Confirmed	---	---	---	1.89
181925_at	Y9C2UA.1	hypothetical protein	---	---	integral to membrane	2.21
181929_at	F09C6.10	hypothetical protein /// status:Confirmed	embryonic development ending in birth or egg hatching	---	---	-1.88
181930_at	ZK355.3	status:Partially_confirmed /// hypothetical protein	---	---	---	-2.17
181932_at	ZK1053.4	status:Partially_confirmed /// hypothetical protein	---	---	---	-2.04
181933_at	T27A3.5	hypothetical protein /// status:Partially_confirmed	protein amino acid dephosphorylation /// dephosphorylation	protein tyrosine phosphatase activity /// phosphatase activity	---	3.52
181935_s_at	ril-2	RNAi-Induced Longevity	reproduction /// nematode larval development /// embryonic development ending in birth or egg hatching /// growth /// positive regulation of growth rate	---	---	1.87
181958_at	T06D4.1	hypothetical protein	---	---	---	-2.48
181967_at	flp-24	FMRF-Like Peptide /// locus:flp-24	neuropeptide signaling pathway /// embryonic development ending in birth or egg hatching	---	extracellular region /// integral to membrane	2.06
181984_at	brc-1	BRCa homolog (tumor suppressor gene Brca1) /// hypothetical protein /// status:Predicted	double-strand break repair via homologous recombination /// DNA repair /// DNA repair /// apoptosis /// response to DNA damage stimulus /// cell death /// positive regulation of growth rate /// meiotic chromosome segregation /// meiotic chromosome separation	DNA binding /// protein binding /// zinc ion binding	intracellular /// nucleus	-1.81
181987_at	T23B3.6	hypothetical protein /// status:Confirmed	---	---	integral to membrane	3.26
181990_at	F22G12.7	hypothetical protein /// status:Predicted	---	---	---	-3.16
181993_at	T10E9.6	hypothetical protein /// status:Partially_confirmed	embryonic development ending in birth or egg hatching	---	integral to membrane	2.05
182001_at	Y51B9A.5	status:Partially_confirmed /// hypothetical protein	---	---	---	2.5
182003_at	C42D8.1	hypothetical protein /// status:Confirmed	---	---	integral to membrane	1.85
182019_at	W03D2.9	hypothetical protein /// status:Partially_confirmed	---	---	---	2.14
182035_at	B0261.6	hypothetical protein	---	---	---	1.89
182067_at	rmd-5	Regulator of Microtubule Dynamics /// locus:rmd-5	---	---	---	1.99
182081_s_at	E01A2.10	hypothetical protein /// hypothetical protein /// status:Partially_confirmed /// status:Confirmed	---	arylesterase activity	integral to membrane	-1.97
182081_s_at	K05F6.11	hypothetical protein /// hypothetical protein /// status:Partially_confirmed /// status:Confirmed	---	arylesterase activity	integral to membrane	-1.97
182082_at	C49A1.10	hypothetical protein /// status:Partially_confirmed	---	---	integral to membrane	3
182087_at	C17F3.1	hypothetical protein /// status:Partially_confirmed	---	---	integral to membrane	1.84
182088_s_at	F57F4.4	hypothetical protein /// status:Partially_confirmed	positive regulation of growth rate	---	---	-22.81
182106_at	C34H4.1	hypothetical protein /// status:Partially_confirmed	---	---	integral to membrane	-3.12
182108_at	C16D9.1	hypothetical protein /// status:Confirmed	---	---	---	1.87
182127_at	F15A8.4	hypothetical protein /// status:Predicted	---	---	integral to membrane	1.81
182135_at	spp-22	SaPosin-like Protein family /// status:Partially_confirmed /// locus:spp-22 /// hypothetical protein	transport	transporter activity	outer membrane-bounded periplasmic space	3.34
182156_at	F55A4.3	hypothetical protein /// status:Partially_confirmed	---	---	integral to membrane	2.22
182169_at	F47G6.2	hypothetical protein /// locus:acs-16	metabolic process	catalytic activity	---	4.11
182188_s_at	ZC155.4	status:Partially_confirmed /// hypothetical protein	glycerol metabolic process /// lipid metabolic process /// positive regulation of growth rate	phosphoric diester hydrolase activity /// glycerophosphodiester phosphodiesterase activity	integral to membrane	-2.03
182193_at	ZK484.5	status:Confirmed /// hypothetical protein	---	---	integral to membrane	2.5
182200_at	C05C12.5	hypothetical protein /// status:Confirmed	---	---	---	2.62
182209_s_at	T05E7.5	hypothetical protein /// status:Partially_confirmed	---	---	---	-2.12
182211_s_at	C01G8.1	hypothetical protein	---	---	---	-1.89
182227_s_at	vab-8	Variable ABnormal morphology	neuron migration /// microtubule-based movement /// multicellular organismal development /// nervous system development /// axon guidance /// mesodermal cell migration /// cell migration /// oviposition /// cell differentiation /// regulation of cell migration /// tail morphogenesis /// locomotion /// vulval development	nucleotide binding /// motor activity /// microtubule motor activity /// ATP binding	cytoplasm /// microtubule /// microtubule associated complex	1.98
182249_at	C47D2.1	hypothetical protein /// status:Partially_confirmed	---	---	---	2.54
182257_at	lam-3	LAMinin related. See also lmb- /// locus:lam-3	nematode larval development /// cell adhesion /// embryonic development ending in birth or egg hatching /// body morphogenesis /// regulation of cell adhesion /// regulation of cell migration /// growth /// positive regulation of growth rate /// locomotion /// positive regulation of multicellular organism growth /// regulation of embryonic development	receptor binding	proteinaceous extracellular matrix /// basement membrane /// laminin-1 complex /// extracellular matrix	-2.17
182284_s_at	F55A11.7	hypothetical protein /// status:Confirmed	---	---	integral to membrane	-2.34
182289_s_at	F18E9.7	hypothetical protein /// status:Partially_confirmed	---	---	---	-1.81
182310_at	K02B12.2	hypothetical protein /// status:Partially_confirmed	---	---	---	-2.02
182312_at	gak-1	Germline-enhanced AT-HooK protein /// locus:xnd-1	reproduction	DNA binding /// protein binding	nucleus	-2.08
182317_at	C36C9.1	hypothetical protein /// status:Partially_confirmed	---	protein binding	---	-2.26
182318_s_at	gei-12	hypothetical protein /// GEX Interacting protein /// locus:gei-12 /// status:Partially_confirmed	embryonic development ending in birth or egg hatching	protein binding	---	-2.47
182319_s_at	T21G5.4	hypothetical protein /// status:Confirmed	reproduction /// nematode larval development /// embryonic development ending in birth or egg hatching /// growth /// hermaphrodite genitalia development	protein binding	---	2.28
182328_at	F35A5.1	hypothetical protein /// status:Partially_confirmed	---	---	---	1.85
182336_at	C54D10.5	hypothetical protein /// status:Partially_confirmed	---	---	integral to membrane	1.84
182338_at	T05E7.1	hypothetical protein /// status:Partially_confirmed	lipid metabolic process /// acyl-CoA metabolic process	palmitoyl-CoA hydrolase activity /// thiolester hydrolase activity	---	-2.73
182339_at	K09H9.8	hypothetical protein /// status:Confirmed	---	---	integral to membrane	1.99
182348_at	fbxa-12	F-box A protein /// locus:fbxa-12	---	---	---	-2.47
182353_at	ist-1	Insulin receptor SubsTrate homolog /// locus:ist-1	positive regulation of growth rate	receptor activity	---	2.05
182355_at	K08D9.2	hypothetical protein /// status:Partially_confirmed	---	---	integral to membrane	-1.83
182357_at	nlp-26	Neuropeptide-Like Protein /// locus:nlp-26	---	---	---	4.76
182363_at	C43G2.3	hypothetical protein /// status:Partially_confirmed	---	---	---	2.53
182378_s_at	Y43F8C.5	status:Confirmed /// hypothetical protein	---	---	---	1.85
182384_at	ins-31	INSulin related /// locus:ins-31	---	hormone activity	extracellular region	-3.05
182391_at	C54D10.4	hypothetical protein /// status:Partially_confirmed	---	---	integral to membrane	1.98
182395_at	grl-23	GRound-Like (grd related) /// locus:grl-23	---	---	integral to membrane	-3.67
182410_at	T10E9.4	hypothetical protein /// status:Partially_confirmed	---	---	integral to membrane	2.6
182420_at	F14F11.2	hypothetical protein /// status:Confirmed	reproduction /// embryonic development ending in birth or egg hatching /// positive regulation of growth rate /// locomotion	---	integral to membrane	2.99
182421_at	him-10	High Incidence of Males (increased X chromosome loss) /// locus:him-10	reproduction /// mitotic sister chromatid segregation /// cytokinesis /// nematode larval development /// cell cycle /// mitotic spindle organization /// mitosis /// meiosis /// attachment of spindle microtubules to kinetochore /// embryonic development ending in birth or egg hatching /// growth /// positive regulation of growth rate /// locomotion /// meiotic chromosome segregation /// cell divi…	protein binding	chromosome, centromeric region /// condensed chromosome kinetochore /// nucleus	-1.84
182429_s_at	egg-4	EGG sterile (unfertilizable) /// EGG sterile (unfertilizable) /// locus:egg-5 /// locus:egg-4	reproduction /// nematode larval development /// protein amino acid dephosphorylation /// embryonic development ending in birth or egg hatching /// dephosphorylation /// growth	protein tyrosine phosphatase activity /// phosphatase activity	---	-2.41
182429_s_at	egg-5	EGG sterile (unfertilizable) /// EGG sterile (unfertilizable) /// locus:egg-5 /// locus:egg-4	reproduction /// nematode larval development /// protein amino acid dephosphorylation /// embryonic development ending in birth or egg hatching /// dephosphorylation /// growth	protein tyrosine phosphatase activity /// phosphatase activity	---	-2.41
182440_s_at	chtl-1	CHoline Transporter-Like	reproduction /// morphogenesis of an epithelium /// nematode larval development /// collagen and cuticulin-based cuticle development /// growth /// hermaphrodite genitalia development	---	integral to membrane	-1.95
182444_at	F18G5.6	hypothetical protein /// status:Confirmed	---	---	---	2.55
182446_at	sas-5	Spindle ASsembly abnormal /// locus:sas-5	cell cycle /// multicellular organismal development /// embryonic development ending in birth or egg hatching	protein binding	cytoplasm	-2.15
182479_at	B0454.5	hypothetical protein /// status:Confirmed	---	---	integral to membrane	-2
182485_at	C39B5.2	hypothetical protein /// status:Partially_confirmed	embryonic development ending in birth or egg hatching	---	---	-1.94
182487_s_at	pho-1	intestinal acid PHOsphatase /// locus:pho-1	nematode larval development /// embryonic development ending in birth or egg hatching /// growth	acid phosphatase activity	integral to membrane	-1.81
182492_at	math-14	MATH (meprin-associated Traf homology) domain containing /// locus:math-14	---	protein binding	---	-6.85
182501_at	C46A5.5	hypothetical protein /// status:Partially_confirmed	embryonic development ending in birth or egg hatching /// hermaphrodite genitalia development	---	---	-2.28
182503_s_at	C06A5.6	hypothetical protein /// status:Partially_confirmed	---	---	---	-2.56
182506_at	F58G11.4	hypothetical protein /// status:Partially_confirmed	---	---	integral to membrane	1.95
182507_at	F38E9.6	hypothetical protein /// status:Predicted	---	---	---	2.5
182511_at	srx-26	Serpentine Receptor, class X /// locus:srx-26	---	receptor activity /// electron carrier activity	integral to membrane	-2.24
182515_at	F13B9.2	hypothetical protein /// status:Partially_confirmed	---	---	---	-1.88
182518_s_at	C14C11.1	hypothetical protein /// hypothetical protein /// status:Partially_confirmed /// status:Partially_confirmed /// status:Confirmed /// hypothetical protein	---	---	---	2.35
182518_s_at	C18G1.9	hypothetical protein /// hypothetical protein /// status:Partially_confirmed /// status:Partially_confirmed /// status:Confirmed /// hypothetical protein	---	---	---	2.35
182520_s_at	R09E10.6	hypothetical protein /// status:Confirmed	reproduction	---	---	2.71
182533_at	fbxa-197	F-box A protein /// locus:fbxa-197	---	---	---	-1.86
182534_at	Y17D7B.2	status:Partially_confirmed /// hypothetical protein	---	---	---	-2.86
182545_at	clec-223	C-type LECtin /// locus:clec-223	---	binding	---	-2.11
182548_s_at	F58G11.3	hypothetical protein	---	---	---	-2.45
182579_at	fbxa-164	F-box A protein /// locus:fbxa-164	translation	structural constituent of ribosome	intracellular /// ribosome	-1.85
182600_at	F02D10.6	hypothetical protein /// status:Partially_confirmed	embryonic development ending in birth or egg hatching	---	integral to membrane	-1.87
182621_at	F35B12.3	hypothetical protein /// status:Confirmed	---	---	---	2.06
182628_s_at	T21F4.1	hypothetical protein /// status:Confirmed	arginine metabolic process	arginase activity /// hydrolase activity /// hydrolase activity, acting on carbon-nitrogen (but not peptide) bonds, in linear amidines /// metal ion binding	---	2.12
182634_at	F56C9.11	hypothetical protein /// status:Confirmed	positive regulation of growth rate	protein binding	---	-2.08
182636_at	K07B1.4	hypothetical protein	---	transferase activity, transferring acyl groups other than amino-acyl groups	integral to membrane	-2.13
182654_at	dct-3	DAF-16/FOXO Controlled, germline Tumor affecting /// locus:dct-3	---	---	---	-5.26
182663_at	F57F4.1	hypothetical protein /// status:Partially_confirmed	---	---	---	3.11
182667_at	srr-6	Serpentine Receptor, class R /// locus:srr-6	---	receptor activity	integral to membrane	-2.02
182691_s_at	C36A4.5	hypothetical protein /// hypothetical protein /// claustrin like	---	---	integral to membrane	-2.23
182691_s_at	F25D7.4	hypothetical protein /// hypothetical protein /// claustrin like	---	---	integral to membrane	-2.23
182698_at	C09B9.1	hypothetical protein /// status:Partially_confirmed	---	---	integral to membrane	2.21
182717_at	F56B3.6	hypothetical protein /// status:Partially_confirmed	---	---	integral to membrane	2.54
182733_at	oac-6	O-ACyltransferase homolog /// locus:oac-6	---	transferase activity, transferring acyl groups other than amino-acyl groups	integral to membrane	-3.49
182760_at	D2024.2	hypothetical protein /// status:Confirmed	GPI anchor metabolic process /// intracellular protein transport	hydrolase activity, acting on ester bonds	intrinsic to endoplasmic reticulum membrane	2.77
182765_at	ZK994.6	status:Partially_confirmed /// hypothetical protein	---	---	---	1.82
182782_at	H12D21.7	hypothetical protein /// status:Confirmed	transport /// sulfate transport	thiosulfate sulfurtransferase activity /// transporter activity /// lipid binding	---	-2
182834_s_at	C36A4.4	hypothetical protein /// hypothetical protein /// status:Confirmed /// status:Predicted	reproduction /// metabolic process /// embryonic development ending in birth or egg hatching /// positive regulation of growth rate	UDP-N-acetylglucosamine diphosphorylase activity /// transferase activity /// nucleotidyltransferase activity	cytoplasm	-1.85
182834_s_at	K06B9.2	hypothetical protein /// hypothetical protein /// status:Confirmed /// status:Predicted	reproduction /// metabolic process /// embryonic development ending in birth or egg hatching /// positive regulation of growth rate	UDP-N-acetylglucosamine diphosphorylase activity /// transferase activity /// nucleotidyltransferase activity	cytoplasm	-1.85
182836_at	C29G2.6	hypothetical protein /// status:Confirmed	---	---	membrane /// integral to membrane	1.92
182839_at	Y11D7A.3	hypothetical protein	---	---	integral to membrane	-2.67
182848_at	tag-319	Temporarily Assigned Gene name /// locus:tag-319	reproduction /// embryonic development ending in birth or egg hatching	protein binding	---	-2.02
182852_at	F57F4.2	hypothetical protein /// status:Partially_confirmed	---	---	integral to membrane	-3.12
182869_at	F07H5.10	hypothetical protein /// status:Partially_confirmed	---	---	---	-1.93
182881_at	clec-222	C-type LECtin /// locus:clec-222	embryonic development ending in birth or egg hatching	binding	---	-2.83
182893_at	F55B11.5	hypothetical protein /// status:Predicted	---	---	---	-2.62
182901_at	F20A1.8	hypothetical protein /// status:Partially_confirmed	---	---	---	-3.94
182907_s_at	ZK328.4	status:Partially_confirmed /// hypothetical protein	---	---	---	-1.96
182910_at	Y15E3A.4	status:Confirmed /// hypothetical protein	transport	transporter activity	integral to membrane	3.47
182921_at	C01G5.3	hypothetical protein /// status:Partially_confirmed	---	---	---	2.36
182928_s_at	C36A4.4	hypothetical protein /// status:Confirmed /// status:Predicted	reproduction /// metabolic process /// embryonic development ending in birth or egg hatching /// positive regulation of growth rate	UDP-N-acetylglucosamine diphosphorylase activity /// transferase activity /// nucleotidyltransferase activity	cytoplasm	-1.93
182935_at	F36A4.3	hypothetical protein /// status:Partially_confirmed	---	---	---	2.87
182954_s_at	T07A9.9	hypothetical protein	reproduction /// nematode larval development /// embryonic development ending in birth or egg hatching /// growth /// positive regulation of growth rate /// locomotion /// ribosome biogenesis	nucleotide binding /// GTP binding	nucleus	2.49
182963_at	F23D12.1	hypothetical protein /// status:Confirmed	---	---	integral to membrane	-9.78
182967_at	nlp-7	Neuropeptide-Like Protein /// locus:nlp-7	neuropeptide signaling pathway	---	integral to membrane	2.35
182970_at	F55G11.4	hypothetical protein /// status:Confirmed	---	---	---	-6.94
182974_at	T01C8.3	hypothetical protein /// status:Partially_confirmed	---	---	---	-3.6
183000_at	set-31	SET (trithorax/polycomb) domain containing /// locus:set-31	chromatin assembly or disassembly	chromatin binding	chromatin /// nucleus	-2.26
183001_s_at	F55D12.2	hypothetical protein /// status:Partially_confirmed	---	---	---	1.93
183002_at	grl-19	GRound-Like (grd related) /// locus:grl-19	---	---	---	-8.39
183009_at	Y38F1A.8	status:Confirmed /// hypothetical protein	---	---	integral to membrane	1.86
183018_at	F16B4.7	hypothetical protein /// status:Partially_confirmed	---	---	---	5.82
183024_at	R02F2.4	hypothetical protein /// status:Confirmed	chitin metabolic process	chitin binding	extracellular region	-2.13
183028_s_at	lys-2	LYSozyme /// locus:lys-2	carbohydrate metabolic process	catalytic activity /// protein binding /// cation binding	---	-2.55
183052_at	C32H11.1	hypothetical protein /// status:Partially_confirmed	---	---	---	-1.96
183063_at	F54H5.5	hypothetical protein /// status:Partially_confirmed	---	lipid binding	---	1.99
183064_at	F17H10.2	hypothetical protein	---	---	integral to membrane	2.38
183068_at	fbxb-83	F-box B protein /// locus:fbxb-83	---	---	---	-2.26
183074_at	W06D11.3	hypothetical protein /// status:Partially_confirmed	embryonic development ending in birth or egg hatching	---	---	-2.33
183078_at	W08F4.5	hypothetical protein /// status:Predicted	---	---	---	2.76
183111_at	pqn-48	Prion-like-(Q/N-rich)-domain-bearing protein /// locus:pqn-48	---	---	---	3.81
183115_at	C34H4.2	hypothetical protein /// status:Confirmed	---	---	---	-1.84
183130_at	C11D2.3	hypothetical protein /// status:Partially_confirmed	---	---	---	4.79
183132_at	T07D1.3	hypothetical protein /// status:Predicted	metabolic process	oxidoreductase activity	integral to membrane	1.91
183142_at	B0348.2	hypothetical protein /// status:Partially_confirmed	---	---	integral to membrane	-3.33
183148_at	F20D6.1	hypothetical protein /// status:Partially_confirmed	---	---	---	2.68
183155_at	D2096.1	hypothetical protein /// status:Predicted	protein transport	protein transporter activity	mitochondrial inner membrane	-2.93
183166_at	C16A3.6	hypothetical protein /// status:Confirmed	reproduction /// nematode larval development /// embryonic development ending in birth or egg hatching /// growth /// positive regulation of growth rate /// hermaphrodite genitalia development	---	---	2.52
183169_s_at	F07B7.8	hypothetical protein /// hypothetical protein /// status:Predicted /// status:Predicted	---	---	---	-3.48
183169_s_at	K06C4.1	hypothetical protein /// hypothetical protein /// status:Predicted /// status:Predicted	---	---	---	-3.48
183173_at	R09H10.2	hypothetical protein /// status:Partially_confirmed	---	---	integral to membrane	-1.91
183178_at	T22E5.1	hypothetical protein	---	---	integral to membrane	2.69
183181_at	F28F9.3	hypothetical protein /// status:Confirmed	---	---	integral to membrane	2.08
183194_s_at	F08F3.6	hypothetical protein /// status:Confirmed	---	---	---	-2.03
183200_at	F25E5.4	hypothetical protein /// status:Partially_confirmed	nematode larval development /// proteolysis /// body morphogenesis	catalytic activity /// serine-type endopeptidase activity	---	1.81
183211_s_at	C04F12.7	hypothetical protein /// status:Confirmed	---	---	integral to membrane	3.82
183216_at	Y51B9A.8	status:Predicted /// hypothetical protein	---	---	---	-2.35
183240_s_at	H37A05.1	hypothetical protein /// locus:lpin-1	nematode larval development /// embryonic development ending in birth or egg hatching /// growth /// locomotion	---	---	1.88
183248_at	R05A10.4	hypothetical protein /// status:Partially_confirmed	---	---	extracellular region	2.62
183274_at	F28C6.10	hypothetical protein /// status:Confirmed	---	---	---	-2.71
183275_at	F02C9.4	hypothetical protein /// status:Partially_confirmed	---	---	membrane /// integral to membrane	2.11
183291_at	F56C9.3	hypothetical protein /// status:Confirmed	cation transport	cation transmembrane transporter activity	membrane /// integral to membrane	-3
183294_at	F58F9.3	hypothetical protein	---	---	---	-1.92
183314_at	C29F5.1	hypothetical protein /// status:Confirmed	---	---	---	1.83
183315_s_at	F08F8.7	hypothetical protein /// status:Confirmed	carbohydrate metabolic process /// metabolic process	catalytic activity /// ribulose-phosphate 3-epimerase activity	---	2.13
183328_at	Y38F1A.1	status:Confirmed /// hypothetical protein	---	---	---	1.96
183333_at	klp-10	Kinesin-Like Protein	cytokinesis /// microtubule-based movement /// embryonic development ending in birth or egg hatching /// meiotic chromosome segregation /// cell division	nucleotide binding /// microtubule motor activity /// ATP binding	microtubule associated complex	-2.51
183335_at	Y39B6A.29	status:Partially_confirmed /// hypothetical protein	---	---	integral to membrane	2.23
183341_at	T23G11.1	hypothetical protein /// status:Confirmed	---	---	integral to membrane	2.97
183355_s_at	gtl-1	Gon-Two Like (TRP subfamily) /// locus:gtl-1	reproduction /// nematode larval development /// ion transport /// defecation /// growth /// positive regulation of growth rate	ion channel activity	membrane /// integral to membrane	2.24
183364_at	Y39B6A.13	status:Confirmed /// hypothetical protein	embryonic development ending in birth or egg hatching	---	---	-1.97
183367_at	M02D8.5	hypothetical protein /// status:Partially_confirmed	---	---	---	-2.14
183378_at	F55G11.8	hypothetical protein /// status:Confirmed	---	---	---	-2.97
183388_at	F23B12.4	hypothetical protein	body morphogenesis	---	---	2.22
183394_at	T26A8.3	hypothetical protein /// status:Partially_confirmed	---	---	---	-2.36
183431_s_at	Y39B6A.34	status:Confirmed /// hypothetical protein	---	---	---	1.93
183450_at	clec-1	C-type LECtin /// locus:clec-1	morphogenesis of an epithelium /// nematode larval development /// body morphogenesis /// growth /// locomotion /// positive regulation of multicellular organism growth /// hermaphrodite genitalia development	binding	---	-2.54
183455_at	F26B1.1	hypothetical protein /// status:Partially_confirmed	---	---	integral to membrane	3.56
183457_s_at	Y39B6A.10	status:Confirmed /// hypothetical protein	---	---	integral to membrane	-1.98
183463_at	Y39B6A.33	status:Partially_confirmed /// hypothetical protein	reproduction /// nematode larval development /// growth /// positive regulation of growth rate	---	---	3.11
183467_at	C50F4.12	hypothetical protein /// status:Partially_confirmed	---	---	---	-1.85
183493_at	B0432.3	hypothetical protein /// status:Confirmed	reproduction /// nematode larval development /// translation /// embryonic development ending in birth or egg hatching /// growth /// positive regulation of growth rate	structural constituent of ribosome	mitochondrion /// mitochondrial large ribosomal subunit /// ribosome /// ribonucleoprotein complex /// ribonucleoprotein complex	1.87
183526_at	C14C6.5	hypothetical protein /// status:Confirmed	---	---	---	-2.74
183527_s_at	C14C6.5	hypothetical protein /// status:Confirmed	---	---	---	-3.02
183537_at	C03G6.6	hypothetical protein /// status:Partially_confirmed	---	---	integral to membrane	-5.21
183559_s_at	C27A7.6	hypothetical protein /// status:Partially_confirmed /// hypothetical protein /// hypothetical protein	transport	transporter activity	integral to membrane	-2.33
183563_at	F31D5.2	hypothetical protein /// status:Partially_confirmed	---	---	integral to membrane	-2.97
183566_at	C14C6.2	hypothetical protein /// status:Confirmed	---	---	---	-3.58
183567_s_at	C14C6.2	hypothetical protein /// status:Confirmed	---	---	---	-3.86
183581_at	F48C1.5	hypothetical protein /// status:Partially_confirmed	---	---	---	-1.85
183590_at	C50E3.6	hypothetical protein /// status:Confirmed	---	---	---	2.06
183603_at	F23B12.4	hypothetical protein	body morphogenesis	---	---	1.81
183618_at	C24B5.1	hypothetical protein /// status:Partially_confirmed	G-protein coupled receptor protein signaling pathway	---	integral to membrane	1.99
183630_at	C29F9.3	hypothetical protein	---	---	---	-2.19
183635_s_at	C01G5.8	hypothetical protein /// status:Partially_confirmed	---	protein binding	---	-1.85
183654_at	fbxa-183	F-box A protein /// locus:fbxa-183	---	---	---	3.2
183658_at	C50F7.3	hypothetical protein /// status:Partially_confirmed	---	---	---	1.96
183700_s_at	F35E8.10	hypothetical protein /// hypothetical protein /// status:Partially_confirmed /// status:Partially_confirmed	---	---	---	1.81
183700_s_at	F35E8.13	hypothetical protein /// hypothetical protein /// status:Partially_confirmed /// status:Partially_confirmed	---	---	---	1.81
183705_at	K10D11.4	hypothetical protein /// status:Predicted	---	---	---	-1.85
183714_at	F42G9.4	hypothetical protein /// status:Partially_confirmed	---	---	integral to membrane	3.36
183734_at	F27C1.1	hypothetical protein /// status:Confirmed	---	---	---	3.28
183736_at	fbxa-125	F-box A protein /// locus:fbxa-125	---	---	---	2.42
183741_s_at	Y73F4A.1	status:Confirmed /// hypothetical protein	histidine catabolic process	dopamine beta-monooxygenase activity	extracellular region	-1.9
183742_at	F40H6.1	hypothetical protein /// status:Confirmed	---	---	integral to membrane	4.18
183771_at	nrf-5	Nose Resistant to Fluoxetine /// locus:nrf-5	nematode larval development /// embryonic development ending in birth or egg hatching /// growth	lipid binding	---	2.1
183774_s_at	K12H6.9	hypothetical protein /// status:Partially_confirmed	---	---	---	-14.37
183781_at	C47E12.9	hypothetical protein /// status:Partially_confirmed	---	---	---	2.99
183784_at	ulp-5	Ubiquitin-Like Protease /// locus:ulp-5	proteolysis	peptidase activity /// cysteine-type peptidase activity	---	-2.14
183786_at	tbc-18	TBC (Tre-2/Bub2/Cdc16) domain family /// locus:tbc-18	regulation of Rab GTPase activity	Rab GTPase activator activity	intracellular	1.87
183796_s_at	K01D12.2	status:Partially_confirmed /// hypothetical protein	---	---	---	-2.14
183818_s_at	C05E7.1	hypothetical protein /// status:Partially_confirmed	---	---	integral to membrane	2.57
183821_at	F10E7.2	hypothetical protein /// status:Partially_confirmed	embryonic development ending in birth or egg hatching	zinc ion binding	intracellular /// integral to membrane	-1.84
183847_at	C15F1.1	hypothetical protein /// status:Partially_confirmed	---	---	---	2.16
183848_at	dod-23	Downstream Of DAF-16 (regulated by DAF-16) /// locus:dod-23	determination of adult life span	---	---	-2.53
183851_at	D2062.7	hypothetical protein /// status:Confirmed	---	---	integral to membrane	2.04
183852_s_at	Y48E1B.5	status:Partially_confirmed /// hypothetical protein	nematode larval development /// embryonic development ending in birth or egg hatching /// growth /// positive regulation of growth rate /// hermaphrodite genitalia development	---	---	2.02
183893_s_at	C08F1.6	hypothetical protein /// status:Confirmed	---	---	integral to membrane	-2.03
183895_at	nlp-25	Neuropeptide-Like Protein /// locus:nlp-25	---	protein binding	---	3.61
183921_at	F26F4.2	hypothetical protein /// status:Partially_confirmed	---	protein binding	---	1.99
183930_at	C17C3.9	hypothetical protein /// status:Partially_confirmed	---	---	---	3.25
183935_at	fbxc-28	F-box C protein /// locus:fbxc-28	---	---	---	-1.82
183951_at	C33H5.7	hypothetical protein /// locus:swd-2.2	nematode larval development /// determination of adult life span /// embryonic development ending in birth or egg hatching /// growth /// hermaphrodite genitalia development	---	---	-1.9
183963_at	C29F9.2	hypothetical protein /// status:Confirmed	---	---	---	-3.29
183970_at	T04C12.3	hypothetical protein /// status:Confirmed	---	---	---	2.39
183973_at	F17E9.2	hypothetical protein /// status:Partially_confirmed	---	---	---	-3.72
184015_at	R05F9.9	hypothetical protein /// status:Confirmed	---	---	---	-1.91
184017_at	F13H8.3	hypothetical protein /// status:Partially_confirmed	---	---	---	-7.5
184031_at	F36A4.2	hypothetical protein /// status:Confirmed	---	---	---	3.36
184033_s_at	math-47	MATH (meprin-associated Traf homology) domain containing	---	---	---	1.95
184035_at	clec-265	C-type LECtin /// locus:clec-265	---	binding	---	-2.05
184048_s_at	ZK1225.5	status:Partially_confirmed /// hypothetical protein	---	---	---	1.92
184075_s_at	ify-1	Interactor of FizzY protein /// locus:ify-1	reproduction /// embryonic development ending in birth or egg hatching /// hermaphrodite genitalia development	protein binding	---	-1.98
184093_at	M01H9.1	hypothetical protein /// status:Partially_confirmed	cell redox homeostasis	---	---	2.29
184095_at	F17E9.5	hypothetical protein /// status:Partially_confirmed	---	protein binding	integral to membrane	2.15
184098_s_at	Y73F4A.2	status:Confirmed /// hypothetical protein	histidine catabolic process /// embryonic development ending in birth or egg hatching /// carbohydrate catabolic process	catalytic activity /// dopamine beta-monooxygenase activity /// carbohydrate binding	extracellular region	2.24
184103_s_at	F07B7.2	hypothetical protein /// hypothetical protein /// status:Predicted /// status:Predicted	---	protein binding	---	-2.22
184103_s_at	W09B7.2	hypothetical protein /// hypothetical protein /// status:Predicted /// status:Predicted	---	protein binding	---	-2.22
184108_s_at	ZK1225.4	status:Partially_confirmed /// hypothetical protein	---	---	---	2.26
184114_at	F25E5.7	hypothetical protein /// status:Partially_confirmed	proteolysis	catalytic activity /// serine-type endopeptidase activity	---	-3.11
184130_at	F20D6.2	hypothetical protein /// status:Predicted	---	---	---	-2.96
184134_at	F49E8.1	hypothetical protein /// status:Confirmed	---	---	---	-2.39
184166_at	F43C9.1	hypothetical protein /// status:Confirmed	---	---	---	-2.03
184170_at	F47B8.10	hypothetical protein /// status:Confirmed	transport /// response to oxidative stress /// positive regulation of growth rate	peroxidase activity /// transporter activity /// heme binding	integral to membrane	8.16
184173_at	C54F6.6	hypothetical protein /// status:Confirmed	---	---	integral to membrane	2.14
184175_at	F58E10.7	hypothetical protein /// status:Confirmed	---	---	---	3.03
184185_at	C49C3.11	hypothetical protein /// status:Partially_confirmed	reproduction /// transport	hormone activity /// binding	extracellular region /// extracellular space /// integral to membrane	-1.83
184186_at	W05F2.4	hypothetical protein	nematode larval development /// growth /// positive regulation of multicellular organism growth /// hermaphrodite genitalia development	---	---	1.89
184202_at	C35D10.2	hypothetical protein /// status:Confirmed	---	protein binding /// protein binding	---	2.32
184207_at	Y17G7B.11	status:Partially_confirmed /// hypothetical protein	---	protein binding	---	-2.4
184223_at	R02F11.2	hypothetical protein /// status:Confirmed	---	---	---	3.78
184227_at	Y47D3A.28	status:Partially_confirmed /// hypothetical protein	---	---	---	-1.96
184240_at	F53F10.1	hypothetical protein /// status:Confirmed	---	---	---	4.98
184248_at	cey-2	Y-box /// locus:cey-2	regulation of transcription, DNA-dependent	nucleic acid binding /// DNA binding /// protein binding	---	-1.92
184252_at	sgo-1	(S. pombe chromosome segregation protein) homolog /// locus:sgo-1	nematode larval development /// cell cycle /// chromosome segregation /// embryonic development ending in birth or egg hatching /// growth /// meiotic chromosome segregation /// cell division	---	chromosome, centromeric region /// nucleus	-1.95
184260_s_at	C15B12.4	hypothetical protein /// status:Partially_confirmed	---	---	---	2.17
184261_at	C16C8.14	hypothetical protein /// status:Confirmed	protein modification process /// embryonic development ending in birth or egg hatching	---	---	-1.99
184266_at	sta-1	STAT transcription factor family	transcription /// regulation of transcription, DNA-dependent /// signal transduction /// multicellular organismal development /// dauer larval development /// dauer larval development /// regulation of transcription	DNA binding /// transcription factor activity /// signal transducer activity /// calcium ion binding /// protein binding /// protein binding /// identical protein binding	nucleus /// cytoplasm	2.2
184280_at	C16C8.18	hypothetical protein /// status:Partially_confirmed	---	---	---	2.45
184295_at	Y37H2A.11	status:Partially_confirmed /// hypothetical protein	---	---	integral to membrane	-2.5
184302_s_at	Y73F8A.12	status:Partially_confirmed /// status:Partially_confirmed /// hypothetical protein /// hypothetical protein	---	---	---	3.29
184306_at	Y51H4A.15	hypothetical protein	nematode larval development /// embryonic development ending in birth or egg hatching /// growth /// positive regulation of growth rate /// positive regulation of locomotion	---	---	1.97
184315_at	C13F10.1	hypothetical protein	---	---	integral to membrane	1.93
184319_at	cpn-4	CalPoNin /// locus:cpn-4	---	---	---	1.93
184336_s_at	flh-1	FLYWCH zinc finger transcription factor homolog	embryonic development ending in birth or egg hatching /// body morphogenesis	---	---	-2.04
184340_at	fbxb-22	F-box B protein /// locus:fbxb-22	---	---	---	-1.82
184343_at	F55C12.6	hypothetical protein /// status:Predicted	---	---	---	-2.58
184344_s_at	Y57G7A.6	status:Partially_confirmed /// hypothetical protein	---	---	integral to membrane	2.08
184387_at	H32C10.1	hypothetical protein /// status:Partially_confirmed	metabolic process /// hermaphrodite genitalia development	hydrolase activity	---	2.78
184398_s_at	W06A11.4	hypothetical protein /// status:Partially_confirmed /// status:Partially_confirmed /// hypothetical protein	---	---	---	-1.97
184410_at	C35D10.5	hypothetical protein /// status:Partially_confirmed	embryonic development ending in birth or egg hatching /// positive regulation of growth rate	---	---	-2.09
184411_at	C12D12.1	hypothetical protein	---	---	---	-2.08
184431_at	C18A11.3	hypothetical protein /// status:Partially_confirmed	---	---	integral to membrane	-3.2
184432_at	Y59A8B.12	status:Partially_confirmed /// hypothetical protein	---	---	---	-1.81
184434_at	Y60A3A.16	status:Partially_confirmed /// hypothetical protein	protein amino acid phosphorylation	protein serine/threonine kinase activity /// ATP binding	---	-2.11
184437_at	C46H11.6	hypothetical protein /// status:Partially_confirmed	locomotion /// hermaphrodite genitalia development	protein binding	---	2.22
184438_at	T20D4.11	hypothetical protein /// status:Partially_confirmed	---	---	---	6.58
184452_at	F56F11.1	hypothetical protein /// status:Partially_confirmed	---	---	---	1.86
184456_at	lips-14	LIPaSe related /// locus:lips-14	---	---	---	-1.91
184457_at	btb-14	BTB (Broad/complex/Tramtrack/Bric a brac) domain protein /// locus:btb-14	---	protein binding	extracellular region	2.04
184492_s_at	B0379.2	hypothetical protein /// status:Partially_confirmed	---	---	integral to membrane	4.12
184497_at	lys-8	LYSozyme /// locus:lys-8	carbohydrate metabolic process	catalytic activity /// protein binding /// cation binding	---	-2.52
184500_s_at	C23H5.8	hypothetical protein	---	protein binding	---	-7.35
184507_at	C34F11.2	hypothetical protein /// status:Confirmed	---	---	---	2.64
184518_s_at	C17B7.3	hypothetical protein /// hypothetical protein /// status:Predicted /// status:Confirmed	---	---	integral to membrane	1.96
184518_s_at	T28A11.3	hypothetical protein /// hypothetical protein /// status:Predicted /// status:Confirmed	---	---	integral to membrane	1.96
184520_at	M01E11.3	hypothetical protein /// status:Partially_confirmed	embryonic development ending in birth or egg hatching	---	---	-2.59
184530_at	W10G11.1	hypothetical protein /// status:Partially_confirmed	---	---	---	5.58
184531_s_at	W10G11.1	hypothetical protein /// status:Partially_confirmed	---	---	---	3.64
184534_s_at	C17H12.8	hypothetical protein /// status:Confirmed	---	---	---	-1.89
184541_s_at	ssu-2	Suppressor of Stomatin mutant Uncoordination /// locus:ssu-2	---	---	---	3.07
184549_at	K05F6.10	hypothetical protein /// status:Predicted	---	---	---	3.53
184558_at	nlp-17	Neuropeptide-Like Protein /// locus:nlp-17	body morphogenesis	---	---	2.49
184561_at	F07G11.4	hypothetical protein /// status:Partially_confirmed	---	---	---	-10.7
184568_at	Y48G10A.2	status:Partially_confirmed /// hypothetical protein	---	protein binding	---	-2.2
184585_at	Y46G5A.23	status:Partially_confirmed /// hypothetical protein	---	---	---	-3.01
184587_s_at	spl-1	Sphingosine Phosphate Lyase /// locus:spl-1	carboxylic acid metabolic process /// positive regulation of growth rate	catalytic activity /// sphinganine-1-phosphate aldolase activity /// lyase activity /// carboxy-lyase activity /// pyridoxal phosphate binding	endoplasmic reticulum /// endoplasmic reticulum membrane /// membrane /// integral to membrane	-1.96
184597_at	clec-177	C-type LECtin /// locus:clec-177	---	binding	---	-1.88
184599_at	C01B10.6	hypothetical protein	---	---	---	-2.68
184600_s_at	C01B10.6	hypothetical protein	---	---	---	-2.28
184601_at	dnj-26	DNaJ domain (prokaryotic heat shock protein) /// locus:dnj-26	protein folding	heat shock protein binding /// unfolded protein binding	integral to membrane	-2.06
184602_at	ugt-25	UDP-GlucuronosylTransferase /// locus:ugt-25	metabolic process	transferase activity /// transferase activity, transferring glycosyl groups /// transferase activity, transferring hexosyl groups	integral to membrane	-3
184609_at	inx-21	INneXin /// locus:inx-21	embryonic development ending in birth or egg hatching	---	gap junction /// integral to membrane	-1.85
184612_s_at	wapl-1	WAPL (Drosophila Wings APart-Like cohesin interactor)	embryonic development ending in birth or egg hatching /// oviposition /// positive regulation of growth rate /// locomotion	binding	---	-2.26
184617_at	F20D6.10	hypothetical protein /// status:Partially_confirmed	---	---	integral to membrane	2.12
184619_at	clec-137	C-type LECtin /// locus:clec-137	---	binding	---	-12.03
184623_at	K01A2.10	hypothetical protein /// status:Partially_confirmed	---	protein binding	---	2.44
184624_s_at	C25H3.10	hypothetical protein	---	---	---	2.77
184634_s_at	C17B7.4	hypothetical protein /// hypothetical protein /// status:Partially_confirmed /// status:Predicted	body morphogenesis	---	---	17.34
184634_s_at	T28A11.5	hypothetical protein /// hypothetical protein /// status:Partially_confirmed /// status:Predicted	body morphogenesis	---	---	17.34
184656_at	T19D12.3	hypothetical protein /// status:Predicted	---	---	---	2.5
184674_at	scl-12	SCP-Like extracellular protein /// locus:scl-12	---	---	extracellular region	-3.9
184676_s_at	wrt-10	locus:wrt-10 /// WaRThog (hedgehog-like family)	locomotion /// positive regulation of multicellular organism growth	---	---	-2.12
184685_s_at	C48E7.7	hypothetical protein /// hypothetical protein /// status:Confirmed /// status:Confirmed	---	---	---	2.83
184685_s_at	T08B2.12	hypothetical protein /// hypothetical protein /// status:Confirmed /// status:Confirmed	---	---	---	2.83
184691_at	Y39A3B.3	status:Predicted /// hypothetical protein	---	---	integral to membrane	-3.41
184702_at	inx-22	INneXin /// locus:inx-22	embryonic development ending in birth or egg hatching	---	gap junction /// integral to membrane	-2.17
184708_s_at	C43E11.5	hypothetical protein /// hypothetical protein /// status:Partially_confirmed /// status:Partially_confirmed	protein amino acid dephosphorylation	protein tyrosine phosphatase activity /// protein binding	---	2.93
184708_s_at	C50F2.5	hypothetical protein /// hypothetical protein /// status:Partially_confirmed /// status:Partially_confirmed	protein amino acid dephosphorylation	protein tyrosine phosphatase activity /// protein binding	---	2.93
184740_at	C33F10.1	hypothetical protein /// status:Confirmed	---	---	integral to membrane	3.27
184744_at	F28E10.2	hypothetical protein /// status:Predicted	---	---	integral to membrane	2.08
184773_s_at	Y66H1B.3	status:Partially_confirmed /// hypothetical protein	reproduction /// embryonic development ending in birth or egg hatching /// body morphogenesis	---	---	1.9
184776_at	fog-2	Feminization Of Germline	spermatogenesis /// negative regulation of translation /// hermaphrodite germ-line sex determination /// masculinization of hermaphroditic germ-line	translation repressor activity	---	-1.81
184794_s_at	F40G12.11	hypothetical protein /// status:Partially_confirmed	---	---	---	-2.24
184796_s_at	exc-9	EXCretory canal abnormal /// locus:exc-9	morphogenesis of a polarized epithelium /// tail morphogenesis /// tail tip morphogenesis	zinc ion binding	---	2.24
184829_at	F07G11.1	hypothetical protein /// status:Partially_confirmed	---	---	integral to membrane	-20.27
184840_at	Y46G5A.20	status:Confirmed /// hypothetical protein	---	protein binding	---	-2.27
184846_at	B0205.10	hypothetical protein /// status:Confirmed	---	---	integral to membrane	1.97
184862_at	F16H11.3	hypothetical protein /// status:Confirmed	transport	nucleoside transmembrane transporter activity	membrane /// integral to membrane	-1.98
184868_at	F12A10.1	hypothetical protein /// status:Confirmed	---	---	integral to membrane	-2.28
184876_at	math-41	MATH (meprin-associated Traf homology) domain containing /// locus:math-41	---	protein binding	---	1.9
184883_s_at	F49C12.15	hypothetical protein /// status:Partially_confirmed	---	---	---	2.23
184884_s_at	C01B10.9	hypothetical protein /// status:Partially_confirmed	metabolic process	catalytic activity	integral to membrane	-1.99
184943_s_at	nos-2	NanOS related /// hypothetical protein /// locus:nos-2 /// status:Partially_confirmed	germ cell development /// embryonic development ending in birth or egg hatching /// oogenesis /// regulation of cell cycle	RNA binding /// zinc ion binding	---	-1.92
184960_at	C33F10.4	hypothetical protein /// status:Confirmed	---	---	---	-1.8
184994_s_at	Y56A3A.18	status:Confirmed /// hypothetical protein	reproduction /// nematode larval development /// embryonic development ending in birth or egg hatching /// growth /// positive regulation of growth rate	zinc ion binding /// metal ion binding	intracellular	3.25
185023_at	Y56A3A.33	status:Partially_confirmed /// hypothetical protein	---	nucleic acid binding /// exonuclease activity	intracellular	3.69
185024_s_at	Y56A3A.33	status:Partially_confirmed /// hypothetical protein	---	nucleic acid binding /// exonuclease activity	intracellular	3.4
185030_at	fbxa-83	F-box A protein /// locus:fbxa-83	---	---	---	-1.97
185047_at	F39H12.3	hypothetical protein /// status:Confirmed	signal transduction	cAMP-dependent protein kinase regulator activity	---	1.96
185054_at	Y71H2B.1	status:Confirmed /// hypothetical protein	---	acyl-CoA binding /// binding	---	2.16
185060_s_at	Y116A8A.2	status:Predicted /// status:Predicted /// hypothetical protein /// hypothetical protein	---	structural molecule activity	---	1.89
185071_at	F26D11.2	hypothetical protein /// status:Partially_confirmed	---	---	---	-2.25
185078_at	rga-3	Rho GTPase Activating protein /// locus:rga-3	reproduction /// cytokinesis /// signal transduction /// embryonic development ending in birth or egg hatching /// cortical actin cytoskeleton organization /// regulation of actin filament-based process /// regulation of actin filament-based process /// asymmetric protein localization during cell fate commitment /// cell division	Rho GTPase activator activity	intracellular	-1.87
185086_at	clec-79	C-type LECtin /// locus:clec-79	cell adhesion	binding /// hyaluronic acid binding	integral to membrane	2.96
185087_s_at	clec-73	C-type LECtin /// C-type LECtin /// locus:clec-79 /// locus:clec-73	cell adhesion	binding /// protein binding /// sugar binding /// hyaluronic acid binding	integral to membrane	2.13
185087_s_at	clec-79	C-type LECtin /// C-type LECtin /// locus:clec-79 /// locus:clec-73	cell adhesion	binding /// protein binding /// sugar binding /// hyaluronic acid binding	integral to membrane	2.13
185088_at	F11G11.4	hypothetical protein /// status:Partially_confirmed	---	---	integral to membrane	1.82
185094_at	gmn-1	GeMiNin homolog /// locus:gmn-1	reproduction	---	---	-1.94
185101_at	T28A11.6	hypothetical protein /// status:Partially_confirmed	---	---	integral to membrane	10.27
185135_at	ZC239.15	status:Partially_confirmed /// hypothetical protein	potassium ion transport	voltage-gated potassium channel activity /// protein binding /// protein binding	voltage-gated potassium channel complex /// membrane	1.85
185138_s_at	ZC239.17	status:Confirmed /// hypothetical protein	potassium ion transport	voltage-gated potassium channel activity /// protein binding	voltage-gated potassium channel complex /// membrane /// integral to membrane	1.92
185151_s_at	C16A11.2	hypothetical protein	---	---	---	-1.87
185154_at	Y39C12A.1	status:Partially_confirmed /// hypothetical protein	nematode larval development /// growth /// locomotion	---	---	1.92
185158_s_at	C33C12.4	hypothetical protein /// status:Partially_confirmed	embryonic development ending in birth or egg hatching	---	integral to membrane	3.35
185163_s_at	M01G12.14	hypothetical protein /// status:Partially_confirmed	---	---	---	2.43
185173_at	F41E6.12	hypothetical protein /// status:Confirmed	---	---	---	-2.8
185185_at	F59E11.7	hypothetical protein	---	---	integral to membrane	2.23
185190_at	F33D11.2	hypothetical protein /// status:Predicted	---	---	---	1.98
185193_at	Y50E8A.12	status:Partially_confirmed /// hypothetical protein	---	---	---	1.91
185203_s_at	Y53C12B.2	status:Confirmed /// hypothetical protein	reproduction /// embryonic development ending in birth or egg hatching /// hermaphrodite genitalia development	RNA binding	nucleus /// nucleolus	1.98
185216_at	ZK1290.1	status:Partially_confirmed /// hypothetical protein	---	---	---	-1.82
185218_at	clec-136	C-type LECtin /// locus:clec-136	---	---	---	-1.91
185243_at	B0336.11	hypothetical protein	---	structural molecule activity /// calcium ion binding	integral to membrane	1.92
185244_at	srg-34	Serpentine Receptor, class G (gamma) /// locus:srg-34	signal transduction /// sensory perception of chemical stimulus	transmembrane receptor activity	membrane /// integral to membrane	2.39
185252_at	rnh-1.1	RNase H /// locus:rnh-1.1	---	nucleic acid binding /// ribonuclease H activity	---	2.5
185270_at	F53E10.4	hypothetical protein /// status:Confirmed	---	---	---	-2.1
185275_at	cdr-5	CaDmium Responsive /// locus:cdr-5	---	---	integral to membrane	2.42
185297_at	B0207.10	hypothetical protein /// status:Partially_confirmed	---	---	integral to membrane	2.13
185298_s_at	ZK1193.2	status:Partially_confirmed /// hypothetical protein	---	binding	---	-1.88
185302_s_at	Y106G6H.6	status:Confirmed /// hypothetical protein	reproduction /// embryonic development ending in birth or egg hatching	binding	---	-2.15
185309_at	clec-92	C-type LECtin /// locus:clec-92	---	binding	integral to membrane	-1.88
185314_s_at	Y52B11A.8	status:Confirmed /// hypothetical protein	phospholipid metabolic process /// lipid catabolic process	phospholipase A2 activity	extracellular region	-1.83
185325_at	T02G5.12	hypothetical protein /// status:Partially_confirmed	transport	transporter activity	integral to membrane	-2.18
185387_s_at	Y53C10A.5	status:Confirmed /// hypothetical protein	post-translational protein modification /// regulation of protein metabolic process	small conjugating protein ligase activity	integral to membrane	1.87
185393_s_at	nlp-21	Neuropeptide-Like Protein	---	---	---	2.4
185399_at	Y75B8A.28	status:Partially_confirmed /// hypothetical protein	---	---	---	-1.93
185413_at	Y75B12B.3	status:Partially_confirmed /// hypothetical protein	---	---	---	3.14
185415_at	nlp-47	Neuropeptide-Like Protein /// locus:nlp-47	neuropeptide signaling pathway	---	---	3.33
185420_at	C24D10.2	hypothetical protein /// status:Confirmed	---	---	integral to membrane	4.01
185434_at	fbxa-158	F-box A protein	positive regulation of growth rate	---	---	-2.76
185445_s_at	C27A12.6	hypothetical protein /// status:Partially_confirmed	---	zinc ion binding	---	-1.88
185451_at	F35D11.3	hypothetical protein /// status:Partially_confirmed	---	---	membrane /// integral to membrane	2.17
185458_s_at	F19B10.2	hypothetical protein /// status:Confirmed	---	---	---	-1.94
185464_at	F08D12.7	hypothetical protein /// status:Partially_confirmed	---	---	---	2.22
185466_at	F59E12.1	hypothetical protein /// status:Confirmed	---	---	---	-1.91
185467_at	ctn-1	alpha-CaTuliN (catenin/vinculin related)	cell adhesion	structural molecule activity /// protein binding /// cadherin binding	actin cytoskeleton /// integral to membrane	1.88
185470_at	mop-25.3	MO25 (MOuse embryo scaffolding Protein) homolog /// locus:mop-25.3	embryonic development ending in birth or egg hatching	binding	---	-2.11
185483_at	C16A11.4	hypothetical protein	locomotion	protein binding /// zinc ion binding	---	-2.02
185484_at	bath-7	BTB and MATH domain containing /// locus:bath-7	---	protein binding	---	-2.06
185494_at	F42A10.6	hypothetical protein /// status:Confirmed	---	---	---	-2.2
185502_at	Y75B12B.1	status:Confirmed /// hypothetical protein	---	---	---	-1.96
185534_at	clec-138	C-type LECtin /// locus:clec-138	---	---	---	-3.15
185554_s_at	Y39B6A.1	status:Confirmed /// hypothetical protein	---	protein binding	---	-1.88
185557_s_at	lys-7	LYSozyme /// locus:lys-7	carbohydrate metabolic process /// determination of adult life span	catalytic activity /// cation binding	---	-3.05
185560_at	Y43F8B.11	status:Partially_confirmed /// hypothetical protein	---	---	---	2.33
185562_s_at	tim-1	TIMeless (Drosophila/mammal) related /// locus:tim-1	nematode larval development /// regulation of sister chromatid cohesion /// regulation of sister chromatid cohesion /// mitotic sister chromatid cohesion /// mitotic sister chromatid cohesion /// embryonic development ending in birth or egg hatching /// growth /// meiotic sister chromatid cohesion	---	---	-2.27
185573_at	spp-6	SaPosin-like Protein family /// locus:spp-6	---	---	---	2.16
185575_s_at	clec-204	C-type LECtin /// C-type LECtin /// locus:clec-205 /// locus:clec-204	---	binding	integral to membrane	-3.35
185575_s_at	clec-205	C-type LECtin /// C-type LECtin /// locus:clec-205 /// locus:clec-204	---	binding	integral to membrane	-3.35
185579_at	R09F10.8	hypothetical protein /// status:Confirmed	embryonic development ending in birth or egg hatching	---	---	-2.11
185586_at	pll-1	PhosphoLipase C Like	lipid metabolic process /// signal transduction /// intracellular signaling cascade /// pronuclear migration	phosphoinositide phospholipase C activity /// phospholipase C activity /// signal transducer activity /// calcium ion binding /// phosphoric diester hydrolase activity	integral to membrane	1.81
185587_at	H35B03.1	hypothetical protein /// status:Confirmed	---	---	---	2.77
185593_at	H23N18.5	hypothetical protein /// status:Partially_confirmed	phospholipid metabolic process /// lipid catabolic process	phospholipase A2 activity	---	-1.98
185599_s_at	cyp-13B1	CYtochrome P450 family	oxidation reduction	monooxygenase activity /// iron ion binding /// electron carrier activity /// oxidoreductase activity /// oxidoreductase activity /// heme binding /// metal ion binding	integral to membrane	4.69
185601_s_at	F45D11.3	---	---	---	---	-4.69
185617_at	Y51H7C.8	status:Predicted /// hypothetical protein	---	---	---	1.85
185619_s_at	C23H5.8	hypothetical protein	---	protein binding	---	-7.87
185621_at	C28C12.2	hypothetical protein /// status:Confirmed	cytokinesis /// nematode larval development /// embryonic development ending in birth or egg hatching /// growth /// positive regulation of growth rate /// locomotion /// meiotic chromosome segregation /// cell division	---	---	-2.26
185622_at	Y106G6H.4	status:Partially_confirmed /// hypothetical protein	---	---	---	1.99
185624_s_at	T28H11.7	hypothetical protein /// status:Confirmed /// status:Partially_confirmed /// hypothetical protein	---	---	---	3.36
185632_at	pqn-62	Prion-like-(Q/N-rich)-domain-bearing protein /// locus:pqn-62	---	nucleic acid binding	---	2.64
185637_at	M01B12.5	hypothetical protein	nematode larval development /// embryonic development ending in birth or egg hatching /// growth /// positive regulation of growth rate /// positive regulation of multicellular organism growth /// hermaphrodite genitalia development	protein serine/threonine kinase activity /// ATP binding	---	2.72
185675_at	Y53F4B.11	status:Partially_confirmed /// hypothetical protein	---	protein binding	---	1.91
185693_at	W02F12.2	hypothetical protein /// status:Confirmed	lipid metabolic process /// ceramide metabolic process	hydrolase activity /// hydrolase activity, acting on carbon-nitrogen (but not peptide) bonds, in linear amides /// ceramidase activity	Golgi membrane /// endoplasmic reticulum membrane /// membrane /// integral to membrane	1.83
185697_at	C36C5.12	hypothetical protein /// status:Predicted	---	---	membrane /// integral to membrane	1.85
185700_s_at	C14C11.2	hypothetical protein /// status:Partially_confirmed /// status:Partially_confirmed /// hypothetical protein	---	---	---	-2.11
185711_at	T15B7.14	hypothetical protein /// status:Partially_confirmed	---	---	integral to membrane	2.14
185756_at	Y75B8A.25	status:Partially_confirmed /// hypothetical protein	---	---	---	-1.81
185764_s_at	F33D4.6	hypothetical protein	---	protein binding	---	-2.51
185778_at	ttn-1	TiTiN family	protein amino acid phosphorylation /// regulation of Rho protein signal transduction	nucleotide binding /// protein kinase activity /// protein serine/threonine kinase activity /// protein tyrosine kinase activity /// Rho guanyl-nucleotide exchange factor activity /// structural constituent of cell wall /// ATP binding /// kinase activity /// transferase activity	intracellular	2.05
185782_at	T03G11.3	hypothetical protein /// status:Partially_confirmed	---	zinc ion binding	intracellular	1.89
185788_s_at	mtm-3	MTM (myotubularin) family	nematode larval development /// lipid metabolic process /// multicellular organismal development /// determination of adult life span /// embryonic development ending in birth or egg hatching /// body morphogenesis /// dephosphorylation /// oviposition /// collagen and cuticulin-based cuticle development /// positive regulation of growth rate /// locomotion	protein tyrosine phosphatase activity /// zinc ion binding /// lipid binding /// hydrolase activity /// phosphatase activity /// metal ion binding	---	-2.44
185790_at	Y57A10A.5	status:Partially_confirmed /// hypothetical protein	---	---	---	-2.03
185798_at	F28A12.3	hypothetical protein /// status:Partially_confirmed	---	---	integral to membrane	-1.9
185800_at	F55A12.6	hypothetical protein /// status:Predicted	---	---	integral to membrane	3.22
185812_at	C04E12.2	hypothetical protein /// hypothetical protein /// status:Confirmed /// status:Partially_confirmed	---	---	integral to membrane	3.79
185812_at	C04E12.4	hypothetical protein /// hypothetical protein /// status:Confirmed /// status:Partially_confirmed	---	---	integral to membrane	3.79
185815_at	gsto-3	Glutathione S-Transferase, Omega class	metabolic process	glutathione transferase activity /// transferase activity	cytoplasm	2.87
185830_at	W01A11.2	hypothetical protein /// status:Partially_confirmed	embryonic development ending in birth or egg hatching	transferase activity, transferring acyl groups other than amino-acyl groups	integral to membrane	-1.91
185856_s_at	T10B11.8	hypothetical protein /// status:Confirmed	embryonic development ending in birth or egg hatching	---	---	-2.17
185871_s_at	C33C12.9	hypothetical protein /// status:Confirmed	methylation	nucleic acid binding /// methyltransferase activity	---	1.92
185876_at	dmd-7	DM (Doublesex/MAB-3) Domain family	regulation of transcription, DNA-dependent /// sex differentiation	DNA binding /// transcription factor activity	nucleus	2.62
185888_at	C24A11.1	hypothetical protein /// status:Confirmed	---	---	---	3.07
185909_s_at	rab-19	RAB family /// locus:rab-19 /// status:Confirmed /// hypothetical protein	intracellular protein transport /// nucleocytoplasmic transport /// signal transduction /// small GTPase mediated signal transduction /// protein transport	nucleotide binding /// GTPase activity /// protein binding /// GTP binding	intracellular	1.88
185917_at	T28C12.2	hypothetical protein /// status:Partially_confirmed	transport	transporter activity	integral to membrane	4.51
185927_s_at	C17B7.13K02B7.2K02E7.2R09E12.5W03G1.3	hypothetical protein /// hypothetical protein /// hypothetical protein /// hypothetical protein /// hypothetical protein /// status:Predicted /// status:Predicted /// status:Predicted /// status:Predicted	---	---	---	-2.51
185928_s_at	plk-2	POLO Kinase /// locus:plk-2	protein amino acid phosphorylation /// cell cycle /// cell cycle	nucleotide binding /// protein kinase activity /// protein serine/threonine kinase activity /// protein tyrosine kinase activity /// protein binding /// ATP binding /// kinase activity /// transferase activity /// polo kinase kinase activity	nucleus /// nucleus	-2.06
185929_at	F45D11.1	hypothetical protein /// status:Partially_confirmed	---	---	---	-2.64
185939_at	Y106G6A.4	status:Confirmed /// hypothetical protein	---	---	---	1.86
185943_at	F57B10.4	hypothetical protein /// status:Partially_confirmed	---	protein binding	---	-2.32
185948_at	F45F2.11	hypothetical protein /// status:Partially_confirmed	---	---	---	-2.48
185969_s_at	C32F10.4	hypothetical protein /// status:Confirmed	negative regulation of vulval development	---	integral to membrane	2.01
185977_s_at	C02B10.2	hypothetical protein /// status:Partially_confirmed	embryonic development ending in birth or egg hatching	---	---	-2
185981_s_at	F37A8.2	hypothetical protein /// status:Partially_confirmed	positive regulation of growth rate	---	---	3.54
185999_at	C03G6.17	hypothetical protein /// status:Confirmed	---	---	---	4.93
186021_s_at	W03D8.10	hypothetical protein /// hypothetical protein /// status:Confirmed /// status:Predicted	---	---	integral to membrane	2.83
186021_s_at	W03D8.9	hypothetical protein /// hypothetical protein /// status:Confirmed /// status:Predicted	---	---	integral to membrane	2.83
186029_at	fbxa-202	F-box A protein /// locus:fbxa-202	---	---	---	3.18
186034_at	Y102E9.2	hypothetical protein	---	protein binding	---	-1.91
186045_at	Y44E3A.4	status:Partially_confirmed /// hypothetical protein	---	---	---	2
186048_at	try-8	TRYpsin-like Protease /// locus:try-8	proteolysis	catalytic activity /// serine-type endopeptidase activity /// hydrolase activity, acting on carbon-nitrogen (but not peptide) bonds, in cyclic amides	---	-1.85
186066_at	W01A11.7	hypothetical protein /// status:Confirmed	---	---	---	2.54
186070_at	gpa-17	G Protein, Alpha subunit /// locus:gpa-17	signal transduction /// G-protein coupled receptor protein signaling pathway	signal transducer activity /// guanyl nucleotide binding	---	2.1
186078_at	Y17G9B.9	status:Confirmed /// hypothetical protein	---	protein binding	---	-2.62
186093_at	clec-123	C-type LECtin /// locus:clec-123	---	binding	---	2.57
186096_at	C41G11.1	hypothetical protein	---	---	integral to membrane	-2.21
186107_s_at	F36H12.9	hypothetical protein /// hypothetical protein /// status:Partially_confirmed /// status:Partially_confirmed	protein amino acid phosphorylation	protein kinase activity /// protein serine/threonine kinase activity /// ATP binding	---	1.88
186107_s_at	R13H9.6	hypothetical protein /// hypothetical protein /// status:Partially_confirmed /// status:Partially_confirmed	protein amino acid phosphorylation	protein kinase activity /// protein serine/threonine kinase activity /// ATP binding	---	1.88
186115_s_at	gad-1	GAstrulation Defective /// locus:gad-1	establishment of mitotic spindle orientation /// multicellular organismal development /// regulation of mitotic cell cycle /// embryonic development ending in birth or egg hatching /// cell migration involved in gastrulation	protein binding	---	-1.92
186120_at	moc-2	MOlybdenum Cofactor biosynthesis /// locus:moc-2	Mo-molybdopterin cofactor biosynthetic process	---	---	2.09
186124_at	T02B11.4	hypothetical protein /// status:Confirmed	---	---	---	1.97
186132_at	F36H12.2	hypothetical protein /// status:Partially_confirmed	---	---	---	-2.1
186143_at	H20E11.3	hypothetical protein	---	---	---	-2.16
186153_s_at	cgr-1	CRAL/TRIO and GOLD domain suppressor of activated Ras /// locus:cgr-1	nematode larval development	---	---	1.88
186179_at	K05F1.10	hypothetical protein /// status:Partially_confirmed	---	---	---	2.08
186185_s_at	W09D6.4	hypothetical protein /// status:Partially_confirmed /// status:Confirmed /// hypothetical protein	---	---	integral to membrane	3.73
186189_s_at	F54D10.5	hypothetical protein /// status:Confirmed	---	---	---	-2.37
186190_at	F49F1.11	hypothetical protein /// status:Predicted	---	sugar binding	---	-6.44
186194_s_at	clec-8	C-type LECtin /// locus:clec-8	---	binding	---	-1.9
186196_s_at	elo-8	fatty acid ELOngation /// locus:elo-8	---	---	integral to membrane	2.39
186205_at	Y48A5A.1	status:Partially_confirmed /// hypothetical protein	---	---	---	-2.29
186212_at	F54D10.6	---	---	---	---	1.83
186221_at	Y40C5A.3	status:Partially_confirmed /// hypothetical protein	embryonic development ending in birth or egg hatching	---	---	-3.25
186233_at	srbc-20	Serpentine Receptor, class BC (class B-like) /// locus:srbc-20	---	receptor activity	integral to membrane	2.13
186236_s_at	C17B7.7K02B7.1K02E7.3R09E12.6W03G1.4	hypothetical protein /// hypothetical protein /// hypothetical protein /// hypothetical protein /// hypothetical protein /// status:Partially_confirmed /// status:Predicted /// status:Predicted /// status:Predicted /// status:Predicted /// hypothetical protein	embryonic development ending in birth or egg hatching	---	---	-2.32
186239_at	clec-53	C-type LECtin /// locus:clec-53	---	binding /// sugar binding	---	-3.28
186241_s_at	F49C12.14	hypothetical protein /// status:Confirmed	---	---	---	-1.86
186266_at	F02E11.2	hypothetical protein /// status:Predicted	---	---	integral to membrane	1.94
186272_at	ZK1240.8	status:Predicted /// hypothetical protein	---	protein binding /// zinc ion binding	intracellular	-2.86
186273_at	R07C12.1	hypothetical protein /// status:Partially_confirmed	---	---	---	1.88
186274_at	C17H11.1	hypothetical protein /// status:Partially_confirmed	G-protein coupled receptor protein signaling pathway	---	integral to membrane	2.04
186280_s_at	F33G12.3	hypothetical protein /// status:Partially_confirmed	proteolysis	cysteine-type endopeptidase activity	---	-2.1
186281_s_at	C08F11.12	hypothetical protein /// status:Confirmed /// status:Confirmed /// hypothetical protein	---	---	extracellular region	-1.82
186295_at	F36H12.3	hypothetical protein /// status:Partially_confirmed	---	structural molecule activity	---	2.31
186297_s_at	C08F11.10	hypothetical protein /// status:Partially_confirmed	---	---	---	2.82
186299_at	H20E11.2	hypothetical protein /// status:Partially_confirmed	---	---	---	-1.97
186313_at	Y49E10.18	status:Confirmed /// hypothetical protein	lipid metabolic process	triacylglycerol lipase activity	---	-2.14
186333_at	C16C8.11	hypothetical protein /// status:Confirmed	protein modification process	---	---	-1.97
186342_at	C07D10.5	hypothetical protein /// status:Confirmed	---	---	---	-3.09
186356_at	ZC239.16	status:Partially_confirmed /// hypothetical protein	potassium ion transport	voltage-gated potassium channel activity /// protein binding	voltage-gated potassium channel complex /// membrane /// integral to membrane	2.04
186362_s_at	glf-1	GaLactoFuranose synthesis (UGM, UDP-galactopyranose mutase) /// locus:glf-1	nematode larval development /// body morphogenesis /// molting cycle, collagen and cuticulin-based cuticle /// locomotion /// positive regulation of multicellular organism growth	UDP-galactopyranose mutase activity /// isomerase activity	---	-2.5
186365_at	C53C11.2	hypothetical protein /// status:Partially_confirmed	---	---	integral to membrane	3.61
186379_at	C16C8.13	hypothetical protein /// status:Partially_confirmed	protein modification process	---	---	-2.03
186389_at	hcp-1	HoloCentric chromosome binding Protein /// locus:hcp-1	mitotic sister chromatid segregation /// protein localization /// sister chromatid biorientation /// kinetochore assembly	protein binding	---	-1.92
186394_s_at	tag-149	Temporarily Assigned Gene name	---	---	integral to membrane	1.95
186421_at	F21C10.3	hypothetical protein	---	---	integral to membrane	2.05
186425_at	Y62H9A.10	status:Predicted /// hypothetical protein	---	---	integral to membrane	1.85
186428_at	W05G11.2	hypothetical protein /// status:Predicted	embryonic development ending in birth or egg hatching	---	integral to membrane	-3.27
186436_at	set-24	SET (trithorax/polycomb) domain containing /// locus:set-24	---	protein binding	nucleus	-2.05
186437_at	bath-3	BTB and MATH domain containing /// locus:bath-3	---	protein binding	---	-1.97
186443_at	F42A10.7	hypothetical protein /// status:Confirmed	---	---	---	-4.33
186448_at	C23F12.4	hypothetical protein /// status:Confirmed	---	---	---	2.61
186451_s_at	C13A2.11	hypothetical protein /// hypothetical protein /// status:Partially_confirmed /// status:Predicted	---	---	integral to membrane	-2.42
186451_s_at	C13A2.5	hypothetical protein /// hypothetical protein /// status:Partially_confirmed /// status:Predicted	---	---	integral to membrane	-2.42
186453_at	ZK1248.5	status:Partially_confirmed /// hypothetical protein	---	---	---	3.45
186464_s_at	acl-7	ACyLtransferase-like /// locus:acl-7	metabolic process	acyltransferase activity /// transferase activity	---	1.83
186466_s_at	fbxa-215	F-box A protein /// locus:fbxa-215	reproduction	---	---	-1.86
186473_at	C01B12.3	hypothetical protein /// status:Partially_confirmed	---	---	integral to membrane	2.76
186475_at	Y106G6G.4	status:Partially_confirmed /// hypothetical protein	---	---	integral to membrane	3.21
186482_s_at	kca-1	Kinesin Cargo Adaptor /// locus:kca-1	embryonic development ending in birth or egg hatching /// negative regulation of multicellular organism growth	protein binding	---	-3.06
186487_at	T07D4.2	hypothetical protein	---	protein binding /// hydrolase activity	---	3.83
186492_s_at	F15E11.1	hypothetical protein /// hypothetical protein /// status:Predicted /// status:Partially_confirmed	---	---	---	-5.79
186492_s_at	F15E11.14	hypothetical protein /// hypothetical protein /// status:Predicted /// status:Partially_confirmed	---	---	---	-5.79
186504_s_at	C14C11.1	hypothetical protein /// status:Partially_confirmed /// status:Confirmed /// hypothetical protein	---	---	---	1.95
186506_s_at	C48B4.12	hypothetical protein	---	---	integral to membrane	-1.8
186519_at	F15E11.12	hypothetical protein /// status:Confirmed	positive regulation of growth rate	---	---	-4.74
186522_s_at	C17B7.10	hypothetical protein /// hypothetical protein /// status:Partially_confirmed /// status:Partially_confirmed	proteolysis	metalloendopeptidase activity	membrane	2.43
186522_s_at	T28A11.20	hypothetical protein /// hypothetical protein /// status:Partially_confirmed /// status:Partially_confirmed	proteolysis	metalloendopeptidase activity	membrane	2.43
186528_s_at	F46E10.11	hypothetical protein /// status:Confirmed	nematode larval development /// positive regulation of growth rate /// locomotion	protease inhibitor activity	extracellular region	2.4
186539_s_at	Y59E9AL.3	status:Partially_confirmed /// status:Partially_confirmed /// hypothetical protein /// hypothetical protein	---	---	---	2.03
186550_at	T28A11.18	hypothetical protein /// status:Partially_confirmed	---	---	---	3.22
186562_s_at	Y45F10B.13	hypothetical protein	embryonic development ending in birth or egg hatching	---	integral to membrane	3.28
186571_at	Y106G6H.13	status:Confirmed /// hypothetical protein	---	---	---	2.19
186582_s_at	mis-12	human/fission yeast MIS (minichromosome stability) homolog	mitotic spindle organization /// embryonic development ending in birth or egg hatching	---	---	-1.85
186604_s_at	Y38C1AB.5	status:Partially_confirmed /// status:Predicted /// hypothetical protein /// hypothetical protein	---	---	---	1.82
186605_s_at	Y17G7B.10	hypothetical protein	metabolic process	NAD+ kinase activity	---	2.1
186640_s_at	frm-5	FERM domain (protein4.1-ezrin-radixin-moesin) family /// locus:frm-5 /// status:Predicted /// hypothetical protein	nematode larval development /// gonad development /// growth /// regulation of meiosis /// feminization of hermaphroditic germ-line /// regulation of cell proliferation /// meiotic chromosome segregation	binding /// protein binding	cytoskeleton	-1.86
186649_s_at	rmd-4	Regulator of Microtubule Dynamics /// Regulator of Microtubule Dynamics /// locus:rmd-4 /// locus:rmd-6	---	binding	---	3.56
186649_s_at	rmd-6	Regulator of Microtubule Dynamics /// Regulator of Microtubule Dynamics /// locus:rmd-4 /// locus:rmd-6	---	binding	---	3.56
186652_at	ZK512.8	status:Confirmed /// hypothetical protein	---	---	---	2.22
186655_at	T28A11.16	hypothetical protein /// status:Partially_confirmed	---	---	---	2.81
186667_s_at	Y37E11B.3	status:Confirmed /// hypothetical protein	---	---	---	-2.23
186684_s_at	C48B4.7	hypothetical protein /// status:Partially_confirmed	---	---	integral to membrane	-1.83
186713_at	ZK512.7	status:Confirmed /// hypothetical protein	reproduction	---	---	-2.4
186714_s_at	ZK512.7	status:Confirmed /// hypothetical protein	reproduction	---	---	-2.12
186715_at	F46C5.2	hypothetical protein /// status:Confirmed	---	---	membrane /// integral to membrane	2.22
186716_at	ZK637.4	status:Partially_confirmed /// hypothetical protein	---	---	---	2.33
186718_at	F46C5.7	hypothetical protein /// status:Partially_confirmed	---	---	membrane /// integral to membrane	1.9
186720_at	T28A11.19	hypothetical protein /// status:Partially_confirmed	---	---	---	12.66
186726_at	nspe-1	locus:nspe-1 /// hypothetical protein	---	---	integral to membrane	1.93
186740_s_at	thn-5	THaumatiN family /// locus:thn-5	---	---	---	-5.61
186745_s_at	Y38E10A.17	status:Partially_confirmed /// hypothetical protein	---	---	---	2.13
186762_s_at	Y18D10A.11	status:Confirmed /// hypothetical protein	---	protein binding	integral to membrane	-2.11
186781_at	F35F10.13	hypothetical protein /// status:Partially_confirmed	---	---	---	4.98
186799_at	Y105C5B.15	status:Confirmed /// hypothetical protein	---	acid phosphatase activity /// hydrolase activity /// metal ion binding	---	-5.05
186800_s_at	C33F10.11	hypothetical protein /// status:Confirmed	---	---	integral to membrane	2.43
186801_s_at	F45D11.14	hypothetical protein /// hypothetical protein /// hypothetical protein /// status:Predicted /// status:Predicted /// status:Predicted	---	---	---	-2.78
186801_s_at	F45D11.15	hypothetical protein /// hypothetical protein /// hypothetical protein /// status:Predicted /// status:Predicted /// status:Predicted	---	---	---	-2.78
186801_s_at	F45D11.16	hypothetical protein /// hypothetical protein /// hypothetical protein /// status:Predicted /// status:Predicted /// status:Predicted	---	---	---	-2.78
186811_s_at	ZK550.6	status:Confirmed /// hypothetical protein	oxidation reduction	iron ion binding /// oxidoreductase activity /// oxidoreductase activity, acting on single donors with incorporation of molecular oxygen, incorporation of two atoms of oxygen /// L-ascorbic acid binding /// metal ion binding /// phytanoyl-CoA dioxygenase activity	---	-1.98
186830_at	Y113G7A.12	status:Partially_confirmed /// hypothetical protein	---	---	---	1.83
186834_at	VW02B12L.2	hypothetical protein /// status:Partially_confirmed	protein amino acid dephosphorylation /// dephosphorylation	protein tyrosine phosphatase activity /// phosphatase activity	---	1.83
186836_at	Y52B11A.10	status:Partially_confirmed /// hypothetical protein	nematode larval development /// RNA metabolic process /// growth /// positive regulation of multicellular organism growth	binding /// protein binding	---	2.16
186847_s_at	T05G5.8	hypothetical protein /// status:Partially_confirmed	negative regulation of multicellular organism growth	---	---	-1.99
186851_at	hse-5	Heparan Sulfate-glucuronic acid-5-Epimerase /// locus:hse-5	glycosaminoglycan biosynthetic process /// positive regulation of growth rate /// positive regulation of multicellular organism growth /// positive regulation of multicellular organism growth	isomerase activity /// racemase and epimerase activity, acting on carbohydrates and derivatives	extracellular region /// proteinaceous extracellular matrix /// basement membrane /// plasma membrane /// membrane /// integral to membrane	-1.87
186859_at	C05B5.2	hypothetical protein /// status:Partially_confirmed	---	---	integral to membrane	-1.89
186862_at	Y51H7BR.3	status:Partially_confirmed /// hypothetical protein	---	protein binding	integral to membrane	2.2
186866_at	set-3	SET (trithorax/polycomb) domain containing	nematode larval development /// growth	---	nucleus	-2.26
186874_s_at	Y65B4BL.3	status:Partially_confirmed /// hypothetical protein	locomotion	---	integral to membrane	-2.05
186880_at	C25E10.10	hypothetical protein /// status:Partially_confirmed	---	---	---	2.28
186881_at	Y18D10A.21	status:Partially_confirmed /// hypothetical protein	---	---	---	1.87
186903_at	Y55B1BL.1	status:Confirmed /// hypothetical protein	---	---	integral to membrane	1.81
186921_s_at	Y53C10A.13	---	---	---	---	2.23
186952_at	deps-1	DEfective P granules and Sterile /// locus:deps-1	reproduction /// nematode larval development /// embryonic development ending in birth or egg hatching /// growth	---	---	-2
186958_s_at	sep-1	SEParase /// locus:sep-1	reproduction /// proteolysis /// meiosis /// embryonic development ending in birth or egg hatching /// hermaphrodite genitalia development /// meiotic chromosome segregation	protein binding /// peptidase activity	nucleus	-1.88
186976_s_at	Y116A8C.38	status:Partially_confirmed /// status:Partially_confirmed /// hypothetical protein /// hypothetical protein	protein amino acid phosphorylation	nucleotide binding /// protein kinase activity /// protein serine/threonine kinase activity /// protein tyrosine kinase activity /// protein binding /// ATP binding /// kinase activity /// transferase activity	---	1.97
186986_at	F55H2.7	hypothetical protein /// status:Confirmed	---	---	---	-1.99
187006_at	C46H11.10	hypothetical protein	---	---	---	2.26
187010_s_at	Y14H12B.2	status:Confirmed /// hypothetical protein	---	---	---	-1.91
187013_at	Y77E11A.2	status:Confirmed /// hypothetical protein	metabolic process	NAD+ kinase activity /// protein binding	---	1.99
187019_at	F37C12.10	hypothetical protein /// status:Predicted	positive regulation of growth rate	---	integral to membrane	-2.15
187025_at	Y57A10A.10	status:Partially_confirmed /// hypothetical protein	monovalent inorganic cation transport	cation channel activity	membrane /// integral to membrane	1.83
187026_s_at	pvf-1	PDGF/VEGF growth factor related /// locus:pvf-1	---	growth factor activity	membrane	1.95
187029_at	C17H12.10	hypothetical protein /// status:Confirmed	---	---	integral to membrane	1.81
187047_at	lec-6	gaLECtin /// locus:lec-6	---	sugar binding	---	-1.93
187066_at	Y55B1AR.4	status:Confirmed /// hypothetical protein	---	---	---	1.96
187079_at	Y57G11C.33	status:Confirmed /// hypothetical protein	---	---	---	-1.88
187084_at	gst-10	Glutathione S-Transferase /// locus:gst-10	glutathione metabolic process /// response to stress /// determination of adult life span /// response to UV-C /// response to hydrogen peroxide	glutathione transferase activity /// glutathione transferase activity /// transferase activity	---	-3.35
187085_s_at	gst-10	hypothetical protein /// Glutathione S-Transferase /// locus:gst-10 /// status:Confirmed	glutathione metabolic process /// response to stress /// determination of adult life span /// response to UV-C /// response to hydrogen peroxide	glutathione transferase activity /// glutathione transferase activity /// transferase activity	---	-4.07
187089_s_at	zif-1	locus:zif-1 /// ZInc Finger-interacting protein	ubiquitin-dependent protein catabolic process /// ubiquitin-dependent protein catabolic process /// multicellular organismal development /// embryonic development ending in birth or egg hatching	protein binding	---	-1.87
187092_s_at	F33D11.9	hypothetical protein	---	---	integral to membrane /// GPI-anchor transamidase complex	-1.88
187096_at	Y113G7B.14	status:Partially_confirmed /// hypothetical protein	---	DNA binding /// ATP binding	---	1.97
187141_at	byn-1	mammalian BYstiN (adhesion protein) related /// locus:byn-1	reproduction /// nematode larval development /// cell adhesion /// embryonic development ending in birth or egg hatching /// growth /// positive regulation of growth rate /// hermaphrodite genitalia development	protein binding	---	1.81
187143_s_at	ZK637.12	status:Confirmed /// status:Partially_confirmed /// hypothetical protein /// hypothetical protein	---	---	---	3.21
187144_at	ulp-4	Ubiquitin-Like Protease /// locus:ulp-4	proteolysis /// embryonic development ending in birth or egg hatching /// body morphogenesis /// oviposition /// positive regulation of growth rate /// hermaphrodite genitalia development	peptidase activity /// cysteine-type peptidase activity /// hydrolase activity	---	2.03
187152_at	Y110A7A.9	hypothetical protein	---	---	---	-1.81
187154_at	Y62E10A.14	status:Confirmed /// hypothetical protein	embryonic development ending in birth or egg hatching	protein binding	---	-3.19
187165_at	C28C12.11	hypothetical protein	---	---	integral to membrane	3.35
187170_at	F59B2.12	hypothetical protein /// status:Partially_confirmed	---	---	---	-20.28
187197_s_at	C13B9.1	hypothetical protein /// hypothetical protein /// status:Predicted /// status:Confirmed	morphogenesis of an epithelium /// nematode larval development /// body morphogenesis /// growth /// negative regulation of vulval development	---	---	2.32
187197_s_at	F23A7.7	hypothetical protein /// hypothetical protein /// status:Predicted /// status:Confirmed	morphogenesis of an epithelium /// nematode larval development /// body morphogenesis /// growth /// negative regulation of vulval development	---	---	2.32
187203_at	C06G4.4	hypothetical protein /// status:Confirmed	---	---	integral to membrane	1.83
187209_at	C02C2.5	hypothetical protein /// status:Partially_confirmed	---	oxidoreductase activity	integral to membrane	1.98
187213_at	EEED8.3	hypothetical protein /// status:Confirmed	embryonic development ending in birth or egg hatching	binding /// protein binding	---	-1.85
187215_at	C38C10.3	hypothetical protein /// status:Partially_confirmed	---	---	---	1.95
187222_at	D1044.1	hypothetical protein /// status:Partially_confirmed	---	kinase activity /// transferase activity	---	-2.32
187224_at	F02A9.1	hypothetical protein /// status:Partially_confirmed	---	---	membrane /// integral to membrane	1.97
187225_s_at	F02A9.1	hypothetical protein /// status:Partially_confirmed	---	---	membrane /// integral to membrane	1.83
187234_s_at	Y110A2AL.9	status:Partially_confirmed /// hypothetical protein	---	---	---	-1.96
187244_at	B0228.1	hypothetical protein /// status:Partially_confirmed	---	---	---	1.96
187248_at	unc-79	UNCoordinated	positive regulation of growth rate /// locomotion /// positive regulation of locomotion /// response to drug	---	---	2.55
187268_at	F22B7.3	hypothetical protein /// status:Predicted	---	---	---	1.89
187276_s_at	T16H12.11	hypothetical protein /// status:Partially_confirmed	embryonic development ending in birth or egg hatching	---	---	-1.91
187277_s_at	F25B5.2	hypothetical protein /// status:Confirmed	reproduction /// hermaphrodite genitalia development	---	---	-1.88
187278_at	C28H8.5	hypothetical protein	---	---	---	-2.19
187280_s_at	ppw-2	PAZ/PIWI domain-containing /// locus:ppw-2	---	nucleic acid binding	---	-1.94
187283_at	Y110A2AL.7	status:Partially_confirmed /// hypothetical protein	---	---	---	-10.19
187284_at	C34C12.7	hypothetical protein /// status:Partially_confirmed	---	---	---	2.7
187286_at	F07F6.1	hypothetical protein /// status:Partially_confirmed	---	nucleotide binding	---	2.77
187292_s_at	C05C10.5	hypothetical protein	embryonic development ending in birth or egg hatching /// body morphogenesis /// meiotic chromosome segregation	protein binding	---	-1.92
187296_at	lin-52	abnormal cell LINeage /// locus:lin-52	reproduction /// nematode larval development /// transcription /// regulation of transcription, DNA-dependent /// embryonic development /// negative regulation of signal transduction /// oviposition /// growth /// negative regulation of vulval development	---	nucleus /// chromosome	-1.96
187307_at	knl-1	Kinetochore NuLl /// locus:knl-1	reproduction /// embryonic development ending in birth or egg hatching /// hermaphrodite genitalia development	protein binding	---	-2.19
187309_at	ZK1128.3	status:Partially_confirmed /// hypothetical protein	morphogenesis of an epithelium /// nematode larval development /// growth /// positive regulation of growth rate /// locomotion /// hermaphrodite genitalia development	---	---	2.1
187312_at	Y110A2AL.3	status:Partially_confirmed /// hypothetical protein	---	---	integral to membrane	-1.96
187318_at	lon-1	LONg	reproduction /// transforming growth factor beta receptor signaling pathway /// embryonic development ending in birth or egg hatching /// negative regulation of DNA endoreduplication /// positive regulation of growth rate /// positive regulation of growth rate /// negative regulation of multicellular organism growth /// negative regulation of multicellular organism growth	protein binding	extracellular region	-2.84
187323_at	F13D12.6	hypothetical protein /// serine carboxypeptidase	proteolysis	carboxypeptidase activity /// serine-type carboxypeptidase activity /// peptidase activity /// hydrolase activity	integral to membrane	-3.1
187332_s_at	C37C3.2	hypothetical protein	reproduction /// nematode larval development /// translation /// translational initiation /// translational initiation /// embryonic development ending in birth or egg hatching /// molting cycle, collagen and cuticulin-based cuticle /// growth /// positive regulation of growth rate	nucleotide binding /// translation initiation factor activity /// binding /// GTP binding	eukaryotic translation initiation factor 2B complex	1.95
187336_at	Y110A7A.15	hypothetical protein	---	---	---	-2.12
187339_s_at	set-4	SET (trithorax/polycomb) domain containing /// locus:set-4	transcription /// regulation of transcription, DNA-dependent /// embryonic development ending in birth or egg hatching /// chromatin modification	methyltransferase activity /// transferase activity /// histone-lysine N-methyltransferase activity	nucleus /// chromosome	-2.11
187346_at	C16C10.3	hypothetical protein /// status:Partially_confirmed	nematode larval development /// growth	nucleic acid binding	---	-2.21
187355_at	C32D5.1	hypothetical protein /// status:Confirmed	---	---	---	2.24
187367_at	ZK1098.9	status:Predicted /// hypothetical protein	embryonic development ending in birth or egg hatching	---	integral to membrane	2.26
187377_at	F37A4.5	hypothetical protein /// status:Partially_confirmed	---	phosphopantetheine binding	---	2.68
187379_at	C45G9.2	hypothetical protein /// status:Confirmed	tRNA processing /// metabolic process /// oxidation reduction	catalytic activity /// oxidoreductase activity /// tRNA dihydrouridine synthase activity /// FAD binding	---	-2.15
187383_s_at	bath-41	BTB and MATH domain containing /// locus:bath-41	ubiquitin-dependent protein catabolic process	protein binding /// protein binding	---	-1.87
187385_s_at	tag-76	Temporarily Assigned Gene name	---	nucleic acid binding	---	2.23
187390_at	C02F5.5	hypothetical protein /// status:Partially_confirmed	---	---	integral to membrane	3.83
187404_at	B0416.2	hypothetical protein /// status:Partially_confirmed	---	---	---	1.84
187412_at	C18H9.6	hypothetical protein /// status:Partially_confirmed	---	---	---	-3.18
187413_at	C04F6.2	hypothetical protein /// status:Partially_confirmed	---	---	integral to membrane	2.32
187431_at	C45G9.15	hypothetical protein /// status:Partially_confirmed	---	---	---	2.48
187433_at	ZK1307.2	status:Confirmed /// hypothetical protein	---	---	---	3.22
187438_s_at	B0361.9	hypothetical protein /// status:Confirmed	positive regulation of growth rate	---	---	1.97
187444_at	clec-158	C-type LECtin /// locus:clec-158	---	binding	---	-2.02
187454_at	Y55F3AM.11	status:Partially_confirmed /// hypothetical protein	---	---	integral to membrane	-2.89
187457_at	B0416.4	hypothetical protein /// status:Partially_confirmed	---	protein binding /// zinc ion binding /// metal ion binding	---	-2.58
187458_at	dnj-28	DNaJ domain (prokaryotic heat shock protein) /// locus:dnj-28	response to stress	binding /// heat shock protein binding	---	-1.87
187470_s_at	R06F6.8	hypothetical protein	---	protein binding	membrane /// integral to membrane	-1.95
187484_at	B0252.5	hypothetical protein /// status:Partially_confirmed	---	---	---	3.34
187515_at	B0304.2	hypothetical protein /// status:Partially_confirmed	---	---	---	-2.05
187520_at	T16H12.9	hypothetical protein /// status:Partially_confirmed	---	---	---	2.24
187525_s_at	cpg-2	Chondroitin ProteoGlycan /// locus:cpg-2	cytokinesis after mitosis /// chitin metabolic process /// cell cycle /// multicellular organismal development /// embryonic development /// eggshell formation /// cell division	chitin binding /// chitin binding	extracellular region	-1.81
187527_at	Y71F9AL.14	status:Confirmed /// hypothetical protein	embryonic development ending in birth or egg hatching /// pronuclear migration	transferase activity	---	-1.81
187529_s_at	ZK1307.4	status:Confirmed /// status:Partially_confirmed /// hypothetical protein /// hypothetical protein	---	structural molecule activity	---	1.9
187541_at	Y110A2AR.1	status:Confirmed /// hypothetical protein	---	---	integral to membrane	-1.92
187549_at	T28D9.9	hypothetical protein /// status:Partially_confirmed	---	---	---	3.38
187552_s_at	C45G9.4	hypothetical protein /// hypothetical protein /// status:Partially_confirmed /// status:Partially_confirmed	positive regulation of growth rate	---	---	1.87
187552_s_at	C45G9.9	hypothetical protein /// hypothetical protein /// status:Partially_confirmed /// status:Partially_confirmed	positive regulation of growth rate	---	---	1.87
187553_at	D1044.4	hypothetical protein /// status:Predicted	---	---	---	1.97
187582_at	nlp-11	Neuropeptide-Like Protein /// locus:nlp-11	neuropeptide signaling pathway	---	---	2.11
187587_at	F58F12.2	hypothetical protein /// status:Predicted	---	---	integral to membrane	2.1
187608_s_at	Y55F3AM.10	status:Confirmed /// hypothetical protein	---	protein binding	---	3.11
187612_s_at	F47D12.7	hypothetical protein /// status:Partially_confirmed	---	protein binding	---	2.49
187628_s_at	C30G12.6	hypothetical protein	embryonic development ending in birth or egg hatching	---	---	-2.39
187637_at	C32D5.10	hypothetical protein /// status:Partially_confirmed	nematode larval development /// growth	protein binding /// zinc ion binding /// metal ion binding	---	-1.97
187645_at	C46C2.5	hypothetical protein /// status:Partially_confirmed	---	---	integral to membrane	-2.13
187654_s_at	F11G11.9	hypothetical protein /// status:Partially_confirmed	---	thiosulfate sulfurtransferase activity /// transferase activity	integral to membrane	4.13
187656_s_at	ntp-1	Nucleoside TriPhosphatase /// locus:ntp-1	---	hydrolase activity /// nucleoside-triphosphatase activity	Golgi membrane /// Golgi apparatus /// membrane /// integral to membrane	-1.85
187663_at	F11E6.1	hypothetical protein	carbohydrate metabolic process /// sphingolipid metabolic process /// lysosome organization	catalytic activity /// glucosylceramidase activity /// cation binding	lysosome	2.37
187664_s_at	F11E6.1	hypothetical protein	carbohydrate metabolic process /// sphingolipid metabolic process /// lysosome organization	catalytic activity /// glucosylceramidase activity /// cation binding	lysosome	2.39
187687_s_at	C05D11.9	hypothetical protein /// status:Confirmed	tRNA 5'-leader removal /// nematode larval development /// regulation of transcription, DNA-dependent /// RNA processing /// embryonic development ending in birth or egg hatching /// body morphogenesis /// growth /// positive regulation of growth rate	transcription factor activity /// ribonuclease P activity /// sequence-specific DNA binding	intracellular	-1.87
187729_s_at	tre-5	TREhalase /// locus:tre-5	nematode larval development /// trehalose metabolic process /// embryonic development ending in birth or egg hatching /// growth	catalytic activity /// alpha,alpha-trehalase activity	---	10.13
187743_at	ife-5	Initiation Factor 4E (eIF4E) family /// locus:ife-5	translation /// translational initiation /// regulation of translation	RNA binding /// translation initiation factor activity	cytoplasm	-1.9
187752_at	pgl-3	P GranuLe abnormality	embryonic development ending in birth or egg hatching	---	---	-1.88
187760_at	C05D2.8	hypothetical protein /// status:Confirmed	positive regulation of growth rate	---	integral to membrane	-2.33
187761_s_at	C05D2.8	hypothetical protein /// status:Confirmed	positive regulation of growth rate	---	integral to membrane	-2.98
187774_s_at	ZK1290.11	status:Partially_confirmed /// hypothetical protein	---	---	integral to membrane	-14.86
187779_s_at	T12C9.7	hypothetical protein	reproduction /// positive regulation of multicellular organism growth	---	nucleus	-2.43
187802_at	cgh-1	Conserved Germline Helicase /// locus:cgh-1	reproduction /// morphogenesis of an epithelium /// nematode larval development /// apoptosis /// anti-apoptosis /// multicellular organismal development /// gamete generation /// spermatogenesis /// determination of adult life span /// embryonic development ending in birth or egg hatching /// mRNA metabolic process /// cell differentiation /// growth /// positive regulation of growth rate /// he…	nucleotide binding /// nucleic acid binding /// RNA binding /// helicase activity /// protein binding /// ATP binding /// ATP-dependent helicase activity /// hydrolase activity	cytoplasm	-1.94
187824_at	ZK1290.10	status:Partially_confirmed /// hypothetical protein	---	---	---	-2.07
187842_s_at	F43E2.6	---	---	---	---	4.17
187858_at	ctn-1	alpha-CaTuliN (catenin/vinculin related)	cell adhesion	structural molecule activity /// protein binding /// cadherin binding	actin cytoskeleton /// integral to membrane	2.33
187861_at	vps-33.2	related to yeast Vacuolar Protein Sorting factor /// locus:vps-33.2	vesicle docking during exocytosis /// vesicle-mediated transport	---	---	-5.65
187863_s_at	F26F12.3	hypothetical protein	---	---	---	2.3
187874_at	kin-3	protein KINase /// locus:kin-3	reproduction /// protein amino acid phosphorylation /// embryonic development ending in birth or egg hatching /// Wnt receptor signaling pathway /// positive regulation of growth rate /// hermaphrodite genitalia development	nucleotide binding /// protein kinase activity /// protein serine/threonine kinase activity /// protein tyrosine kinase activity /// ATP binding /// kinase activity /// transferase activity	cilium /// axon /// dendrite /// cell soma	1.95
187876_at	ubc-17	UBiquitin Conjugating enzyme /// locus:ubc-17	ubiquitin-dependent protein catabolic process /// post-translational protein modification /// regulation of protein metabolic process	ligase activity /// small conjugating protein ligase activity	---	1.95
187877_s_at	spd-1	SPindle Defective /// locus:spd-1	reproduction /// morphogenesis of an epithelium /// cytokinesis, completion of separation /// gonad development /// embryonic development ending in birth or egg hatching /// body morphogenesis /// oviposition /// positive regulation of growth rate /// locomotion /// regulation of multicellular organism growth /// negative regulation of multicellular organism growth /// positive regulation of loco…	---	---	-2.48
187898_at	Y54E10BR.4	---	---	---	---	1.98
187904_at	tlp-1	T lineage defect, LePtoderan tail /// locus:tlp-1	---	zinc ion binding	intracellular	3.04
187919_s_at	T09B4.7	hypothetical protein /// status:Partially_confirmed	protein amino acid phosphorylation	protein kinase activity /// protein serine/threonine kinase activity /// ATP binding	---	1.98
187920_at	sir-2.2	yeast SIR related	chromatin silencing /// regulation of transcription, DNA-dependent /// protein amino acid deacetylation	DNA binding /// zinc ion binding /// NAD-dependent histone deacetylase activity /// NAD binding	chromatin silencing complex	1.96
187926_s_at	pes-2.1	Patterned Expression Site /// Patterned Expression Site /// locus:pes-2.1 /// locus:pes-2.2	determination of adult life span	---	---	-2.32
187926_s_at	pes-2.2	Patterned Expression Site /// Patterned Expression Site /// locus:pes-2.1 /// locus:pes-2.2	determination of adult life span	---	---	-2.32
187931_s_at	twk-6	hypothetical protein /// TWiK family of potassium channels /// locus:twk-6 /// status:Partially_confirmed	transport /// ion transport /// potassium ion transport	ion channel activity /// potassium channel activity	membrane /// integral to membrane	3.36
187944_at	flp-4	FMRF-Like Peptide /// locus:flp-4	---	---	---	2.74
187964_at	lipase	hypothetical protein /// lipase	lipid metabolic process	---	---	-4.52
187971_at	mes-6	Maternal Effect Sterile /// locus:mes-6	reproduction /// nematode larval development /// transcription /// regulation of transcription, DNA-dependent /// multicellular organismal development	---	nucleus	-2.08
187987_at	fkb-7	FK506-Binding protein family /// locus:fkb-7	protein folding	calcium ion binding	---	-2.13
188006_s_at	toc-1	similar to Transporter Of divalent Cations	cation transport /// oviposition /// positive regulation of growth rate	cation transmembrane transporter activity	membrane /// integral to membrane	-1.85
188010_at	Y39B6A.24	status:Partially_confirmed /// hypothetical protein	proteolysis	aspartic-type endopeptidase activity /// peptidase activity /// hydrolase activity	---	-3.73
188022_s_at	clec-91	C-type LECtin /// locus:clec-91	---	binding /// sugar binding	extracellular region	-1.9
188027_s_at	cku-80	Caenorhabditis KU /// locus:cku-80	double-strand break repair via nonhomologous end joining	DNA binding /// ATP-dependent DNA helicase activity /// binding	nucleus	-2.1
188030_s_at	flp-15	---	---	---	---	2.25
188039_at	smg-5	Suppressor with Morphological effect on Genitalia /// locus:smg-5	nuclear-transcribed mRNA catabolic process, nonsense-mediated decay /// RNA interference /// embryonic genitalia morphogenesis	protein phosphatase type 2A regulator activity	---	-1.86
188040_at	lips-5	LIPaSe related	---	---	---	-2.23
188043_at	dpf-6	Dipeptidyl Peptidase Four (IV) family	proteolysis	aminopeptidase activity /// serine-type endopeptidase activity /// peptidase activity /// serine-type peptidase activity /// hydrolase activity	plasma membrane /// membrane /// integral to membrane	2.59
188047_at	ins-37	INSulin related /// locus:ins-37	---	hormone activity	extracellular region	2.98
188050_at	sss-2	Sperm-Specific family, class S /// locus:sss-2	---	---	---	2.34
188066_at	ptr-1	PaTched Related family /// locus:ptr-1	molting cycle, collagen and cuticulin-based cuticle /// locomotion /// positive regulation of multicellular organism growth	hedgehog receptor activity /// phosphopantetheine binding	membrane /// integral to membrane	-1.99
188078_at	lipase	hypothetical protein /// lipase	lipid metabolic process	---	---	-1.86
[truncated: 789 more rows]
