# Supplementary material for: A Two-tiered compensatory response to loss of DNA repair modulates aging and stress response pathways
Source: Aging (Albany NY). 2010 Mar 29;2(3):133–59. doi: 10.18632/aging.100127 (PMC2871243; doi:10.18632/aging.100127)
Supplement: Supplementary Table 5 — Gene Ontology classes enriched in NER mutant from Evert et al. 2004. Gene Ontology classes enriched in BERNER mutant from Evert et al. 2004. Gene Ontology enriched classes unique to each mutant from Evert et al. 2004. [file aging-02-133-s005.xls]

## Sheet: BER
Gene Ontology classes enriched in BER mutant from Evert et al, 2004
GO ID	Description	p-value	Adjusted p-value
22403	cell cycle phase	0.00069051	0.097223
22402	cell cycle process	0.0020783	0.14631
6260	DNA replication	8.3015e-05	0.021717
43284	biopolymer biosynthetic process	0.032773	0.75578
43283	biopolymer metabolic process	9.2544e-05	0.021717
6259	DNA metabolic process	0.013313	0.50663
10467	gene expression	0.37159	0.89665
7049	cell cycle	8.2958e-05	0.021717
6397	mRNA processing	5.7909e-05	0.021717
7067	mitosis	0.00017311	0.03482
6394	RNA processing	0.0065569	0.35508
6139	nucleobase, nucleoside, nucleotide and nucleic acid metabolic process	8.7971e-05	0.021717
87	M phase of mitotic cell cycle	0.00022946	0.040386
3673	Gene_Ontology	1	1
16071	mRNA metabolic process	0.0010732	0.10414
16070	RNA metabolic process	0.00079146	0.10131
44237	cellular metabolic process	0.1434	0.75578
44238	primary metabolic process	0.13653	0.75578
9058	biosynthetic process	0.99344	1
9059	macromolecule biosynthetic process	0.85747	1
278	mitotic cell cycle	4.7223e-05	0.021717
279	M phase	0.0023559	0.15796
8150	biological_process	1	1
8151	cellular process	0.0011741	0.10414
43170	macromolecule metabolic process	0.007052	0.36527
8152	metabolic process	0.20683	0.8488

## Sheet: NER
Gene Ontology classes enriched in NER mutant from Evert et al, 2004
GO ID	Description	p-value	Adjusted p-value
50791	regulation of biological process	3.2461e-08	3.5252e-06
9451	RNA modification	0.0002474	0.0077878
43285	biopolymer catabolic process	0.00015639	0.0054788
43284	biopolymer biosynthetic process	0.035261	0.31648
43283	biopolymer metabolic process	1.6696e-20	3.6264e-17
43632	modification-dependent macromolecule catabolic process	1.8173e-06	0.00011961
6350	transcription	1.0595e-09	1.7701e-07
6357	regulation of transcription from RNA polymerase II promoter	0.00031442	0.0094851
51179	localization	0.019583	0.21161
6355	regulation of transcription, DNA-dependent	5.3422e-11	1.2893e-08
7067	mitosis	5.1539e-08	4.4777e-06
43412	biopolymer modification	1.2556e-16	9.0907e-14
19219	regulation of nucleobase, nucleoside, nucleotide and nucleic acid metabolic process	2.7245e-11	7.3969e-09
16071	mRNA metabolic process	1.6103e-06	0.0001093
16070	RNA metabolic process	6.3532e-19	6.8996e-16
16072	rRNA metabolic process	1.2714e-05	0.00062762
51234	establishment of localization	0.023609	0.23851
9058	biosynthetic process	0.98148	1
9059	macromolecule biosynthetic process	0.90359	1
9056	catabolic process	0.013358	0.16486
9057	macromolecule catabolic process	0.0081122	0.11986
278	mitotic cell cycle	1.0764e-08	1.5586e-06
279	M phase	0.00031146	0.0094851
22403	cell cycle phase	2.2873e-05	0.001035
22402	cell cycle process	2.7413e-05	0.0011908
6468	protein amino acid phosphorylation	2.6068e-05	0.0011555
40023	establishment of nucleus localization	0.00023909	0.0076369
8104	protein localization	3.9824e-06	0.00024027
19538	protein metabolic process	0.61915	0.98988
6374	nuclear mRNA splicing, via spliceosome	2.6604e-08	3.0412e-06
48523	negative regulation of cellular process	0.0015273	0.033849
16568	chromatin modification	1.4984e-05	0.00072322
7049	cell cycle	3.8568e-05	0.0015513
43161	proteasomal ubiquitin-dependent protein catabolic process	5.7794e-05	0.0021643
19222	regulation of metabolic process	0.00014497	0.0051619
819	sister chromatid segregation	3.4877e-08	3.6073e-06
15031	protein transport	1.5641e-05	0.00073851
9890	negative regulation of biosynthetic process	0.00032194	0.0095787
6810	transport	0.04802	0.38345
46907	intracellular transport	2.2059e-05	0.0010194
16359	mitotic sister chromatid segregation	4.7334e-08	4.2837e-06
9892	negative regulation of metabolic process	0.00027899	0.0086566
51603	proteolysis involved in cellular protein catabolic process	9.6785e-06	0.00048888
10498	proteasomal protein catabolic process	5.7794e-05	0.0021643
45449	regulation of transcription	2.353e-11	7.3011e-09
9889	regulation of biosynthetic process	0.00069536	0.018879
7059	chromosome segregation	5.4357e-06	0.00031909
30163	protein catabolic process	0.00010094	0.003654
60255	regulation of macromolecule metabolic process	0.00098808	0.024955
48519	negative regulation of biological process	0.0010366	0.025837
43170	macromolecule metabolic process	6.2726e-10	1.1353e-07
33036	macromolecule localization	2.4502e-06	0.00015653
16043	cellular component organization and biogenesis	2.8282e-05	0.0012045
31323	regulation of cellular metabolic process	0.00069242	0.018879
31324	negative regulation of cellular metabolic process	0.00021719	0.0071475
6464	protein modification process	3.5719e-13	1.5516e-10
44248	cellular catabolic process	0.053483	0.41819
6397	mRNA processing	1.2797e-07	1.0295e-05
6394	RNA processing	1.623e-07	1.259e-05
6395	RNA splicing	1.0718e-07	8.9535e-06
87	M phase of mitotic cell cycle	2.381e-08	2.873e-06
6399	tRNA metabolic process	2.956e-05	0.0012114
6508	proteolysis	0.057752	0.43859
44237	cellular metabolic process	2.931e-05	0.0012114
44238	primary metabolic process	2.1194e-07	1.5873e-05
6511	ubiquitin-dependent protein catabolic process	8.6318e-06	0.00045728
375	RNA splicing, via transesterification reactions	2.1503e-08	2.7473e-06
377	RNA splicing, via transesterification reactions with bulged adenosine as nucleophile	1.6312e-08	2.2143e-06
65007	biological regulation	4.042e-08	3.9905e-06
8150	biological_process	1	1
74	regulation of cell cycle	5.5003e-05	0.0021333
8151	cellular process	5.8966e-09	9.1482e-07
8152	metabolic process	4.6527e-05	0.0018374
7001	chromosome organization and biogenesis	3.3182e-07	2.3249e-05
6796	phosphate metabolic process	0.0021014	0.043887
6793	phosphorus metabolic process	0.014935	0.18021
44265	cellular macromolecule catabolic process	0.01517	0.18091
51656	establishment of organelle localization	0.092921	0.56062
44267	cellular protein metabolic process	0.62228	0.98988
51252	regulation of RNA metabolic process	1.4027e-10	3.0468e-08
6338	chromatin remodeling	0.00015894	0.0054797
44260	cellular macromolecule metabolic process	0.63709	0.98988
10467	gene expression	0.017451	0.19845
10468	regulation of gene expression	0.0019782	0.042124
6139	nucleobase, nucleoside, nucleotide and nucleic acid metabolic process	1.9193e-14	1.0422e-11
51640	organelle localization	0.25157	0.85288
51641	cellular localization	3.381e-06	0.00020981
3673	Gene_Ontology	1	1
45184	establishment of protein localization	6.9487e-06	0.00039717
51649	establishment of localization in cell	7.1905e-06	0.00040046
44257	cellular protein catabolic process	0.00018579	0.0063051
7154	cell communication	9.3138e-06	0.00048166
51647	nucleus localization	0.00023909	0.0076369
6996	organelle organization and biogenesis	2.5372e-10	5.0099e-08
6325	establishment and/or maintenance of chromatin architecture	0.0003764	0.010757
16197	endosome transport	6.5273e-05	0.0024029
51244	regulation of cellular process	3.306e-07	2.3249e-05
10556	regulation of macromolecule biosynthetic process	0.0011682	0.027818
6914	autophagy	4.2325e-08	3.997e-06
16310	phosphorylation	0.0038434	0.069565
16192	vesicle-mediated transport	0.00019327	0.0064581
43687	post-translational protein modification	2.0327e-12	7.3582e-10
19941	modification-dependent protein catabolic process	8.6318e-06	0.00045728

## Sheet: BERNER
Gene Ontology classes enriched in BERNER mutant from Evert et al, 2004
BERNER	Description	p-value	Adjusted p-value
16043	cellular component organization and biogenesis	0.0001146	0.0048336
31323	regulation of cellular metabolic process	1.8857e-06	0.00015066
31324	negative regulation of cellular metabolic process	0.00017126	0.0061898
50791	regulation of biological process	2.6978e-09	5.8504e-07
6464	protein modification process	0.015903	0.15882
6323	DNA packaging	0.00024992	0.0084307
31325	positive regulation of cellular metabolic process	0.0010293	0.022008
44248	cellular catabolic process	0.74846	0.95503
43285	biopolymer catabolic process	0.070029	0.4042
43284	biopolymer biosynthetic process	0.0036437	0.052678
43283	biopolymer metabolic process	8.4861e-07	7.5776e-05
6350	transcription	2.235e-06	0.00016156
6259	DNA metabolic process	0.0014256	0.028105
6355	regulation of transcription, DNA-dependent	2.8633e-10	1.0866e-07
7067	mitosis	4.3367e-06	0.00026332
87	M phase of mitotic cell cycle	2.6849e-06	0.00018526
6399	tRNA metabolic process	0.012172	0.13789
43412	biopolymer modification	0.0023766	0.039645
19219	regulation of nucleobase, nucleoside, nucleotide and nucleic acid metabolic process	6.0152e-11	6.3277e-08
16070	RNA metabolic process	7.9436e-08	8.6131e-06
51869	response to stimulus	0.058012	0.37839
44237	cellular metabolic process	0.13404	0.54932
16078	tRNA catabolic process	0.00010492	0.0046846
44238	primary metabolic process	0.059153	0.37839
45935	positive regulation of nucleobase, nucleoside, nucleotide and nucleic acid metabolic process	0.0011378	0.023988
9058	biosynthetic process	0.74746	0.95503
9059	macromolecule biosynthetic process	0.2301	0.65903
9056	catabolic process	0.6906	0.94702
6974	response to DNA damage stimulus	1.6412e-07	1.6609e-05
9057	macromolecule catabolic process	0.26712	0.67632
45934	negative regulation of nucleobase, nucleoside, nucleotide and nucleic acid metabolic process	0.00011463	0.0048336
278	mitotic cell cycle	4.1261e-09	6.2634e-07
279	M phase	9.7159e-06	0.00052306
65007	biological regulation	6.7536e-08	7.8862e-06
8150	biological_process	1	1
8151	cellular process	0.0012424	0.025781
74	regulation of cell cycle	0.00013227	0.0054266
75	cell cycle checkpoint	0.00014013	0.0055301
8152	metabolic process	0.20989	0.61785
22403	cell cycle phase	5.4593e-08	6.906e-06
22402	cell cycle process	4.2922e-10	1.3031e-07
7001	chromosome organization and biogenesis	2.9872e-06	0.00019715
6401	RNA catabolic process	0.34883	0.75539
6950	response to stress	0.085139	0.4583
6281	DNA repair	9.9926e-06	0.00052306
44265	cellular macromolecule catabolic process	0.42447	0.82681
44267	cellular protein metabolic process	0.98988	1
51252	regulation of RNA metabolic process	8.3369e-11	6.3277e-08
6338	chromatin remodeling	1.7362e-06	0.00014642
44260	cellular macromolecule metabolic process	0.99332	1
19538	protein metabolic process	0.98349	1
48523	negative regulation of cellular process	0.0001608	0.0061024
51254	positive regulation of RNA metabolic process	0.00022038	0.007603
16568	chromatin modification	2.7166e-05	0.0013303
10467	gene expression	0.015273	0.15479
10468	regulation of gene expression	6.5915e-06	0.00038484
7049	cell cycle	2.2384e-10	1.0866e-07
19222	regulation of metabolic process	2.1956e-06	0.00016156
6139	nucleobase, nucleoside, nucleotide and nucleic acid metabolic process	3.6946e-09	6.2316e-07
16458	gene silencing	4.5702e-05	0.002168
9890	negative regulation of biosynthetic process	0.00030891	0.0099772
3673	Gene_Ontology	1	1
6996	organelle organization and biogenesis	2.8342e-07	2.689e-05
9893	positive regulation of metabolic process	0.0010293	0.022008
9892	negative regulation of metabolic process	0.00019308	0.006816
6325	establishment and/or maintenance of chromatin architecture	0.00016971	0.0061898
45449	regulation of transcription	7.7495e-10	1.9606e-07
51242	positive regulation of cellular process	0.00080744	0.018294
9889	regulation of biosynthetic process	3.5934e-06	0.00022728
10556	regulation of macromolecule biosynthetic process	7.7611e-06	0.00043635
51244	regulation of cellular process	3.3789e-09	6.2316e-07
7059	chromosome segregation	9.6626e-05	0.0044448
6914	autophagy	1.2426e-08	1.7147e-06
60255	regulation of macromolecule metabolic process	1.2564e-05	0.00063573
48519	negative regulation of biological process	0.00014208	0.0055301
48518	positive regulation of biological process	0.00092686	0.020391
43687	post-translational protein modification	0.0002986	0.0098537
43170	macromolecule metabolic process	0.00050491	0.013809

## Sheet: unique for mutant
Gene Ontology enriched classes unique to each mutant from Evert et al, 2004
BERNER	BERNER GO	BER	BER GO	NER	NER GO
		6260	DNA replication	375	RNA splicing, via transesterification reactions
6281	DNA repair			377	RNA splicing, via transesterification reactions with bulged adenosine as nucleophile
				9451	RNA modification
51869	response to stimulus			6357	regulation of transcription from RNA polymerase II promoter
75	cell cycle checkpoint			6374	nuclear mRNA splicing, via spliceosome
6950	response to stress			6395	RNA splicing
6974	response to DNA damage stimulus			16072	rRNA metabolic process
6323	DNA packaging			6468	protein amino acid phosphorylation
16458	gene silencing			16310	phosphorylation
				6793	phosphorus metabolic process
45934	negative regulation of nucleobase, nucleoside, nucleotide and nucleic acid metabolic process			6796	phosphate metabolic process
45935	positive regulation of nucleobase, nucleoside, nucleotide and nucleic acid metabolic process
				7154	cell communication
48518	positive regulation of biological process
51242	positive regulation of cellular process			6508	proteolysis
9893	positive regulation of metabolic process			6511	ubiquitin-dependent protein catabolic process
31325	positive regulation of cellular metabolic process			51603	proteolysis involved in cellular protein catabolic process
				10498	proteasomal protein catabolic process
16078	tRNA catabolic process			19941	modification-dependent protein catabolic process
6401	RNA catabolic process			30163	protein catabolic process
51254	positive regulation of RNA metabolic process			43161	proteasomal ubiquitin-dependent protein catabolic process
				43632	modification-dependent macromolecule catabolic process
65007	biological regulation			44257	cellular protein catabolic process
				6810	transport
				8104	protein localization
				15031	protein transport
				16192	vesicle-mediated transport
				16197	endosome transport
				46907	intracellular transport
				45184	establishment of protein localization
				51179	localization
				51234	establishment of localization
				51640	organelle localization
				51641	cellular localization
				51647	nucleus localization
				51649	establishment of localization in cell
				51656	establishment of organelle localization
				33036	macromolecule localization
				40023	establishment of nucleus localization
				16359	mitotic sister chromatid segregation
				819	sister chromatid segregation
